# Supplementary material
Source: PubMed Central journal article supplement (PMC4394111)
Supplement: ja512880g_si_001.pdf [file ja512880g_si_001.pdf]

## Supporting Information

### **Peptide/Protein Stapling and Unstapling: Introduction of s-Tetrazine, Photochemical Release, and Regeneration of the Peptide/Protein**

Stephen P. Brown, Amos B. Smith, III\*

*Department of Chemistry, University of Pennsylvania, Philadelphia, Pennsylvania 19104*

## Table of Contents

|                                                                                              |      |
|----------------------------------------------------------------------------------------------|------|
| General Methods.....                                                                         | S-3  |
| General Procedures for the Resin Loading .....                                               | S-4  |
| General Procedures for Manual Solid-Phase Peptide Synthesis .....                            | S-5  |
| General Procedures for Peptide Cleavage and Global Deprotection .....                        | S-5  |
| General Phase-Transfer Protocol for Tetrazine Insertion .....                                | S-24 |
| Colormetric Change that Occurs After Mixing the Biphasic Mixture for 1 Minute.....           | S-24 |
| UV-Vis Spectrum of Peptide 2a [73 $\mu$ M] in pH 7.8 buffer .....                            | S-28 |
| Calculating the Extinction Coefficient for Peptide 2a at 280, 410 and 532 nm .....           | S-29 |
| Table of Stability Data for the S,S-Tetrazine Peptide 2a.....                                | S-30 |
| General Procedure for Unstapling S,S-Tetrazine Peptides Photochemically.....                 | S-47 |
| Colormetric Change that Occurs After Irradiation in a Rayonet <sup>®</sup> Photoreactor..... | S-47 |
| General Nitrile Removal Protocol: Regeneration of the Native Peptide.....                    | S-60 |
| Synthesis of Fluorescein Tethered Bicyclononyne .....                                        | S-70 |
| Inverse-Electron Demand Diels-Alder of S,S-Tetrazine Somatostatin .....                      | S-72 |
| Tetrazine Stapling of the Thioredoxin Protein.....                                           | S-75 |
| Photochemical Unstapling and Regeneration of the Thioredoxin Protein .....                   | S-77 |
| General Methods for FPLC .....                                                               | S-80 |
| C4-Liquid Chromatography-Mass Spectrometry Separation of Proteins.....                       | S-84 |
| Measurement of Regenerated Thioredoxin Bioactivity.....                                      | S-87 |
| Inverse-Electron Demand Diels-Alder Reaction of Bicyclononyne with Tetrazine Thioredoxin..   | S-88 |
| NMR-Spectra.....                                                                             | S-89 |

## General Methods

**Chemicals.** Organic solvents used for reactions and washes were of reagent grade and degassed by purging with nitrogen prior to use. Di-*tert*-butyldicarbonate (Boc<sub>2</sub>O), diisopropylethylamine (DIPEA), piperidine, Thioredoxin (Trx), were obtained from Aldrich Chemical Co. and used as received. Fmoc-protected amino acids, *O*-(Benzotriazol-1-yl)-*N,N,N',N'*-tetramethyluronium (HBTU), were purchased from Chem-Impex International and used as received. Dichloromethane (CH<sub>2</sub>Cl<sub>2</sub>), dimethylformamide (DMF), methanol (MeOH), trifluoroacetic acid (TFA) were purchased from Fisher Scientific. Ethyl cyanoglyoxylate-2-oxime (oxyma), Rink Novagel<sup>®</sup> resin and 2-chloro-chlorotriyl resin were obtained from Novabiochem. Dichlorotetrazine was synthesized via procedure reported by Coburn, M. D.; Buntain, G. A.; Harris, B. W.; Hiskey, M. A.; Lee, K. Y.; Ott, D. G. *J. Heterocycl. Chem.* **1991**, 28, 2049.

**Reaction Equipment.** Solid-phase syntheses were carried out in peptide synthesis reaction vessels (25 or 50 mL) with coarse porosity fritted glass support and Teflon stopcocks. Photolysis experiments were performed in a Rayonet<sup>™</sup> Srinivasan-Griffin Photoreactor (The Southern New England Ultraviolet Company) using either UV-A lamps (part # LZC-UVA) or UV-B lamps (part # LZC-UVB) purchased from Luzchem.

**Resin Washing Procedures.** Resin washing was conducted with the indicated solvent and was allowed to contact the resin for 30 seconds during each wash. The solvent was pushed through the frit using an “air push” apparatus made from a 15 mL disposable syringe and a 14/20 septum, or nitrogen gas was used in cases when an inert atmosphere is a requirement.

**Chromatography.** Prep-scale reverse-phase chromatography was conducted with a Gilson 215 liquid handler/injector fitted with Gilson 333/334 binary HPLC pumps and UV/vis dual wavelength detector (model 156) and Trilution software. The chromatographies were carried out on a Waters XBridge Prep BEH 130 C18 5μm OBD 19 × 100mm column (part # 186003587). The eluent was acetonitrile (HPLC grade) and Millipore water with 0.1% trifluoroacetic acid buffer unless otherwise noted and gradients specific to the compound.

**Instruments Used for Spectral Data.** <sup>1</sup>H NMR, <sup>13</sup>C NMR and 2D NMR spectra were recorded on a Bruker Avance III equipped with either a 5 mm dual inverse probe or 5 mm DCH CryoProbe. The analytical LC-MS analyses were conducted using a Waters 2767 sample manager, consisting of a Waters 2525 binary gradient HPLC connected to a diode array detector and a Waters Micromass ZQ mass spectrometer with

electro-spray ionization. The LC-MS samples were analyzed as solutions in water or acetonitrile, prepared at 0.15 – 0.20 mg/mL concentration. The LC-MS chromatography was carried out on an Atlantis–C18 column (4.6 ×50 mm; 5 μm) with linear gradients of 0.05% formic acid in acetonitrile and 0.05% formic acid water. High resolution mass spectrometry was obtained on Waters LC-TOF mass spectrometer (model LCT-XE Premier) using electrospray ionization in positive or negative mode, depending upon the analyte. MALDI-MS spectra were collected with a Bruker Ultraflex III TOF/TOF matrix-assisted laser desorption/ionization mass spectrometer. All FTIR spectra were taken on a Nicolet 6700 FTIR spectrometer or PerkinElmer FTIR (model Spectrum BX).

### General Procedures for the Resin Loading

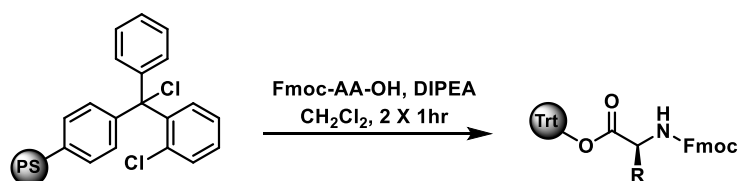

**2-Chlorotrityl Chloride Resin Amino Acid Loading.** 2-Chlorotrityl chloride resin (0.40 mmol) was placed in a peptide synthesis vessel and the resin was swelled in CH<sub>2</sub>Cl<sub>2</sub> (10 mL) for 1 h. The solvent was drained and the resin was then treated with a pre-mixed solution of Fmoc-AA-OH (0.48 mmol, 1.2 equiv), and DIPEA (1.6 mmol, 4 equiv) dissolved in CH<sub>2</sub>Cl<sub>2</sub> (5 mL) was added to the resin. The contents were rocked gently for 1 h, then drained and the resin washed with DMF (3 × 5 mL). The coupling procedure was repeated and the resin carried on to the next step.

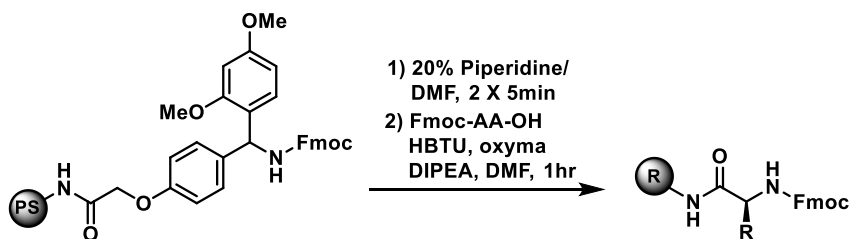

**Rink Resin Amino Acid Loading.** Rink Novagel resin (0.10 mmol) was placed in a peptide synthesis vessel and the resin was swelled in CH<sub>2</sub>Cl<sub>2</sub> (10 mL) for 1 h. The solvent was drained and the resin was washed with DMF (3 × 6 mL) then treated with 20% piperidine/DMF (2 × 6 mL) allowing the solution to contact the resin for 10 minutes. The resin was washed with DMF (5 × 6 mL) and a pre-mixed solution of Fmoc-protected amino acid (0.50 mmol, 5 equiv), HBTU (190 mg, 0.5 mmol, 5 equiv), oxyma (71 mg, 0.5 mmol, 5 equiv) and DIPEA (174 μL, 1.0 mmol, 10 equiv) dissolved in DMF (4 mL) was added to the resin. The contents were rocked gently for 1 h, then drained and the resin washed with DMF (3 × 6 mL).

## General Procedures for Manual Solid-Phase Peptide Synthesis

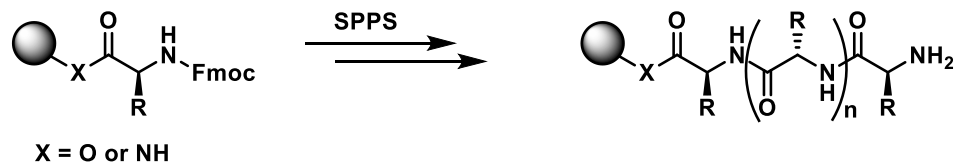

**Solid-Phase Peptide Synthesis (SPPS).** The resin-bound Fmoc-amino acid (0.1 mmol) was washed with DMF ( $3 \times 5$  mL) and then treated with a solution of 20% piperidine/DMF ( $2 \times 6$  mL) allowing each treatment to contact the resin for 5 minutes. The resin was washed with DMF ( $5 \times 6$  mL), then a pre-mixed solution of Fmoc-protected amino acid (0.5 mmol, 5.0 equiv), HBTU (190 mg, 0.5 mmol, 5.0 equiv), oxyma (71 mg, 0.5 mmol, 5.0 equiv) and DIPEA (174  $\mu$ L, 1.0 mmol, 10.0 equiv) dissolved in DMF (4 mL) was added to the resin. The contents were rocked gently for 1 h, then drained and the resin washed with DMF ( $3 \times 5$  mL). The Fmoc deprotection procedure was repeated followed by the coupling of the next amino acid in the sequence to synthesize the desired peptide.

## General Procedures for Peptide Cleavage and Global Deprotection

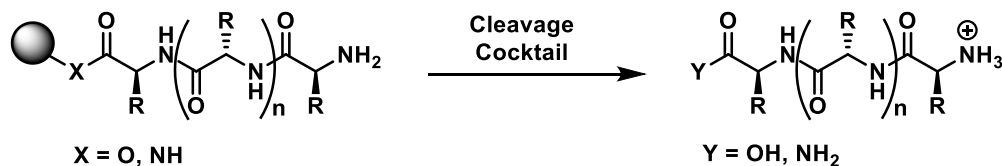

**Cleavage Cocktail A:** TFA/EDT/TIPSH/water (92.5: 2.5: 2.5: 2.5) Peptides with Cys

**Cleavage Cocktail B:** TFA/thioanisole/EDT/water (87.5: 5: 5: 2.5) Peptides with Cys & Trp, Arg

**Cleavage Cocktail C:** TFA/thioanisole/EDT/TIPSH/water (87.5:5:2.5:2.5:2.5) Peptides with Cys & Met

The resin-bound peptide ( $\sim 0.1$  mmol) was pre-swelled in  $\text{CH}_2\text{Cl}_2$  for 30 minutes and then treated with cleavage cocktail A, B or C (7 mL) and stirred under a nitrogen atmosphere for 4 hours. The filtrate was collected and additional cleavage cocktail ( $3 \times 1$  mL) was used to wash the resin. The pooled filtrates were condensed (ca. 1 mL) and  $\text{Et}_2\text{O}$  (15 mL) was added to precipitate the peptide. The white precipitate was collected by vacuum filtration and the solids wash with additional  $\text{Et}_2\text{O}$ . The crude peptide was dried *in vacuo* overnight and purified by reverse-phase high-pressure liquid chromatography (HPLC).

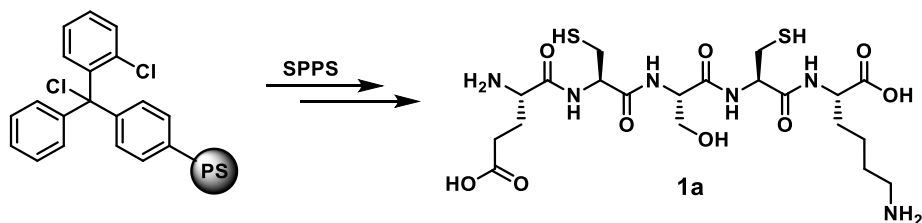

**Peptide 1a**, was constructed by SPPS from 1.0 mmol loaded 2-chloro-chlorotrityl resin. Removal of the peptide from resin was conducted with cocktail A (20 mL) following the general cleavage method. The peptide was purified by reverse-phase HPLC (5 - 15% organic over 5 min) to give 360 mg (45% •2 TFA salt form) of a white amorphous powder after lyophilization: HRMS (ES) found  $m/z$  569.2067 [(M+H)<sup>+</sup>; calcd for C<sub>28</sub>H<sub>37</sub>N<sub>6</sub>O<sub>9</sub>S<sub>2</sub>: 569.2063]; <sup>1</sup>H NMR (500 MHz, D<sub>2</sub>O) δ ppm 1.38 - 1.48 (m, 2 H) 1.68 (quin,  $J = 7.3$  Hz, 2 H) 1.72 - 1.81 (m, 1 H) 1.85 - 1.94 (m, 1 H) 2.19 (q,  $J = 7.3$  Hz, 2 H) 2.55 (t,  $J = 7.3$  Hz, 2 H) 2.90 - 3.02 (m, 6 H) 3.89 (t,  $J = 4.9$  Hz, 2 H) 4.14 (t,  $J = 6.5$  Hz, 1 H) 4.32 (dd,  $J = 8.9, 5.2$  Hz, 1 H) 4.52 (t,  $J = 5.4$  Hz, 1 H) 4.58 (t,  $J = 6.2$  Hz, 1 H) 4.61 (t,  $J = 6.30$  Hz, 1 H); <sup>13</sup>C NMR (126MHz, D<sub>2</sub>O) δ 176.6, 176.2, 171.6, 171.5, 171.4, 169.4, 61.1, 55.8, 55.7, 55.6, 53.4, 52.4, 39.3, 30.3, 29.4, 26.3, 26.1, 25.5, 25.4, 22.2; IR (KBr, cm<sup>-1</sup>) 3425 (br), 3286 (br), 3077 (br), 2950 (br), 1682 (s), 1628(s), 1535 (m), 1429 (m), 1207 (s), 1132 (s).

# Gradient 5-60% MeCN, 7 min, 2mL/min

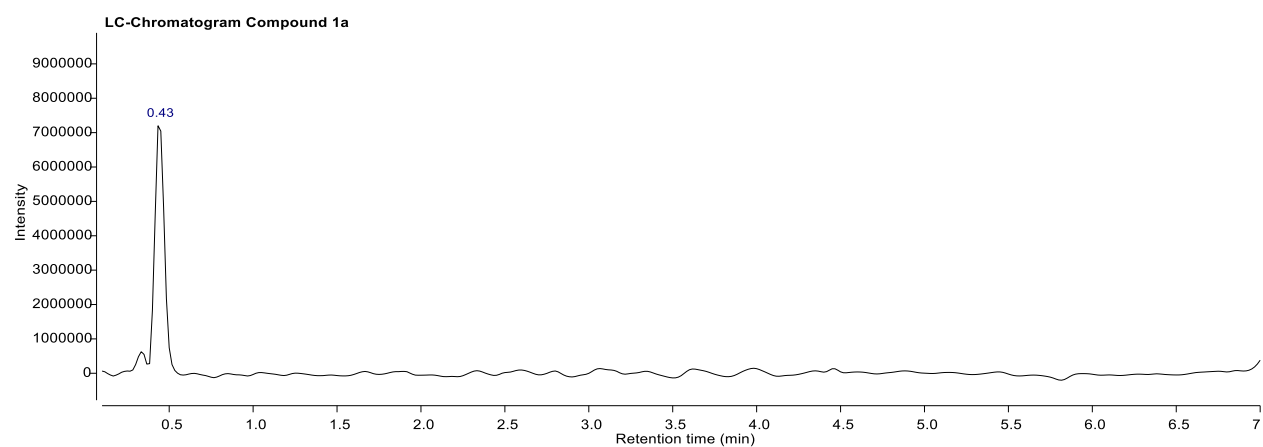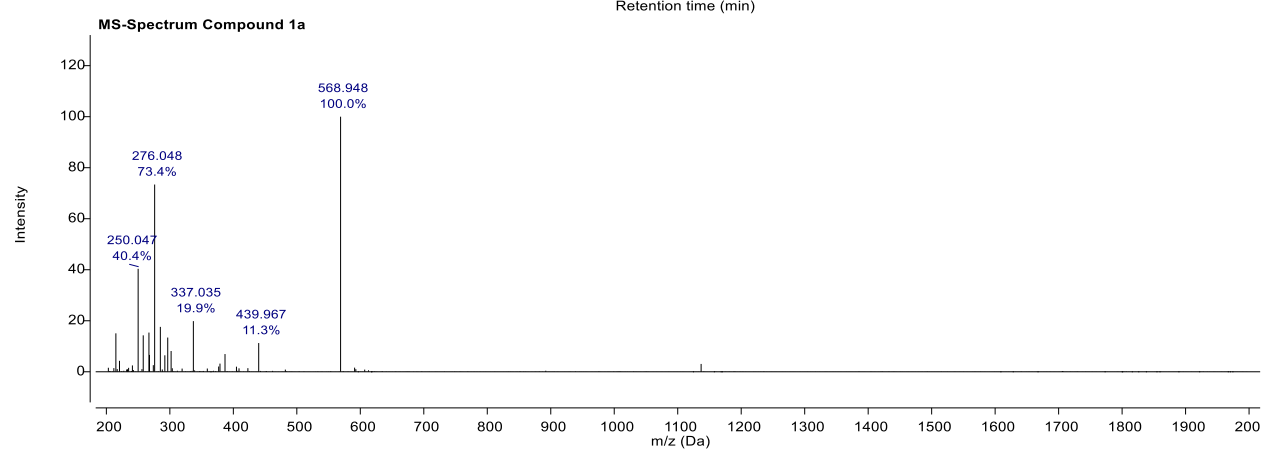

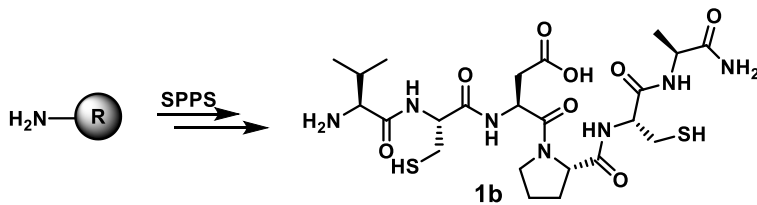

**Peptide 1b** was constructed by SPPS from 0.10 mmol loaded Rink amide resin. Removal of the peptide from resin was conducted with cocktail A following the general cleavage method. The peptide was purified by reverse-phase HPLC (5 - 35% organic over 12 min) to give 46.4 mg (65% • TFA salt form) of a white amorphous powder after lyophilization: HRMS (ES) Found  $m/z$  606.2378 [(M+H)<sup>+</sup>; calcd for C<sub>23</sub>H<sub>40</sub>N<sub>7</sub>O<sub>8</sub>S<sub>2</sub>: 606.2380]; <sup>1</sup>H NMR (500MHz, DMSO-*d*<sub>6</sub>) δ 8.55 (br. s., 1 H), 8.52 (d, *J* = 7.3 Hz, 2 H), 8.08 (d, *J* = 7.3 Hz, 1 H), 7.74 (d, *J* = 7.5 Hz, 1 H), 7.06 (s, 2 H), 7.02 (s, 2 H), 4.78 (q, *J* = 6.9 Hz, 1 H), 4.44 (dd, *J* = 5.4, 11.3 Hz, 1 H), 4.27 (dd, *J* = 3.8, 8.5 Hz, 1 H), 4.23 (dd, *J* = 4.8, 8.1 Hz, 1 H), 4.21 (dd, *J* = 4.8, 8.3 Hz, 1 H), 4.11 (quin, *J* = 7.2 Hz, 1 H), 3.71 (t, *J* = 6.3 Hz, 2 H), 3.55 (d, *J* = 5.5 Hz, 1 H), 2.82 (d, *J* = 4.6 Hz, 1 H), 2.83 (dd, *J* = 4.8, 13.7 Hz, 1 H), 2.76 (br. s., 1 H), 2.77 (dd, *J* = 8.5, 15.0 Hz, 1 H), 2.75 (br. s., 1 H), 2.71 (dd, *J* = 7.1, 16.4 Hz, 1 H), 2.42 (dd, *J* = 6.9, 16.2 Hz, 1 H), 2.11 - 2.00 (m, 2 H), 1.99 - 1.92 (m, 1 H), 1.92 - 1.84 (m, 2 H), 1.23 (d, *J* = 7.1 Hz, 3 H), 0.92 (d, *J* = 6.7 Hz, 3 H), 0.89 (d, *J* = 6.7 Hz, 3 H); <sup>13</sup>C NMR (126 MHz, DMSO-*d*<sub>6</sub>) δ 174.1, 171.9, 171.7, 169.2, 168.9, 167.9, 60.2, 57.2, 55.5, 54.9, 48.3, 47.8, 47.0, 35.6, 29.9, 29.1, 26.3, 25.8, 24.5, 18.4, 18.0, 17.7; IR (KBr, cm<sup>-1</sup>) 3332(br), 3067(m), 2974(m), 1664(vs), 1525(m), 1451(w), 1200(m), 1132(w).



# Gradient 5-60% MeCN, 7 min, 2mL/min

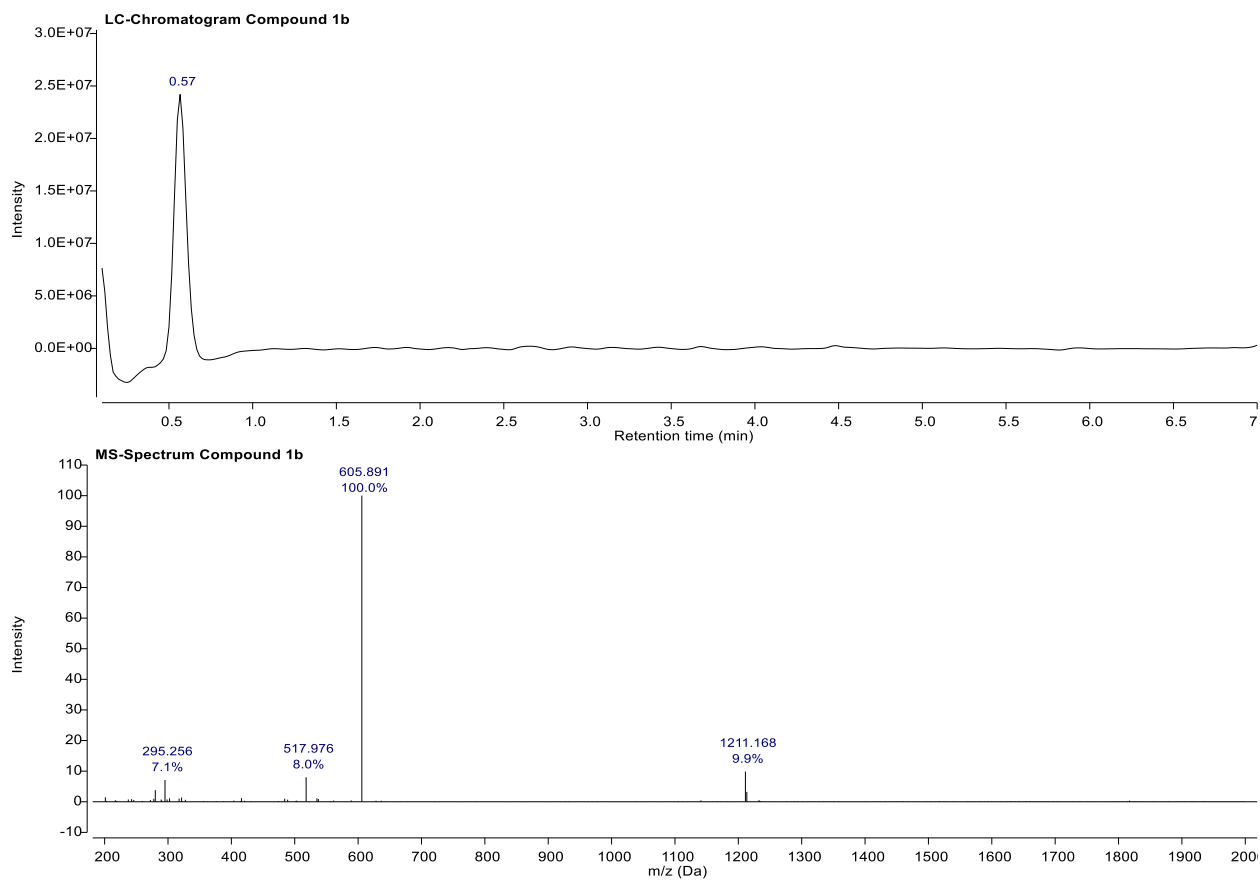

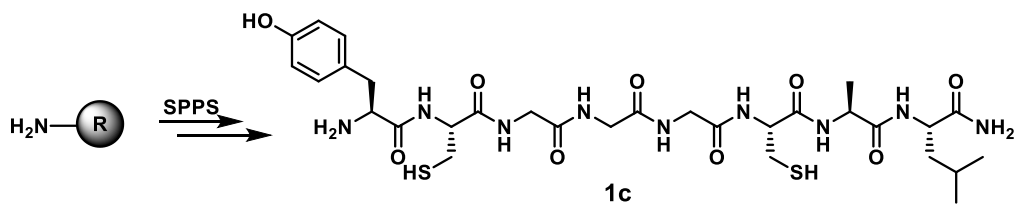

**Peptide 1c** was constructed by SPPS from 0.10 mmol loaded Rink amide resin. Removal of the peptide from resin was conducted with cocktail A following the general cleavage method. The peptide was purified by reverse-phase HPLC (5 - 35% organic over 15 min) to give 39.2 mg (46% • TFA salt form) of a white amorphous powder after lyophilization: HRMS (ES) Found  $m/z$  742.3011 [(M+H)<sup>+</sup>; calcd for C<sub>30</sub>H<sub>48</sub>N<sub>9</sub>O<sub>9</sub>S<sub>2</sub>: 742.3016]; <sup>1</sup>H NMR (500MHz, DMSO-d<sub>6</sub>) δ = 9.37 (br. s., 1 H), 8.82 (d,  $J$  = 7.7 Hz, 1 H), 8.31 (br. t,  $J$  = 5.6 Hz, 2 H), 8.22 (d,  $J$  = 7.1 Hz, 1 H), 8.18 (t,  $J$  = 5.0 Hz, 1 H), 8.10 (d,  $J$  = 7.1 Hz, 2 H), 7.73 (d,  $J$  = 8.1 Hz, 1 H), 7.23 (s, 1 H), 7.05 (d,  $J$  = 8.1 Hz, 2 H), 6.97 (s, 1 H), 6.71 - 6.67 (m,  $J$  = 8.1 Hz, 2 H), 4.49 (dd,  $J$  = 6.7, 13.7 Hz, 1 H), 4.41 (dd,  $J$  = 7.3, 13.1 Hz, 1 H), 4.23 (dd,  $J$  = 7.1, 14.3 Hz, 1 H), 4.19 (dd,  $J$  = 8.1, 15.7 Hz, 1 H), 4.04 (t,  $J$  = 5.9 Hz, 1 H), 3.85 (dd,  $J$  = 5.7, 16.6 Hz, 1 H), 3.77 (d,  $J$  = 5.4 Hz, 6 H), 3.75 (dd,  $J$  = 5.5, 17.0 Hz, 1 H), 3.01 (dd,  $J$  = 5.2, 14.3 Hz, 1 H), 2.85 - 2.74 (m, 4 H), 2.75 - 2.65 (m, 1 H), 2.40 (t,  $J$  = 8.4 Hz, 1 H), 1.58 (quind,  $J$  = 6.6, 13.3 Hz, 1 H), 1.45 (t,  $J$  = 7.2 Hz, 2 H), 1.22 (d,  $J$  = 7.1 Hz, 3 H), 0.87 (d,  $J$  = 6.7 Hz, 3 H), 0.82 (d,  $J$  = 6.5 Hz, 3 H); <sup>13</sup>C NMR (126MHz, DMSO-d<sub>6</sub>) δ 174.0, 171.7, 169.5, 169.3, 169.2, 169.0, 168.9, 168.3, 156.6, 130.5, 124.7, 115.4 (2C), 55.1, 54.9, 53.6, 50.9, 48.7, 42.0, 42.0, 42.0, 41.0, 36.2, 26.2, 26.2, 24.2, 23.1, 21.6, 17.6; IR (KBr, cm<sup>-1</sup>) 3306(br), 2957(m), 1661(vs), 1518(s), 1202(m), 1136(w).

**Gradient 5-60% MeCN, 7 min, 2mL/min**

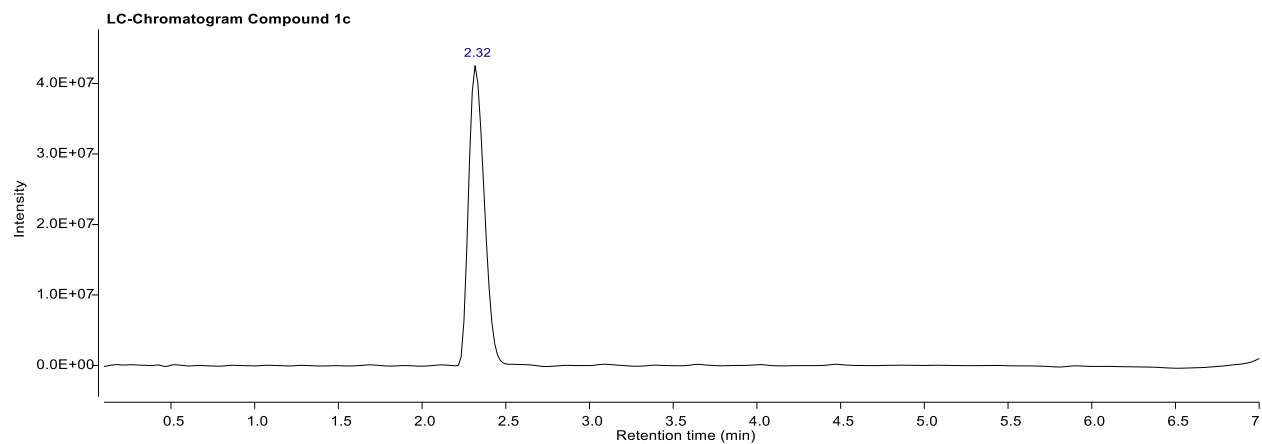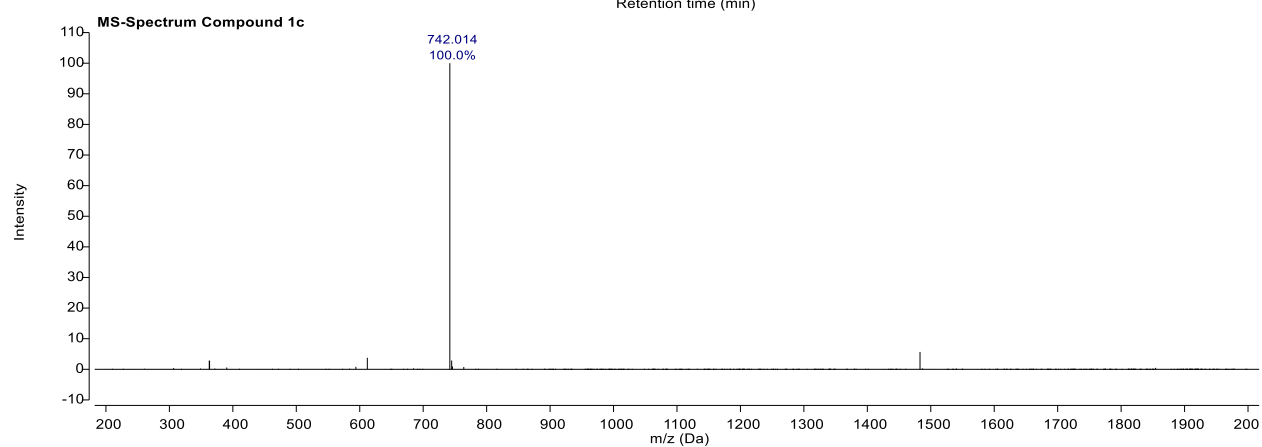

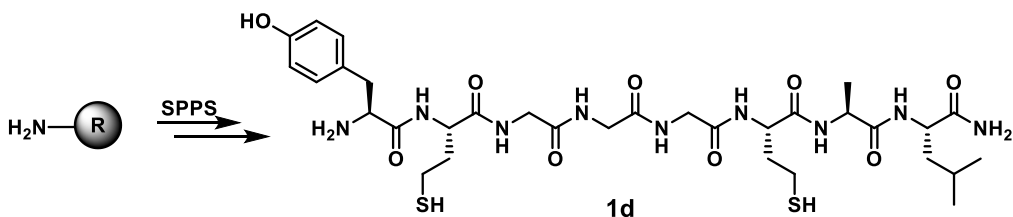

**Peptide 1d** was constructed by SPPS from 0.10 mmol loaded Rink amide resin. Removal of the peptide from resin was conducted with cocktail A following the general cleavage method. The peptide was purified by reverse-phase HPLC (5 - 35% organic over 15 min) to give 43.8 mg (50% • TFA salt form) of a white amorphous powder after lyophilization: HRMS (ES) Found  $m/z$  770.3336 [(M+H)<sup>+</sup>; calcd for C<sub>40</sub>H<sub>48</sub>N<sub>7</sub>O<sub>7</sub>S<sub>2</sub>: 770.3336]; <sup>1</sup>H NMR (500 MHz, DMSO-*d*<sub>6</sub>) δ 9.33 (s, 1H), 8.67 (d, *J* = 8.0 Hz, 1H), 8.18 (t, *J* = 5.8 Hz, 1H), 8.14 (q, *J* = 5.5 Hz, 2H), 8.09 (d, *J* = 7.2 Hz, 1H), 8.06 – 7.98 (m, 3H), 7.69 (d, *J* = 8.4 Hz, 1H), 7.22 (s, 1H), 7.03 (d, *J* = 8.5 Hz, 2H), 6.94 (s, 1H), 6.69 (d, *J* = 8.5 Hz, 2H), 4.47 (ddd, *J* = 8.2, 5.3 Hz, 1H), 4.38 (ddd, *J* = 8.3, 5.1 Hz, 1H), 4.28 – 4.13 (m, 2H), 4.02 – 3.93 (m, 1H), 3.83 (dd, *J* = 16.6, 5.8 Hz, 1H), 3.79 – 3.68 (m, 4H), 2.99 (dd, *J* = 14.2, 5.4 Hz, 1H), 2.79 (dd, *J* = 13.8, 8.5 Hz, 1H), 2.68 (s, 0H), 2.48 – 2.40 (m, 2H), 2.37 (t, *J* = 8.0 Hz, 1H), 2.29 (t, *J* = 8.0 Hz, 1H), 2.08 – 1.74 (m, 4H), 1.58 (dt, *J* = 13.4, 6.7 Hz, 1H), 1.45 (dd, *J* = 8.4, 6.2 Hz, 2H), 1.21 (d, *J* = 7.1 Hz, 3H), 0.88 (d, *J* = 6.6 Hz, 3H), 0.83 (d, *J* = 6.5 Hz, 3H); <sup>13</sup>C NMR (126 MHz, DMSO) δ 173.9, 171.7, 170.7, 170.5, 169.1, 168.9, 168.8, 168.1, 156.5, 130.4, 124.7, 115.3, 53.6, 51.7, 51.5, 50.8, 48.4, 42.0, 41.9, 41.0, 36.8, 36.5, 36.1, 24.2, 23.0, 21.6, 20.3, 20.2, 17.6; IR (KBr, cm<sup>-1</sup>) 3309(br), 2956(m), 1662(vs), 1515(s), 1202(m), 1136(w).

# Gradient 5-60% MeCN, 7 min, 2mL/min

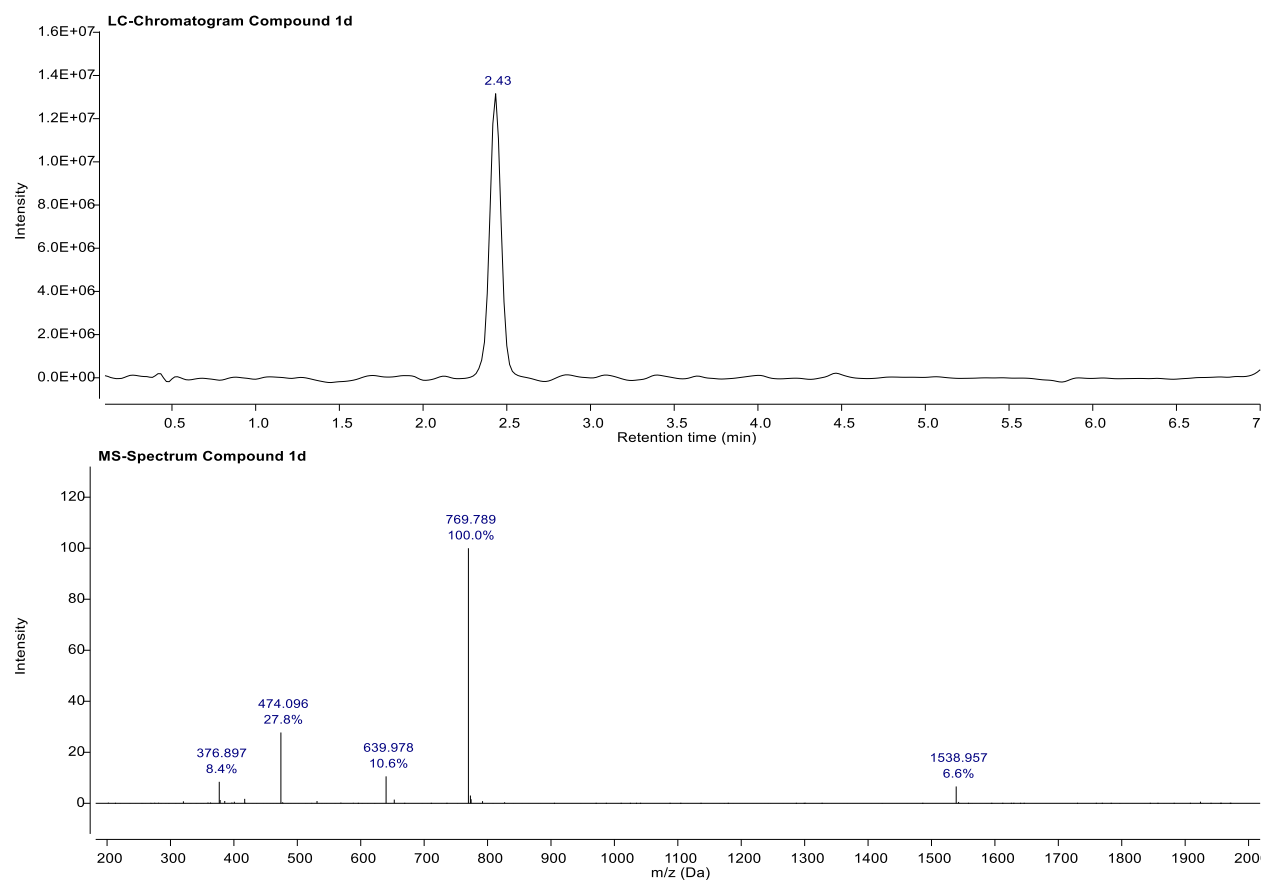

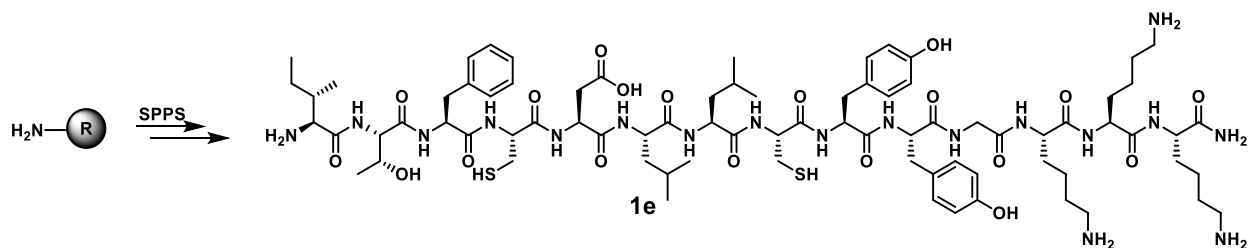

**Peptide 1e** was constructed by SPPS from 0.10 mmol loaded Rink amide resin. Removal of the peptide from resin was conducted with cocktail A following the general cleavage method. The peptide was purified by reverse-phase HPLC [eluent water/MeCN/AcOH (85:10:5) and MeCN (organic) buffered with 0.1%TFA] (5 - 40% organic over 15 min) to give 49.5 mg (23% • 4 TFA salt form) of a white amorphous powder after lyophilization: MALDI-TOF Found  $m/z$  1694.004 [(M+H)<sup>+</sup>; calcd for C<sub>79</sub>H<sub>125</sub>N<sub>18</sub>O<sub>19</sub>S<sub>2</sub>: 1693.880]; <sup>1</sup>H NMR (500 MHz, DMSO-*d*<sub>6</sub>) δ 12.45 (s, 1H), 9.21 (d, *J* = 15.0 Hz, 2H), 8.43 (d, *J* = 7.5 Hz, 1H), 8.31 (dd, *J* = 8.2, 3.8 Hz, 2H), 8.16 – 7.87 (m, 13H), 7.85 (d, *J* = 7.9 Hz, 2H), 7.81 – 7.62 (m, 13H), 7.39 (s, 1H), 7.25 – 7.18 (m, 4H), 7.18 – 7.12 (m, 1H), 7.06 (s, 1H), 7.01 (d, *J* = 8.5 Hz, 2H), 6.93 (d, *J* = 8.3 Hz, 2H), 6.63 (d, *J* = 8.3 Hz, 2H), 6.60 (d, *J* = 8.5 Hz, 2H), 5.00 (d, *J* = 4.4 Hz, 1H), 4.62 (dq, *J* = 7.9, 4.7 Hz, 1H), 4.57 (q, *J* = 7.1 Hz, 1H), 4.41 (q, *J* = 7.2 Hz, 2H), 4.38 – 4.23 (m, 6H), 4.20 (q, *J* = 7.7 Hz, 1H), 4.18 – 4.08 (m, 1H), 3.93 (q, *J* = 4.9 Hz, 1H), 3.82 – 3.64 (m, 3H), 3.05 (dd, *J* = 14.2, 3.9 Hz, 1H), 2.90 (dd, *J* = 14.0, 3.2 Hz, 1H), 2.82 (t, *J* = 7.1 Hz, 2H), 2.79 – 2.56 (m, 15H), 2.38 (t, *J* = 8.6 Hz, 1H), 2.21 (t, *J* = 8.5 Hz, 1H), 1.79 – 1.55 (m, 7H), 1.56 – 1.47 (m, 11H), 1.47 – 1.37 (m, 5H), 1.37 – 1.23 (m, 3H), 1.24 – 1.19 (m, 1H), 1.05 (d, *J* = 6.3 Hz, 4H), 0.86 (t, *J* = 6.7 Hz, 7H), 0.83 – 0.74 (m, 13H); <sup>13</sup>C NMR (126 MHz, DMSO-*d*<sub>6</sub>) δ 173.4 , 172.1 , 171.7 , 171.6 , 171.4 , 171.3 , 170.9 , 170.9 , 170.4 , 169.6 , 168.7 , 167.9 , 155.9 , 155.8 , 137.5 , 130.1 , 130.0 , 129.1 , 128.0 , 126.2 , 118.5 , 114.9 , 114.9 , 66.9 , 57.9 , 56.3 , 55.0 , 54.5 , 54.3 , 53.6 , 52.5 , 52.2 , 52.1 , 51.2 , 49.7 , 40.7 , 40.3 , 39.3 , 39.1 , 38.8 , 38.7 , 38.7 , 36.3 , 31.5 , 31.2 , 26.7 , 26.6 , 26.4 , 24.1 , 24.0 , 23.8 , 23.2 , 23.1 , 22.3 , 22.3 , 21.6 , 21.5 , 19.3 , 14.5 , 11.1; IR (KBr, cm<sup>-1</sup>) 3285(br), 3080(br), 2960(m), 1676(s), 1634(s), 1516(m), 1203(m), 1137(m).

# Gradient 5-60% MeCN, 10 min, 2mL/min

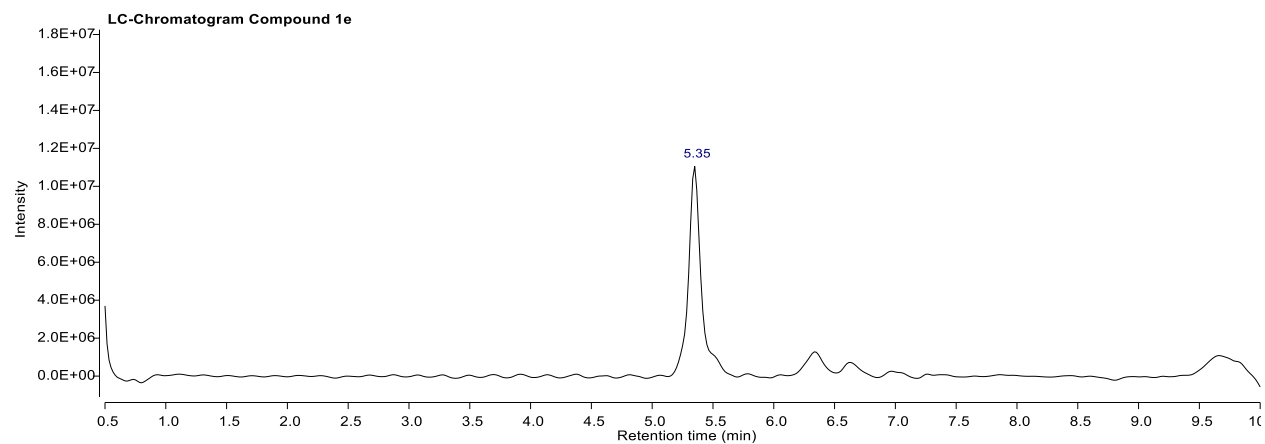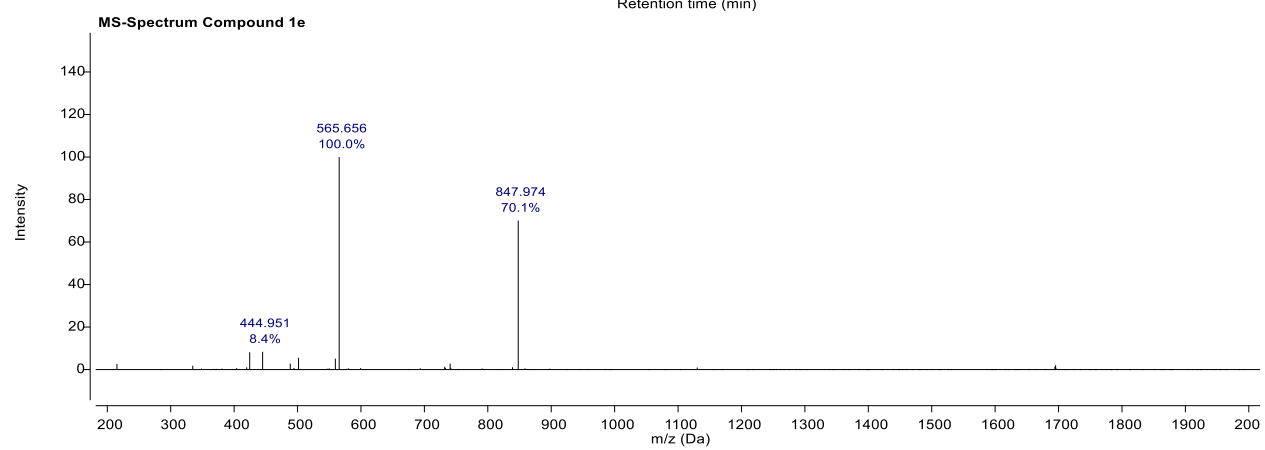

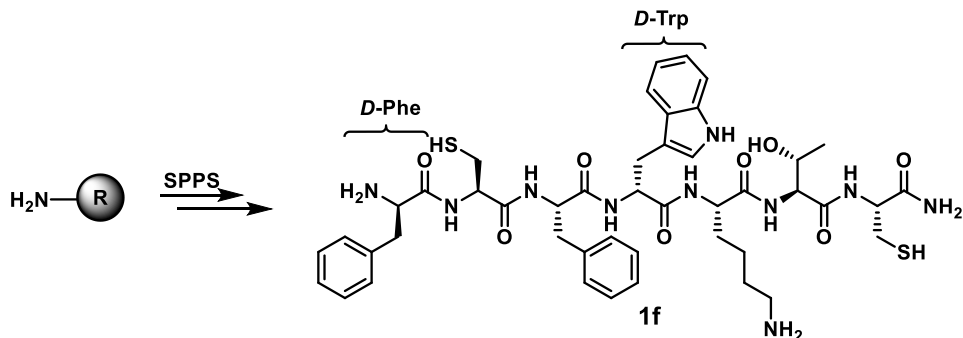

**Peptide 1f** was constructed by SPPS from 0.10 mmol loaded Rink amide resin. Removal of the peptide from resin was conducted with cocktail B following the general cleavage method. The peptide was purified by reverse-phase HPLC (5 - 60% organic over 12 min) to give 45.6 mg (44% • TFA salt form) of a white amorphous powder after lyophilization: HRMS (ES) Found  $m/z$  933.4111 [(M+H)<sup>+</sup>; calcd for C<sub>45</sub>H<sub>61</sub>N<sub>10</sub>O<sub>8</sub>S<sub>2</sub>: 933.4115]; <sup>1</sup>H NMR (500 MHz, DMSO-*d*<sub>6</sub>) δ 10.81 (s, 1H), 8.63 (d, *J* = 8.0 Hz, 1H), 8.33 (d, *J* = 8.3 Hz, 1H), 8.28 (d, *J* = 8.1 Hz, 1H), 8.17 (d, *J* = 8.0 Hz, 1H), 8.15 (s, 2H), 7.99 (d, *J* = 8.0 Hz, 1H), 7.85 (d, *J* = 8.0 Hz, 1H), 7.71 (s, 2H), 7.66 (d, *J* = 7.9 Hz, 1H), 7.39 (s, 1H), 7.36 – 7.23 (m, 5H), 7.15 (d, *J* = 2.4 Hz, 1H), 7.11 (dt, *J* = 4.9, 1.7 Hz, 2H), 7.06 – 7.01 (m, 3H), 7.01 – 6.94 (m, 1H), 4.68 (ddd, *J* = 8.4, 5.8 Hz, 1H), 4.54 (ddd, *J* = 8.6, 4.3 Hz, 1H), 4.42 (q, *J* = 6.5 Hz, 1H), 4.36 (dp, *J* = 10.5, 5.6, 4.9 Hz, 2H), 4.23 (dd, *J* = 7.9, 4.3 Hz, 1H), 4.17 – 4.10 (m, 1H), 4.03 (dd, *J* = 6.5, 4.5 Hz, 1H), 3.11 – 3.02 (m, 2H), 2.96 (dd, *J* = 14.0, 7.8 Hz, 1H), 2.92 – 2.81 (m, 2H), 2.81 – 2.72 (m, 2H), 2.72 – 2.64 (m, 2H), 2.54 (t, *J* = 7.9 Hz, 1H), 2.29 (t, *J* = 8.5 Hz, 1H), 2.02 (t, *J* = 8.6 Hz, 1H), 1.63 (td, *J* = 13.3, 6.9 Hz, 1H), 1.53 – 1.36 (m, 3H), 1.13 (p, *J* = 7.4 Hz, 2H), 1.05 (d, *J* = 6.3 Hz, 3H); <sup>13</sup>C NMR (126 MHz, DMSO) δ 171.8, 171.4, 171.3, 170.3, 169.8, 168.8, 168.0, 137.5, 136.1, 134.8, 129.5, 129.5, 129.2, 128.5, 127.9, 127.2, 127.2, 126.1, 123.9, 120.8, 118.6, 118.1, 111.2, 109.7, 66.3, 58.3, 54.6, 54.5, 54.0, 53.3, 53.2, 52.1, 38.7, 37.3, 37.3, 31.3, 28.7, 26.7, 26.6, 26.1, 22.0, 19.5; IR (KBr, cm<sup>-1</sup>) 3281(br), 2928(w), 1671(s), 1523(m), 1202(m).



# Gradient 5-60% MeCN, 15 min, 2mL/min

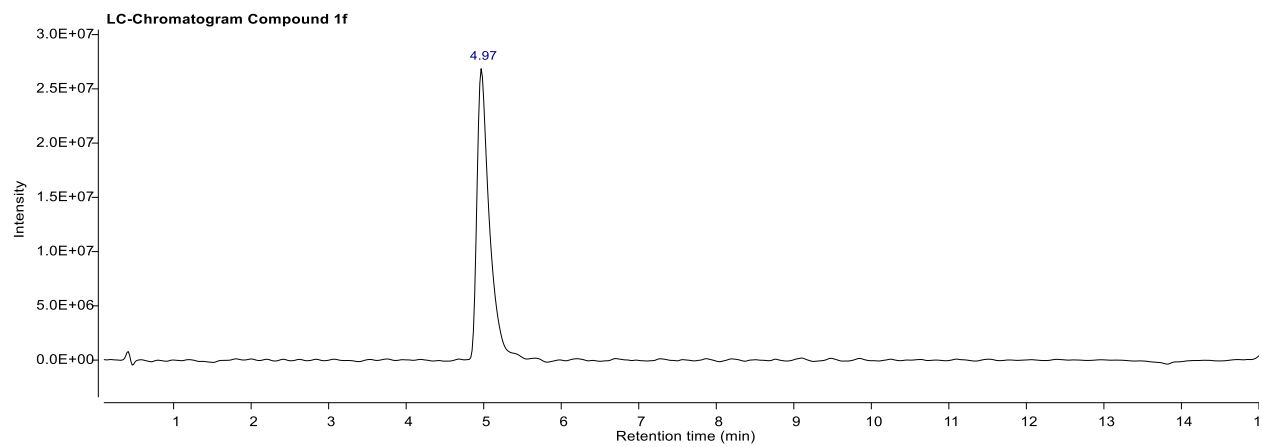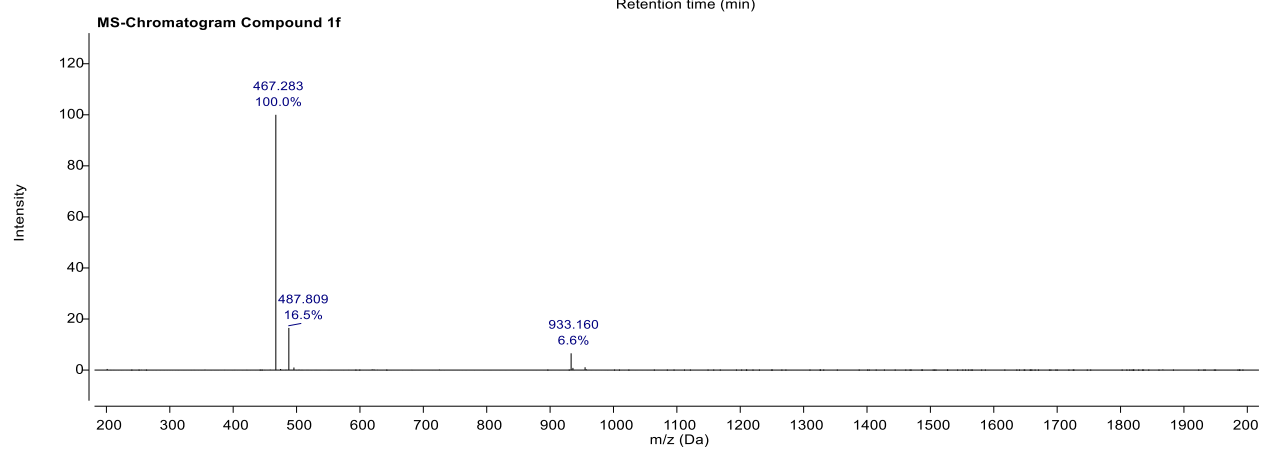

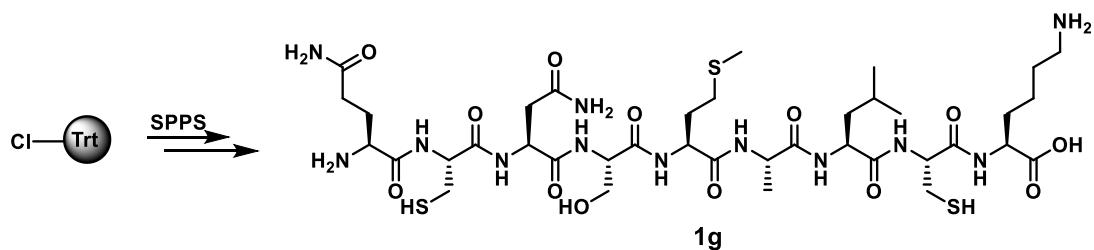

**Peptide 1g** was constructed by SPPS from 0.20 mmol loaded 2-chloro-chlorotriyl resin. Removal of the peptide from resin was conducted with cocktail C following the general cleavage method. The peptide was purified by reverse-phase HPLC (5 - 60% organic over 15 min) to give 124 mg (51% • 2 TFA salt form) of a white amorphous powder after lyophilization: HRMS (ES) Found  $m/z$  997.4268 [(M+H)<sup>+</sup>; calcd for C<sub>38</sub>H<sub>69</sub>N<sub>12</sub>O<sub>13</sub>S<sub>3</sub>: 997.4269]; <sup>1</sup>H NMR (500 MHz, DMSO-*d*<sub>6</sub>) δ 8.8 (d,  $J$  = 7.9 Hz, 1H), 8.5 (d,  $J$  = 7.4 Hz, 1H), 8.2 (s, 3H), 8.2 (d,  $J$  = 7.6 Hz, 1H), 8.1 (d,  $J$  = 7.7 Hz, 1H), 8.1 (d,  $J$  = 6.9 Hz, 1H), 7.9 (d,  $J$  = 7.1 Hz, 1H), 7.9 (dd,  $J$  = 8.0, 2.4 Hz, 2H), 7.8 (s, 3H), 7.5 (d,  $J$  = 26.5 Hz, 2H), 7.0 (d,  $J$  = 30.5 Hz, 2H), 5.1 (s, 1H), 4.6 (q,  $J$  = 7.1 Hz, 1H), 4.5 (td,  $J$  = 7.5, 5.3 Hz, 1H), 4.4 (td,  $J$  = 7.7, 5.0 Hz, 1H), 4.3 (ddd,  $J$  = 13.6, 9.1, 4.8 Hz, 1H), 4.3 (d,  $J$  = 7.6 Hz, 1H), 4.2 – 4.2 (m, 2H), 4.1 (td,  $J$  = 8.5, 4.7 Hz, 1H), 3.9 (s, 1H), 3.6 (s, 1H), 3.6 (s, 1H), 2.9 – 2.7 (m, 7H), 2.6 (dd,  $J$  = 15.5, 6.1 Hz, 1H), 2.5 (d,  $J$  = 1.8 Hz, 10H), 2.5 – 2.4 (m, 3H), 2.3 (t,  $J$  = 8.6 Hz, 1H), 2.2 (dd,  $J$  = 9.1, 6.5 Hz, 2H), 2.0 (s, 3H), 2.0 – 1.9 (m, 3H), 1.9 – 1.8 (m, 1H), 1.8 – 1.7 (m, 1H), 1.6 (dt,  $J$  = 11.3, 5.5 Hz, 2H), 1.6 – 1.5 (m, 2H), 1.5 (t,  $J$  = 7.3 Hz, 2H), 1.3 (q,  $J$  = 8.2 Hz, 2H), 1.2 (d,  $J$  = 7.1 Hz, 3H), 0.9 (d,  $J$  = 6.5 Hz, 3H), 0.8 (d,  $J$  = 6.5 Hz, 3H); <sup>13</sup>C NMR (126 MHz, DMSO-*d*<sub>6</sub>) δ 173.5, 173.4, 172.1, 172.0, 171.6, 171.3, 171.0, 170.3, 169.7, 169.2, 168.5, 61.4, 55.7, 55.0, 54.7, 52.1, 51.8, 51.8, 51.1, 49.9, 48.4, 40.5, 38.6, 37.0, 31.3, 30.3, 30.3, 29.6, 27.0, 26.6, 26.4, 26.4, 24.1, 23.2, 22.4, 21.5, 17.6, 14.7; IR (KBr, cm<sup>-1</sup>) 3286(br), 3078(w), 2960(w), 1664(s), 1635(s), 1541(m), 1202(m), 1137(w), 1033(m), 1008(m).

**Gradient 5-60% MeCN, 15 min, 2mL/min**

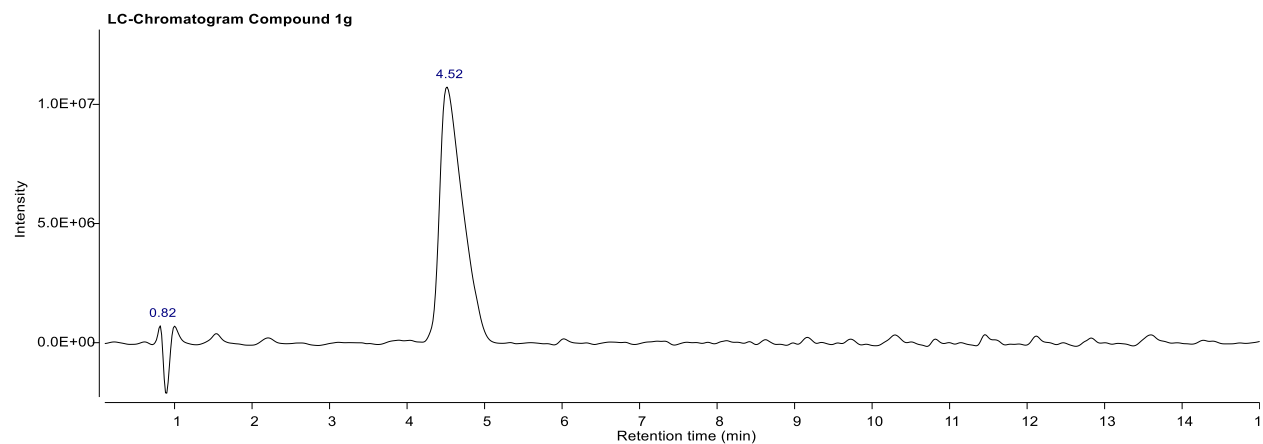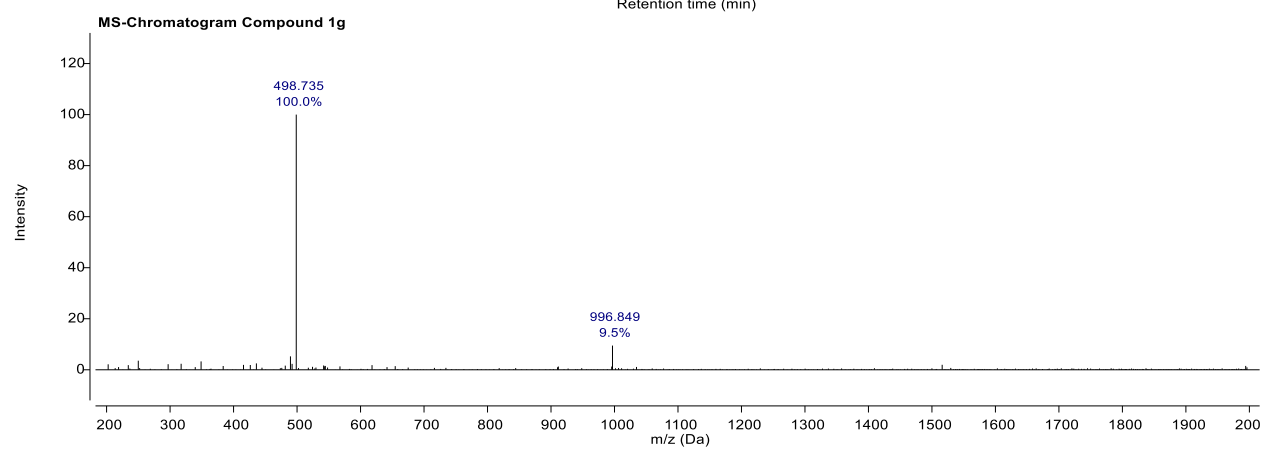

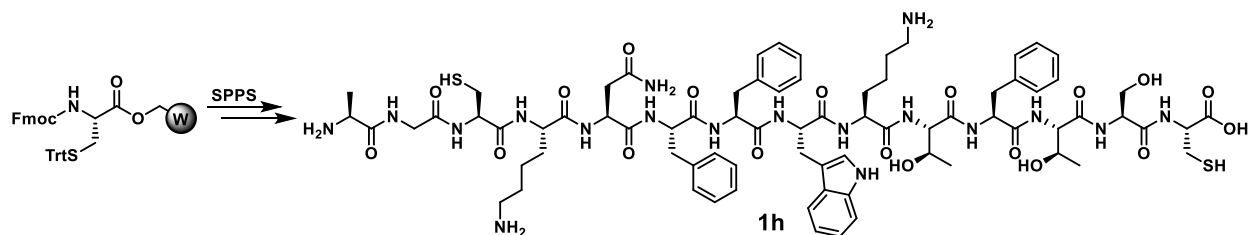

**Peptide 1h** was constructed by automated SPPS from 0.10 mmol pre-loaded Fmoc-Cys(Trt)-Wang resin. Removal of the peptide from resin was conducted with cocktail B following the general cleavage method. The peptide was purified by reverse-phase HPLC (10 - 60% organic over 15 min) to give 38 mg (19% • 3 TFA salt form) of a white amorphous powder after lyophilization: MALDI-TOF Found  $m/z$  1639.125  $[(M+H)^+]$ ; calcd for  $C_{76}H_{107}N_{18}O_{19}S_2$ : 1639.740];  $^1H$  NMR (500 MHz, DMSO- $d_6$ )  $\delta$  10.79 (s, 1H), 8.67 (t,  $J$  = 5.8 Hz, 1H), 8.28 – 8.01 (m, 8H), 8.01 – 7.87 (m, 4H), 7.84 – 7.64 (m, 7H), 7.61 (d,  $J$  = 7.9 Hz, 1H), 7.47 (s, 1H), 7.32 (d,  $J$  = 8.0 Hz, 1H), 7.28 – 7.13 (m, 13H), 7.13 – 7.08 (m, 5H), 7.08 – 7.01 (m, 2H), 6.98 (t,  $J$  = 7.4 Hz, 1H), 6.60 (s, 1H), 5.17 – 5.07 (m, 1H), 4.90 (d,  $J$  = 5.0 Hz, 1H), 4.71 – 4.62 (m, 1H), 4.57 (q,  $J$  = 7.4 Hz, 1H), 4.51 (q,  $J$  = 6.8 Hz, 2H), 4.48 – 4.41 (m, 3H), 4.41 – 4.30 (m, 5H), 4.25 – 4.15 (m, 2H), 4.05 – 3.93 (m, 3H), 3.94 – 3.86 (m, 2H), 3.82 (dd,  $J$  = 16.8, 5.6 Hz, 1H), 3.72 – 3.54 (m, 4H), 3.50 (s, 1H), 3.18 – 3.11 (m, 2H), 3.11 – 3.05 (m, 2H), 3.03 – 2.93 (m, 3H), 2.93 – 2.75 (m, 7H), 2.75 – 2.62 (m, 7H), 2.45 – 2.39 (m, 1H), 2.36 (dd,  $J$  = 15.5, 6.3 Hz, 1H), 1.71 – 1.56 (m, 3H), 1.56 – 1.39 (m, 8H), 1.35 (d,  $J$  = 7.0 Hz, 3H), 1.32 – 1.16 (m, 5H), 1.14 (d,  $J$  = 6.8 Hz, 1H), 1.04 (d,  $J$  = 6.3 Hz, 3H), 0.99 (d,  $J$  = 6.2 Hz, 3H);  $^{13}C$  NMR (126 MHz, DMSO- $d_6$ )  $\delta$  171.8, 171.4, 171.4, 171.2, 171.1, 171.0, 170.9, 170.7, 170.5, 169.9, 169.8, 169.7, 169.7, 169.7, 168.4, 137.8, 137.6, 137.6, 136.1, 129.3, 129.3, 129.1, 128.1, 128.0, 128.0, 127.4, 126.2, 126.2, 123.7, 120.9, 118.3, 109.9, 72.5, 70.6, 70.5, 69.8, 66.8, 66.5, 63.1, 61.8, 61.6, 57.9, 57.9, 57.8, 57.8, 55.0, 54.6, 54.1, 53.9, 53.7, 53.4, 52.4, 52.3, 49.6, 48.2, 41.8, 37.4, 37.2, 37.1, 31.3, 31.2, 27.7, 26.7, 26.7, 26.6, 25.6, 22.3, 22.2, 19.4, 19.3, 19.3, 17.3; IR (KBr,  $cm^{-1}$ ) 3399(br), 3298(br), 3063(w), 2929(w), 1663(s), 1553(m), 1202(w), 1134(w), 1032(w), 1008(w).

# Gradient 5-60% MeCN, 10 min, 2mL/min

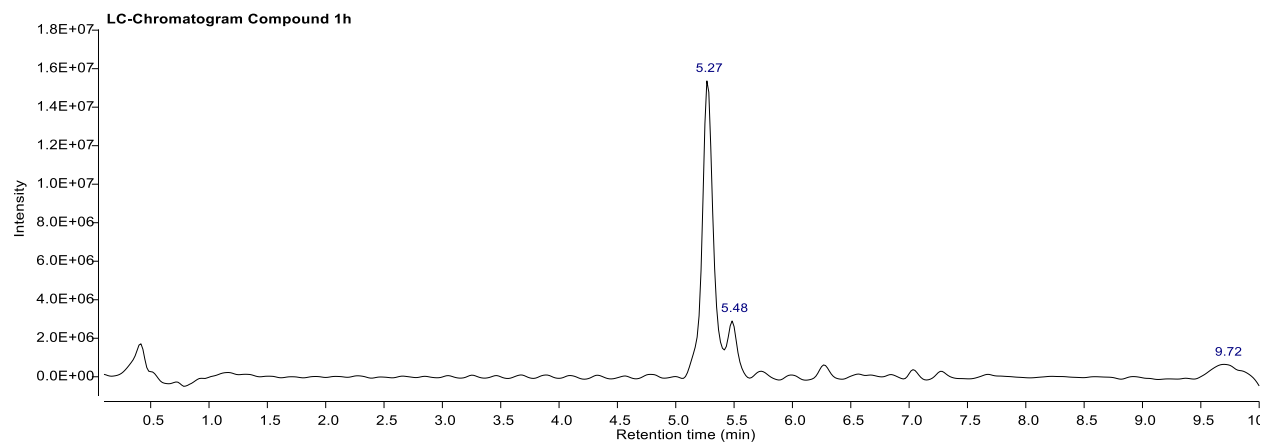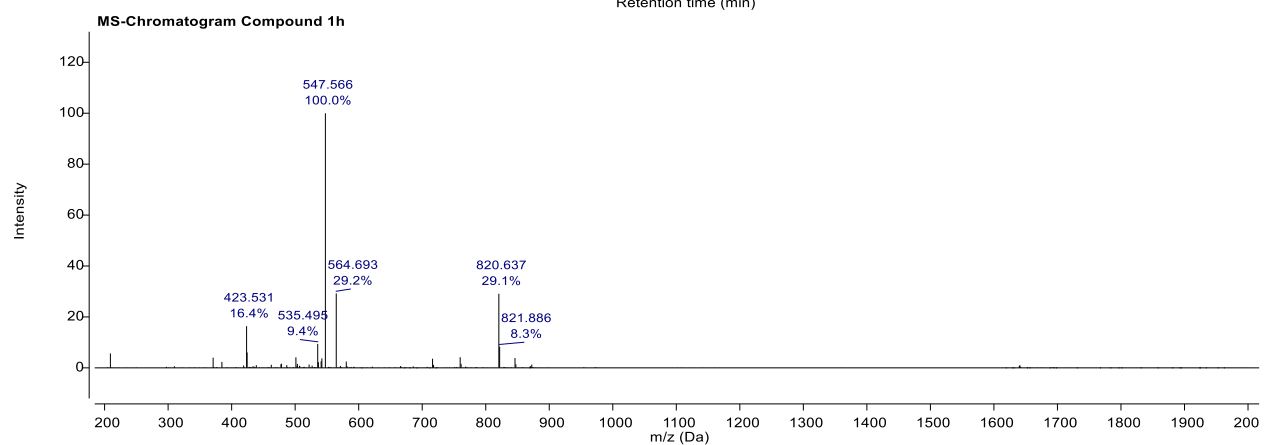

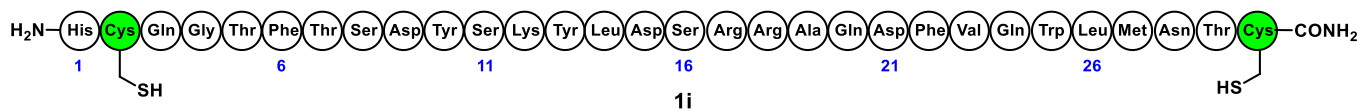

**Peptide 1i** was constructed by automated SPPS from 0.10 mmol loaded Rink amide resin. Removal of the peptide from resin was conducted with cocktail B following the general cleavage method. The peptide was purified by reverse-phase HPLC (10 - 60% organic over 20 min) to give 39.6 mg (11% • 4 TFA salt form) of a white amorphous powder after lyophilization: MALDI-TOF Found  $m/z$  3600.001 [(M+H)<sup>+</sup>; calcd for C<sub>156</sub>H<sub>231</sub>N<sub>45</sub>O<sub>48</sub>S<sub>3</sub>: 3599.625]; IR (KBr, cm<sup>-1</sup>) 3306(br), 2933(w), 1655(s), 1541(m), 1202(m).

**Gradient 5-60% MeCN, 15 min, 2mL/min**

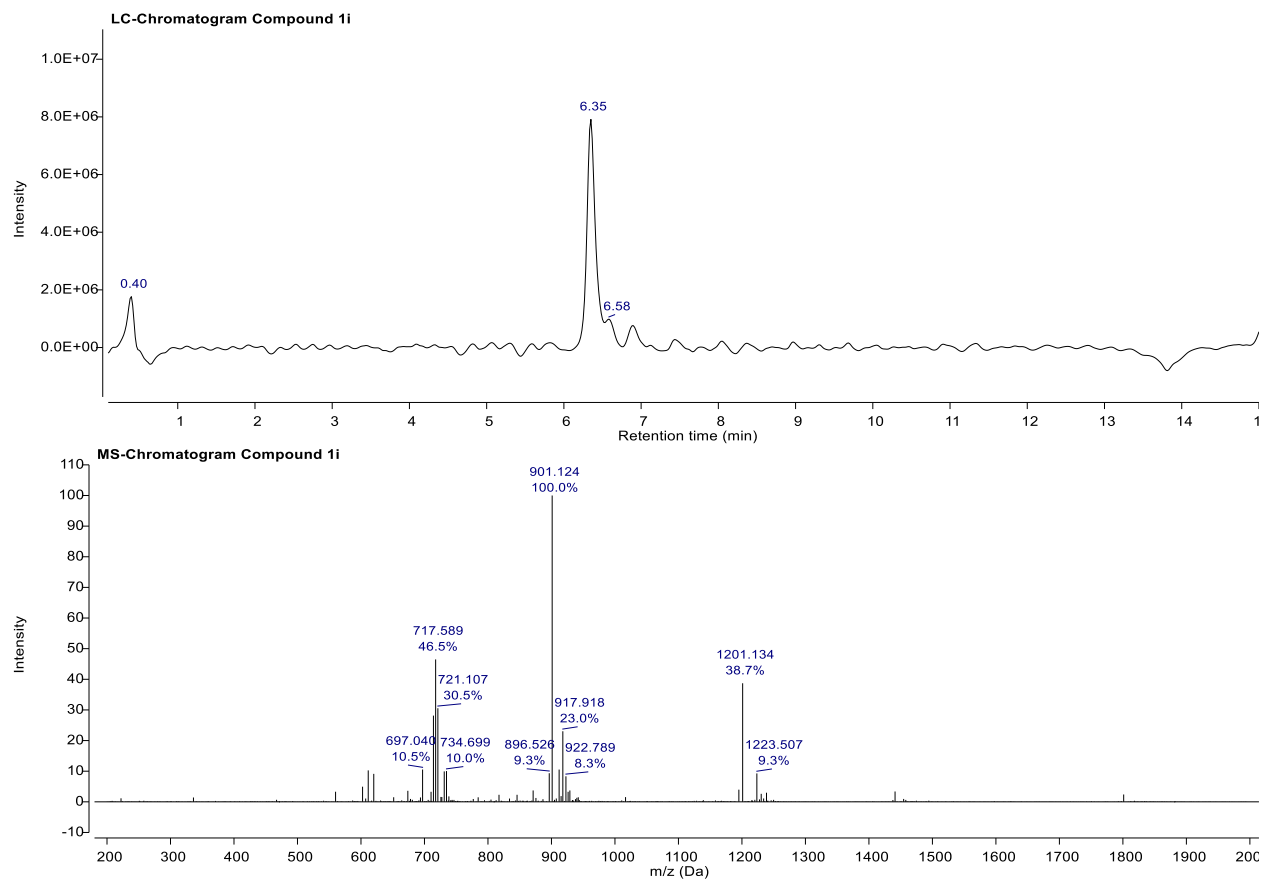

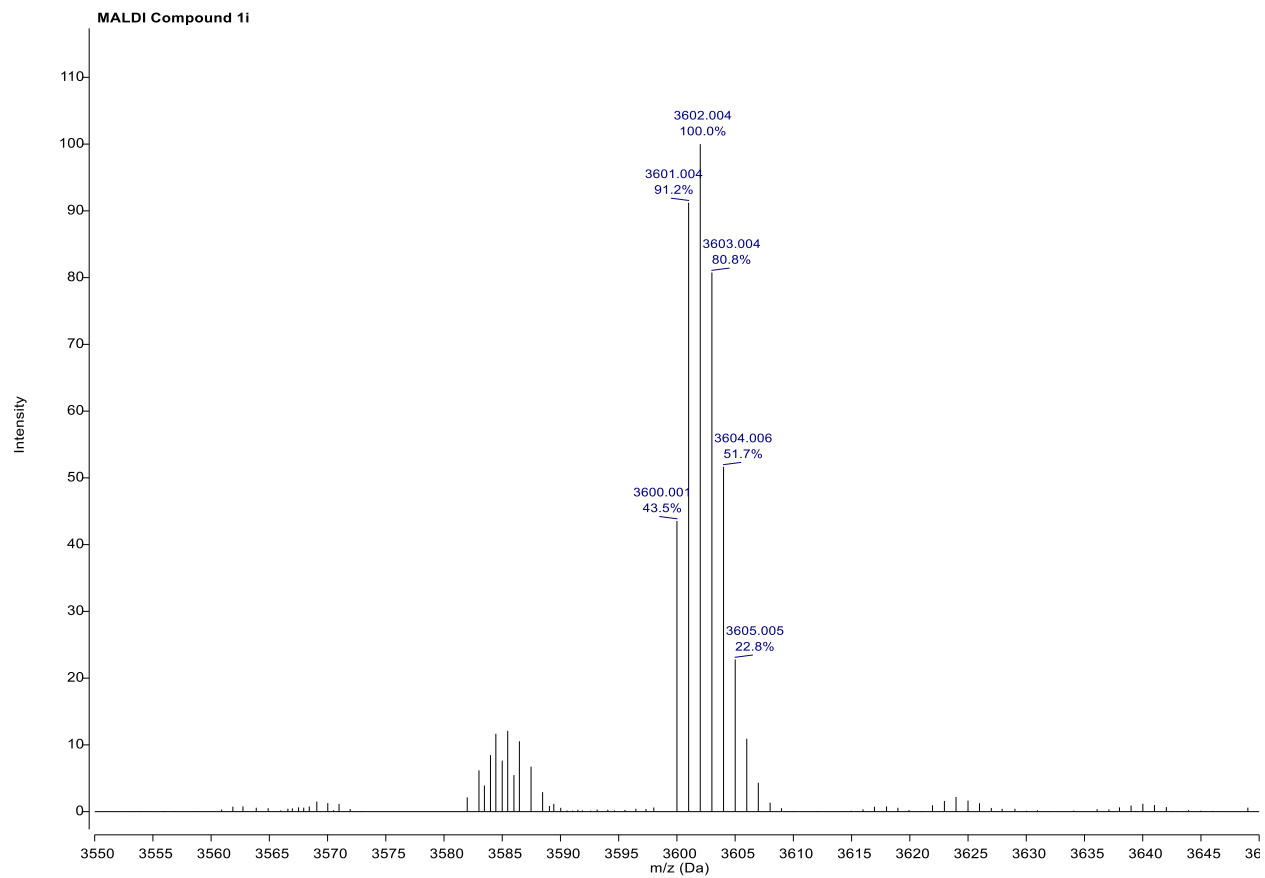

## General Phase-Transfer Protocol for Tetrazine Insertion

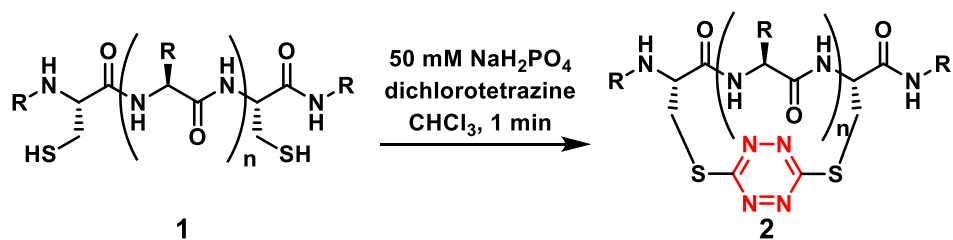

A round bottom flask, was charged with unprotected peptide **1** (1 - 1000  $\mu$ mol) then sealed with a septum and purged with argon. Next, a degassed solution of 50mM (pH ~5) monosodium phosphate was added (1 -2 mM concentration of peptide in solution) followed by a solution of dichlorotetrazine (3 equiv) in CHCl<sub>3</sub> (equal volume to peptide). The two-phases were stirred vigorously for 1 minute. The mixture was divide between Falcon tubes then transferred to a benchtop centrifuge and further separated at 2500 RPM for 1 minute. The aqueous phase, now orange in color, was collected and each organic layer was extracted with an additional portion of water then transferred to a benchtop centrifuge and separated again at 2500 RPM for 1 minute. All of the aqueous fractions were combined and lyophilized. The crude mixture was then purified by reverse-phase high-pressure liquid chromatography (HPLC) to yield an orange powder after lyophilization. **Note:** peptide masses were calculated as the salt free form; quantities of starting material and yields may vary slightly due to the TFA counterion(s).

## Colorimetric Change that Occurs After Mixing the Biphasic Mixture for 1 Minute.

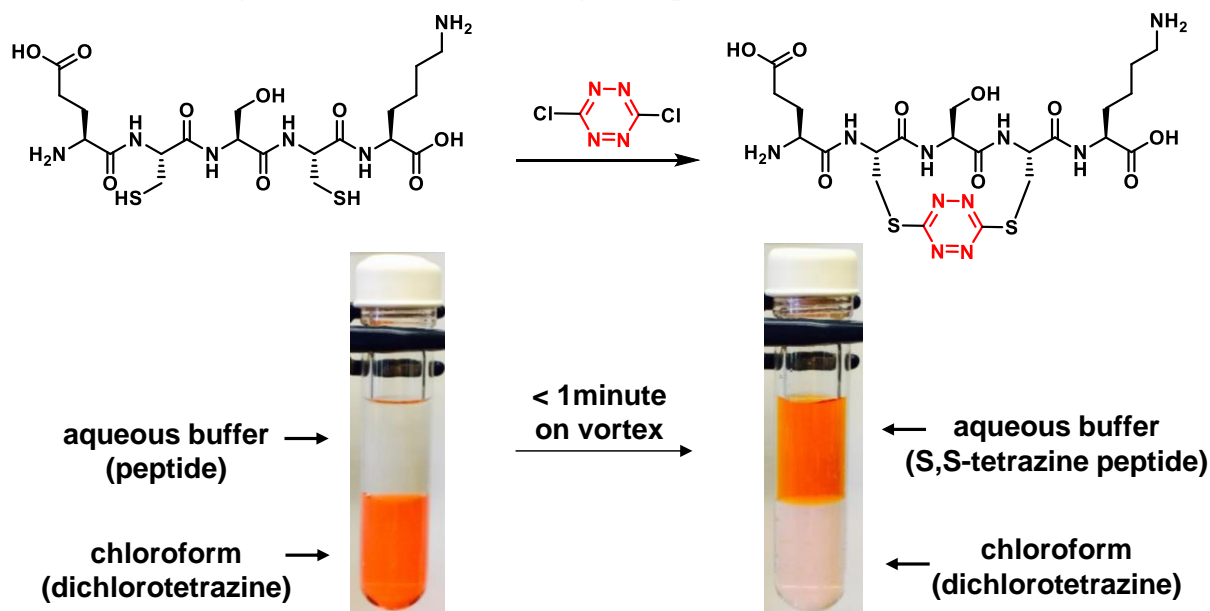

Conditions for the above reaction are different from the general phase-transfer protocol and employ only 1.1 equivalents of dichlorotetrazine to illustrate the colorimetric transfer of tetrazine into the peptide.



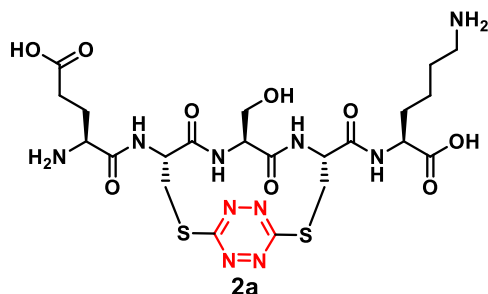

**Peptide 2a.** Peptide **1a** (5.7 mg, 10  $\mu$ mol) was subjected to the general phase-transfer protocol to construct **2a**. The crude reaction mixture was purified by reverse-phase HPLC (gradient 5-15% organic over 5 min) to give (5.1 mg, 78%) of an orange powder after lyophilization. HRMS (ES) Found  $m/z$  647.2028 [(M+H)<sup>+</sup>; calcd for C<sub>22</sub>H<sub>35</sub>N<sub>10</sub>O<sub>9</sub>S<sub>2</sub>: 647.2030]; <sup>1</sup>H NMR (500 MHz, D<sub>2</sub>O)  $\delta$  ppm 1.36 (quin,  $J=7.80$  Hz, 2 H) 1.58 - 1.66 (m, 3 H) 1.68 (q,  $J=7.90$  Hz, 2 H) 1.79 (ddd,  $J=13.90, 8.30, 5.50$  Hz, 1 H) 1.78 (ddd,  $J=13.25, 8.10, 5.30$  Hz, 1 H) 2.07 (q,  $J=7.34$  Hz, 2 H) 2.39 (dd,  $J=7.30, 5.10$  Hz, 1 H) 2.39 (dd,  $J=9.80, 7.40$  Hz, 1 H) 2.93 (t,  $J=7.48$  Hz, 9 H) 3.50 (dd,  $J=15.60, 4.06$  Hz, 3 H) 3.54 (dd,  $J=18.20, 6.20$  Hz, 1 H) 3.57 (dd,  $J=11.30, 7.70$  Hz, 1 H) 4.10 (t,  $J=6.52$  Hz, 1 H) 4.14 (dd,  $J=8.44, 5.24$  Hz, 1 H) 4.20 (dd,  $J=7.10, 6.40$  Hz, 1 H) 4.53 (dd,  $J=15.39, 2.99$  Hz, 1 H) 4.56 (dd,  $J=15.60, 4.92$  Hz, 1 H) 4.80 (t,  $J=3.42$  Hz, 1 H) 4.99 (dd,  $J=4.90, 1.90$  Hz, 1 H); <sup>13</sup>C NMR (126 MHz, Deuterium Oxide)  $\delta$  178.6, 178.1, 171.7, 170.6, 170.4, 169.9, 169.1, 169.1, 61.8, 55.0, 53.9, 52.4, 52.2, 51.5, 39.1, 31.4, 31.1, 30.7, 30.2, 26.7, 26.2, 22.1; IR (KBr, cm<sup>-1</sup>) 3430(br), 3291(br), 3074(br), 2945(br), 1658(s), 1525(m), 1197(s), 1139(m); UV-vis  $\lambda_{\text{Max}}$  278 nm, 419 nm, 507 nm.

# Crude LC Trace for 2a: Gradient 5-60% MeCN, 7 min, 2mL/min

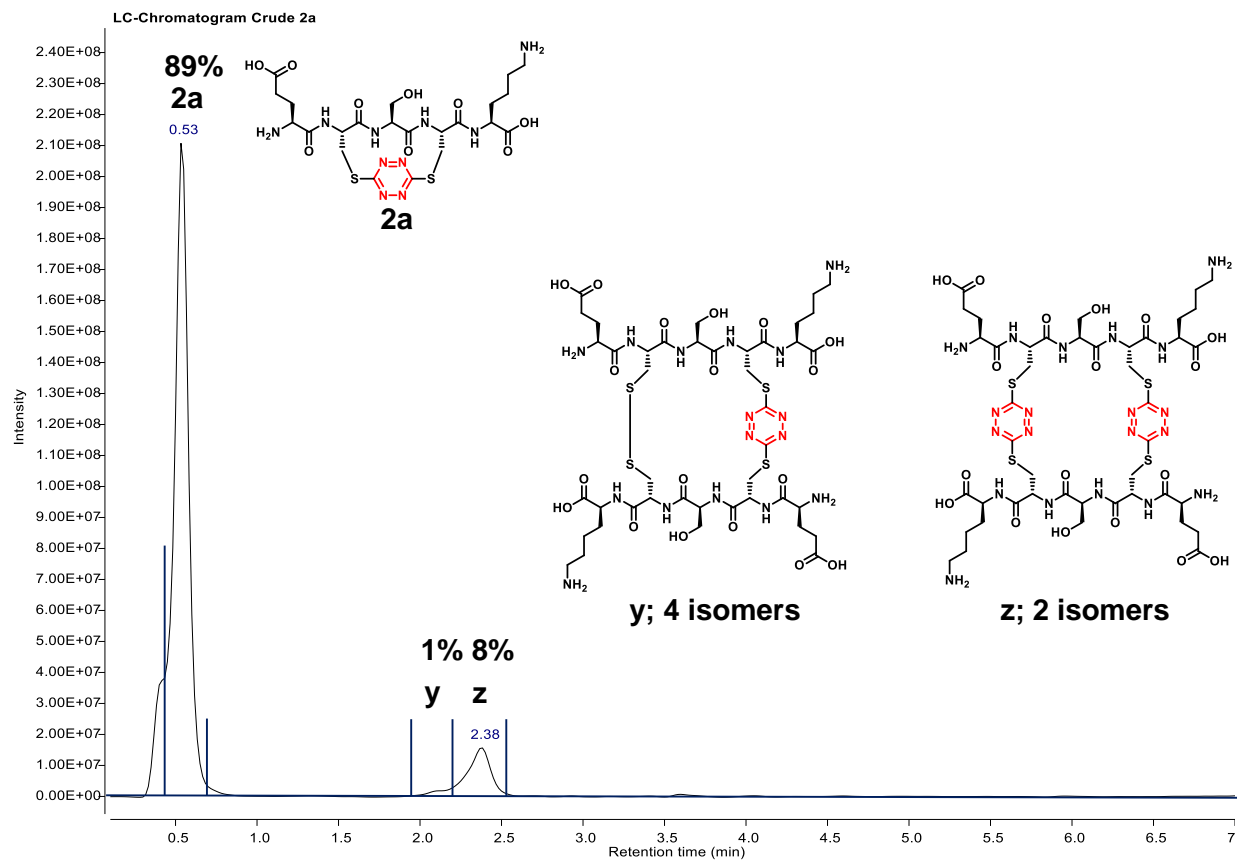

## Purified LC-MS of 2a: Gradient 5-60% MeCN, 7 min, 2mL/min

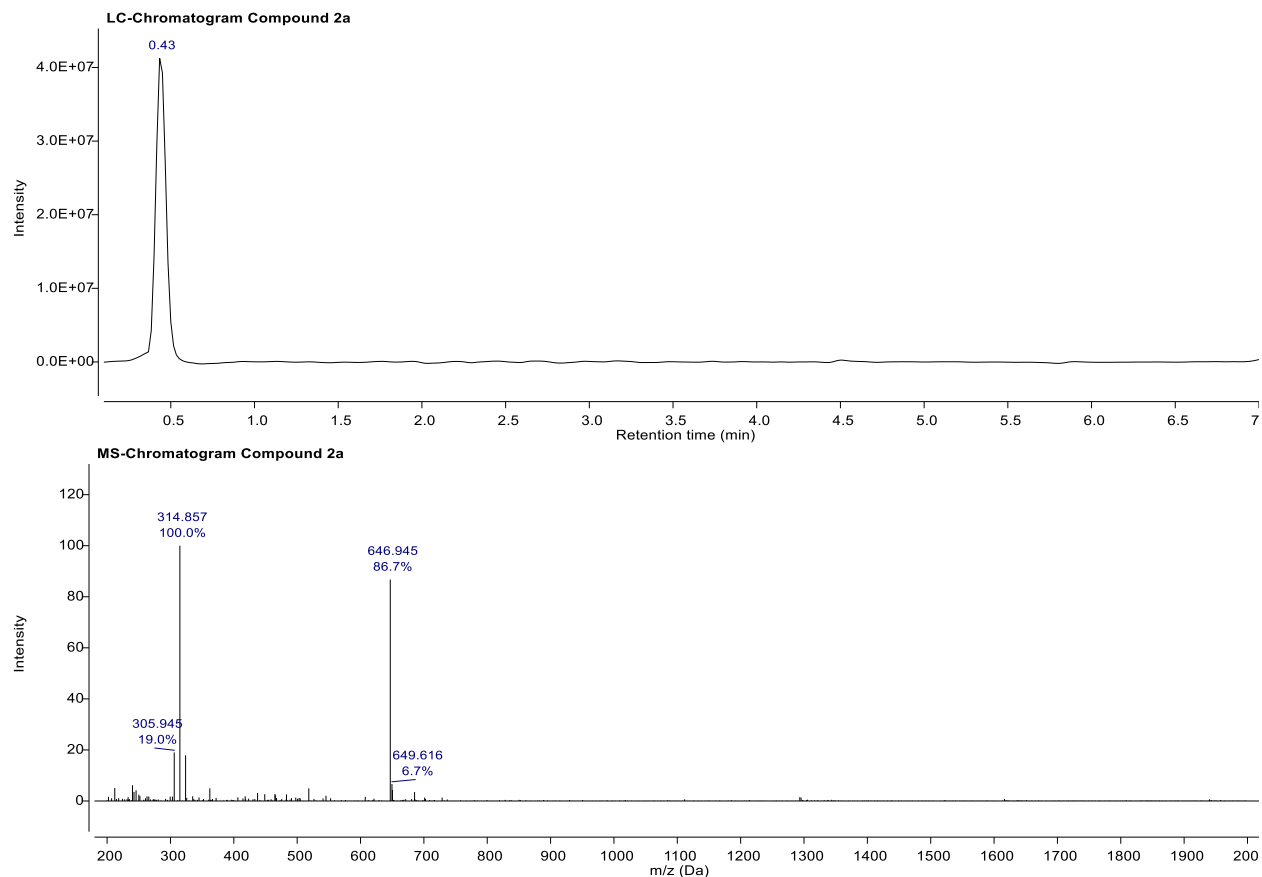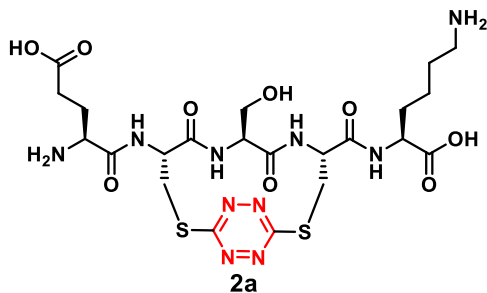

**(Large Scale) Peptide 2a.** Peptide **1a** (570 mg, 1000  $\mu$ mol) was subjected to the general phase-transfer protocol to construct **2a**. The crude reaction mixture was purified by reverse-phase HPLC (gradient 5-15% organic over 5 min) to give (465 mg, 72 %) of an orange powder after lyophilization. Spectral data was identical to compound **2a**.

### UV-Vis Spectrum of Peptide 2a [73 $\mu$ M] in pH 7.8 buffer

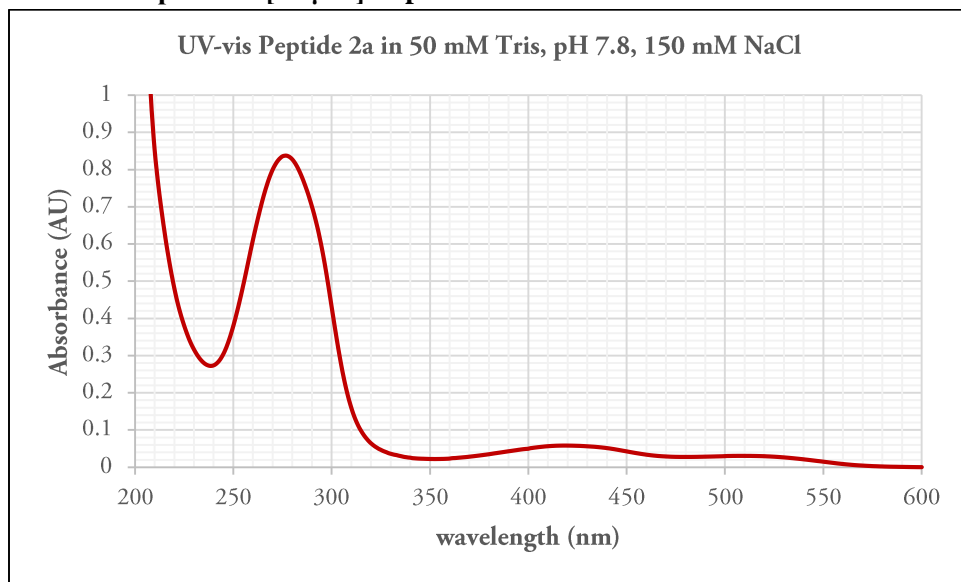

### Zoom Region 300 – 600 nm: UV-Vis Spectrum of Peptide 2a [73 $\mu$ M] in pH 7.8 buffer

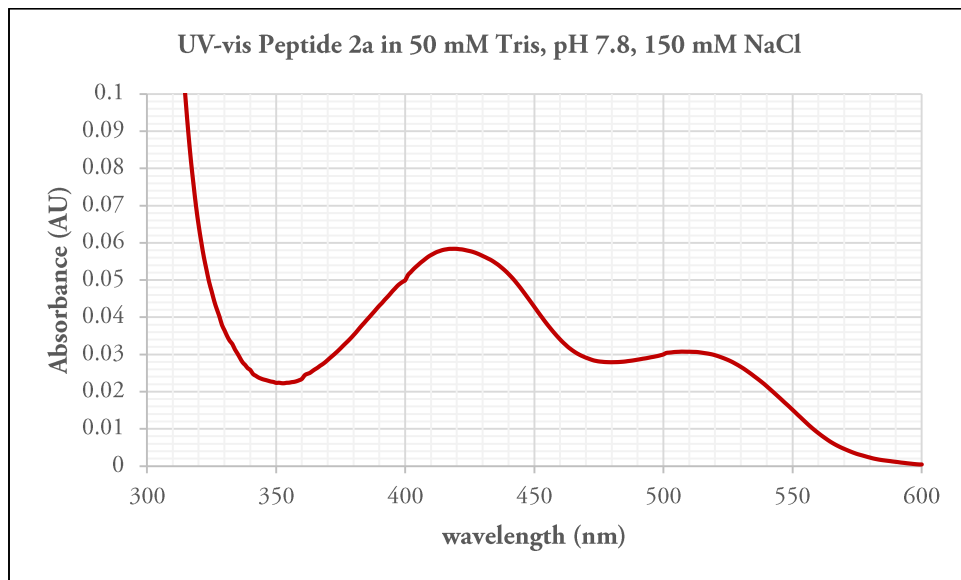

### Calculating the Extinction Coefficient for Peptide 2a at 280, 410 and 532 nm

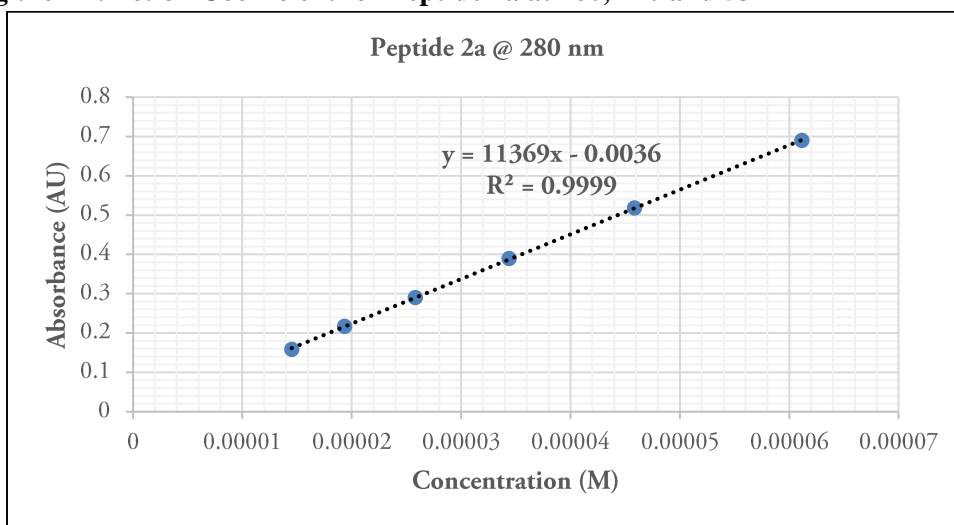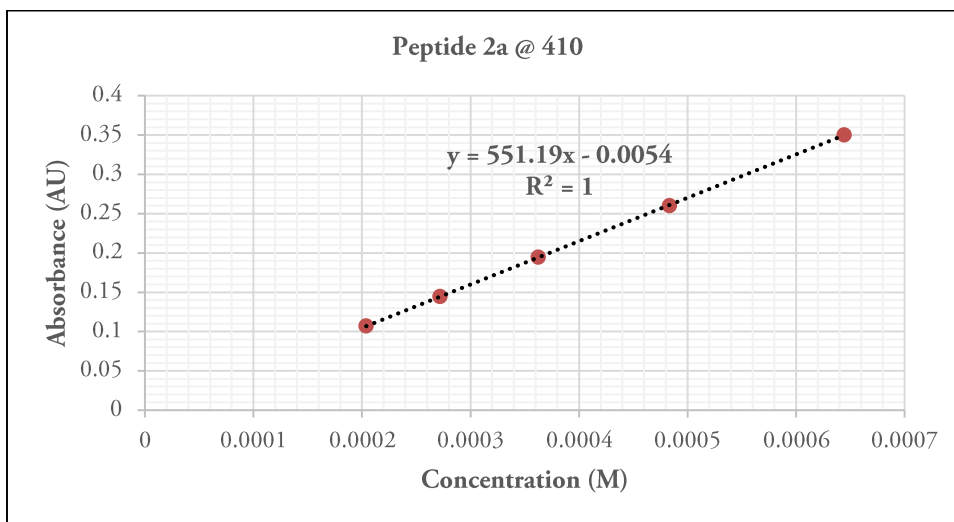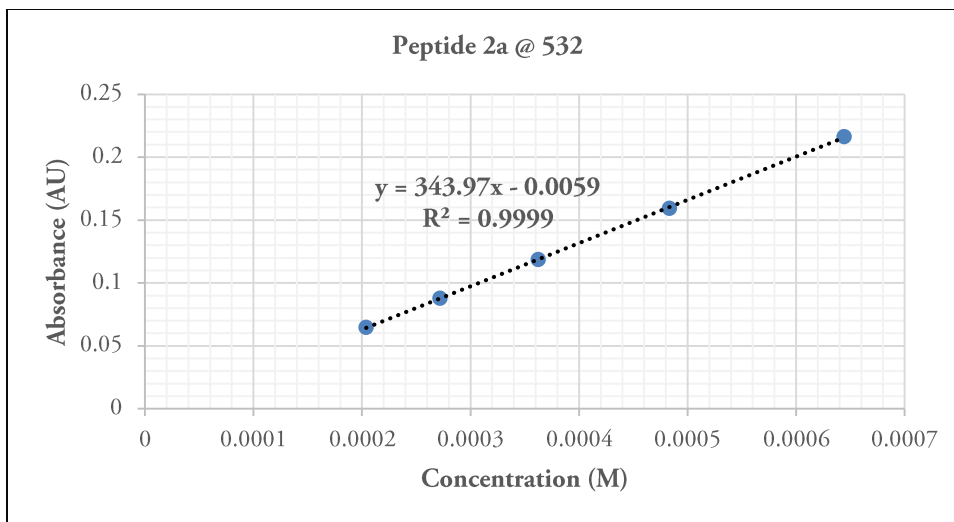

**Table of Stability Data for the S,S-Tetrazine Peptide 2a**

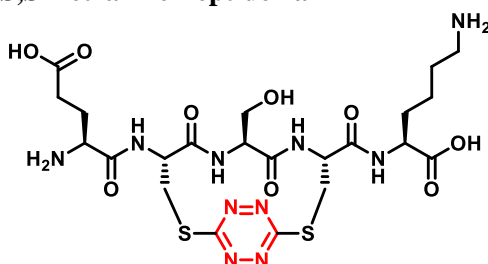

| Buffer                                    | Stability                                                                                           |
|-------------------------------------------|-----------------------------------------------------------------------------------------------------|
| 100 mM phosphate buffer; pH 5             | stable for > 1 week                                                                                 |
| 100 mM phosphate buffer; pH 7             | stable for > 1 week                                                                                 |
| 100 mM phosphate buffer; pH 8             | stable for > 1 week                                                                                 |
| 100 mM phosphate buffer; pH 10            | slowly decomposes half-life $\leq 4$ days                                                           |
| 100 mM acetate buffer, pH 5               | stable for > 1 week                                                                                 |
| 100 mM Tris buffer, pH 7                  | stable for > 1 week                                                                                 |
| 100 mM Tris buffer pH 9                   | slowly decomposes half-life $\geq 1$ week                                                           |
| 100 mM ammonium bicarbonate               | stable for > 1 week                                                                                 |
| citric acid buffer, pH 3                  | stable for > 1 week                                                                                 |
| 6 M Guanidine HCl, pH 7 PBS               | stable for > 1 week                                                                                 |
| 8 M Urea, pH 7 PBS                        | stable for > 1 week                                                                                 |
| Storage Conditions                        | Storage Period                                                                                      |
| ambient temperature                       | stable for months as a lyophilized powder                                                           |
| elevated temperature                      | stable after reflux in water (100°C) for 24 hours                                                   |
| freeze-thaw cycles                        | stable for 5 cycles of freeze-thaw in buffer                                                        |
| light exposure                            | stable for >1 week in buffer under fluorescent lights,<br>stable for months as a lyophilized powder |
| refrigerated temperature                  | stable for > 1 year when stored as a lyophilized powder<br>in a refrigerator at 10°C                |
| Organic solvents/Reagents                 | Stability                                                                                           |
| Methanol                                  | stable for > 1 week                                                                                 |
| dimethyl sulfoxide                        | stable for > 1 week                                                                                 |
| acetonitrile/water (4:1)                  | stable for > 1 week                                                                                 |
| glycerol/water (1:1)                      | stable for > 1 week                                                                                 |
| trifluoroethanol                          | stable for > 1 week                                                                                 |
| trifluoroacetic acid                      | stable for > 2 days                                                                                 |
| dimethyl sulfoxide/trimethylamine (9:1)   | decomposes                                                                                          |
| 1 mM cysteine in 100 mM Tris buffer, pH 7 | turns colorless, mass of <b>2a</b> increases by 2                                                   |
| 1 mM TCEP in 100 mM Tris buffer, pH 7     | turns colorless, mass of <b>2a</b> increases by 2                                                   |

Proposed Mechanism for the reduction of s-tetrazine by TCEP

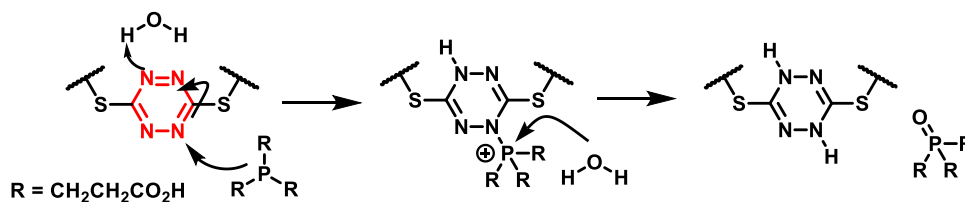

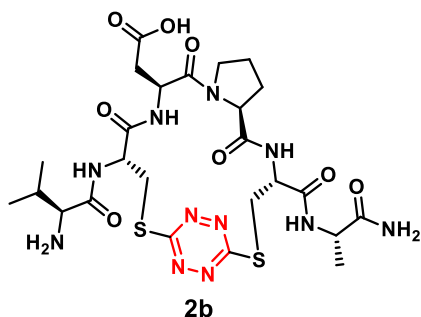

**Peptide 2b.** Peptide **1b** (14.1 mg, 23 $\mu$ mol) was subjected to the general phase-transfer protocol to construct **2b**. The crude reaction mixture was purified by reverse-phase HPLC (gradient 5-30% organic over 10 min) to give (10.5 mg, 67%) of an orange powder after lyophilization.: HRMS (ES) Found  $m/z$  684.2341 [(M+H)<sup>+</sup>; calcd for C<sub>25</sub>H<sub>38</sub>N<sub>11</sub>O<sub>8</sub>S<sub>2</sub>: 684.2346]; <sup>1</sup>H NMR (500MHz, DMSO-d<sub>6</sub>)  $\delta$  = 8.71 (d,  $J$  = 6.8 Hz, 1 H), 8.46 (d,  $J$  = 4.5 Hz, 1 H), 8.00 (d,  $J$  = 7.7 Hz, 1 H), 7.91 (d,  $J$  = 9.6 Hz, 1 H), 7.43 (s, 1 H), 7.15 (br. s., 3 H), 7.04 (s, 1 H), 4.77 (dd,  $J$  = 3.4, 6.8 Hz, 1 H), 4.74 (dd,  $J$  = 2.6, 15.8 Hz, 1 H), 4.69 (dd,  $J$  = 1.9, 9.0 Hz, 1 H), 4.67 (dd,  $J$  = 1.9, 9.6 Hz, 1 H), 4.42 - 4.34 (m, 1 H), 4.20 (quin,  $J$  = 7.2 Hz, 1 H), 4.06 (dd,  $J$  = 11.2, 14.6 Hz, 1 H), 3.77 (dd,  $J$  = 5.9, 7.9 Hz, 1 H), 3.66 (d,  $J$  = 5.1 Hz, 1 H), 3.54 - 3.47 (m, 2 H), 3.44 (dd,  $J$  = 2.6, 15.4 Hz, 1 H), 3.42 (dd,  $J$  = 2.8, 10.0 Hz, 1 H), 2.37 (dd,  $J$  = 2.4, 17.1 Hz, 1 H), 2.19 (dd,  $J$  = 10.5, 17.3 Hz, 1 H), 2.06 (sxt,  $J$  = 6.8 Hz, 1 H), 1.99 - 1.88 (m, 2 H), 1.77 (quind,  $J$  = 6.6, 12.0 Hz, 1 H), 1.71 - 1.62 (m, 1 H), 1.24 (d,  $J$  = 7.1 Hz, 3 H), 0.93 (d,  $J$  = 7.1 Hz, 3 H), 0.91 (d,  $J$  = 6.8 Hz, 3 H); <sup>13</sup>C NMR (126 MHz, DMSO)  $\delta$  173.8, 171.4, 171.1, 171.1, 171.1, 168.7, 168.4, 167.4, 158.3, 59.6, 57.6, 54.3, 51.2, 48.4, 48.1, 46.4, 34.6, 32.0, 31.0, 30.1, 28.6, 25.0, 18.6, 18.5, 17.6; IR (KBr, cm<sup>-1</sup>) 3285(br), 3069(br), 1671(s), 1639(s), 1523(m), 1406(w), 1240(m), 1201(m), 1137(m).

**Gradient 5-60% MeCN, 7 min, 2mL/min**

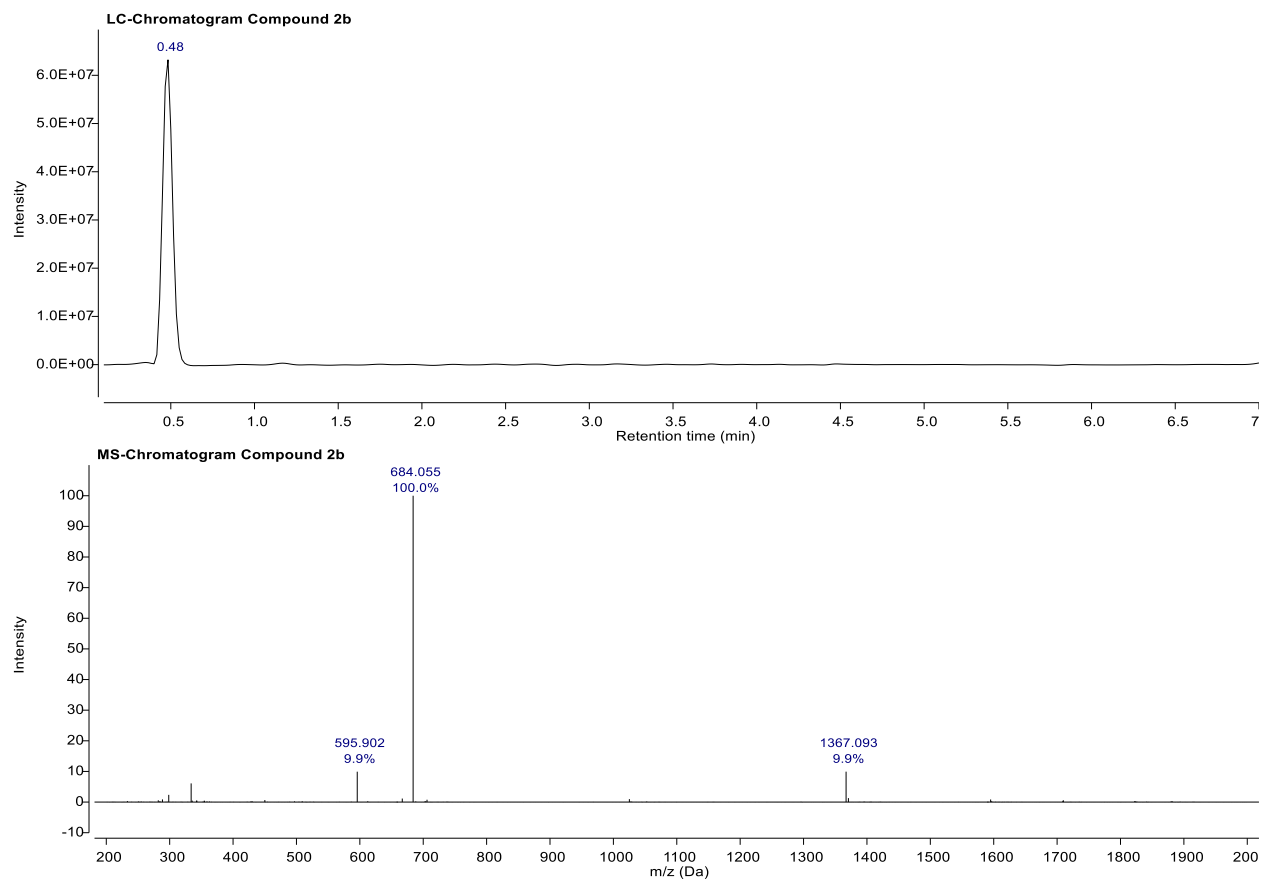



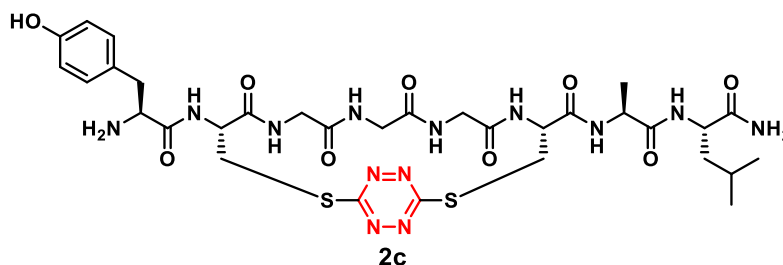

**Peptide 2c.** Peptide **1c** (15.3 mg, 21  $\mu$ mol) was subjected to the general phase-transfer protocol to construct **2c**. The crude reaction mixture was purified by reverse-phase HPLC (gradient 5-40% organic over 15 min) to give (12.9 mg, 76%) of an orange powder after lyophilization: HRMS (ES) Found  $m/z$  820.2981 [(M+H)<sup>+</sup>; calcd for C<sub>32</sub>H<sub>46</sub>N<sub>13</sub>O<sub>9</sub>S<sub>2</sub>: 820.2983]; <sup>1</sup>H NMR (500MHz, DMSO-d<sub>6</sub>)  $\delta$  = 9.36 (s, 1 H), 9.16 (d,  $J$  = 7.3 Hz, 1 H), 8.72 (dd,  $J$  = 4.1, 7.0 Hz, 1 H), 8.22 (d,  $J$  = 7.3 Hz, 1 H), 8.19 - 8.15 (m, 3 H), 7.88 (d,  $J$  = 8.1 Hz, 1 H), 7.84 (d,  $J$  = 8.3 Hz, 1 H), 7.73 (t,  $J$  = 5.7 Hz, 1 H), 7.24 (s, 1 H), 7.05 (br. s., 1 H), 7.03 (d,  $J$  = 8.5 Hz, 2 H), 6.96 (br. s., 1 H), 6.69 (d,  $J$  = 8.3 Hz, 2 H), 6.51 (s, 1 H), 4.81 - 4.72 (m, 2 H), 4.28 (quin,  $J$  = 7.2 Hz, 1 H), 4.21 (dt,  $J$  = 6.0, 8.5 Hz, 1 H), 4.03 (t,  $J$  = 6.0 Hz, 1 H), 4.00 (dd,  $J$  = 7.5, 16.2 Hz, 1 H), 3.80 (dd,  $J$  = 4.1, 10.3 Hz, 1 H), 3.77 (dd,  $J$  = 6.0, 16.5 Hz, 1 H), 3.71 - 3.55 (m, 4 H), 3.49 (dd,  $J$  = 3.8, 16.0 Hz, 1 H), 3.02 (dd,  $J$  = 5.6, 14.3 Hz, 1 H), 2.85 (dd,  $J$  = 7.5, 13.9 Hz, 1 H), 1.65 - 1.55 (m, 1 H), 1.51 - 1.42 (m, 2 H), 1.25 (d,  $J$  = 7.1 Hz, 3 H), 0.88 (d,  $J$  = 6.6 Hz, 3 H), 0.84 (d,  $J$  = 6.4 Hz, 3 H); <sup>13</sup>C NMR (126MHz, DMSO-d<sub>6</sub>)  $\delta$  = 174.0, 172.2, 171.6, 171.0, 169.2, 169.1, 169.0, 169.0, 168.8, 168.2, 158.1, 156.5, 130.5, 124.6, 115.3, 53.6, 52.6, 52.1, 50.9, 48.6, 42.5, 42.2, 42.1, 40.9, 36.0, 32.0, 31.3, 24.2, 23.0, 21.6, 17.8; IR (KBr, cm<sup>-1</sup>) 3293(br), 2928(w), 1670(s), 1517(m), 1238(m).

**Gradient 5-60% MeCN, 7 min, 2mL/min**

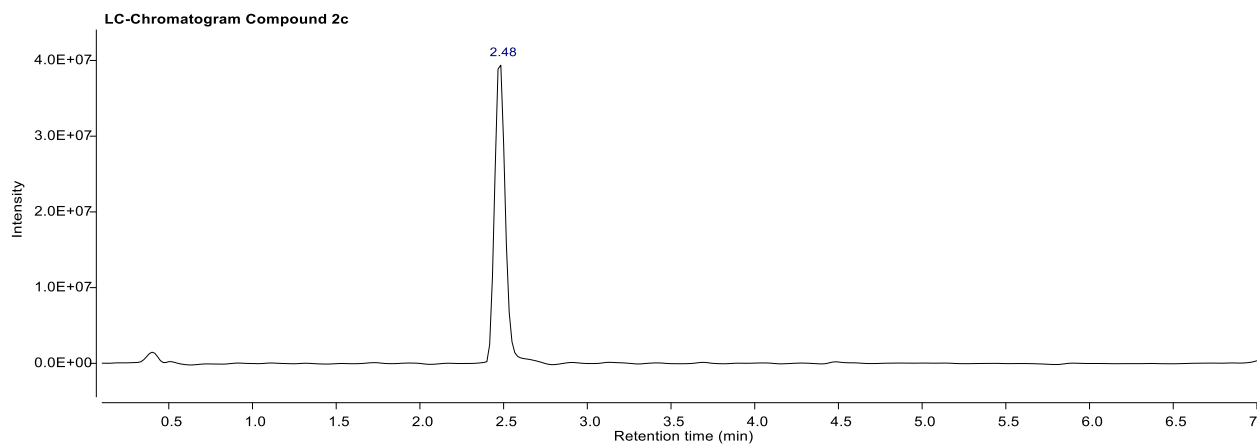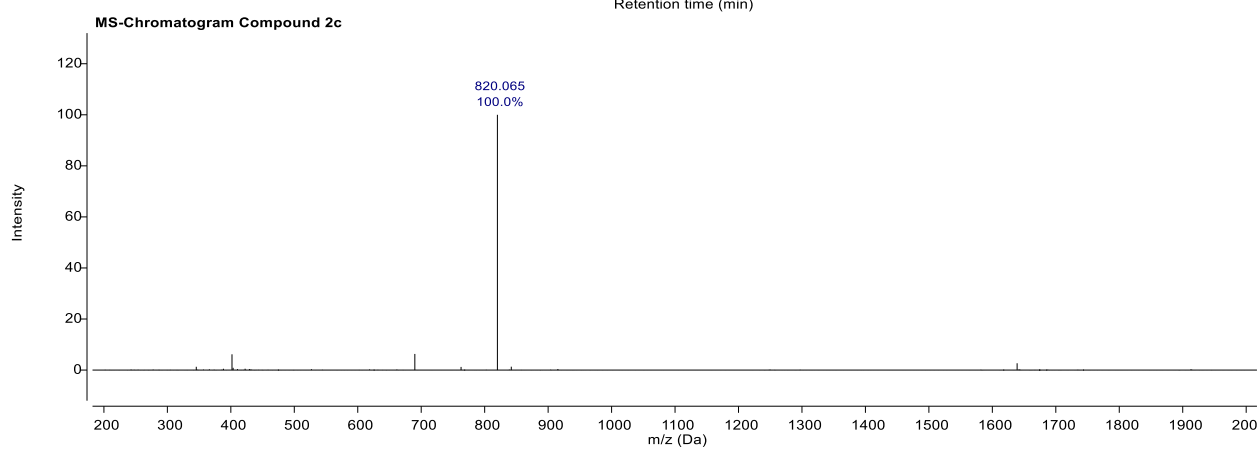

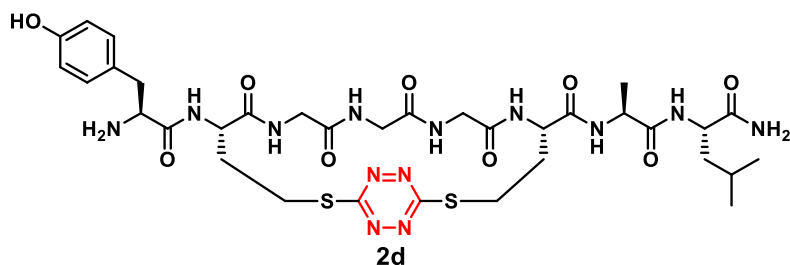

**Peptide 2d.** Peptide **1d** (16.0 mg, 21  $\mu$ mol) was subjected to the general phase-transfer protocol to construct **2d**. The crude reaction mixture was purified by reverse-phase HPLC (gradient 5-40% organic over 15 min) to give (11.2 mg, 64%) of an orange powder after lyophilization: HRMS (ES) Found  $m/z$  848.3286 [(M+H)<sup>+</sup>; calcd for C<sub>34</sub>H<sub>50</sub>N<sub>13</sub>O<sub>9</sub>S<sub>2</sub>: 848.3296]; <sup>1</sup>H NMR (500MHz, DMSO-d<sub>6</sub>)  $\delta$  = 9.36 (br. s., 1 H), 8.76 (d,  $J$  = 7.5 Hz, 1 H), 8.31 (t,  $J$  = 5.4 Hz, 1 H), 8.21 (d,  $J$  = 6.3 Hz, 1 H), 8.16 - 8.06 (m, 3 H), 8.02 (t,  $J$  = 5.9 Hz, 1 H), 7.96 (d,  $J$  = 8.1 Hz, 1 H), 7.77 (d,  $J$  = 7.7 Hz, 1 H), 7.23 (br. s., 1 H), 7.04 (d,  $J$  = 7.1 Hz, 2 H), 6.96 (br. s., 1 H), 6.70 (d,  $J$  = 7.1 Hz, 2 H), 4.59 (t,  $J$  = 9.0 Hz, 1 H), 4.45 (dd,  $J$  = 6.9, 15.0 Hz, 1 H), 4.26 (ddd,  $J$  = 6.5, 7.3, 14.9 Hz, 1 H), 4.20 (dd,  $J$  = 7.5, 15.9 Hz, 1 H), 4.02 (br. s., 1 H), 3.90 (dd,  $J$  = 5.9, 16.1 Hz, 1 H), 3.77 (dd,  $J$  = 5.2, 16.4 Hz, 1 H), 3.74 (dd,  $J$  = 4.8, 14.9 Hz, 1 H), 3.69 - 3.53 (m, 4 H), 3.41 - 3.33 (m, 2 H), 3.24 (quin,  $J$  = 7.4 Hz, 2 H), 2.99 (dd,  $J$  = 5.0, 13.7 Hz, 1 H), 2.83 (dd,  $J$  = 7.5, 14.1 Hz, 1 H), 2.30 (d,  $J$  = 7.7 Hz, 1 H), 2.08 (ddd,  $J$  = 5.4, 8.7, 14.3 Hz, 1 H), 2.04 - 1.91 (m, 2 H), 1.59 (dt,  $J$  = 6.4, 13.0 Hz, 1 H), 1.51 - 1.38 (m, 1 H), 1.23 (d,  $J$  = 7.1 Hz, 3 H), 0.87 (d,  $J$  = 5.4 Hz, 3 H), 0.83 (d,  $J$  = 5.7 Hz, 3 H); <sup>13</sup>C NMR (126MHz, DMSO-d<sub>6</sub>)  $\delta$  = 174.1, 171.8, 171.7, 171.7, 170.8, 170.5, 169.2, 169.1, 168.8, 168.3, 156.6, 130.5, 124.8, 115.4, 53.7, 51.4, 51.2, 50.8, 48.5, 42.6, 42.3, 42.1, 41.0, 36.1, 31.5, 31.2, 26.4, 26.2, 24.2, 23.1, 21.6, 17.7; IR (KBr, cm<sup>-1</sup>) 3290(br), 2927(w), 1672(s), 1516(m), 1240(m).

**Gradient 5-60% MeCN, 7 min, 2mL/min**

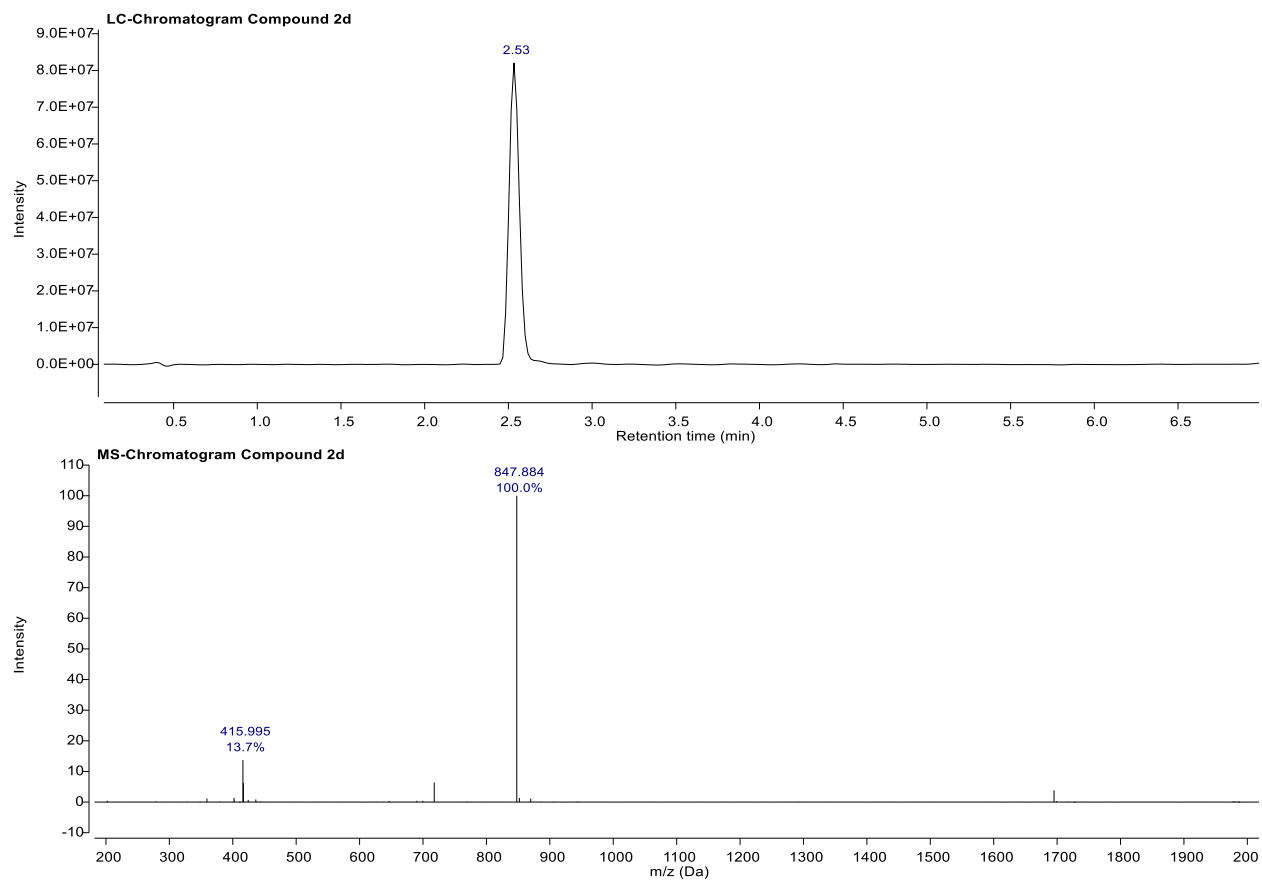

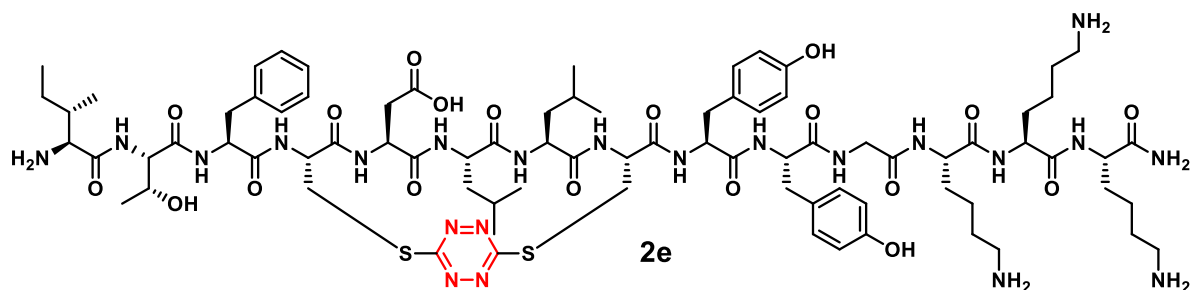

**Peptide 2e.** Peptide **1e** (17.0 mg, 10  $\mu$ mol) was subjected to the general phase-transfer protocol to construct **2e**. The crude reaction mixture was purified by reverse-phase HPLC [eluent water/MeCN/AcOH (85:10:5) and MeCN (organic) buffered with 0.1% TFA] (gradient 0-60% organic over 20 min) to give (11.8 mg, 67%) of an orange powder after lyophilization: MALDI-TOF Found  $m/z$  1793.153 [(M+Na)<sup>+</sup>; calcd for C<sub>81</sub>H<sub>122</sub>N<sub>22</sub>NaO<sub>19</sub>S<sub>2</sub>: 1793.860]; <sup>1</sup>H NMR (500 MHz, DMSO-*d*<sub>6</sub>)  $\delta$  8.93 (s, 1H), 8.63 (d,  $J$  = 7.2 Hz, 1H), 8.41 (d,  $J$  = 8.3 Hz, 1H), 8.27 (d,  $J$  = 7.6 Hz, 1H), 8.23 – 8.12 (m, 6H), 8.12 – 8.05 (m, 1H), 8.01 (s, 7H), 7.95 (s, 3H), 7.89 (d,  $J$  = 8.0 Hz, 2H), 7.43 (s, 1H), 7.29 – 7.23 (m, 1H), 7.22 (s, 1H), 7.21 (s, 2H), 7.18 – 7.12 (m, 1H), 7.10 (s, 1H), 7.04 (d,  $J$  = 8.3 Hz, 2H), 6.97 (d,  $J$  = 8.3 Hz, 2H), 6.65 (d,  $J$  = 8.0 Hz, 2H), 6.62 (d,  $J$  = 8.2 Hz, 2H), 4.84 (q,  $J$  = 6.5 Hz, 1H), 4.73 – 4.63 (m, 2H), 4.59 (dd,  $J$  = 13.9, 5.9 Hz, 1H), 4.42 (dq,  $J$  = 15.0, 7.6 Hz, 2H), 4.34 – 4.22 (m, 3H), 4.22 – 4.09 (m, 3H), 3.92 (dd,  $J$  = 12.5, 6.8 Hz, 3H), 3.81 – 3.68 (m, 3H), 3.02 (dd,  $J$  = 14.2, 4.3 Hz, 1H), 2.89 (dd,  $J$  = 34.1, 11.3 Hz, 3H), 2.85 – 2.79 (m, 1H), 2.74 (h,  $J$  = 6.1 Hz, 8H), 2.66 (dd,  $J$  = 16.2, 4.8 Hz, 2H), 1.73 – 1.61 (m, 2H), 1.59 – 1.51 (m, 10H), 1.50 – 1.42 (m, 3H), 1.32 (dt,  $J$  = 15.7, 7.9 Hz, 9H), 1.22 (d,  $J$  = 6.9 Hz, 1H), 1.05 (d,  $J$  = 6.1 Hz, 4H), 0.88 (d,  $J$  = 6.5 Hz, 3H), 0.85 (d,  $J$  = 6.3 Hz, 3H), 0.83 (d,  $J$  = 6.5 Hz, 3H), 0.81 (d,  $J$  = 4.0 Hz, 3H), 0.80 (d,  $J$  = 3.7 Hz, 4H), 0.78 (d, 3H), 0.75 (d,  $J$  = 6.4 Hz, 3H); <sup>13</sup>C NMR (126 MHz, DMSO-*d*<sub>6</sub>)  $\delta$  173.5, 172.1, 171.7, 171.6, 171.4, 171.4, 171.1, 170.9, 170.8, 170.7, 169.2, 169.2, 169.0, 168.7, 167.8, 155.9, 155.8, 137.4, 130.2, 129.2, 128.0, 127.7, 127.5, 126.3, 66.9, 65.8, 58.3, 56.3, 54.5, 54.4, 53.5, 52.8, 52.4, 52.2, 51.1, 50.8, 49.6, 42.0, 38.5, 37.4, 36.7, 36.3, 36.2, 31.4, 30.8, 26.5, 26.5, 26.5, 24.0, 23.9, 23.5, 23.1, 22.3, 22.2, 21.8, 21.5, 21.2, 19.4, 14.5, 11.2; IR (KBr, cm<sup>-1</sup>) 3412(br), 2963(w), 1668(s), 1517(m), 1238(w), 1203(m), 1134(m), 1033(w), 1009(w).

# Gradient 5-60% MeCN, 15 min, 2mL/min

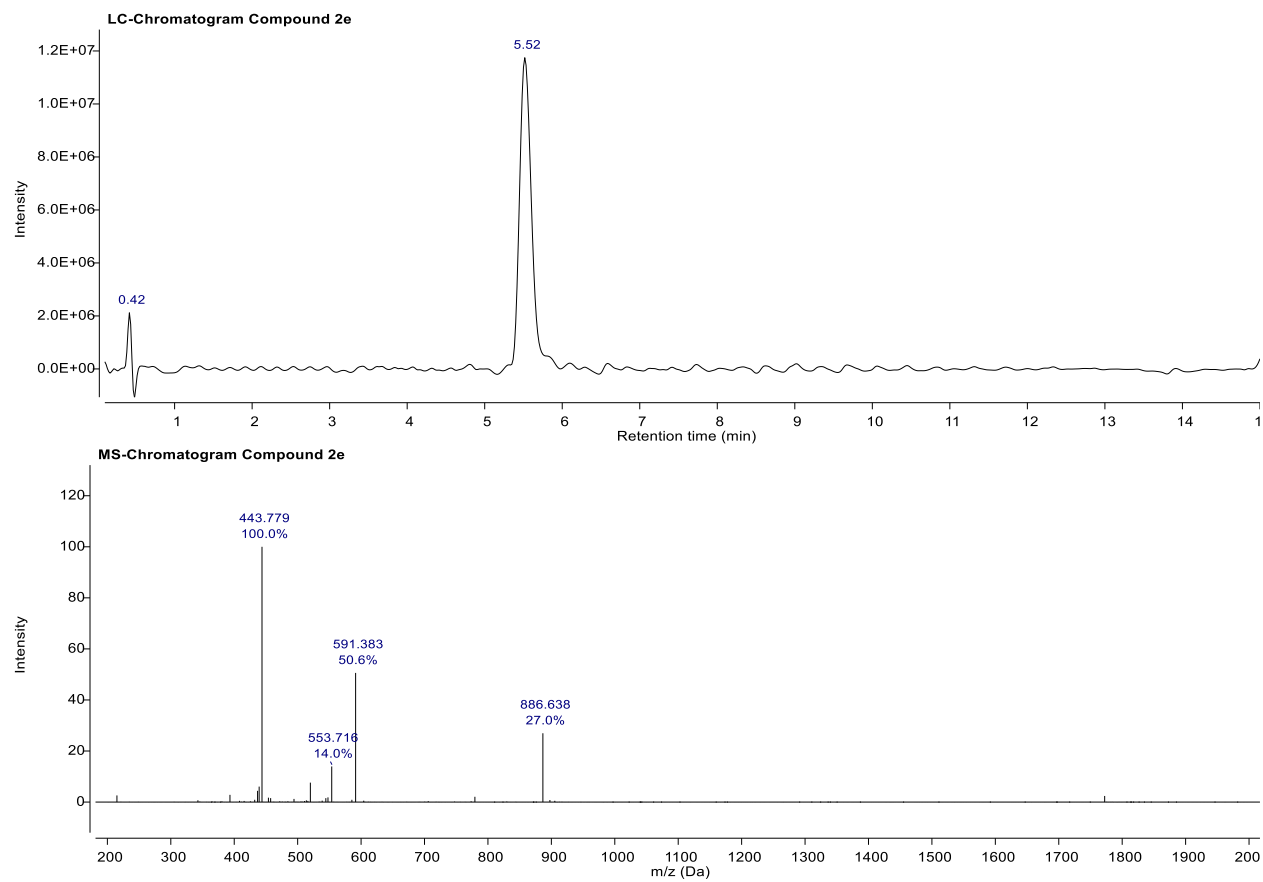

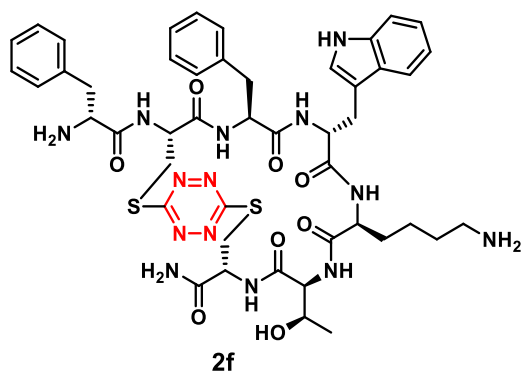

**Peptide 2f.** Peptide **1f** (11.0 mg, 11.8  $\mu\text{mol}$ ) was subjected to the general phase-transfer protocol to construct **2f**. The crude reaction mixture was purified by reverse-phase HPLC (gradient 10-60% organic over 15 min) to give 6.2 mg (52%) of an orange powder after lyophilization: HRMS (ES) Found  $m/z$  1011.4095 [(M+H)<sup>+</sup>; calcd for C<sub>47</sub>H<sub>59</sub>N<sub>14</sub>O<sub>8</sub>S<sub>2</sub>: 1011.4082]; <sup>1</sup>H NMR (500 MHz, DMSO-*d*<sub>6</sub>)  $\delta$  10.87 (s, 1H), 9.07 (d,  $J$  = 8.3 Hz, 1H), 8.57 (d,  $J$  = 8.2 Hz, 1H), 8.36 (d,  $J$  = 8.6 Hz, 1H), 8.30 (d,  $J$  = 8.6 Hz, 1H), 8.23 (d,  $J$  = 8.4 Hz, 1H), 8.14 (s, 3H), 7.73 (s, 3H), 7.66 (d,  $J$  = 7.9 Hz, 1H), 7.50 (d,  $J$  = 8.1 Hz, 1H), 7.38 (d,  $J$  = 30.6 Hz, 2H), 7.31 (d,  $J$  = 8.0 Hz, 1H), 7.30 – 7.28 (m, 4H), 7.28 – 7.21 (m, 2H), 7.17 (d,  $J$  = 2.4 Hz, 1H), 7.12 – 6.97 (m, 5H), 6.88 (d,  $J$  = 6.8 Hz, 2H), 6.59 (s, 1H), 4.97 (d,  $J$  = 4.8 Hz, 1H), 4.84 (td,  $J$  = 8.8, 4.5 Hz, 1H), 4.70 (dd,  $J$  = 8.3, 3.4 Hz, 1H), 4.68 – 4.64 (m, 1H), 4.57 (ddd,  $J$  = 14.2, 8.6, 5.8 Hz, 1H), 4.28 (dt,  $J$  = 14.3, 8.6, 6.1 Hz, 2H), 4.20 (dd,  $J$  = 8.2, 4.5 Hz, 1H), 4.15 – 4.07 (m, 1H), 3.86 (q,  $J$  = 5.3 Hz, 1H), 3.67 – 3.53 (m, 2H), 3.45 (dd,  $J$  = 14.0, 8.2 Hz, 1H), 3.09 (dt,  $J$  = 13.9, 5.3 Hz, 3H), 2.88 (ddd,  $J$  = 19.7, 14.2, 9.2 Hz, 2H), 2.75 – 2.66 (m, 5H), 2.63 (dd,  $J$  = 13.4, 4.8 Hz, 1H), 1.61 (dq,  $J$  = 17.3, 5.4 Hz, 1H), 1.54 – 1.38 (m, 3H), 1.27 – 1.07 (m, 3H), 0.96 (d,  $J$  = 6.3 Hz, 3H); <sup>13</sup>C NMR (126 MHz, DMSO-*d*<sub>6</sub>)  $\delta$  171.6, 171.4, 171.3, 171.0, 170.0, 169.0, 168.5, 168.4, 157.8, 137.2, 136.2, 134.8, 129.6, 129.3, 128.6, 127.9, 127.2, 127.1, 126.2, 124.1, 121.0, 118.6, 118.3, 111.4, 109.8, 66.9, 57.4, 53.6, 53.5, 53.4, 52.9, 51.4, 50.4, 38.7, 37.9, 37.3, 33.8, 32.0, 30.7, 28.7, 26.6, 22.1, 19.5.

# Gradient 5-60% MeCN, 10 min, 2mL/min

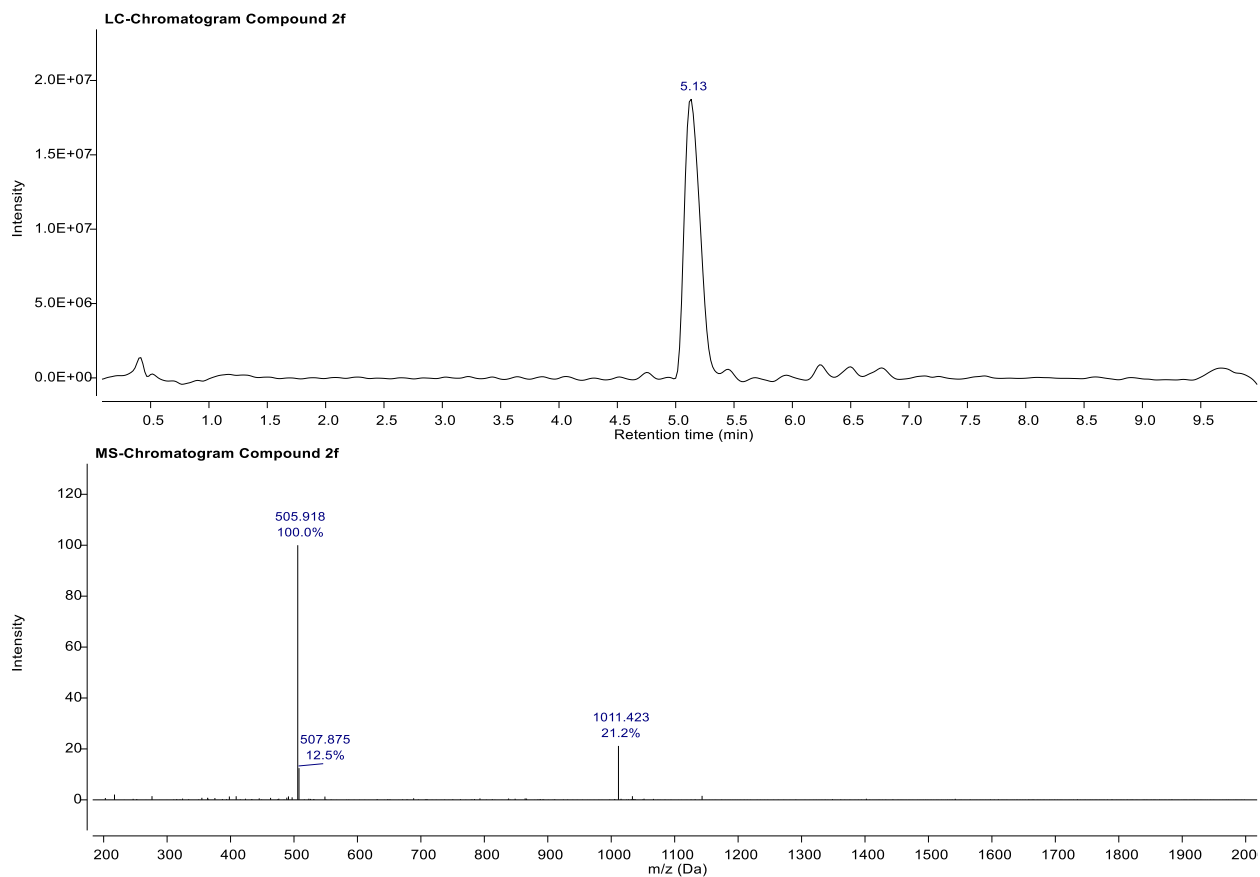



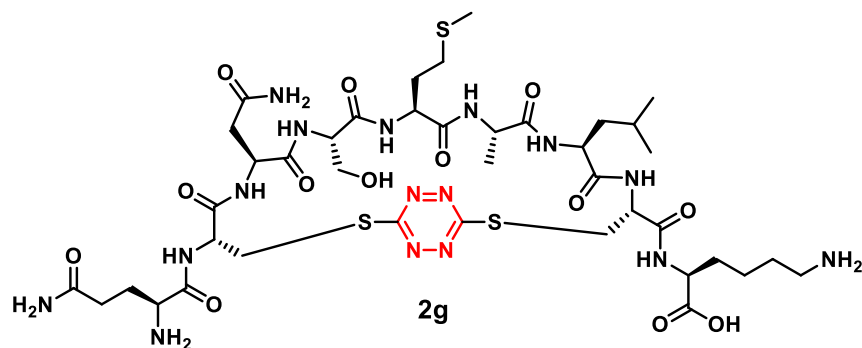

**Peptide 2g.** Peptide **1g** (10.0 mg, 10  $\mu$ mol) was subjected to the general phase-transfer protocol to construct **2e**. The crude reaction mixture was purified by reverse-phase HPLC [elutant water/MeCN/AcOH (85:10:5) and MeCN (organic) buffered with 0.1%TFA] (gradient 0-60% organic over 15 min) to give (4.7 mg, 44 %) of an orange powder after lyophilization: HRMS (ES) Found  $m/z$  1075.4239 [(M+H)<sup>+</sup>]; calcd for C<sub>34</sub>H<sub>50</sub>N<sub>13</sub>O<sub>9</sub>S<sub>2</sub>: 1075.4236] <sup>1</sup>H NMR (500 MHz, DMSO-*d*<sub>6</sub>)  $\delta$  9.19 (d,  $J$  = 8.1 Hz, 1H), 8.47 (d,  $J$  = 7.3 Hz, 1H), 8.41 – 8.28 (m, 5H), 8.22 (d,  $J$  = 8.1 Hz, 1H), 8.07 (d,  $J$  = 7.8 Hz, 1H), 8.01 (d,  $J$  = 5.2 Hz, 1H), 7.99 – 7.89 (m, 3H), 7.66 (s, 2H), 7.59 – 7.48 (m, 2H), 7.08 (s, 1H), 6.98 (s, 1H), 4.82 (ddd,  $J$  = 13.6, 8.2, 5.0 Hz, 1H), 4.65 (dd,  $J$  = 14.7, 6.9 Hz, 1H), 4.53 (dd,  $J$  = 13.7, 6.2 Hz, 1H), 4.28 – 4.05 (m, 6H), 3.86 (dd,  $J$  = 11.3, 5.8 Hz, 1H), 3.79 – 3.69 (m, 3H), 3.64 (dd,  $J$  = 14.0, 6.9 Hz, 1H), 2.73 (q,  $J$  = 6.8 Hz, 2H), 2.67 (dd,  $J$  = 15.6, 6.5 Hz, 1H), 2.58 (dd,  $J$  = 15.3, 6.1 Hz, 1H), 2.42 – 2.34 (m, 1H), 2.23 (dd,  $J$  = 9.2, 6.7 Hz, 2H), 2.01 (s, 4H), 1.94 (q,  $J$  = 7.4 Hz, 2H), 1.86 – 1.77 (m, 1H), 1.77 – 1.68 (m, 1H), 1.65 – 1.46 (m, 5H), 1.44 – 1.30 (m, 5H), 1.16 (d,  $J$  = 7.1 Hz, 3H), 0.88 (d,  $J$  = 6.5 Hz, 3H), 0.83 (d,  $J$  = 6.5 Hz, 4H); <sup>13</sup>C NMR (126 MHz, DMSO-*d*<sub>6</sub>)  $\delta$  173.5, 173.1, 172.2, 172.1, 172.0, 171.7, 171.3, 170.9, 170.2, 169.4, 168.8, 168.7, 61.1, 56.0, 52.1, 51.8, 51.8, 51.6, 51.2, 50.2, 48.6, 38.5, 36.8, 32.3, 30.9, 30.4, 30.4, 30.2, 29.9, 27.0, 26.5, 24.2, 23.2, 22.2, 21.5, 17.8, 14.6; IR (KBr, cm<sup>-1</sup>) 3413(br), 2923(m), 1655(s), 1541(m), 1236(m).

# Gradient 5-60% MeCN, 10 min, 2mL/min

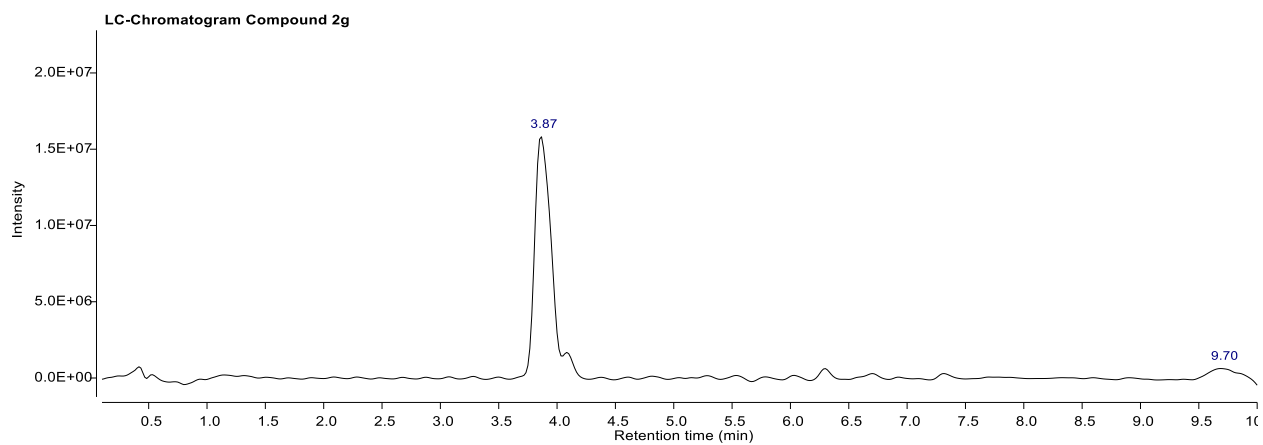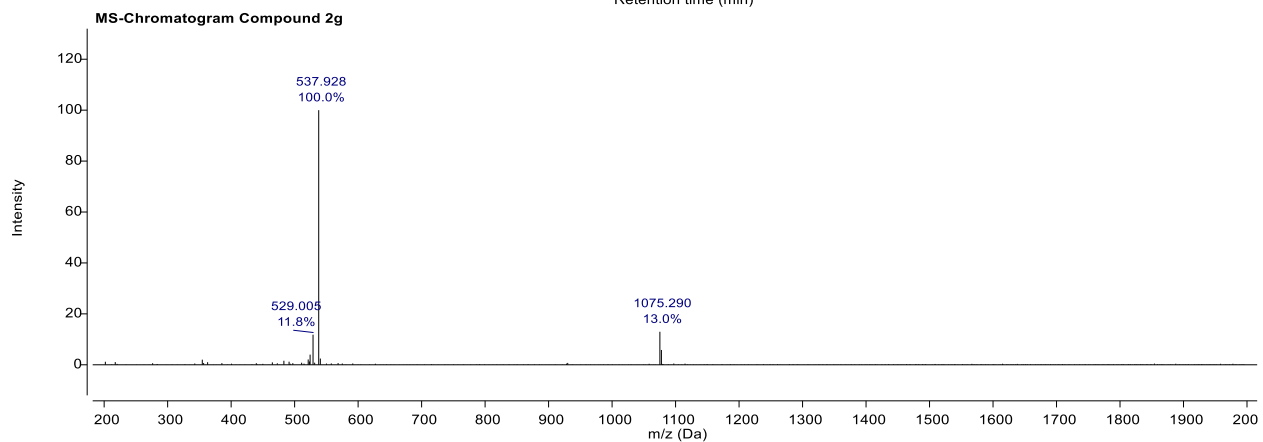

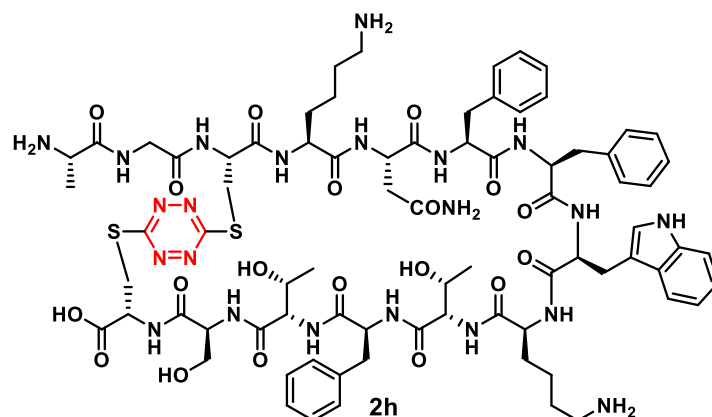

**Peptide 2h.** Peptide **1h** (8.3 mg, 5.1  $\mu\text{mol}$ ) was subjected to the general phase-transfer protocol to construct **2h**. The crude reaction mixture was purified by reverse-phase HPLC (gradient 10-60% organic over 15 min) to give (5.5 mg, 63%) of an orange powder after lyophilization: MALDI-TOF Found  $m/z$  1717.968  $[(M+H)^+]$ ; calcd for  $C_{78}H_{105}N_{22}O_{19}S_2$ : 1717.736].  $^1\text{H}$  NMR (500 MHz,  $\text{DMSO-}d_6$ )  $\delta$  10.79 (s, 1H), 8.66 (t,  $J = 4.9$  Hz, 2H), 8.50 (d,  $J = 6.4$  Hz, 2H), 8.43 – 8.37 (m, 1H), 8.33 – 8.26 (m, 1H), 8.20 – 8.16 (m, 5H), 8.12 – 8.06 (m, 1H), 8.05 – 8.01 (m, 5H), 7.93 (d,  $J = 5.2$  Hz, 1H), 7.88 – 7.83 (m, 13H), 7.79 – 7.72 (m, 2H), 7.70 – 7.65 (m, 3H), 7.58 (d,  $J = 7.5$  Hz, 2H), 7.37 – 7.27 (m, 1H), 7.25 – 7.04 (m, 22H), 7.04 – 6.93 (m, 2H), 5.44 – 5.40 (m, 1H), 5.26 – 5.19 (m, 1H), 5.16 – 5.10 (m, 1H), 4.96 – 4.92 (m, 1H), 4.86 – 4.79 (m, 1H), 4.79 – 4.71 (m, 1H), 4.62 – 4.52 (m, 2H), 4.47 – 4.41 (m, 1H), 4.34 – 4.29 (m, 6H), 4.26 – 4.22 (m, 2H), 4.15 – 4.08 (m, 1H), 3.99 – 3.95 (m, 1H), 3.92 – 3.86 (m, 2H), 3.84 (d,  $J = 5.8$  Hz, 1H), 3.81 – 3.73 (m, 1H), 3.62 – 3.58 (m, 3H), 1.69 – 1.65 (m, 3H), 1.57 – 1.39 (m, 3H), 1.36 (t,  $J = 7.2$  Hz, 3H), 1.23 (d,  $J = 7.0$  Hz, 2H), 1.05 – 0.99 (m, 5H), 0.96 (t,  $J = 6.2$  Hz, 3H);  $^{13}\text{C}$  NMR (126 MHz,  $\text{DMSO}$ )  $\delta$  176.4, 171.9, 171.7, 171.6, 171.4, 171.2, 171.0, 171.0, 170.9, 170.9, 170.8, 170.1, 169.9, 169.7, 169.4, 168.6, 168.5, 137.8, 137.7, 137.6, 137.5, 136.2, 136.1, 129.2, 129.2, 129.1, 128.9, 128.9, 128.1, 128.1, 127.3, 127.1, 126.3, 123.7, 72.5, 69.8, 67.0, 66.9, 66.5, 65.8, 63.1, 61.8, 61.5, 57.8, 55.2, 55.1, 54.8, 54.0, 53.7, 53.5, 52.7, 52.4, 51.1, 49.6, 48.2, 43.2, 41.8, 38.7, 37.5, 37.2, 37.0, 36.6, 26.7, 26.6, 26.5, 26.5, 22.5, 22.2, 20.5, 19.4, 19.0, 17.3; IR (KBr,  $\text{cm}^{-1}$ ) 3421(br), 2925(m), 1654(s), 1508(m), 1117(m), 1032(s), 1008(s).

# Gradient 5-60% MeCN, 15 min, 2mL/min

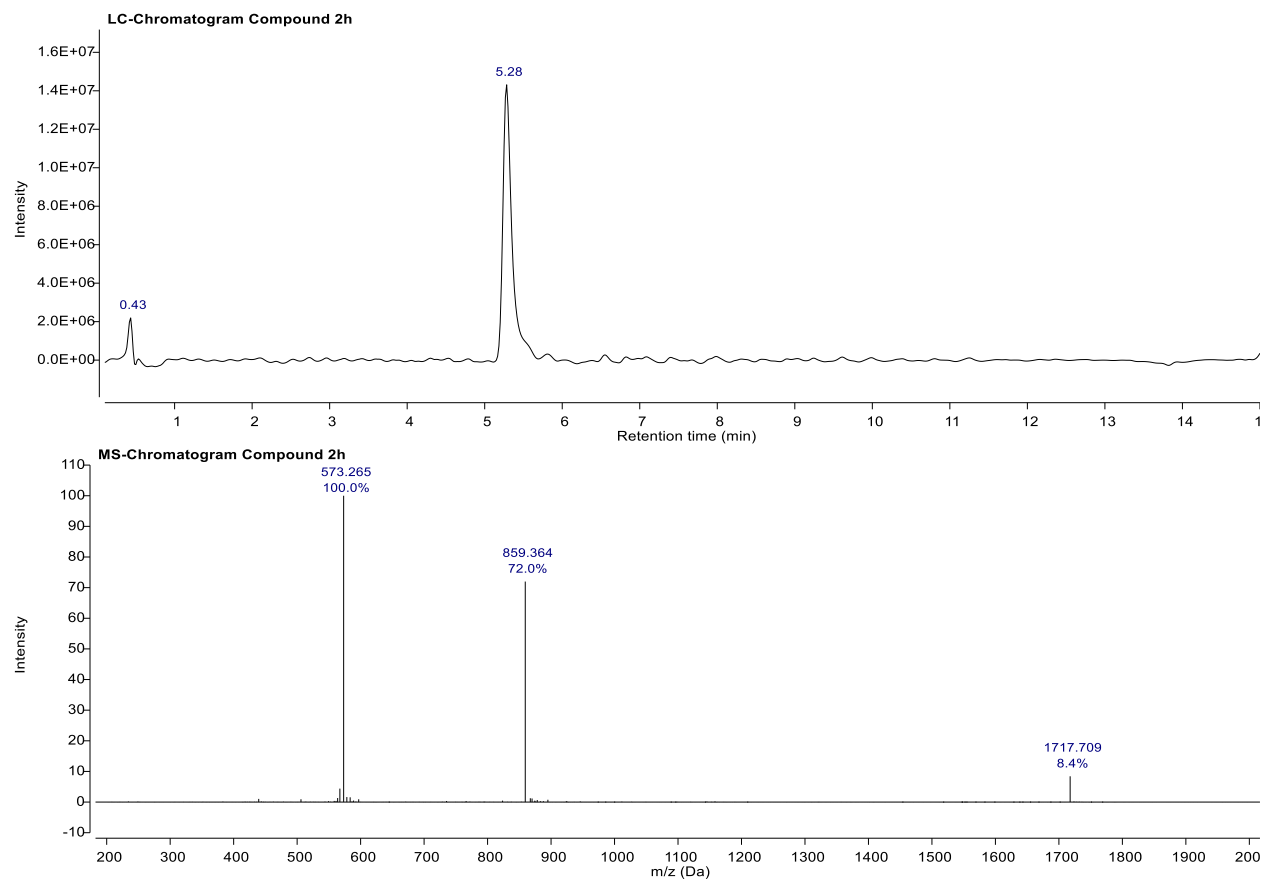

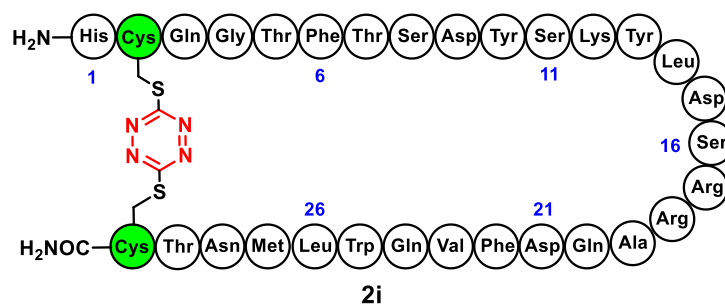

**Peptide 2i.** Peptide **1i** (7.2 mg, 2  $\mu$ mol) was subjected to the general phase-transfer protocol with 6M guanidine hydrochloride additive to construct **2i**, the salts were removed by dialysis and the crude reaction mixture was purified by reverse-phase HPLC (10 - 60% organic over 20 min) to give (1.5 mg, 21%) of an orange powder after lyophilization. MALDI-TOF Found  $m/z$  3677.277 [(M+H)<sup>+</sup>; calcd for C<sub>158</sub>H<sub>230</sub>N<sub>49</sub>O<sub>48</sub>S<sub>3</sub>: 3677.622].

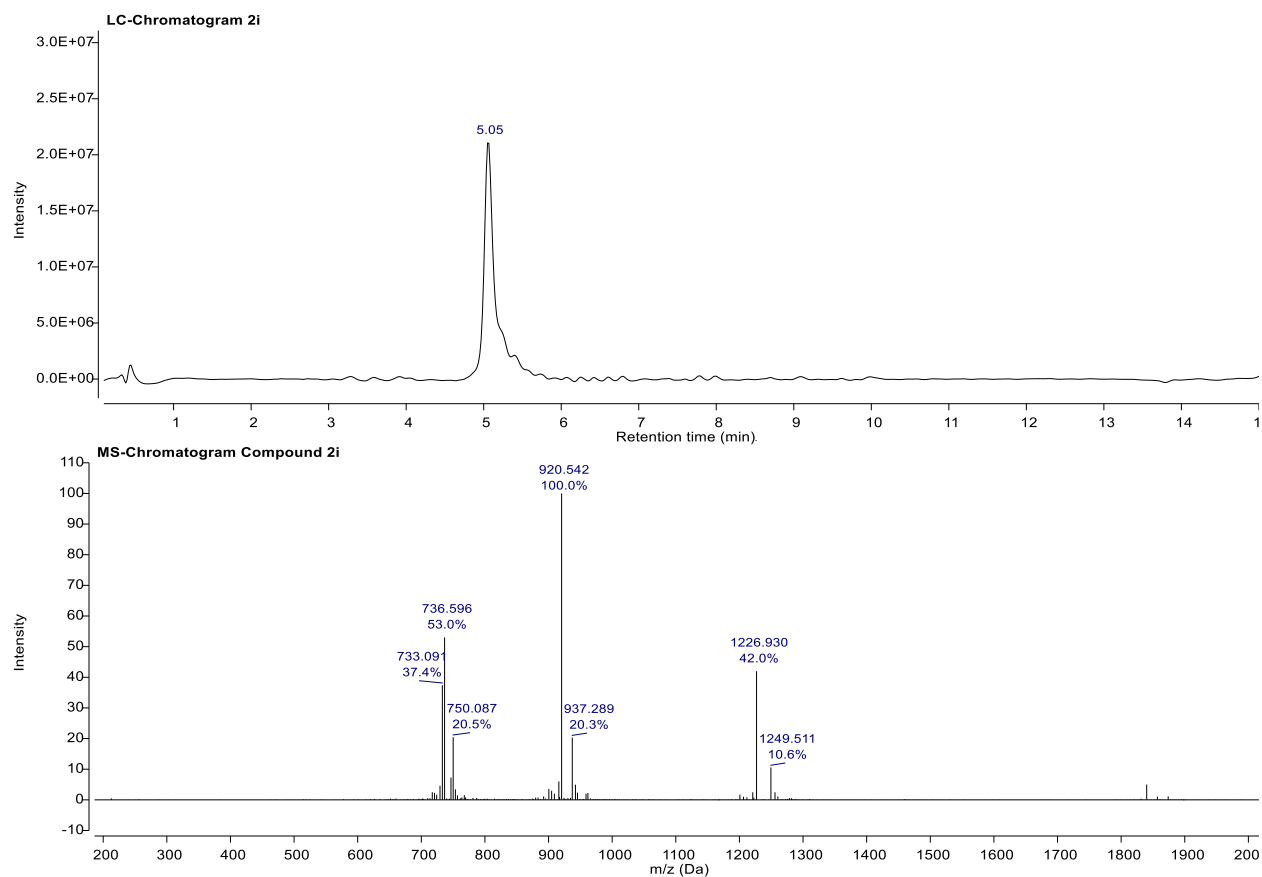

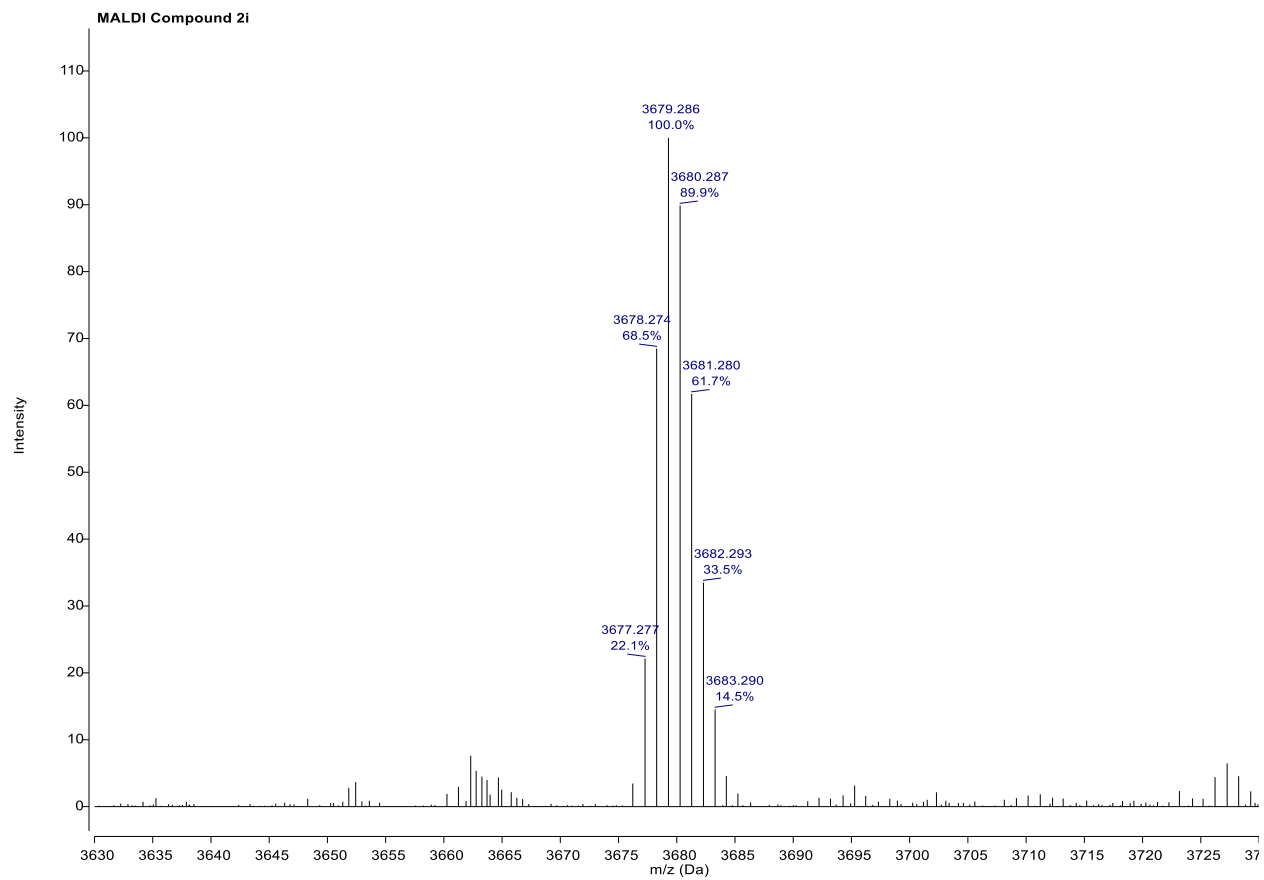

## General Procedure for Unstapling S,S-Tetrazine Peptides Photochemically

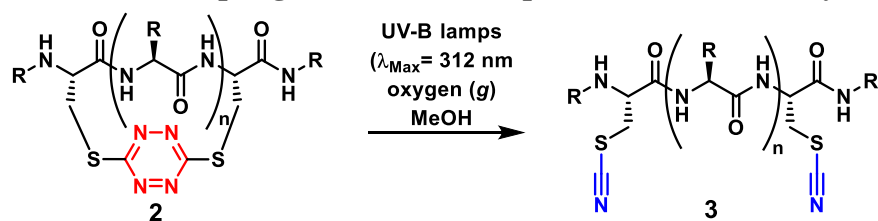

A 10 mL glass vial was charged with a solution of **2** in MeOH (1-2 mM). The contents were capped with a septum and sparged with oxygen gas for 15 minutes. The solution was then irradiated in a Rayonet<sup>®</sup> photoreactor equipped with six (7 watt) UV-B lamps ( $\lambda_{\text{Max}} = 312 \text{ nm}$ ) until the solution turned colorless. The MeOH was evaporated *in vacuo*, then redissolved in water and lyophilized to yield a white amorphous powder.

## Colormetric Change that Occurs After Irradiation in a Rayonet<sup>®</sup> Photoreactor

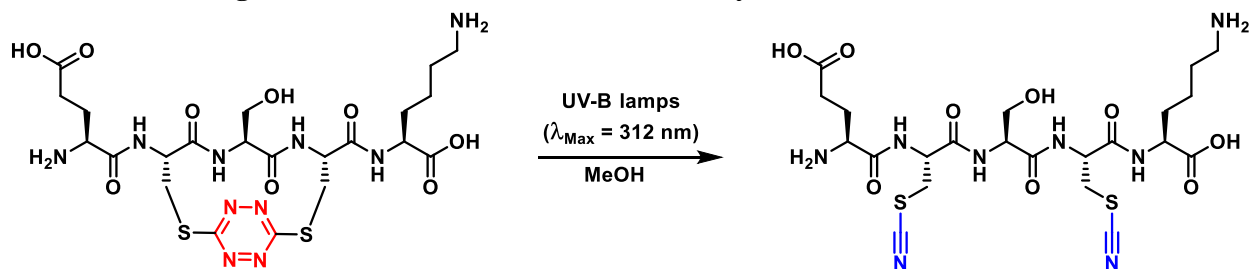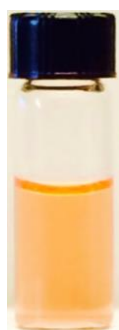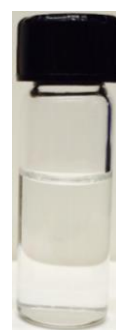

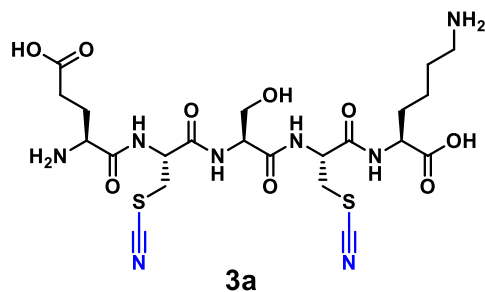

**Peptide 3a.** Peptide **2a** (10.0 mg, 15  $\mu\text{mol}$ ) was subjected to the general photochemical unstapling protocol to yield 9.4 mg (98%). HRMS (ES) Found  $m/z$  619.1961 [(M+H)<sup>+</sup>; calcd for C<sub>22</sub>H<sub>35</sub>N<sub>8</sub>O<sub>9</sub>S<sub>2</sub>: 619.1963]; <sup>1</sup>H NMR (500 MHz, Deuterium Oxide)  $\delta$  4.96 (dd,  $J = 7.4, 5.4$  Hz, 1H), 4.89 (dd,  $J = 7.9, 5.0$  Hz, 1H), 4.61 (t,  $J = 5.6$  Hz, 1H), 4.36 (dd,  $J = 8.6, 5.1$  Hz, 1H), 4.22 (t,  $J = 6.4$  Hz, 1H), 3.93 (d,  $J = 5.7$  Hz, 2H), 3.62 (ddd,  $J = 14.2, 5.2, 2.2$  Hz, 2H), 3.45 (ddd,  $J = 14.2, 8.8, 7.7$  Hz, 2H), 3.03 (t,  $J = 7.6$  Hz, 2H), 2.59 (t,  $J = 7.4$  Hz, 2H), 2.26 (q,  $J = 7.1$  Hz, 2H), 1.93 (ddd,  $J = 13.5, 8.3, 5.1$  Hz, 1H), 1.80 (td,  $J = 14.8, 14.2, 8.1$  Hz, 1H), 1.72 (pd,  $J = 7.2, 2.2$  Hz, 2H), 1.47 (p,  $J = 7.4, 6.8$  Hz, 2H); <sup>13</sup>C NMR (126 MHz, D<sub>2</sub>O)  $\delta$  177.7, 177.1, 172.8, 171.3, 171.1, 170.9, 115.4, 115.3, 62.5, 57.0, 54.6, 54.6, 54.5, 53.7, 40.6, 35.7, 35.6, 31.6, 30.5, 27.7, 27.3, 23.5; IR (KBr, cm<sup>-1</sup>) 3425(br), 3286(br), 3077(br), 2950(br), 2159(w), 1682(s), 1628(s), 1535(m), 1429(m), 1207(s), 1132(s).

#### Photochemical Unstapling with UV-A Lamps ( $\lambda_{\text{Max}} = 365$ nm)

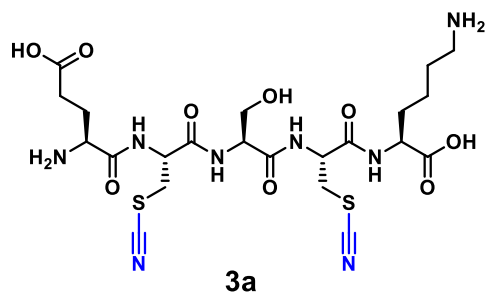

**Peptide 3a.** Peptide **2a** (15.0 mg, 23  $\mu\text{mol}$ ) was dissolved in MeOH (25 mL) and transferred to a thin-walled pyrex tube. The contents were then irradiated in a Rayonet photoreactor with twelve (7 watt) UV-A lamps ( $\lambda_{\text{Max}} = 365$  nm) for 24 hours, during which time the solution turned from red to colorless. The solvent was evaporated then redissolved in water and lyophilized to yield 13.8 mg (96%) of a white amorphous powder. Spectral data was identical to **3a** photolyzed with UV-B lamps.



# Gradient 5-60% MeCN, 7 min, 2mL/min

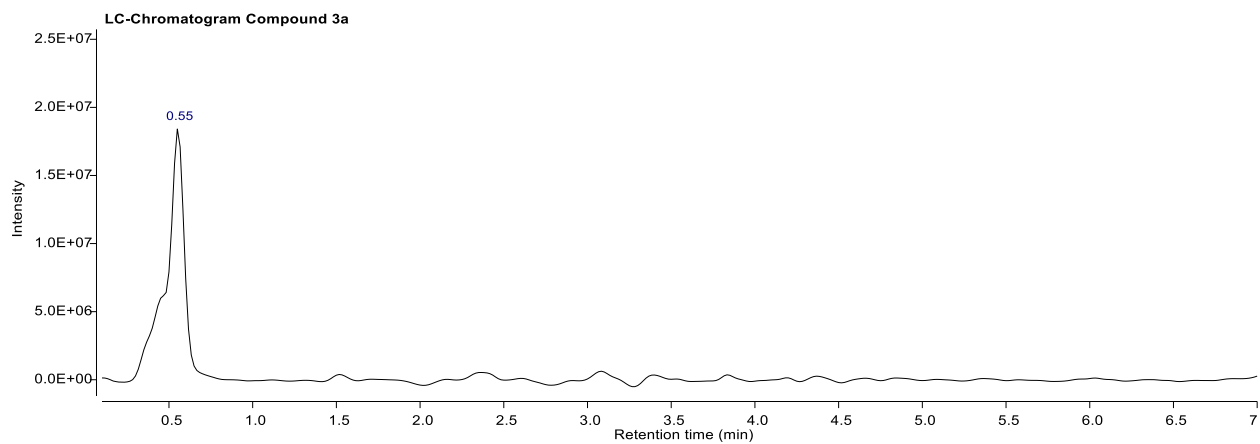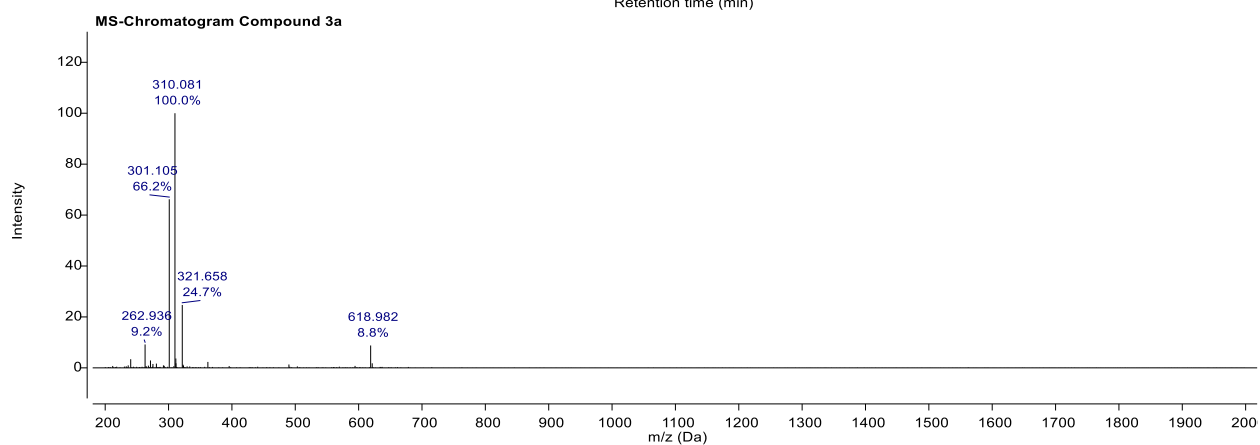

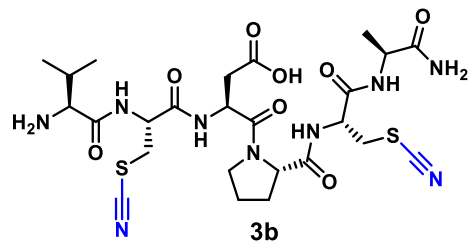

**Peptide 3b.** Peptide **2b** (1.5 mg, 2.2  $\mu\text{mol}$ ) was subjected to the general photochemical unstapling protocol to yield 1.4 mg (96%): HRMS (ES) Found  $m/z$  656.2283 [(M+H)<sup>+</sup>; calcd for C<sub>25</sub>H<sub>38</sub>N<sub>9</sub>O<sub>8</sub>S<sub>2</sub>: 656.2285]; <sup>1</sup>H NMR (500 MHz, DMSO-*d*<sub>6</sub>)  $\delta$  8.88 (d,  $J$  = 7.7 Hz, 1H), 8.84 (d,  $J$  = 7.9 Hz, 1H), 8.08 (d,  $J$  = 5.6 Hz, 3H), 7.98 (d,  $J$  = 8.0 Hz, 1H), 7.76 (d,  $J$  = 7.5 Hz, 1H), 7.14 (s, 1H), 7.02 (s, 1H), 4.85 (q,  $J$  = 7.1 Hz, 1H), 4.68 (q,  $J$  = 7.7 Hz, 1H), 4.51 (td,  $J$  = 8.6, 4.4 Hz, 1H), 4.29 (dd,  $J$  = 8.6, 3.6 Hz, 1H), 4.14 (p,  $J$  = 7.3 Hz, 1H), 3.67 (dt,  $J$  = 10.8, 5.8 Hz, 4H), 3.55 (dd,  $J$  = 13.5, 4.6 Hz, 2H), 3.45 (dd,  $J$  = 13.5, 5.4 Hz, 1H), 3.27 (dd,  $J$  = 13.3, 9.2 Hz, 1H), 3.20 (dd,  $J$  = 13.4, 8.1 Hz, 1H), 2.81 (dd,  $J$  = 16.9, 6.6 Hz, 1H), 2.09 (dt,  $J$  = 9.2, 4.5 Hz, 2H), 1.95 (tq,  $J$  = 10.2, 5.9, 5.3 Hz, 2H), 1.89 (dd,  $J$  = 11.3, 5.0 Hz, 1H), 1.24 (d,  $J$  = 7.0 Hz, 3H), 0.93 (dd,  $J$  = 12.7, 6.9 Hz, 6H); <sup>13</sup>C NMR (126 MHz, DMSO-*d*<sub>6</sub>)  $\delta$  173.6, 172.0, 171.7, 169.2, 168.0, 167.8, 167.6, 113.0, 112.4, 60.2, 57.2, 52.8, 52.1, 48.4, 47.7, 46.9, 35.7, 34.9, 34.9, 29.8, 28.8, 24.2, 18.2, 17.8, 17.3; IR (KBr, cm<sup>-1</sup>) 3323(br), 3067(m), 2974(m), 2160(w), 1669(s), 1525(m), 1202(m).

# Gradient 5-60% MeCN, 7 min, 2mL/min

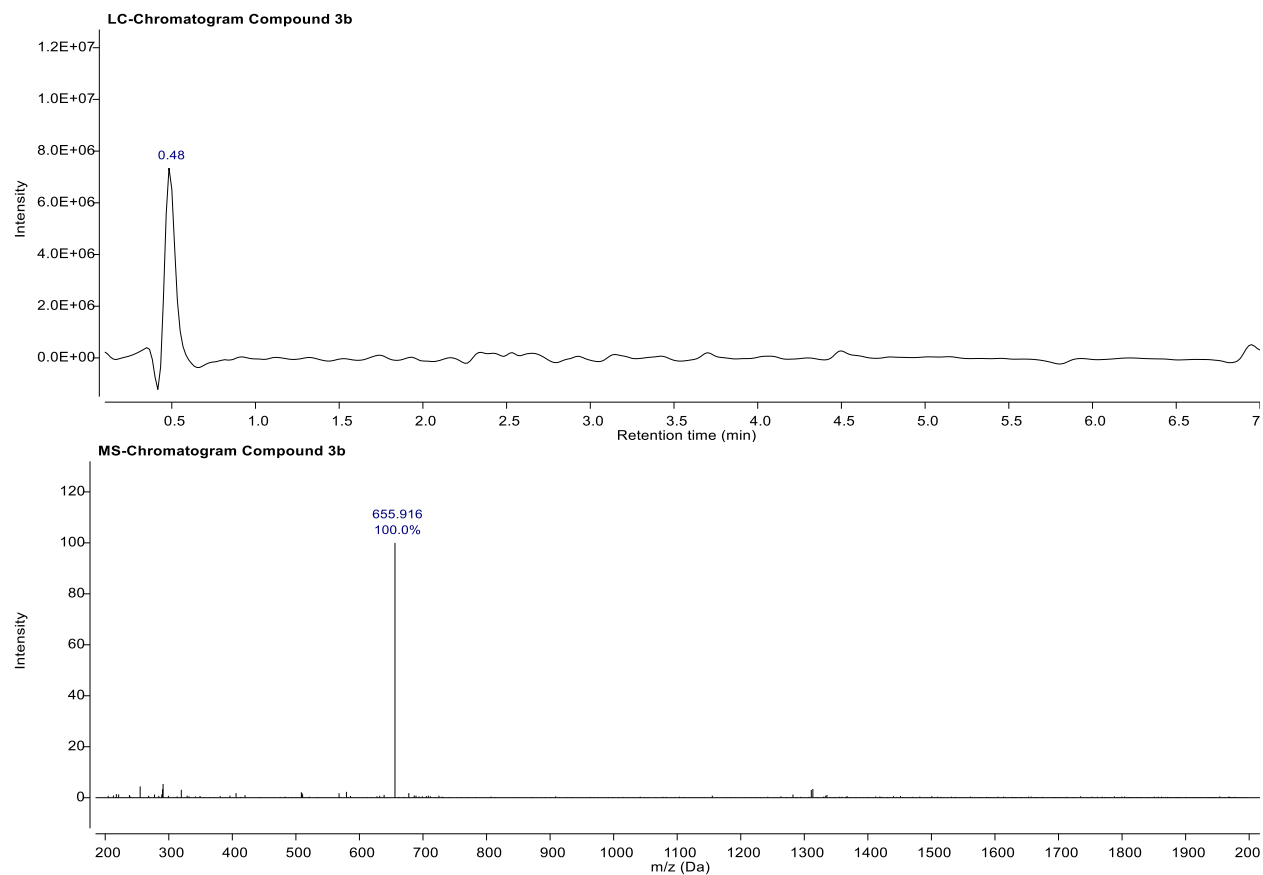

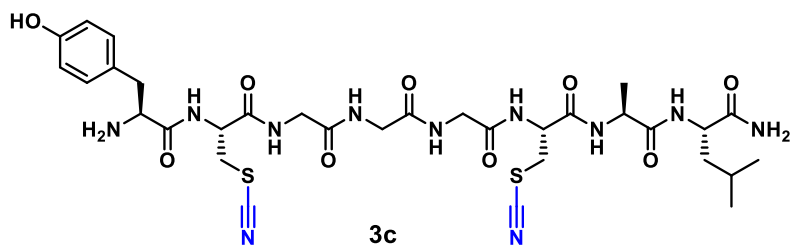

**Peptide 3c.** Peptide **2c** (2.8 mg, 3.4  $\mu\text{mol}$ ) was subjected to the general photochemical unstapling protocol to yield 2.6 mg (97%): HRMS Found (ES)  $m/z$  792.2917 [(M+H)<sup>+</sup>; calcd for C<sub>32</sub>H<sub>46</sub>N<sub>11</sub>O<sub>9</sub>S<sub>2</sub>: 792.2921]; <sup>1</sup>H NMR (500 MHz, DMSO-*d*<sub>6</sub>)  $\delta$  9.34 (s, 1H), 9.06 (d,  $J$  = 8.0 Hz, 1H), 8.52 (t,  $J$  = 5.7 Hz, 1H), 8.39 (d,  $J$  = 8.2 Hz, 1H), 8.33 (d,  $J$  = 7.2 Hz, 1H), 8.19 (dt,  $J$  = 11.2, 5.8 Hz, 2H), 8.08 (s, 3H), 7.77 (d,  $J$  = 8.4 Hz, 1H), 7.23 (s, 1H), 7.05 (d,  $J$  = 8.4 Hz, 2H), 6.96 (s, 1H), 6.71 (d,  $J$  = 8.4 Hz, 2H), 4.82 – 4.70 (m, 1H), 4.66 (td,  $J$  = 8.3, 4.7 Hz, 1H), 4.26 – 4.16 (m, 2H), 3.99 (d,  $J$  = 8.0 Hz, 1H), 3.89 – 3.71 (m, 6H), 3.67 – 3.58 (m, 1H), 3.49 (td,  $J$  = 13.5, 4.9 Hz, 2H), 3.27 (dd,  $J$  = 13.5, 7.8 Hz, 1H), 3.22 – 3.17 (m, 1H), 3.04 (dd,  $J$  = 14.3, 5.0 Hz, 1H), 2.82 (dd,  $J$  = 14.3, 8.2 Hz, 1H), 1.58 (dt,  $J$  = 13.5, 6.6 Hz, 1H), 1.45 (t,  $J$  = 7.2 Hz, 2H), 1.23 (d,  $J$  = 7.2 Hz, 3H), 0.86 (dd,  $J$  = 20.4, 6.6 Hz, 6H); <sup>13</sup>C NMR (126 MHz, DMSO-*d*<sub>6</sub>)  $\delta$  174.4, 171.9, 169.6, 169.5, 168.6, 168.5, 156.8, 130.8, 124.8, 115.6, 113.1, 54.0, 52.5, 52.4, 51.1, 49.1, 41.7, 41.5, 41.4, 41.1, 36.3, 35.6, 35.5, 24.5, 23.3, 21.8, 17.9; IR (KBr, cm<sup>-1</sup>) 3294(br), 3067(br), 2962(m), 2159(w), 1676(s), 1518(s), 1431(w), 1205(m), 1136(m).

**Gradient 5-60% MeCN, 7 min, 2mL/min**

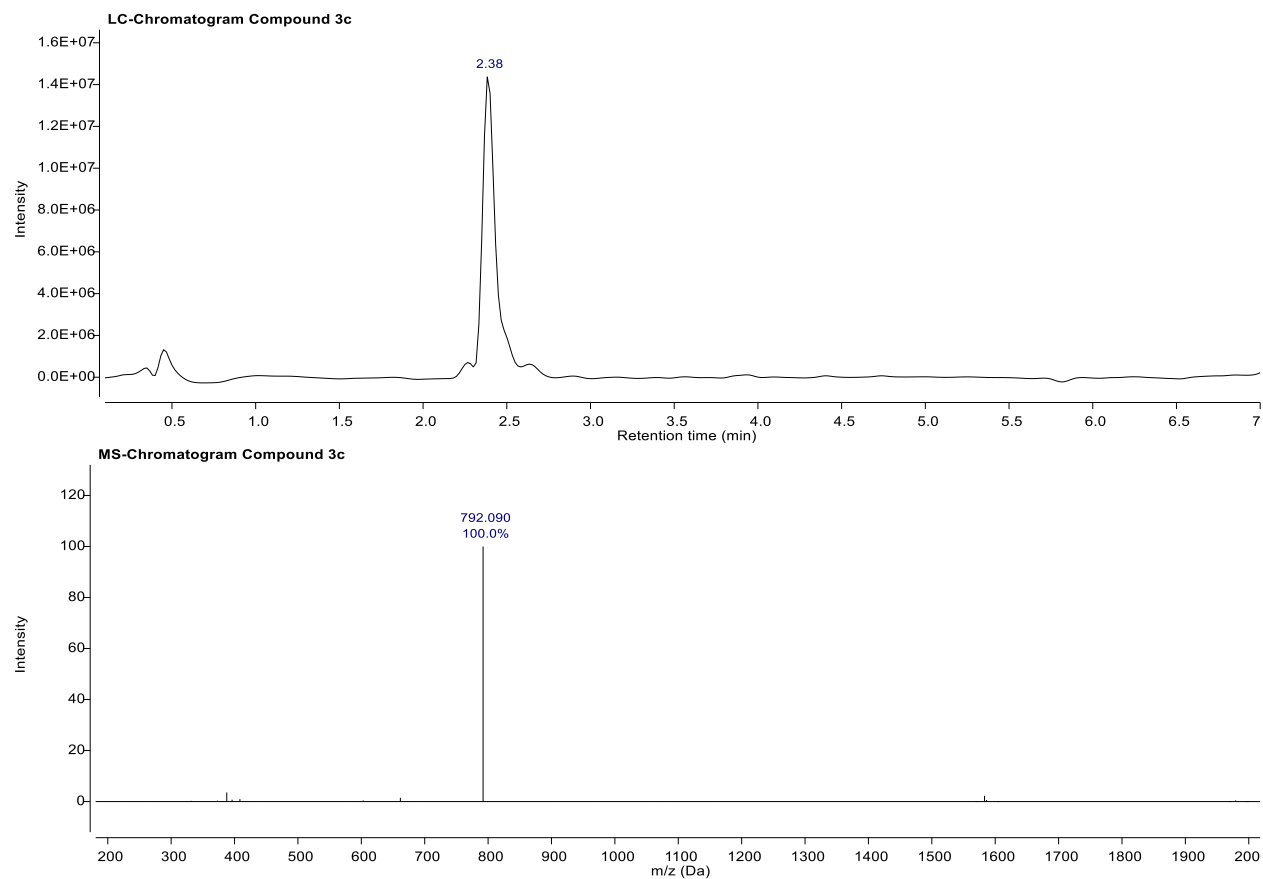

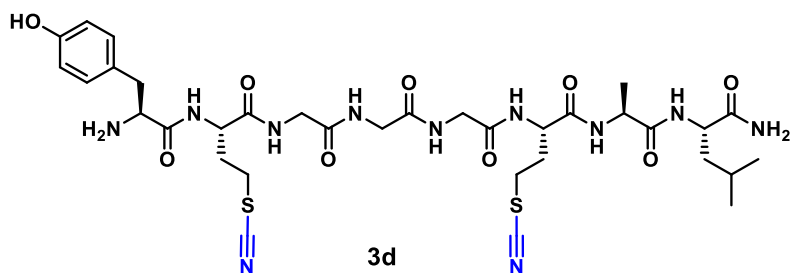

**Peptide 3d.** Peptide **2d** (3.2 mg, 3.8  $\mu\text{mol}$ ) was subjected to the general photochemical unstapling protocol to yield 3.0 mg (96%). HRMS Found (ES)  $m/z$  820.3257 [(M+H)<sup>+</sup>; calcd for C<sub>34</sub>H<sub>50</sub>N<sub>11</sub>O<sub>9</sub>S<sub>2</sub>: 820.3234]; <sup>1</sup>H NMR (500 MHz, DMSO-*d*<sub>6</sub>)  $\delta$  9.33 (s, 1H), 8.32 (t,  $J$  = 5.6 Hz, 1H), 8.25 (d,  $J$  = 7.2 Hz, 1H), 8.22 (d,  $J$  = 5.7 Hz, 1H), 8.19 – 8.13 (m, 1H), 7.80 (d,  $J$  = 8.3 Hz, 1H), 7.73 – 7.69 (m, 2H), 7.68 (d,  $J$  = 5.1 Hz, 1H), 7.29 (s, 1H), 7.02 (d,  $J$  = 8.1 Hz, 2H), 6.98 (s, 1H), 6.69 (d,  $J$  = 8.1 Hz, 2H), 6.56 (s, 1H), 4.55 – 4.47 (m, 1H), 4.44 (dd,  $J$  = 13.5, 8.1 Hz, 1H), 4.33 – 4.16 (m, 2H), 4.13 (t,  $J$  = 5.4 Hz, 1H), 3.83 (dd,  $J$  = 16.6, 5.7 Hz, 1H), 3.79 – 3.68 (m, 4H), 3.13 – 2.99 (m, 3H), 2.93 (dd,  $J$  = 14.5, 4.7 Hz, 1H), 2.82 – 2.65 (m, 1H), 2.21 – 2.10 (m, 1H), 2.10 – 2.04 (m, 1H), 2.04 – 1.92 (m, 2H), 1.69 – 1.53 (m, 2H), 1.44 (dt,  $J$  = 9.2, 4.5 Hz, 2H), 1.39 – 1.31 (m, 1H), 1.21 (d,  $J$  = 7.1 Hz, 3H), 0.87 (d,  $J$  = 6.3 Hz, 3H), 0.83 (d,  $J$  = 6.6 Hz, 3H); <sup>13</sup>C NMR (126 MHz, DMSO)  $\delta$  173.9, 171.6, 170.0, 169.1, 168.8, 168.8, 166.9, 156.3, 131.7, 131.5, 130.3, 128.6, 115.2, 112.9, 112.8, 67.4, 50.9, 50.8, 48.4, 42.0, 41.9, 41.0, 38.1, 29.8, 29.8, 28.3, 24.1, 23.2, 23.0, 22.3, 21.5, 17.6, 13.8, 10.8; IR (KBr, cm<sup>-1</sup>) 3409(br), 2928(w), 2159(w), 1671(s), 1541(m), 1205(m), 1180(w), 1134(w).

### Gradient 5-60% MeCN, 7 min, 2mL/min

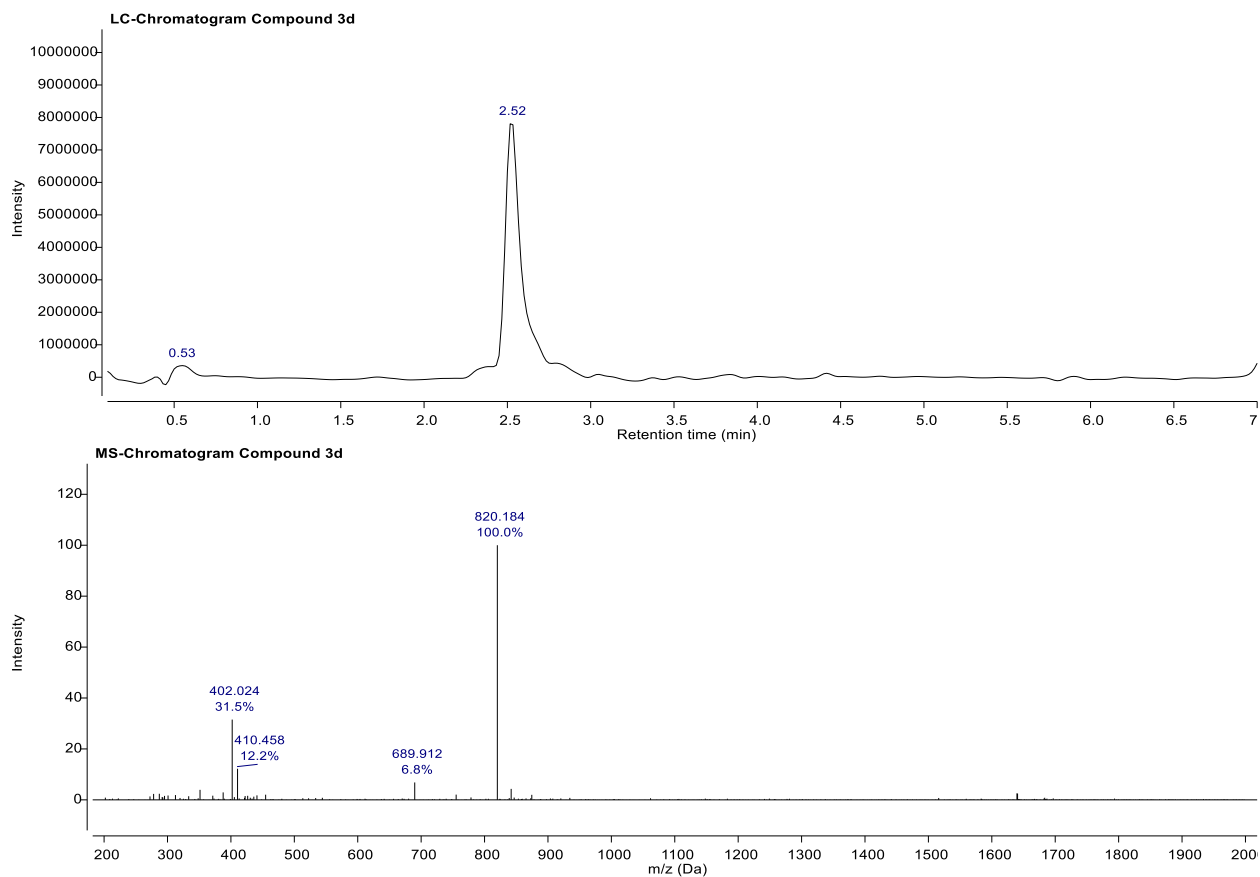

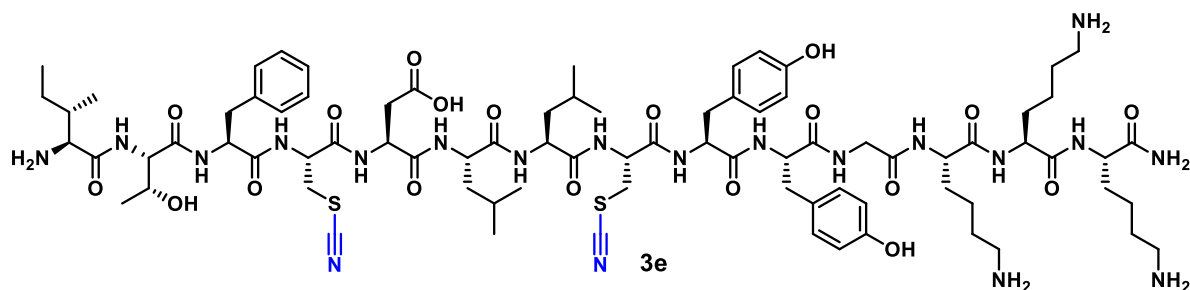

**Peptide 3e.** Peptide **2e** (4.0 mg, 2.3  $\mu\text{mol}$ ) was subjected to the general photochemical unstapling protocol to yield 3.9 mg (99%): MALDI-TOF Found  $m/z$  1743.230  $[(M+H)^+]$ ; calcd for  $\text{C}_{81}\text{H}_{123}\text{N}_{20}\text{O}_{19}\text{S}_2$ : 1743.871];  $^1\text{H}$  NMR (500 MHz,  $\text{DMSO}-d_6$ )  $\delta$  9.21 (d,  $J = 12.0$  Hz, 1H), 8.57 (d,  $J = 7.4$  Hz, 1H), 8.32 (d,  $J = 8.3$  Hz, 1H), 8.23 – 8.17 (m, 1H), 8.15 (d,  $J = 7.8$  Hz, 1H), 8.13 – 8.00 (m, 4H), 7.97 (d,  $J = 7.6$  Hz, 1H), 7.92 (d,  $J = 8.1$  Hz, 1H), 7.86 (d,  $J = 7.7$  Hz, 1H), 7.80 (s, 7H), 7.40 (s, 1H), 7.21 (d,  $J = 6.7$  Hz, 3H), 7.16 (d,  $J = 6.3$  Hz, 1H), 7.07 (s, 1H), 7.02 (d,  $J = 8.4$  Hz, 2H), 6.92 (d,  $J = 8.2$  Hz, 2H), 6.64 (d,  $J = 8.1$  Hz, 2H), 6.60 (d,  $J = 8.3$  Hz, 2H), 5.42 (s, 1H), 5.22 – 5.14 (m, 1H), 5.01 (d,  $J = 4.0$  Hz, 1H), 4.66 – 4.57 (m, 3H), 4.55 (t,  $J = 7.0$  Hz, 1H), 4.49 (d,  $J = 3.6$  Hz, 1H), 4.44 (d,  $J = 6.6$  Hz, 1H), 4.43 – 4.38 (m, 1H), 4.37 – 4.24 (m, 3H), 4.23 – 4.17 (m, 1H), 4.17 – 4.09 (m, 1H), 4.03 (q,  $J = 6.8$  Hz, 1H), 3.98 – 3.90 (m, 1H), 3.81 – 3.68 (m, 2H), 3.15 (dd,  $J = 13.3, 8.7$  Hz, 1H), 3.07 (dd,  $J = 14.5, 3.3$  Hz, 1H), 2.91 (d,  $J = 11.3$  Hz, 1H), 2.83 (dd,  $J = 13.9, 9.1$  Hz, 1H), 2.75 (s, 6H), 2.65 – 2.62 (m, 1H), 1.78 – 1.39 (m, 17H), 1.31 (s, 5H), 1.23 (d,  $J = 6.8$  Hz, 3H), 1.05 (d,  $J = 6.3$  Hz, 3H), 0.86 (t,  $J = 6.8$  Hz, 5H), 0.84 – 0.73 (m, 11H);  $^{13}\text{C}$  NMR (126 MHz,  $\text{DMSO}$ )  $\delta$  176.4, 173.5, 171.8, 171.7, 171.6, 171.4, 171.3, 171.2, 170.6, 169.7, 169.2, 168.7, 168.4, 167.9, 167.9, 155.9, 155.8, 137.4, 130.1, 130.1, 129.2, 128.0, 127.7, 127.4, 126.3, 114.9, 114.9, 72.5, 67.0, 65.8, 63.1, 57.9, 56.3, 54.6, 53.6, 52.6, 52.6, 52.3, 52.3, 52.3, 52.2, 52.2, 52.1, 51.2, 51.2, 51.2, 51.1, 49.8, 38.7, 36.3, 31.5, 26.7, 26.6, 24.1, 23.9, 23.2, 23.1, 22.3, 22.2, 21.7, 21.6, 20.5, 19.4, 14.5, 11.1; IR (KBr,  $\text{cm}^{-1}$ ) 3298(br), 3071(br), 2962(m), 2933(m), 2159(w), 1671(s), 1517(m), 1438(m), 1203(s), 1137(m).



**Gradient 5-60% MeCN, 10 min, 2mL/min**

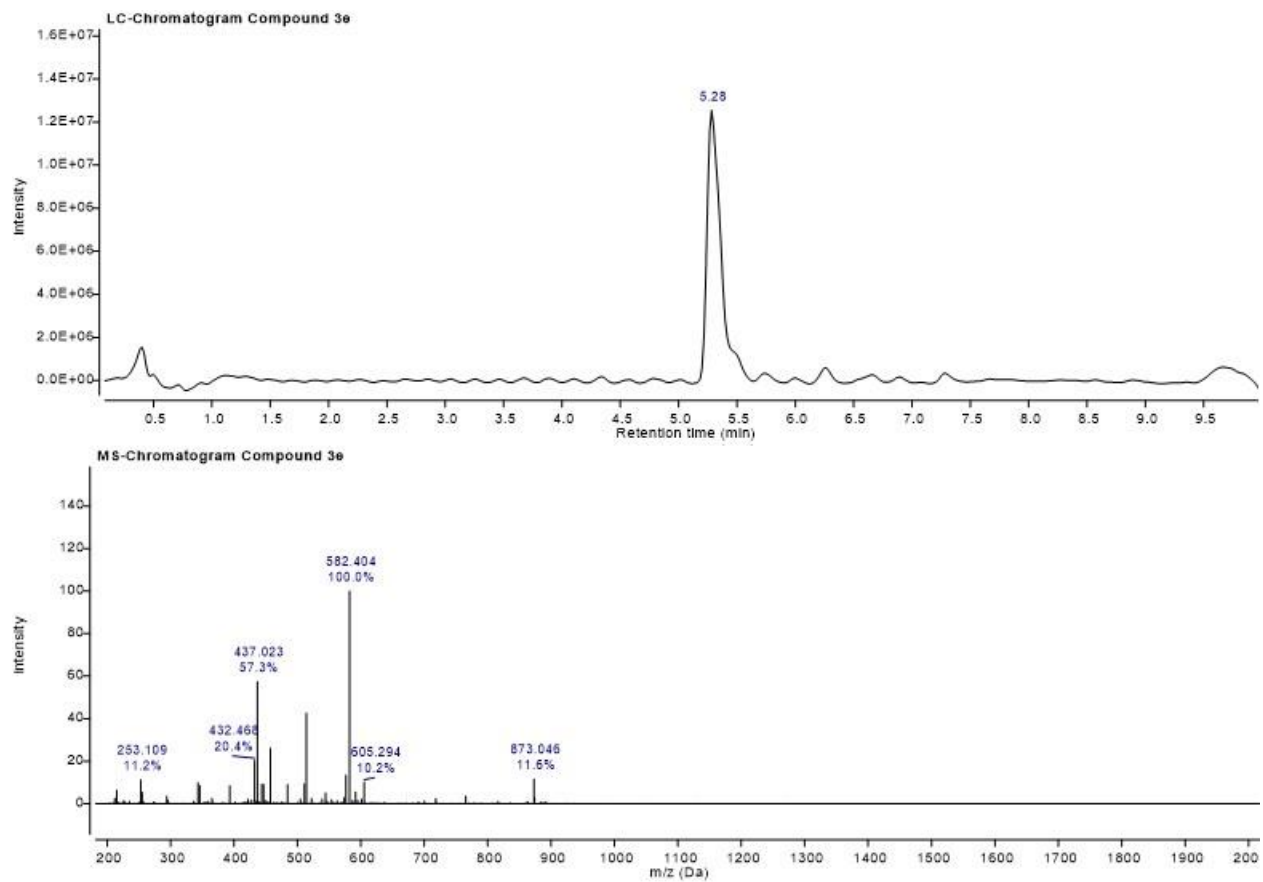

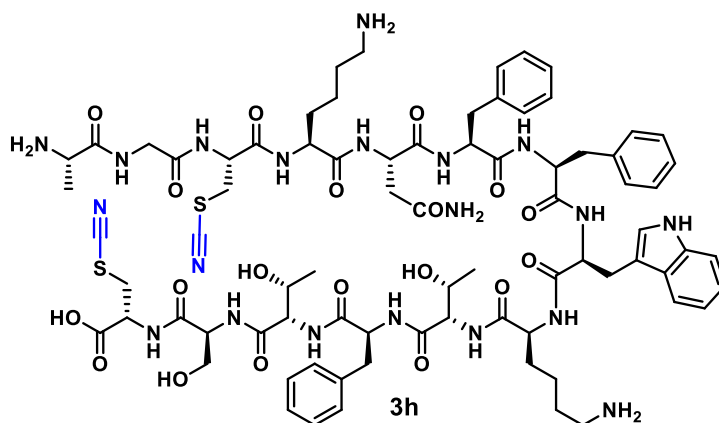

**Peptide 3h.** Peptide **2h** (8.3 mg, 5.1  $\mu\text{mol}$ ) was subjected to the general photochemical unstapling protocol, without sparging with oxygen gas (atmospheric oxygen was not excluded). The crude reaction mixture was purified by reverse-phase HPLC (gradient 10-60% organic over 15 min) to yield 2.1 mg (38%) of a white powder after lyophilization. MALDI-TOF  $m/z$  1689.333 [(M+H)<sup>+</sup>; calcd for C<sub>78</sub>H<sub>105</sub>N<sub>20</sub>O<sub>19</sub>S<sub>2</sub>: 1689.730]; <sup>1</sup>H NMR (500 MHz, DMSO-*d*<sub>6</sub>)  $\delta$  10.77 (s, 1H), 8.67 (t,  $J$  = 5.7 Hz, 1H), 8.48 (d,  $J$  = 8.0 Hz, 1H), 8.34 (d,  $J$  = 8.0 Hz, 1H), 8.21 – 8.01 (m, 6H), 8.01 – 7.86 (m, 5H), 7.86 – 7.65 (m, 6H), 7.61 (d,  $J$  = 7.9 Hz, 1H), 7.50 – 7.41 (m, 2H), 7.32 (d,  $J$  = 7.9 Hz, 1H), 7.27 – 7.08 (m, 15H), 7.05 (t,  $J$  = 7.5 Hz, 1H), 7.00 (d,  $J$  = 9.7 Hz, 1H), 6.97 (d,  $J$  = 7.4 Hz, 1H), 4.88 (d,  $J$  = 4.5 Hz, 1H), 4.72 – 4.60 (m, 1H), 4.57 (d,  $J$  = 5.8 Hz, 1H), 4.54 – 4.42 (m, 2H), 4.42 – 4.26 (m, 4H), 4.21 (dd,  $J$  = 8.6, 3.9 Hz, 2H), 4.10 – 3.93 (m, 1H), 3.94 – 3.82 (m, 3H), 3.74 – 3.57 (m, 1H), 3.53 – 3.43 (m, 1H), 3.19 (dd,  $J$  = 13.7, 8.8 Hz, 2H), 3.14 – 3.06 (m, 1H), 3.03 – 2.95 (m, 2H), 2.94 – 2.88 (m, 1H), 2.88 – 2.76 (m, 2H), 2.71 (t,  $J$  = 7.3 Hz, 4H), 2.41 – 2.32 (m, 1H), 1.71 – 1.60 (m, 1H), 1.58 – 1.41 (m, 7H), 1.36 (d,  $J$  = 6.9 Hz, 3H), 1.32 – 1.18 (m, 5H), 1.14 (d,  $J$  = 6.9 Hz, 1H), 1.04 (d,  $J$  = 6.2 Hz, 3H), 0.97 (d,  $J$  = 6.4 Hz, 3H); <sup>13</sup>C NMR (126 MHz, DMSO)  $\delta$  171.8, 171.3, 171.2, 170.9, 170.8, 170.8, 170.6, 170.5, 170.3, 170.1, 169.8, 169.7, 169.7, 168.6, 168.4, 137.7, 137.6, 137.5, 136.0, 129.2, 129.2, 129.0, 128.0, 127.9, 127.3, 126.1, 126.1, 123.6, 120.8, 118.5, 118.4, 118.2, 116.1, 112.9, 111.2, 109.8, 70.5, 70.4, 66.6, 61.4, 57.9, 57.8, 54.1, 53.9, 53.7, 53.3, 53.3, 52.5, 52.3, 52.3, 49.5, 48.1, 41.8, 38.7, 37.3, 37.3, 37.2, 37.2, 37.2, 37.0, 35.6, 31.1, 26.6, 26.6, 22.1, 22.1, 19.3, 19.3, 17.1; IR (KBr, cm<sup>-1</sup>) 3424(br), 2933(w), 2159(w), 1671(s), 1632(s), 1526(m), 1204(w), 1136(w).

# Gradient 5-60% MeCN, 10 min, 2mL/min

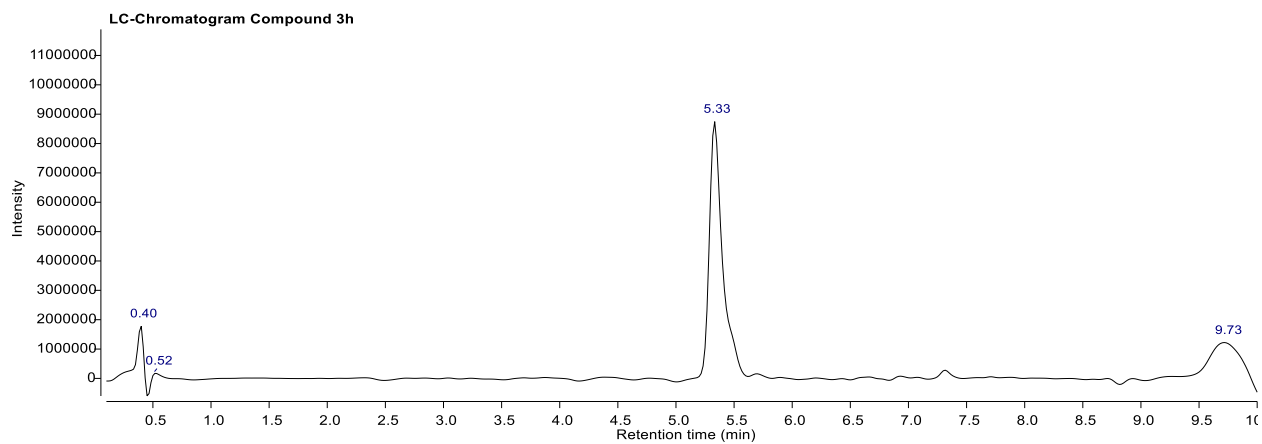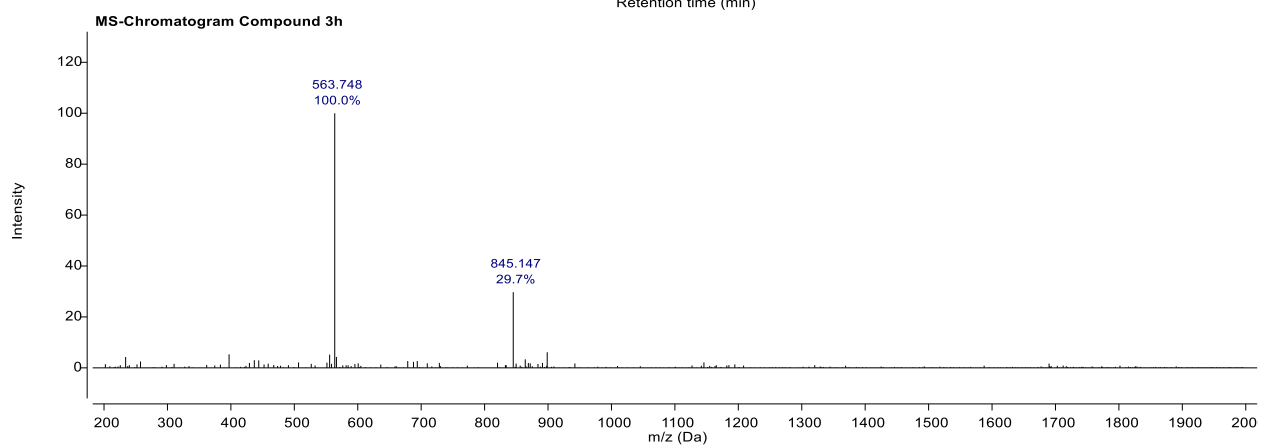

### General Nitrile Removal Protocol: Regeneration of the Native Peptide

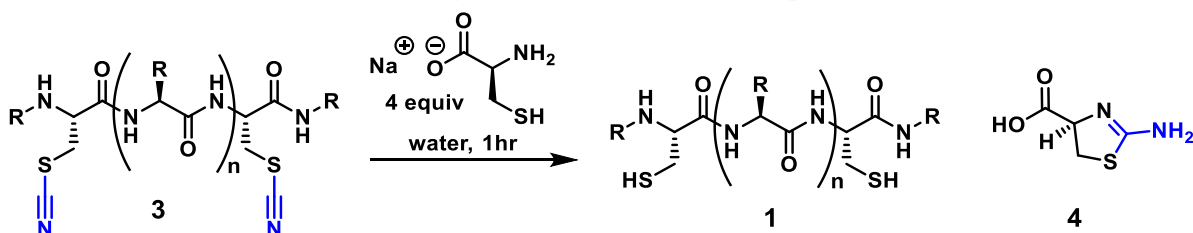

A 13 mm test tube was charged with peptide **3** (1-5 mg) and dissolved in water (1.0 mL). To this solution was added 4 equivalents of a pre-mixed 250 mM solution of sodium cysteine [prepared by dissolving cysteine (121 mg, 1.0 mmol) in 0.25M NaOH (4 mL, 1 equiv)]. The contents were stirred for 1 hour, then formic acid (4-8 equiv) was added and the reaction solution was purified by reverse-phase high-pressure liquid chromatography (HPLC) to yield peptide **1** as a white lyophilized powder and **4** was also separated from the reaction.

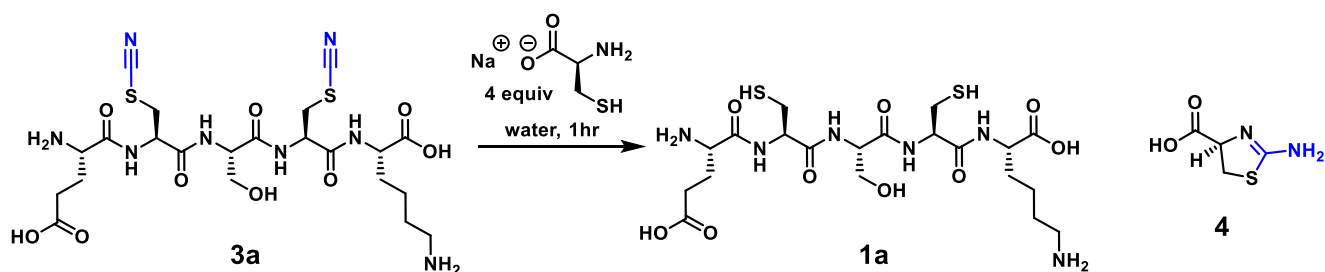

**Regeneration of 1a.** Peptide **3a** (6.2 mg, 10.0  $\mu\text{mol}$ ) was subjected to the general nitrile removal protocol then purified by reverse-phase HPLC (5 - 15% organic over 5 min) to yield 4.9 mg (87%) of peptide **1a** as a white lyophilized powder and 1.3 mg (45%) **4** is also separated from the reaction.

**Comparison of the Regenerated (Top) and Native (Bottom) Peptides: Gradient 5-60% MeCN, 7 min, 2mL/min**

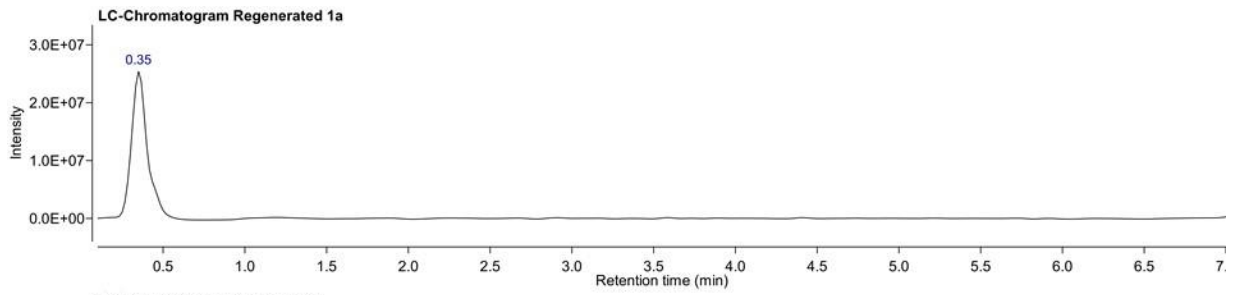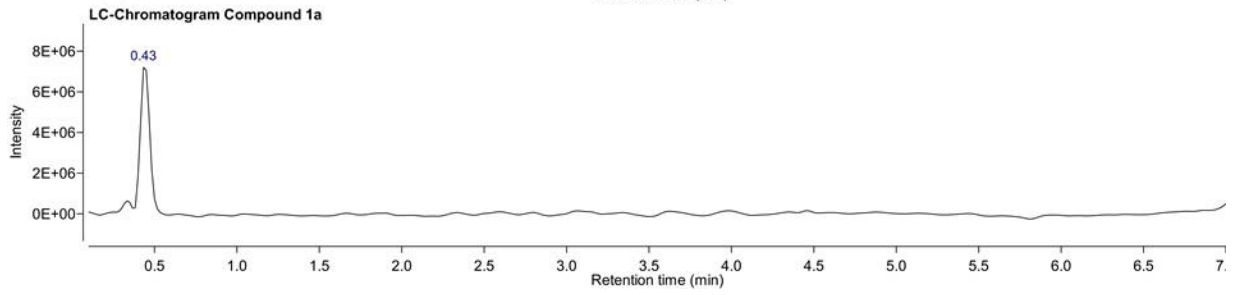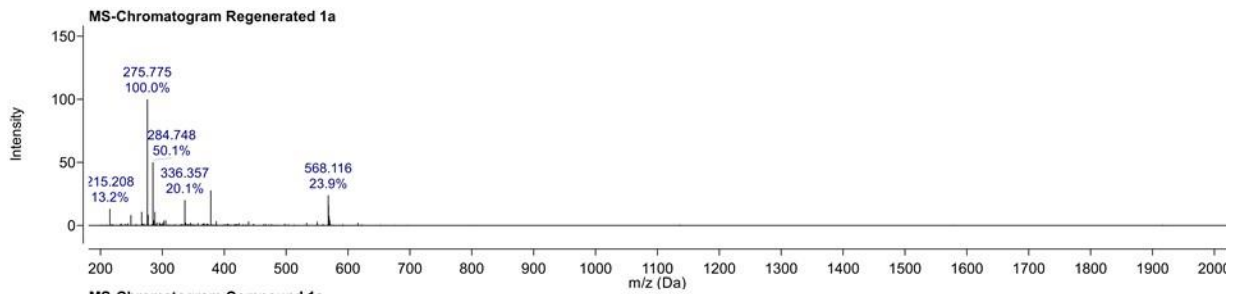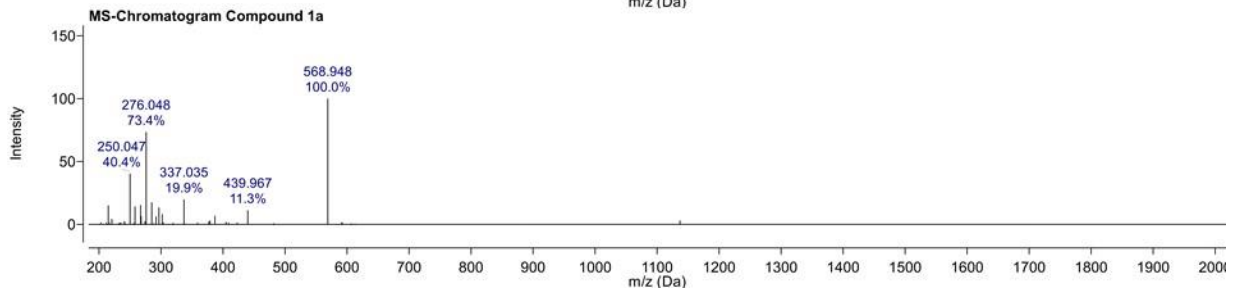

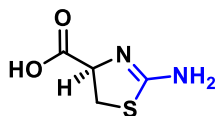

4

**(R)-2-amino-4,5-dihydrothiazole-4-carboxylic acid (4):** HRMS Found (ES)  $m/z$  147.0228 [(M+H)<sup>+</sup>; calcd for C<sub>4</sub>H<sub>6</sub>N<sub>2</sub>O<sub>2</sub>S: 147.0228]; <sup>1</sup>H NMR (500 MHz, Deuterium Oxide)  $\delta$  4.75 (dd,  $J = 8.8, 5.0$  Hz, 1H), 3.92 (dd,  $J = 11.3, 8.9$  Hz, 1H), 3.69 (dd,  $J = 11.4, 5.0$  Hz, 1H); <sup>13</sup>C NMR (126 MHz, Deuterium Oxide)  $\delta$  175.5, 173.9, 63.8, 34.7; IR (KBr, cm<sup>-1</sup>) 3153(br), 2980(br), 22840(br), 2347(m), 2281(m), 2222(m), 1638(s), 1588(s), 1442(m), 1392(s), 1290(m).

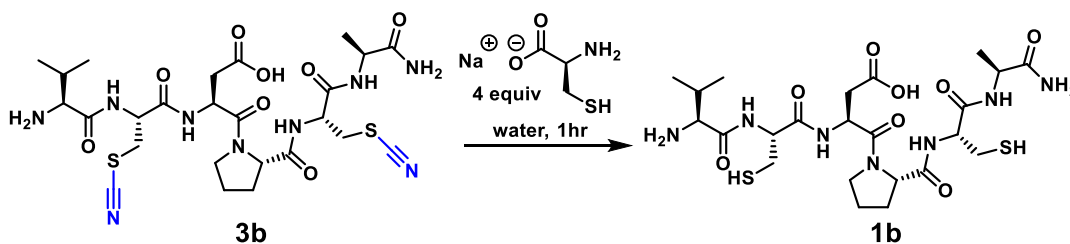

**Regeneration of 1b.** Peptide **3b** (1.1 mg, 1.7  $\mu$ mol) was subjected to the general nitrile removal protocol then purified by reverse-phase HPLC (5 - 35% organic over 12 min) to yield 0.7 mg (68%) of peptide **1b** as a white lyophilized powder.

**Comparison of the Regenerated (Top) and Native (Bottom) Peptides: Gradient 5-60% MeCN, 7 min, 2mL/min**

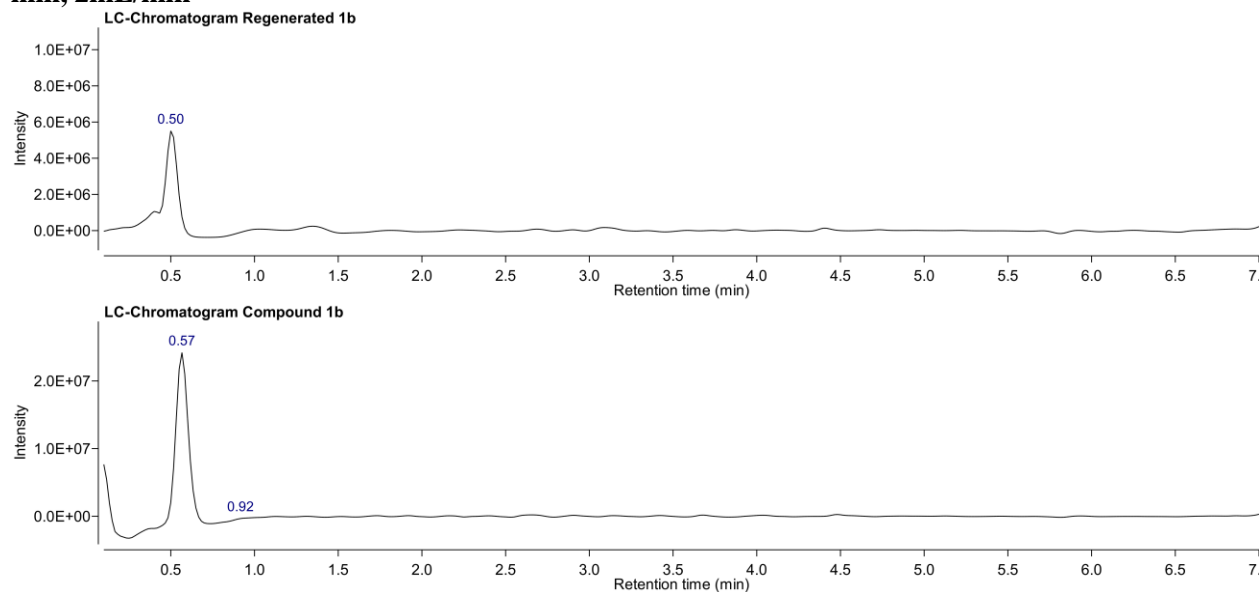

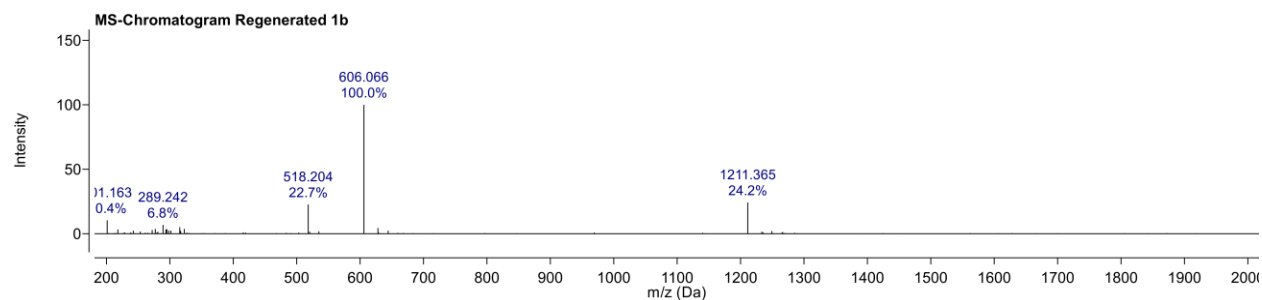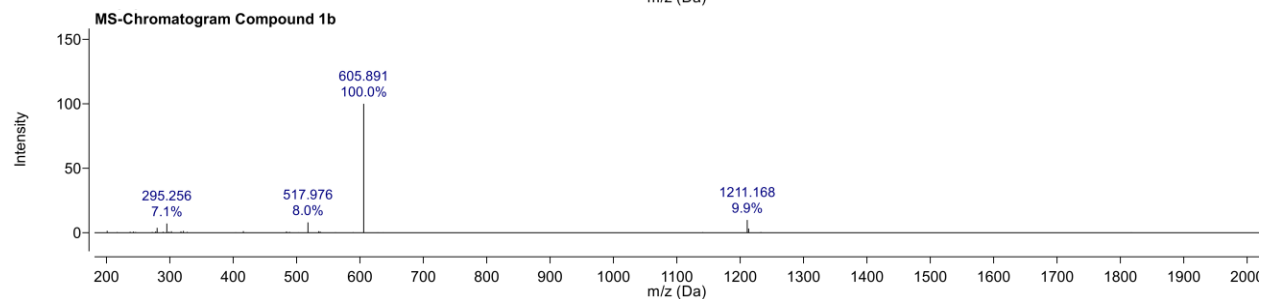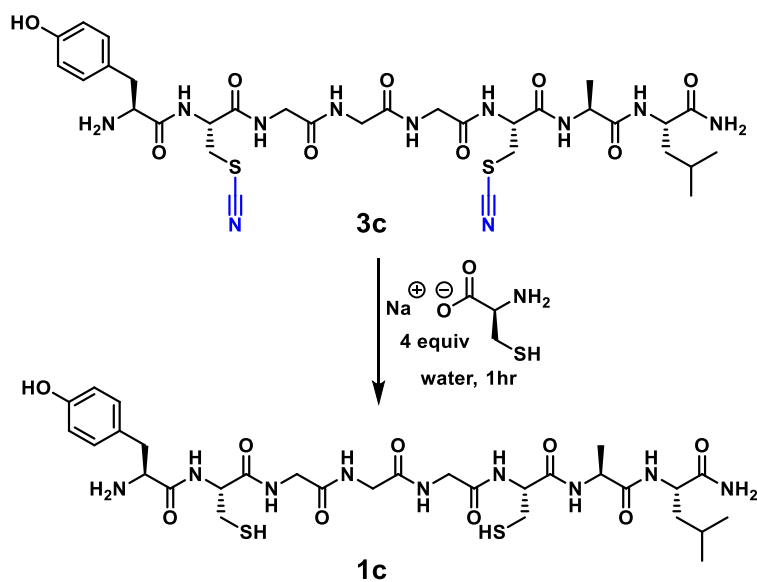

**Regeneration of 1c.** Peptide **3c** (1.5 mg, 1.9  $\mu\text{mol}$ ) was subjected to the general nitrile removal protocol then purified by reverse-phase HPLC (5 - 60% organic over 12 min) to yield 1.1 mg (78%) of peptide **1c** as a white lyophilized powder.

**Comparison of the Regenerated (Top) and Native (Bottom) Peptides: Gradient 5-60% MeCN, 7 min, 2mL/min**

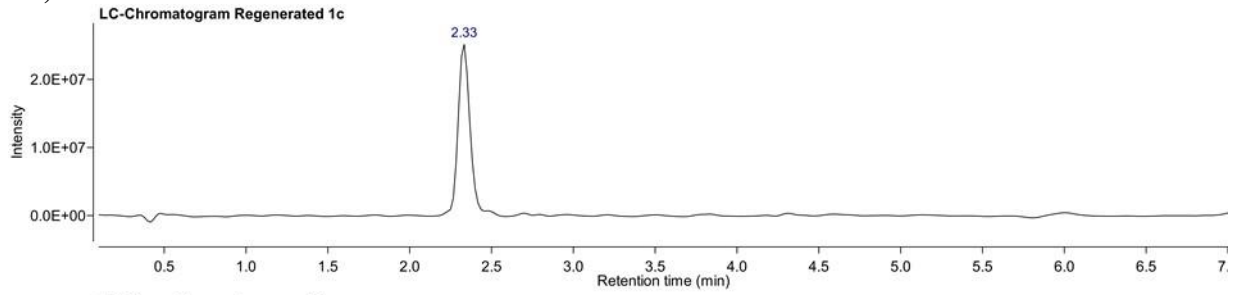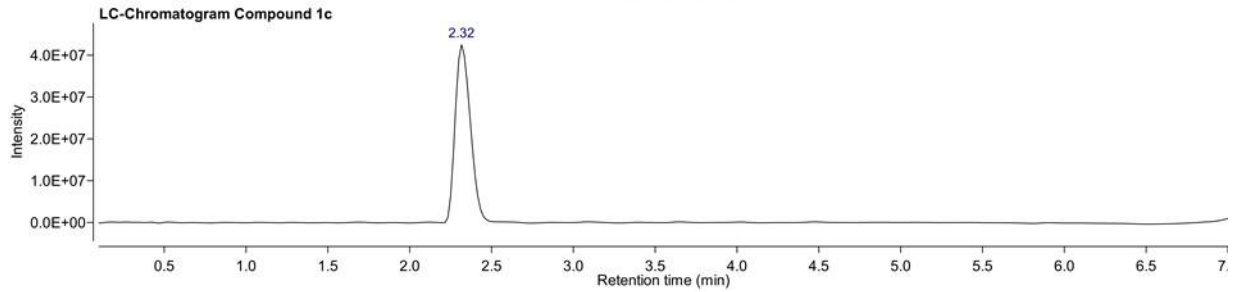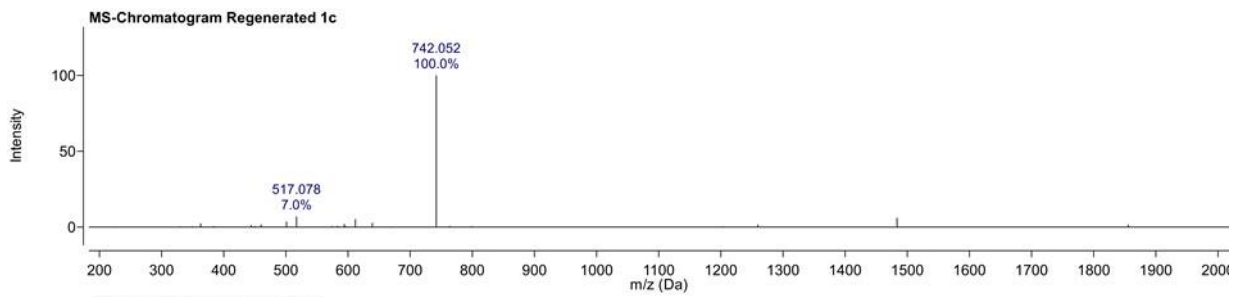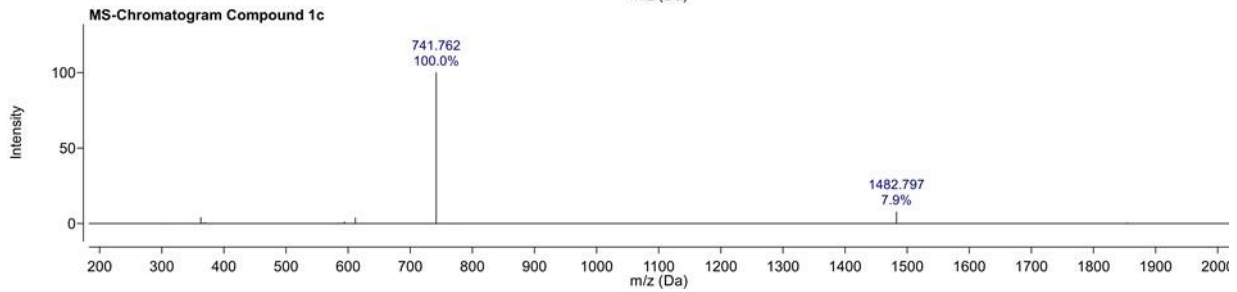



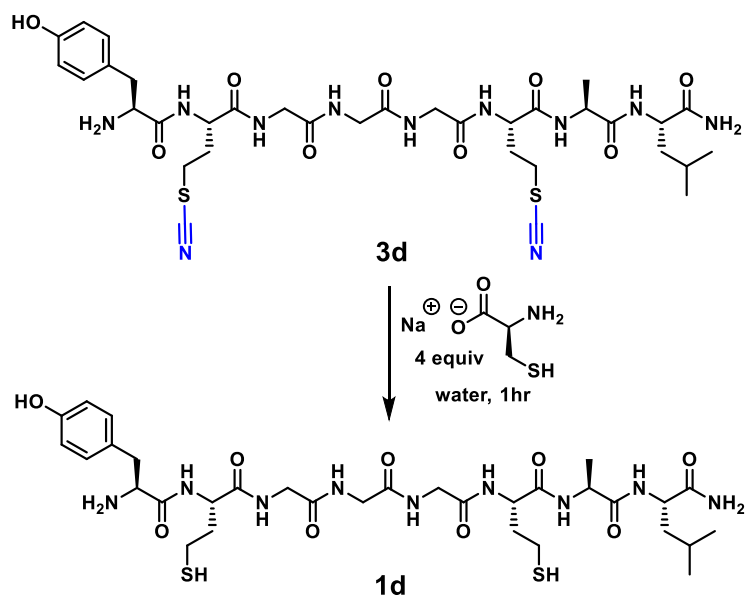

**Regeneration of 1d.** Peptide **3d** (5.0 mg, 6.1  $\mu\text{mol}$ ) was subjected to the general nitrile removal protocol then purified by reverse-phase HPLC (5 - 60% organic over 12 min) to yield 2.7 mg (58%) of peptide **1e** as a white lyophilized powder.

**Comparison of the Regenerated (Top) and Native (Bottom) Peptides: Gradient 5-60% MeCN, 7 min, 2mL/min**

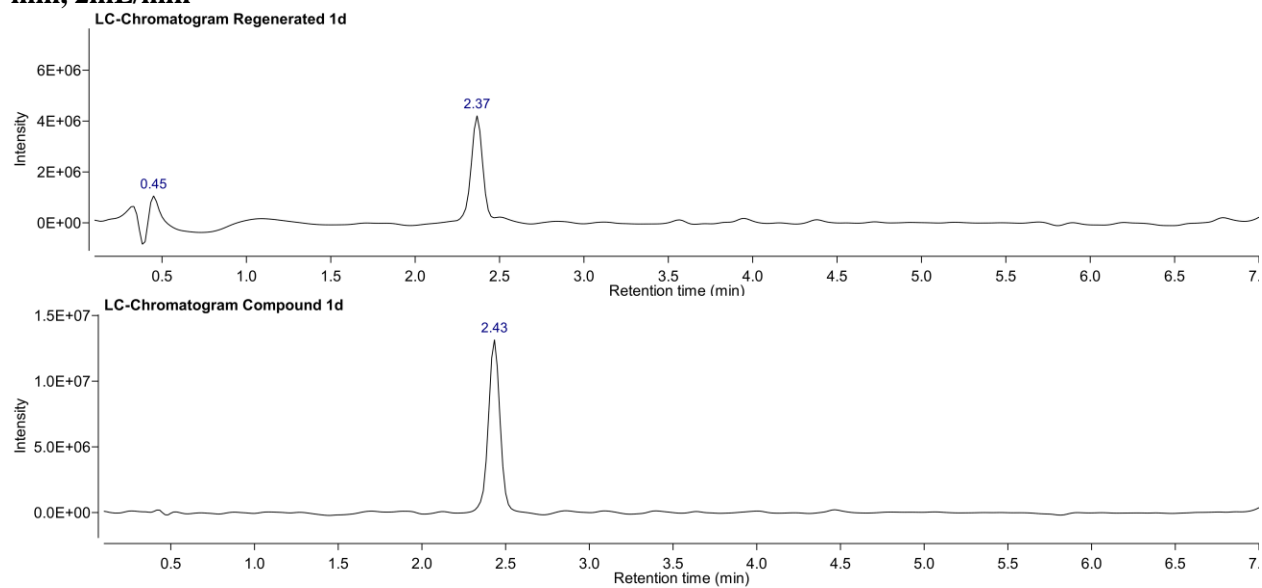

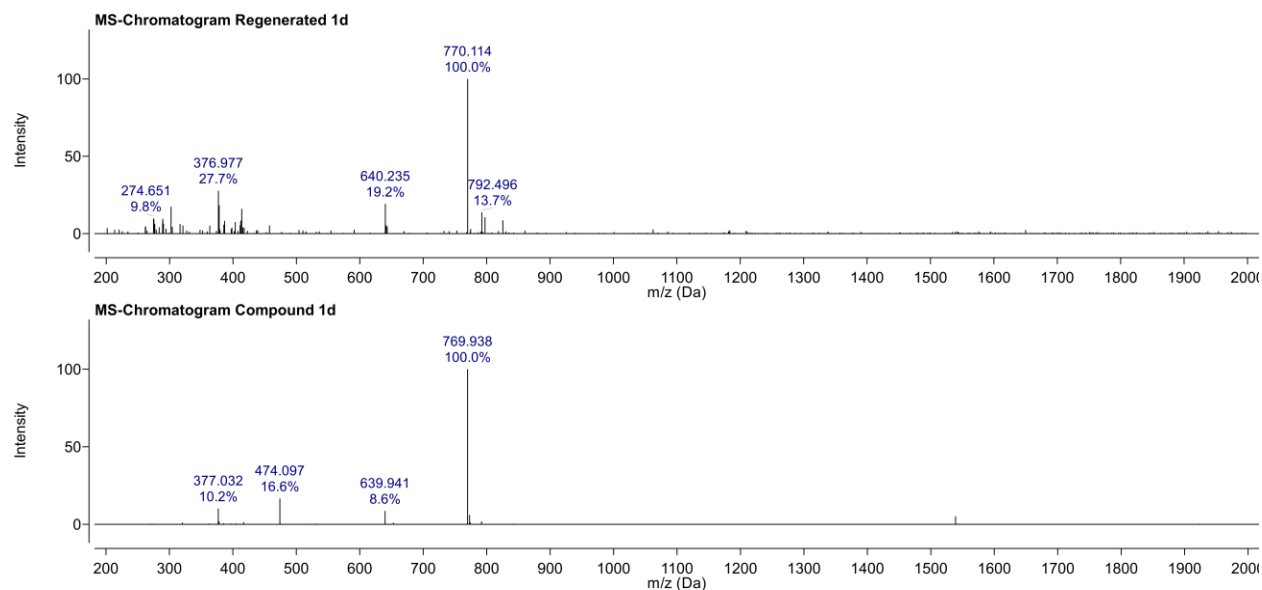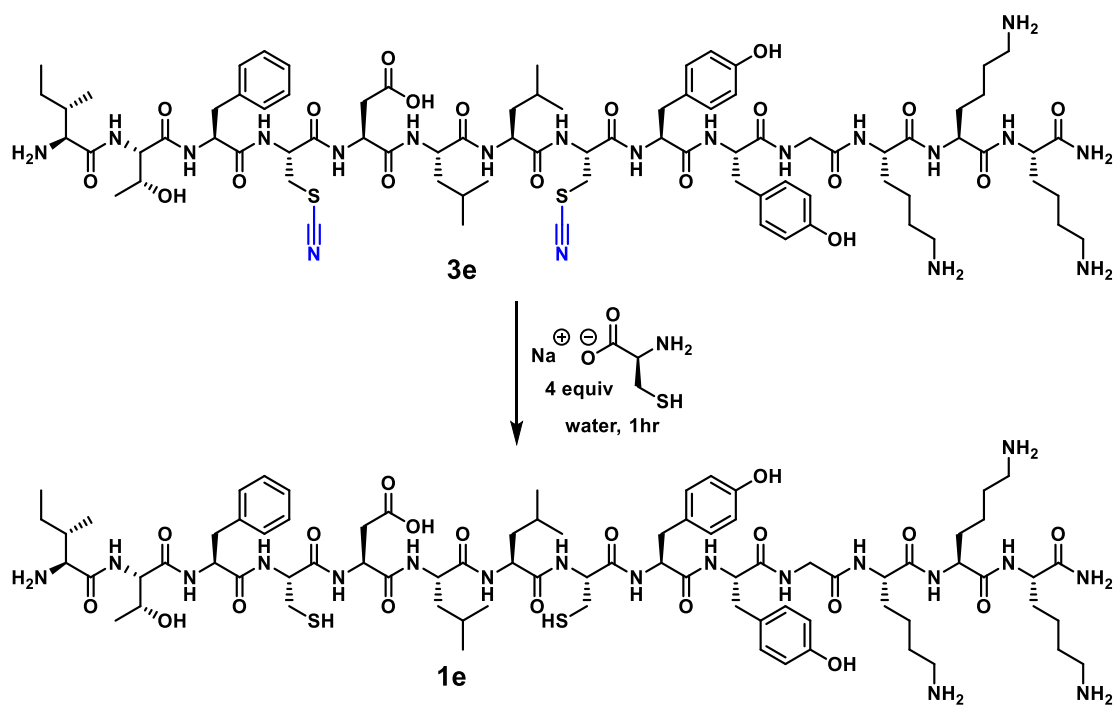

**Regeneration of 1e.** Peptide **3e** (1.7 mg, 1.0  $\mu\text{mol}$ ) was subjected to the general nitrile removal protocol then purified by reverse-phase HPLC [eluent water/MeCN/AcOH (85:10:5) and MeCN (organic) buffered with 0.1% TFA] (5 - 40% organic over 15 min) to yield 0.9 mg (55%) of peptide **1e** as a white lyophilized powder.

**Comparison of the Regenerated (Top) and Native (Bottom) Peptides: Gradient 5-60% MeCN, 10 min, 2mL/min**

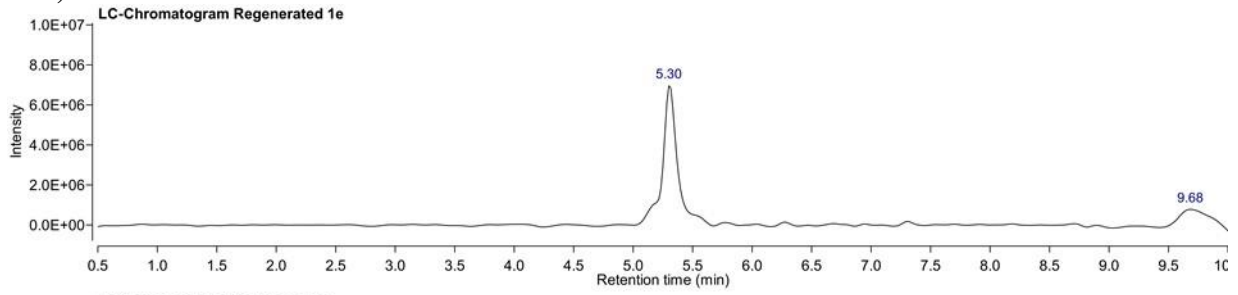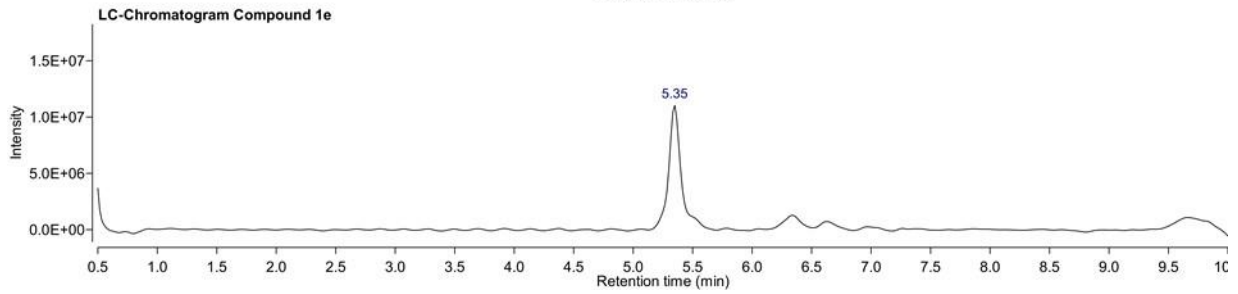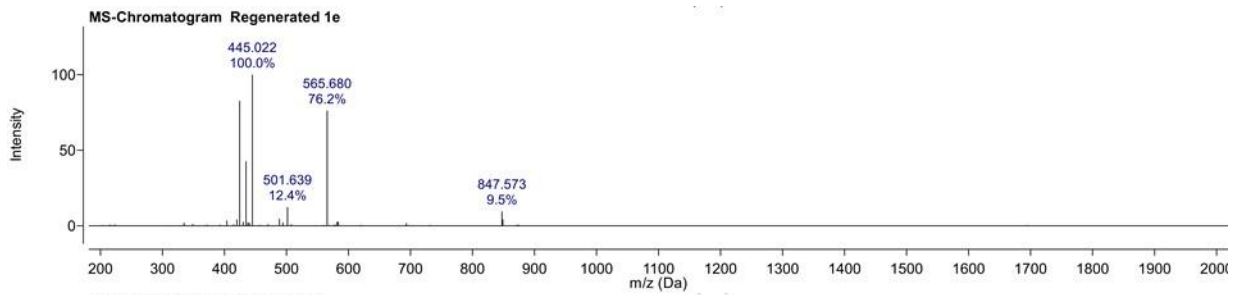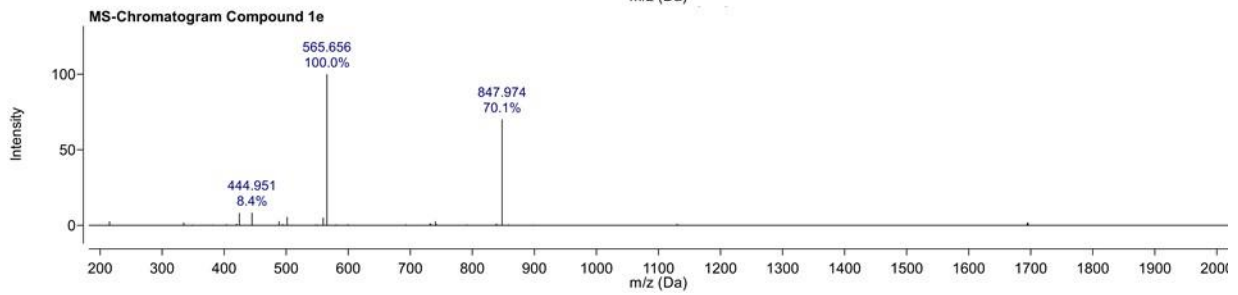

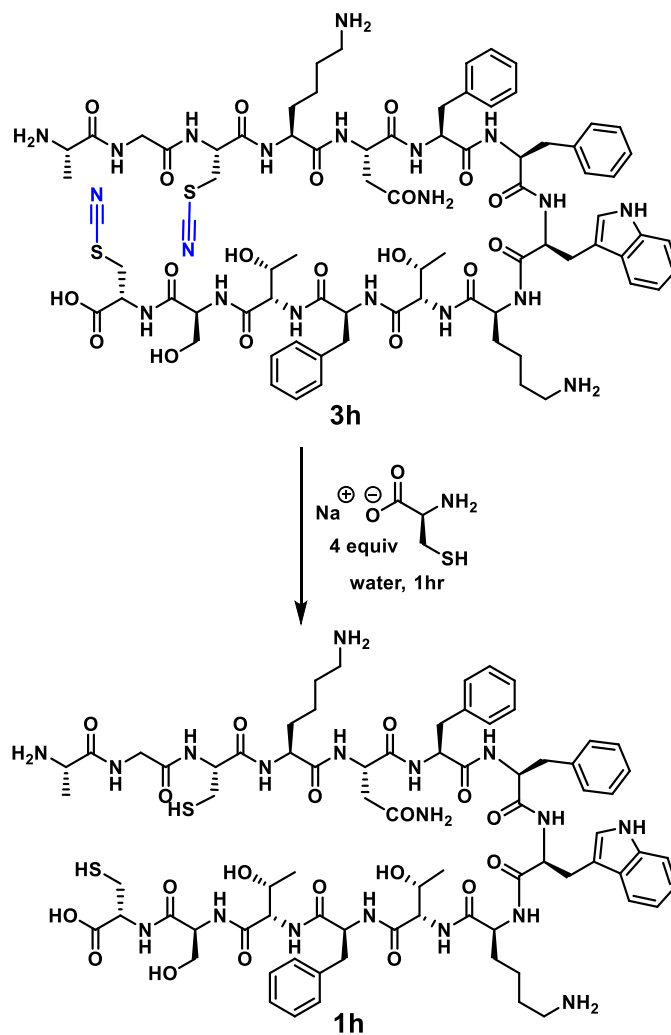

**Regeneration of 1h.** Peptide **3h** (3.2 mg, 1.9  $\mu\text{mol}$ ) was subjected to the general nitrile removal protocol then purified by reverse-phase HPLC (10 - 60% organic over 15 min) to yield 2.1 mg (68%) of peptide **1h** as a white lyophilized powder.

**Comparison of the Regenerated (Top) and Native (Bottom) Peptides: Gradient 5-60% MeCN, 10 min, 2mL/min**

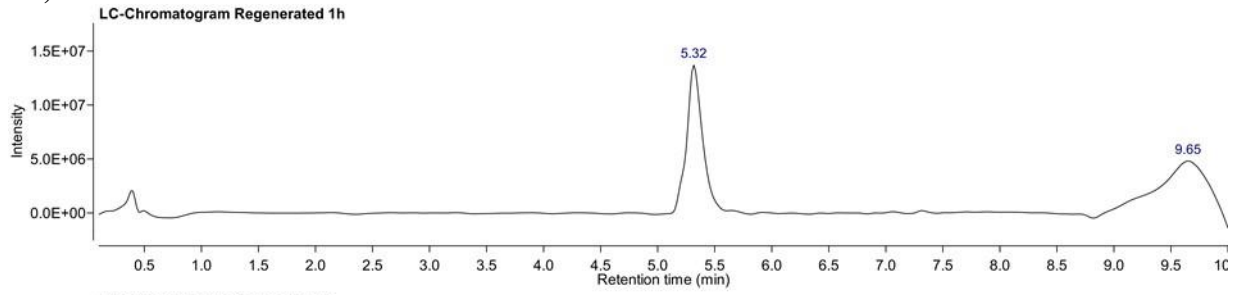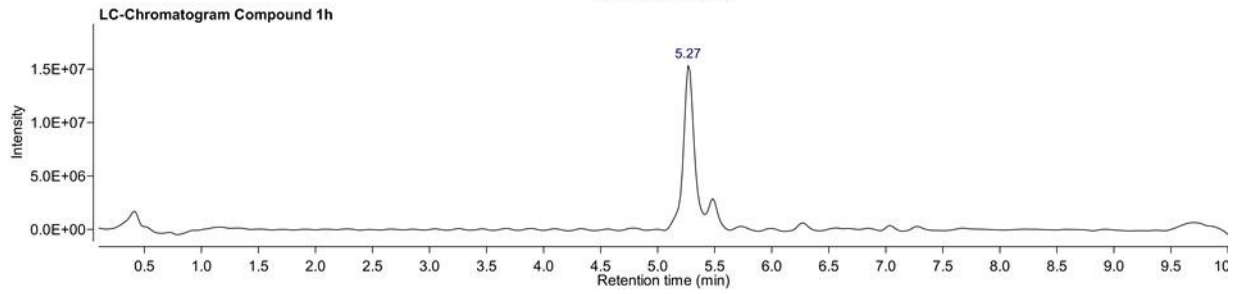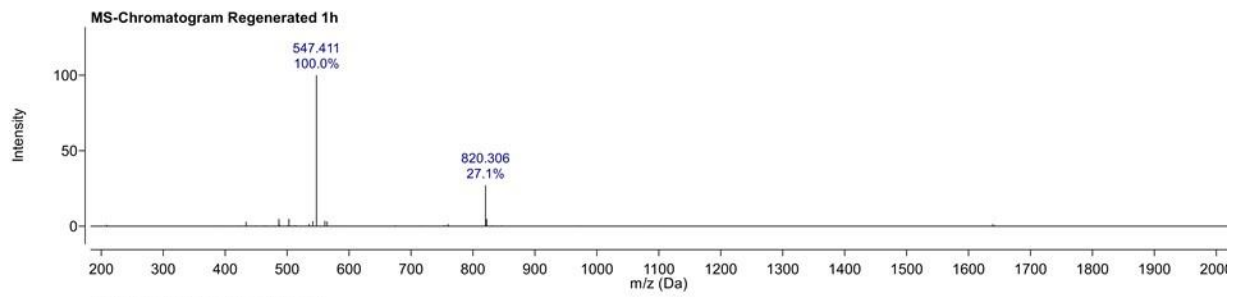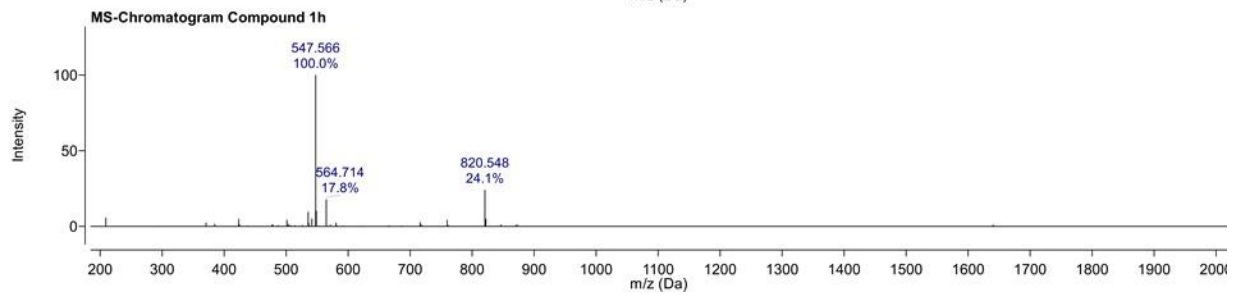

## Synthesis of Fluorescein Tethered Bicyclononyne

The starting materials were prepared from previously reported procedures listed below.

**5-((2-aminoethyl)carbamoyl)-2-(6-hydroxy-3-oxo-3H-xanthen-9-yl)benzoic acid:** Gasparini, G.; Bang, E. K.; Molinard, G.; Tulumello, D. V.; Ward, S.; Kelley, S. O.; Roux, A.; Sakai, N.; Matile, S. *J. Am. Chem. Soc.* **2014**, 136, 6069 – 6074.

**(1R,8S,9r)-Bicyclo[6.1.0]non-4-yn-9-ylmethyl (4-nitrophenyl) carbonate:** Schieber, Christine; Bestetti, Alessandra; Lim, Jet Phey; Ryan, Anneke D.; Nguyen, Tich-Lam; Eldridge, Robert; White, Anthony R.; Gleeson, Paul A.; Donnelly, Paul S.; Williams, Spencer J.; Mulvaney, Paul *Angew. Chem. Int. Ed.* **2012**, 51, 10523 – 10527.

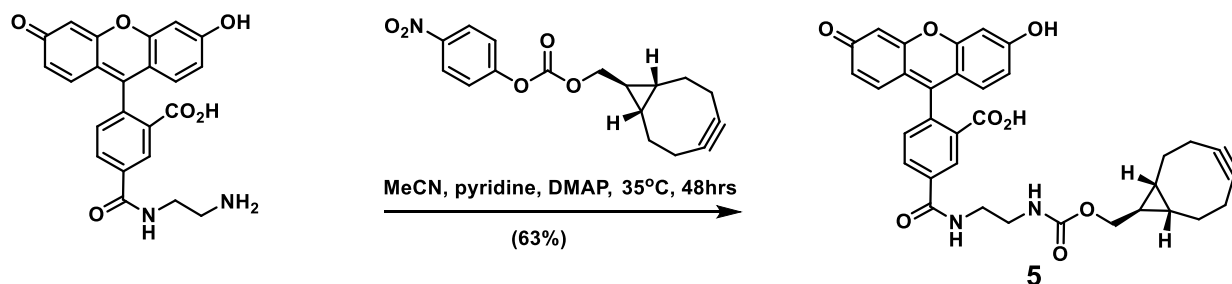

**5-(((2-(((1R,8S,9r)-bicyclo[6.1.0]non-4-yn-9-yl)methoxy)carbonyl)amino)ethyl)carbamoyl)-2-(6-hydroxy-3-oxo-3H-xanthen-9-yl)benzoic acid (5).** To a 5 mL round bottom flask containing 5-((2-aminoethyl)carbamoyl)-2-(6-hydroxy-3-oxo-3H-xanthen-9-yl)benzoic acid (9.0 mg, 22  $\mu\text{mol}$ ) dissolved in MeCN (500  $\mu\text{L}$ ) was added bicyclo[6.1.0]non-4-yn-9-ylmethyl (4-nitrophenyl) carbonate (8.3 mg, 26  $\mu\text{mol}$ , 1.2 equiv) in MeCN (250  $\mu\text{L}$ ) followed by the addition of pyridine (16  $\mu\text{L}$ , 200  $\mu\text{mol}$ , 10 equiv) and DMAP (2.7 mg, 22  $\mu\text{mol}$ , 1 equiv). The contents were then stirred at 35°C for 48 hours. The reaction mixture was evaporated and the crude re-dissolved in water/MeCN (7:3, 1000  $\mu\text{L}$ ) and purified by reverse-phase HPLC (gradient 10-80% organic over 15 minutes) to give 8.2 mg (63%) after lyophilization. HRMS (ES)  $m/z$  595.2069 [(M+H)<sup>+</sup>; calcd for C<sub>34</sub>H<sub>31</sub>N<sub>2</sub>O<sub>8</sub>: 595.2080]. <sup>1</sup>H NMR (500 MHz, Methanol-*d*<sub>4</sub>)  $\delta$  8.49 (s, 1H), 8.21 (d,  $J$  = 8.0 Hz, 1H), 7.34 (d,  $J$  = 8.0 Hz, 1H), 6.79 (s, 2H), 6.73 (d,  $J$  = 8.3 Hz, 2H), 6.64 (d,  $J$  = 8.8 Hz, 2H), 4.15 (d,  $J$  = 8.2 Hz, 2H), 3.54 (t,  $J$  = 5.7 Hz, 2H), 3.39 (t,  $J$  = 6.0 Hz, 2H), 2.19 (d,  $J$  = 12.8 Hz, 4H), 2.09 (d,  $J$  = 15.3 Hz, 2H), 1.56 (dd,  $J$  = 21.8, 9.7 Hz, 2H), 1.36 (dt,  $J$  = 17.3, 8.6 Hz, 1H), 0.87 (t,  $J$  = 10.0 Hz, 2H).

# Gradient 10-90% MeCN, 10 min, 2mL/min

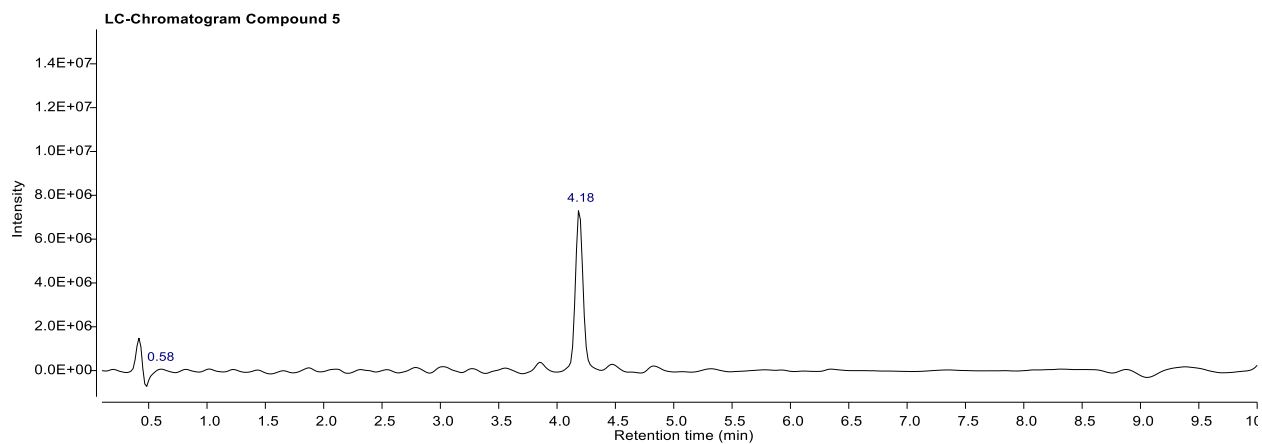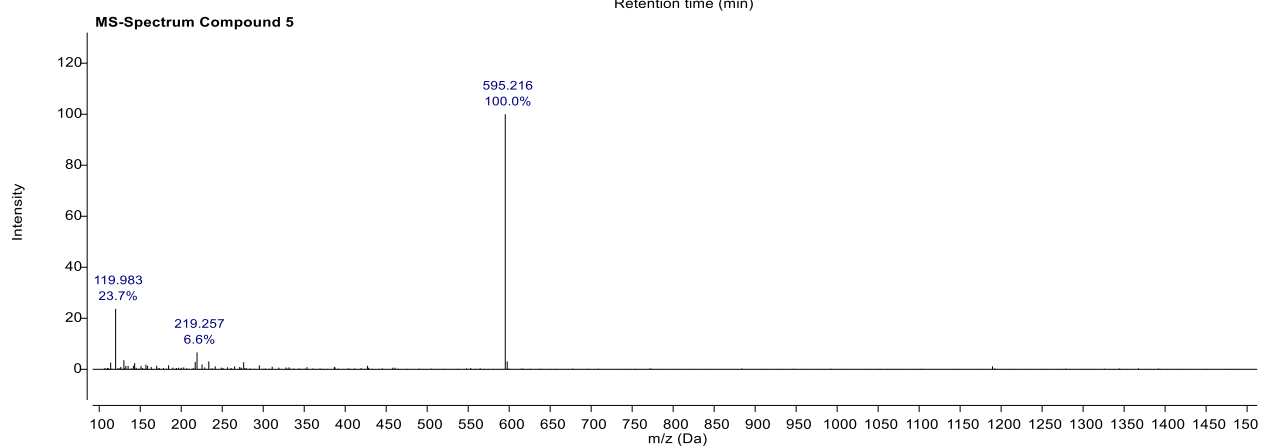

## Inverse-Electron Demand Diels-Alder of S,S-Tetrazine Somatostatin

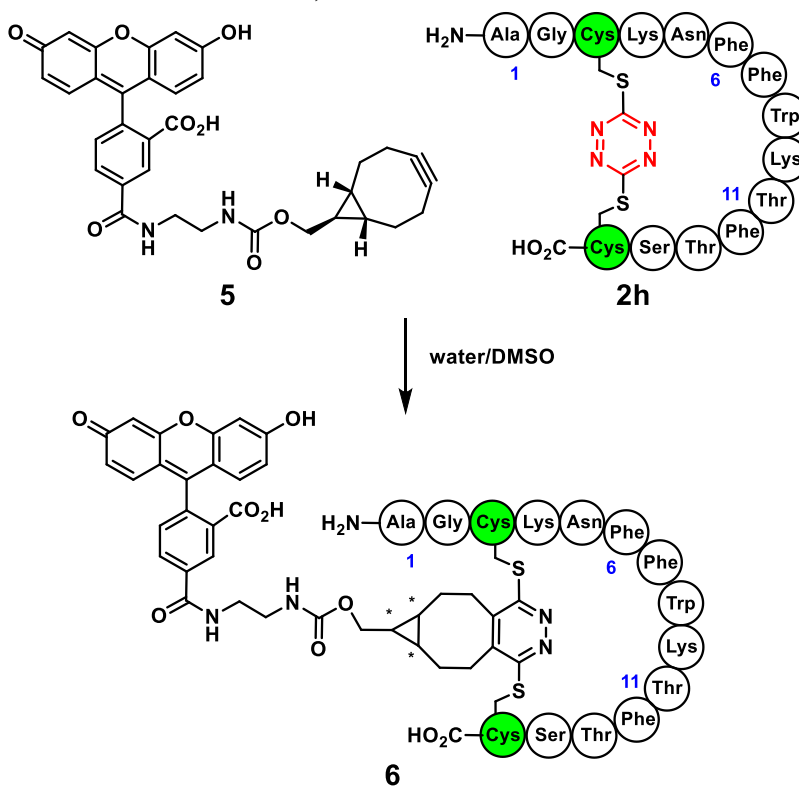

**Peptide 6.** To a 5 mL round bottom flask was added a solution (1.1 mM) of peptide **2h** dissolved in water (500  $\mu$ L) followed by a solution (1.2 mM) of bicyclononyne **5** in DMSO (500  $\mu$ L). The contents were stirred at room temperature for 4 days and the solvent removed *in vacuo*. The residue was purified by reverse-phase HPLC (gradient 10-60% organic over 15 min) to give (0.9 mg, 68%) of a yellow-orange powder after lyophilization. MALDI-TOF  $m/z$  2283.468 [(M+H)<sup>+</sup>; calcd for C<sub>112</sub>H<sub>135</sub>N<sub>22</sub>O<sub>27</sub>S<sub>2</sub>: 2283.930].



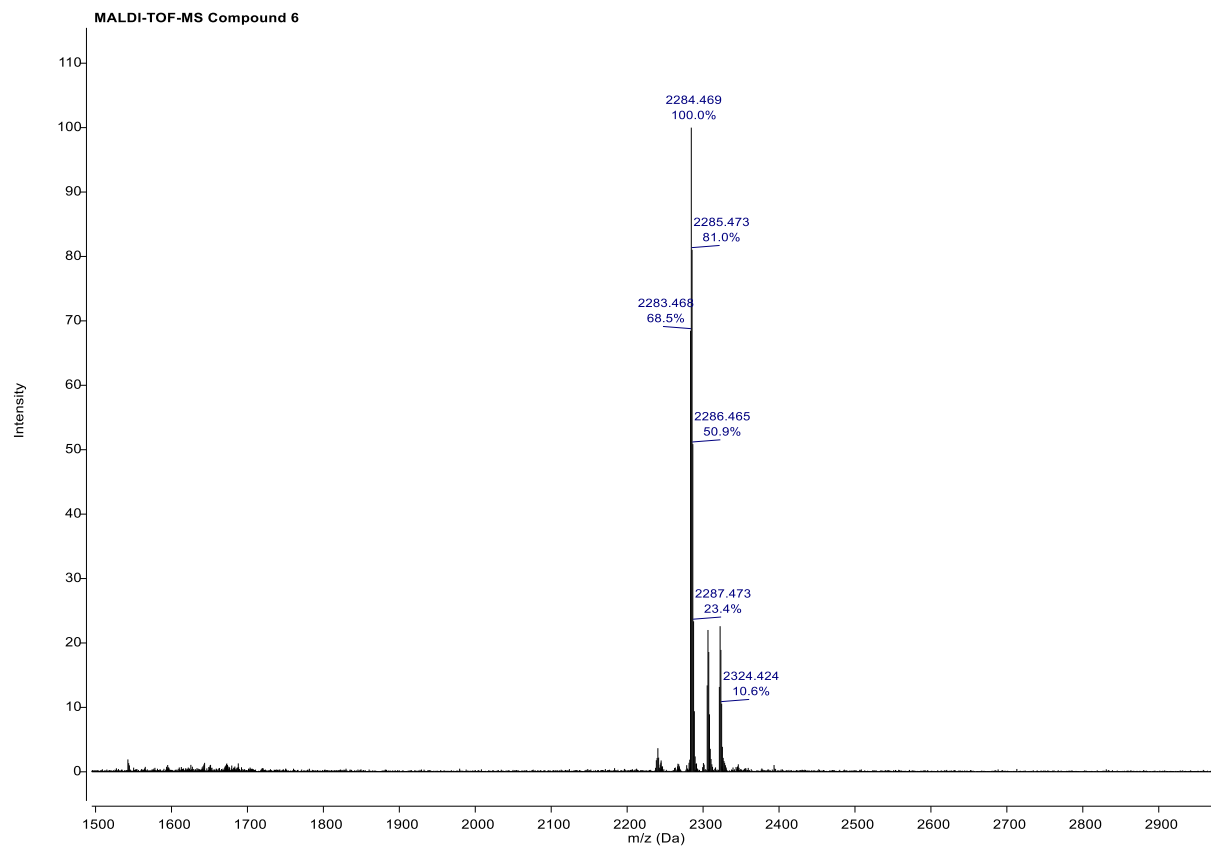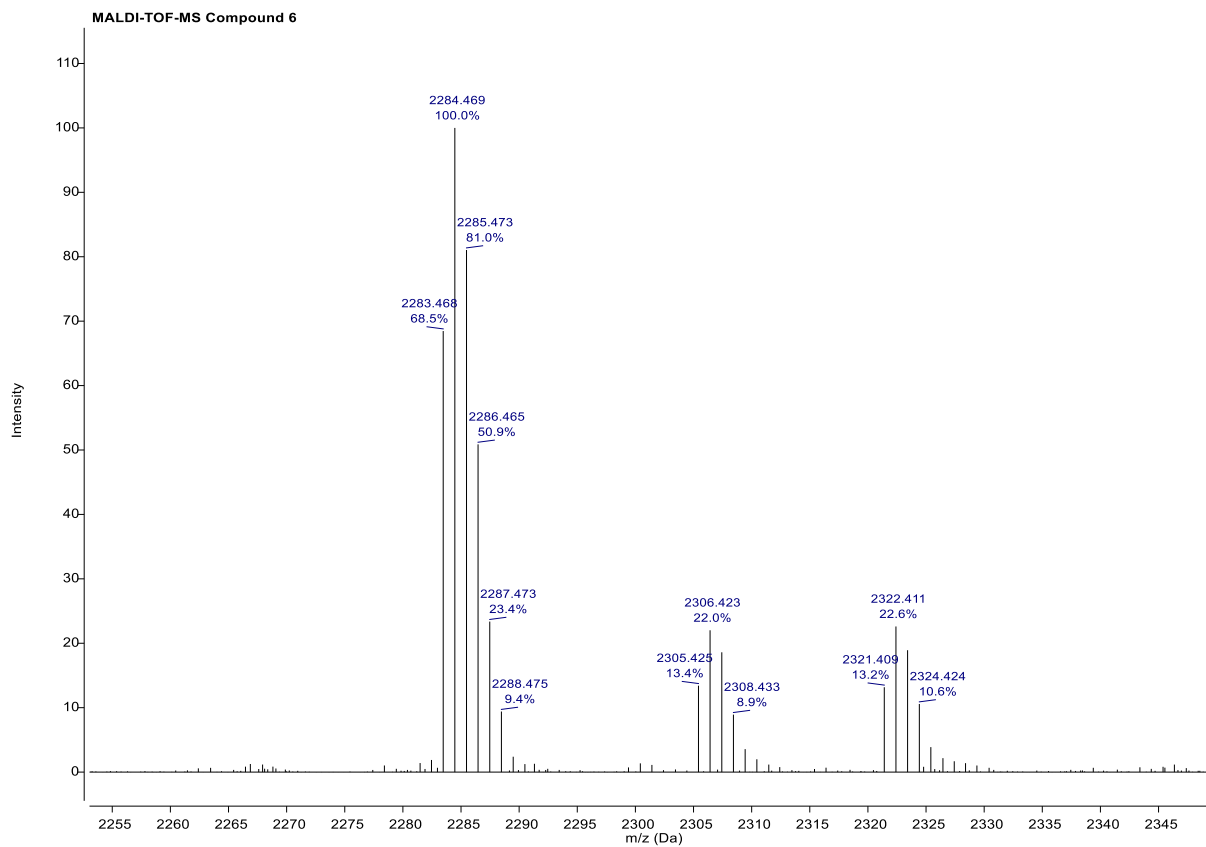

**Gradient 5-60% MeCN, 10 min, 2mL/min**

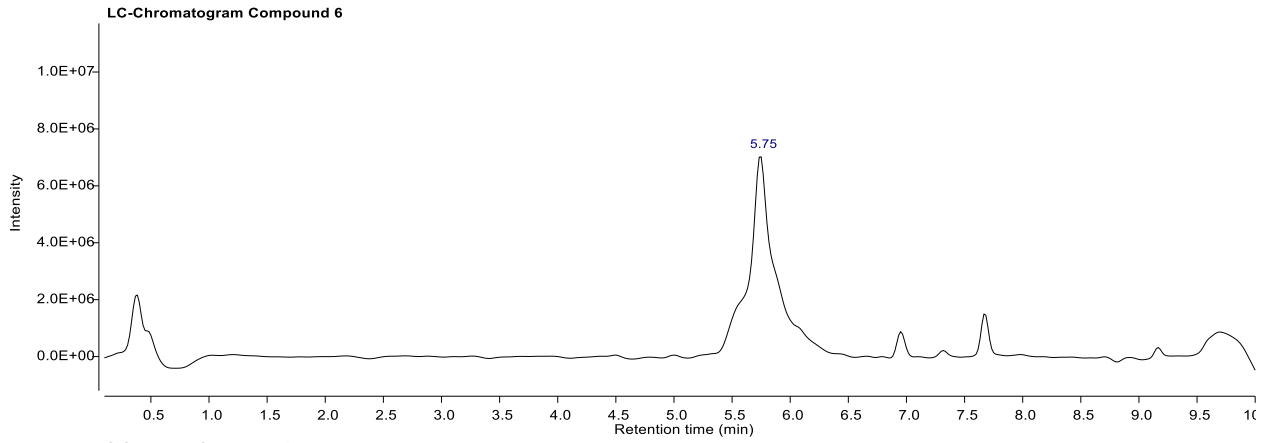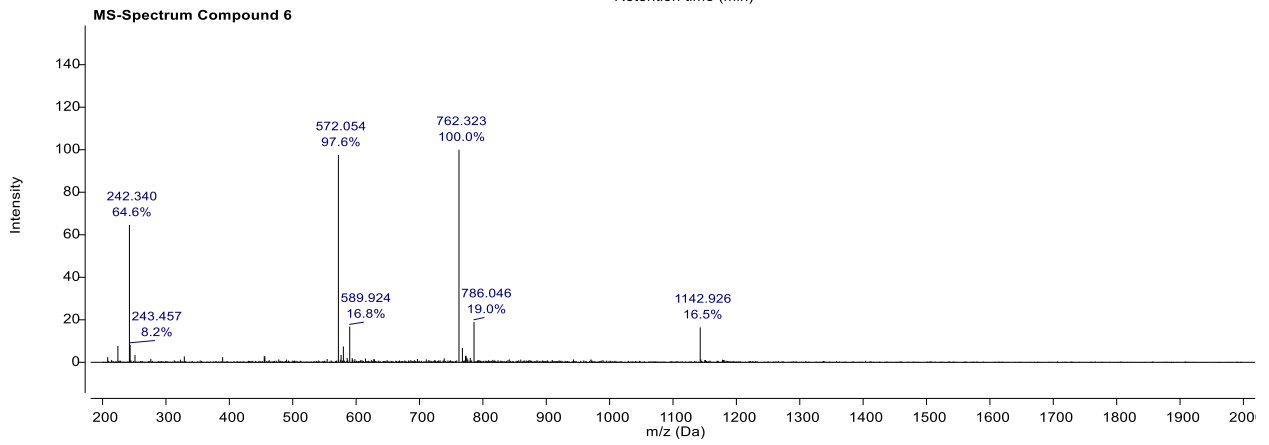

## Tetrazine Stapling of the Thioredoxin Protein

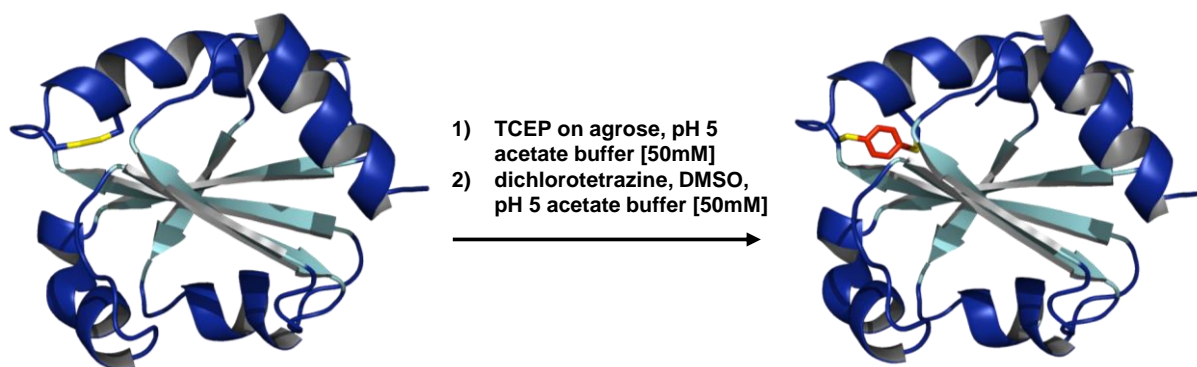

To a 1.7 mL mini-centrifuge tube containing thioredoxin (0.25 mg, 21 nmol) dissolved in acetate buffer pH 5 (200 mM, 100  $\mu$ L), was added TCEP immobilized on agrose (300  $\mu$ L, 8  $\mu$ mol/mL, 2.4  $\mu$ mol, 112 equiv); the final buffer concentration was 50 mM. The reaction was stirred at room temperature for 2.0 hours under an argon atmosphere. The contents were kept under a blanket of argon, then filtered through a plastic pipet tip with a cotton plug and rinsed with degassed 50 mM acetate buffer pH 5 (3  $\times$  200  $\mu$ L). To the pooled filtrates (1.0 mL) in a 1.7 mL mini-centrifuge tube was added a pre-mixed solution of dichlorotetrazine in DMSO (20  $\mu$ L, 87 nmol, 4 equiv, [0.67 mg/mL]) and stirred for 1 minute. The solution was then transferred to a pre-equilibrated disposable PD-10 desalting column and eluted with 50 mM Tris, pH 7.8, 150 mM NaCl. The fractions containing protein were pooled and stored at 4°C. Bradford assay (88% yield). MALDI-TOF  $m/z$  11757.782 [(M+H)<sup>+</sup>; 11756.45; calculated for Trx-1 (11675.43 Da) + tetrazine (80.01 Da) + H<sup>+</sup> (1.01)].

### MALDI Spectrum of Tetrazine Thioredoxin (calculated $(M+H)^+ = 11756.45$ )

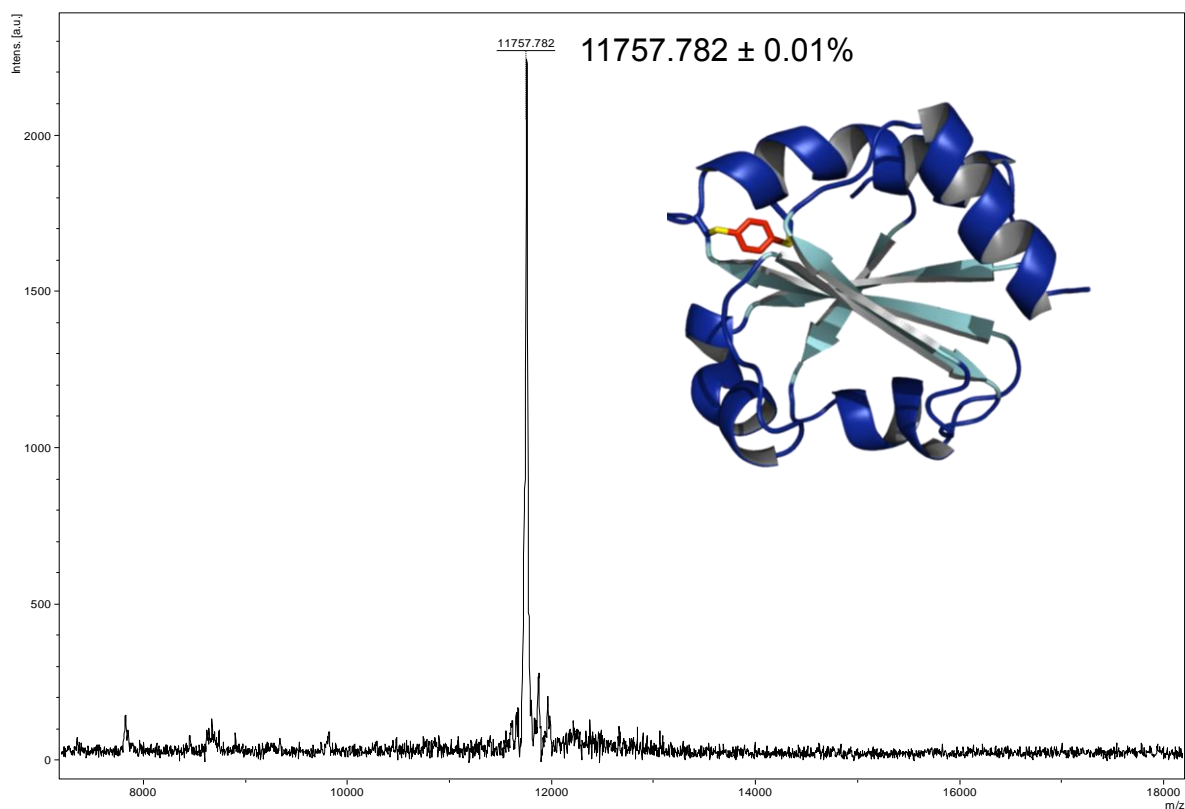

### MALDI Spectrum of Tetrazine Thioredoxin (same sample as above using lower ionization energy, shows some starting material)

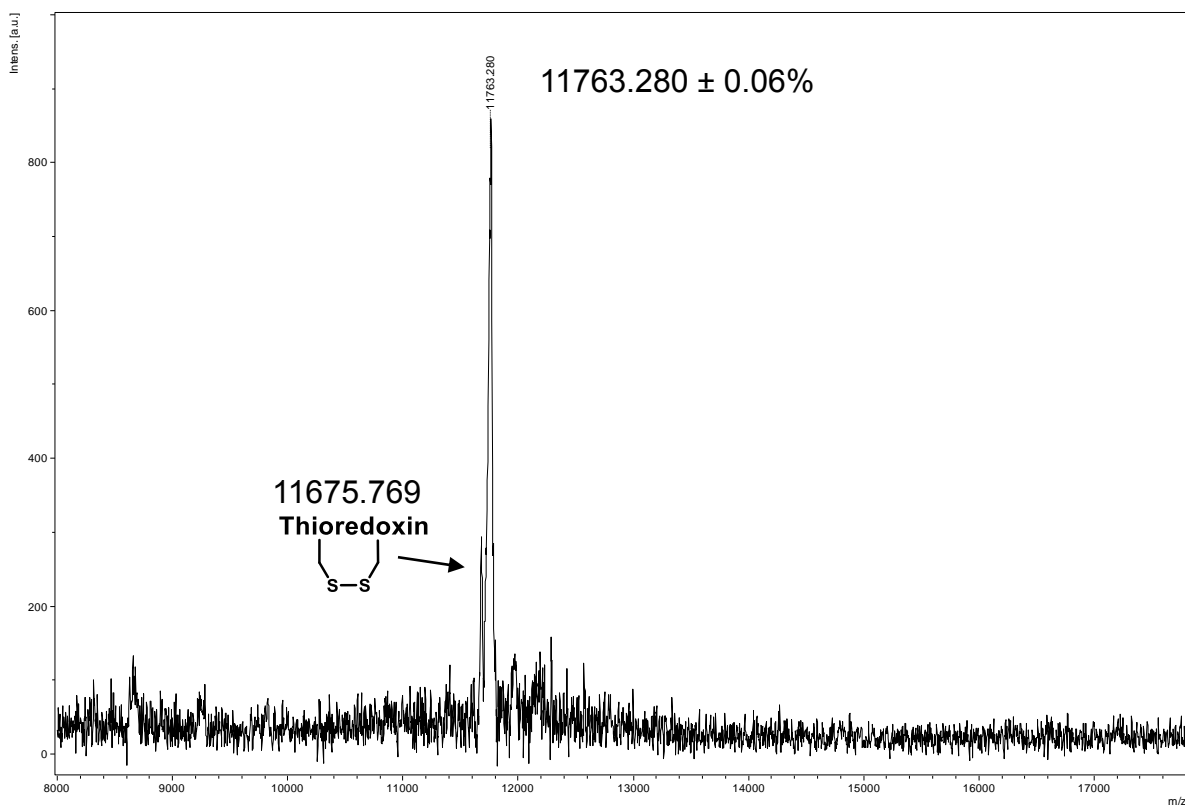

## Photochemical Unstapling and Regeneration of the Thioredoxin Protein

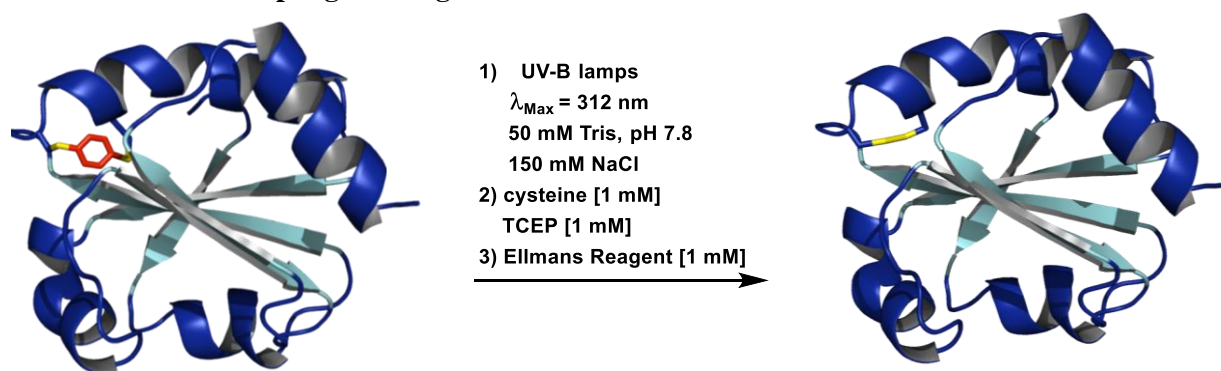

### Sample Preparation for Comparison

A sample of tetrazine thioredoxin (0.1 mg, 8 nmol), from the desalting column in 50 mM Tris, pH 7.8, 150 mM NaCl (1000  $\mu\text{L}$ ) was divided between two 1.7 mL mini-centrifuge tubes. One sample underwent photolysis and the other used as a comparison.

### Tetrazine Thioredoxin Photolysis

A 1.7 mL mini-centrifuge tube containing tetrazine thioredoxin (0.05 mg, 4 nmol) dissolved in 50 mM Tris, pH 7.8, 150 mM NaCl (500  $\mu\text{L}$ ) was suspended in a Rayonet<sup>®</sup> photoreactor equipped with three UV-B lamps. The contents were irradiated for 1.0 hour, MALDI indicated consumption of the starting material with partial loss of the nitrile groups.

### Regeneration of the Protein

To the photolyzed sample dissolved in 50 mM Tris, pH 7.8, 150 mM NaCl (500  $\mu\text{L}$ ), was added cysteine (25  $\mu\text{L}$ ) of a 20 mM solution in the Tris buffer system and TCEP (25  $\mu\text{L}$ ) of a 20 mM solution in the Tris buffer system. The contents were allowed to stand for 4.0 hours and then diluted to 3 mL with the Tris buffer system and transferred for centrifugation in an Amicon centrifugal filter (MWCO 3000, 35° fixed angle rotor @ 7000 $\times$ G, 30 minutes, 4°C), the concentrated sample (150  $\mu\text{L}$ ) was diluted to 3 mL and repeated. The retentate was collected and diluted to 500  $\mu\text{L}$  with the Tris buffer system, then Ellman's reagent [5,5'-dithio-bis-(2-nitrobenzoic acid)] (25  $\mu\text{L}$  of a 20 mM solution in the Tris buffer system) was added and allowed to stand for 6.0 hours. The contents were then diluted to 3 mL with the Tris buffer system and transferred for centrifugation in an Amicon centrifugal filter (MWCO 3000, 35° fixed angle rotor @ 7000 $\times$ G, 30 minutes, 4°C). The retentate was collected and diluted to 500  $\mu\text{L}$  with the Tris buffer solution and analyzed by MALDI-TOF and FPLC. Bradford assay (73% yield). MALDI-TOF  $m/z$  11676.188 [(M+H)<sup>+</sup>; 11676.44].

# MALDI Chromatogram of Tetrazine-Thioredoxin After Photolysis (mixture of products)

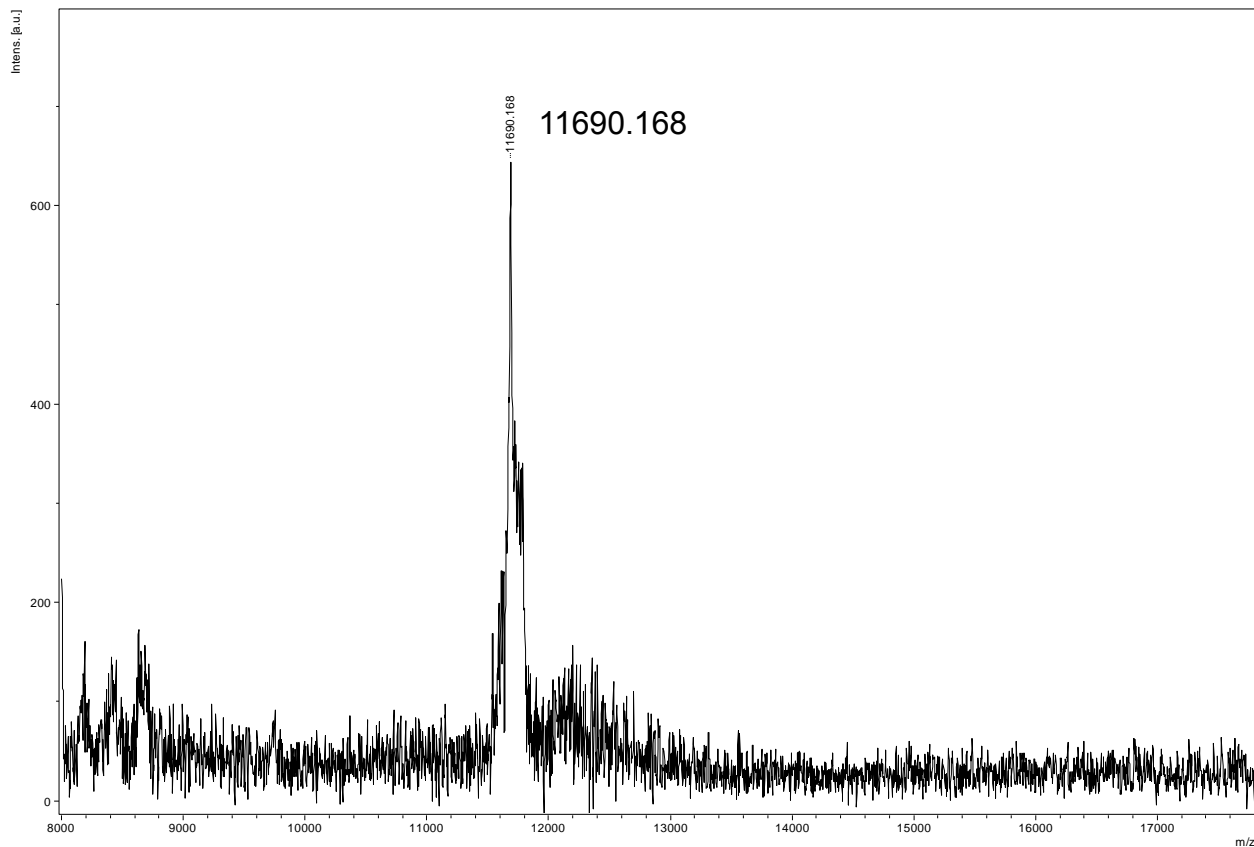

## Zoom region 11000 – 12500: Tetrazine-Thioredoxin after Photolysis (mixture of products)

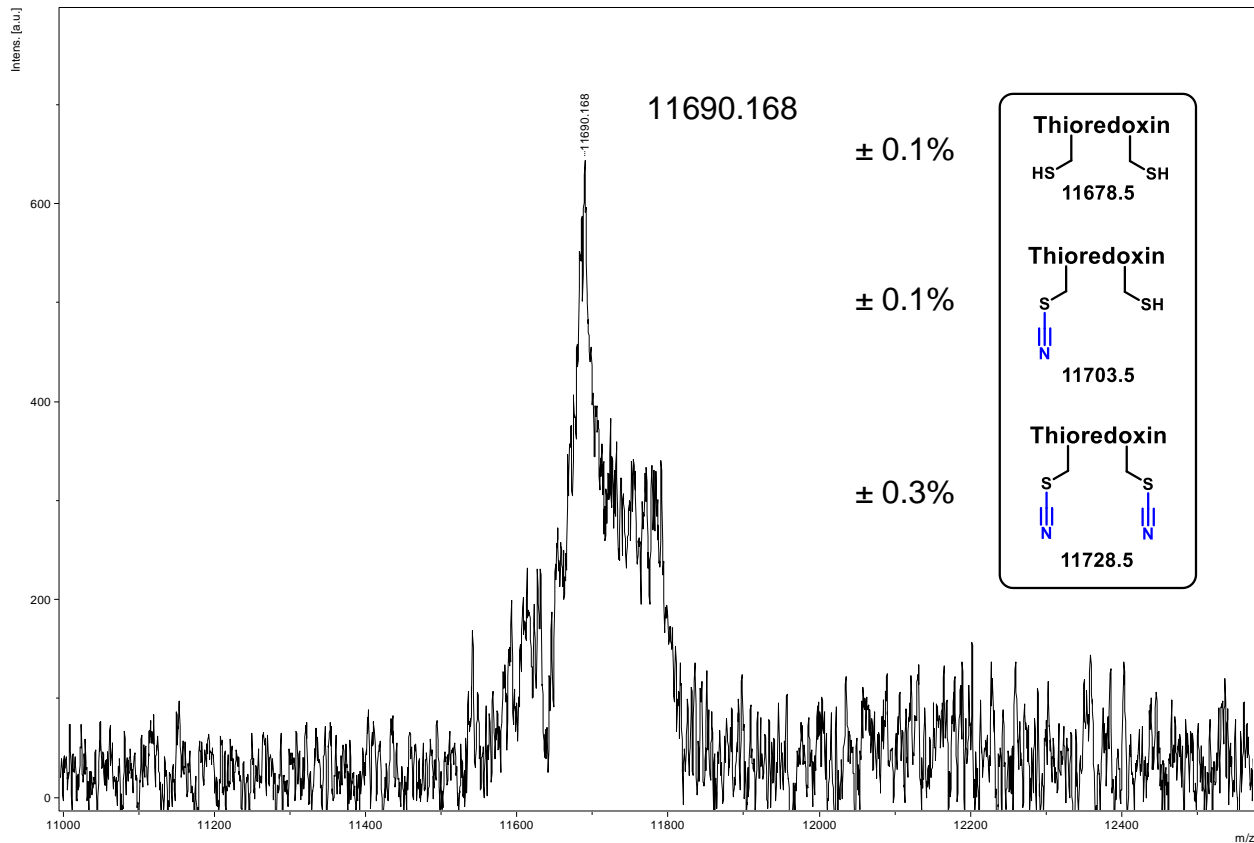

### MALDI Chromatogram of Regenerated Thioredoxin (calculated $(M+H)^+$ = 11676.44)

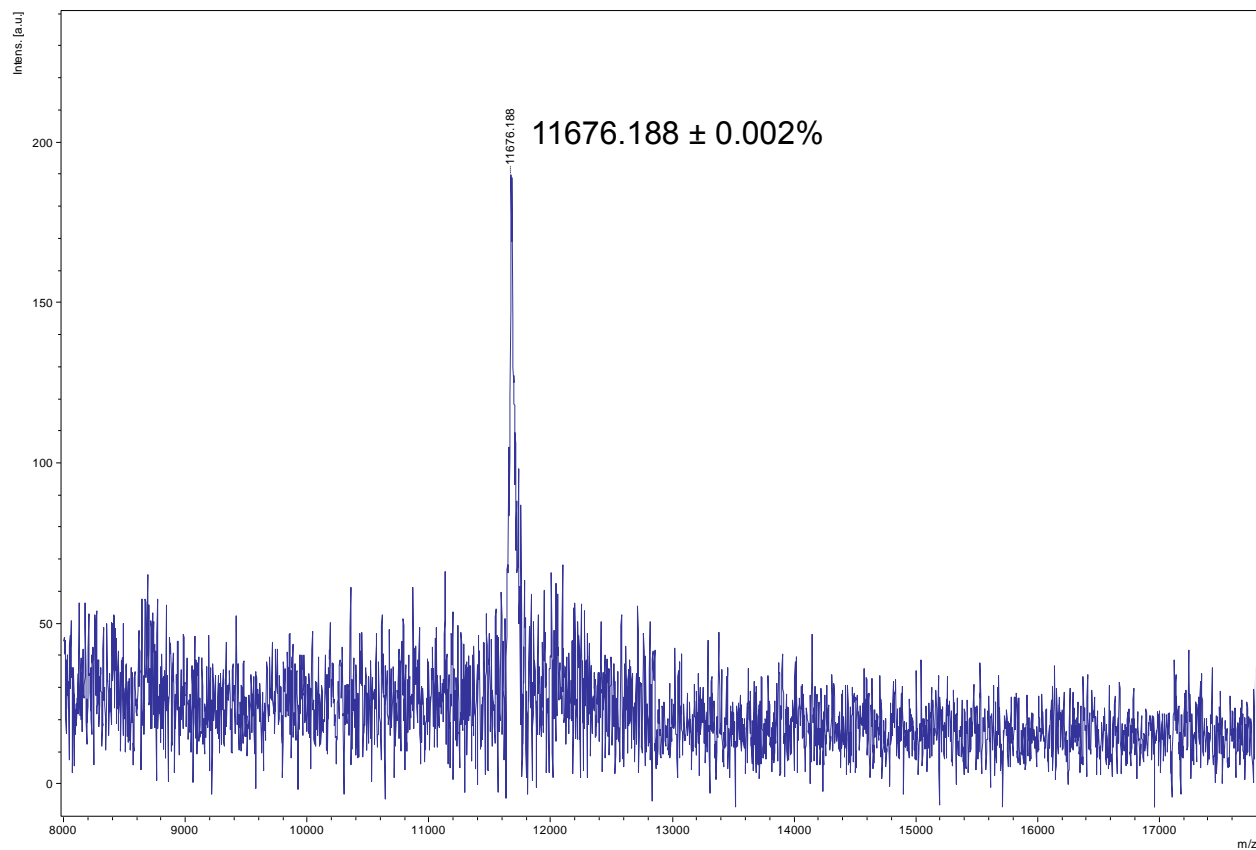

### MALDI Comparison of Regenerated with Authentic Thioredoxin

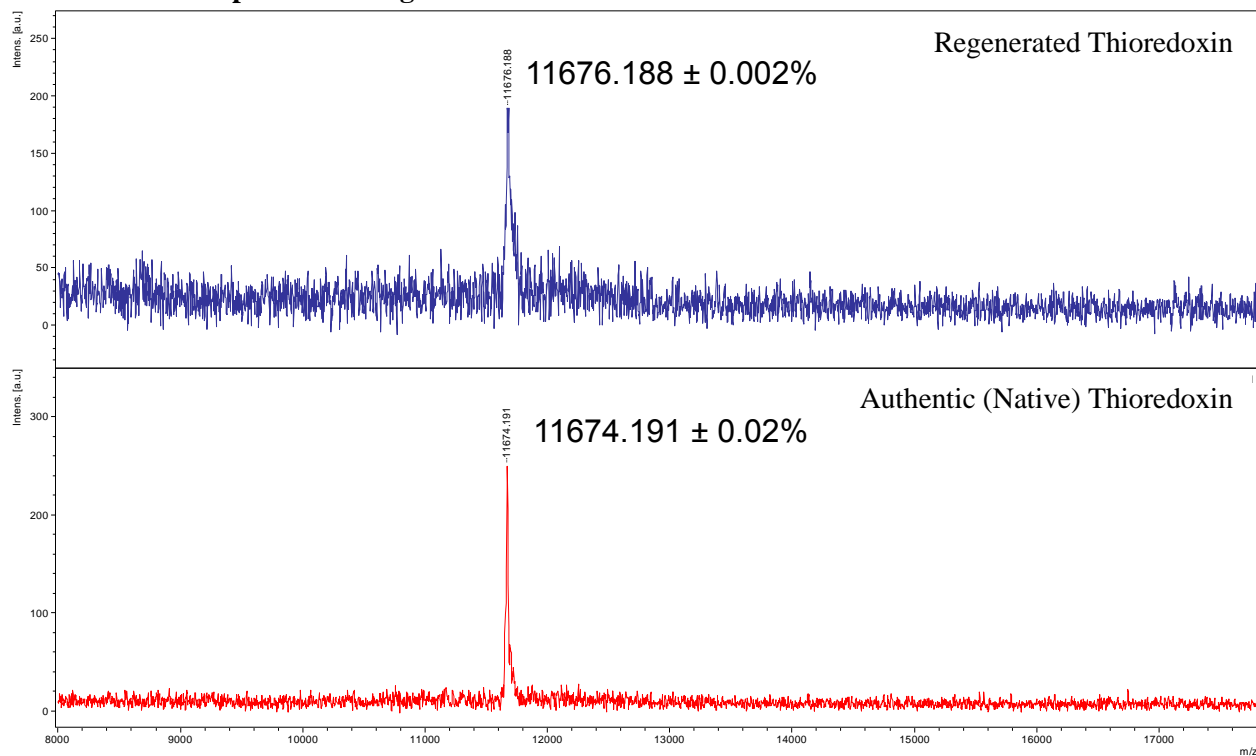

## General Methods for FPLC

Fast protein liquid chromatography (FPLC) was conducted with an AKTA FPLC equipped with a P 920 pump and UPC-900 control box. Proteins were separated with a Superdex 75/10/300 column at 4°C and eluted with 50 mM Tris, pH 7.8, 150 mM NaCl (isocratic) at 0.5 mL/min.

**A calibration curve of Superdex 75/10/300 column was prepared for molecular weight estimation.**

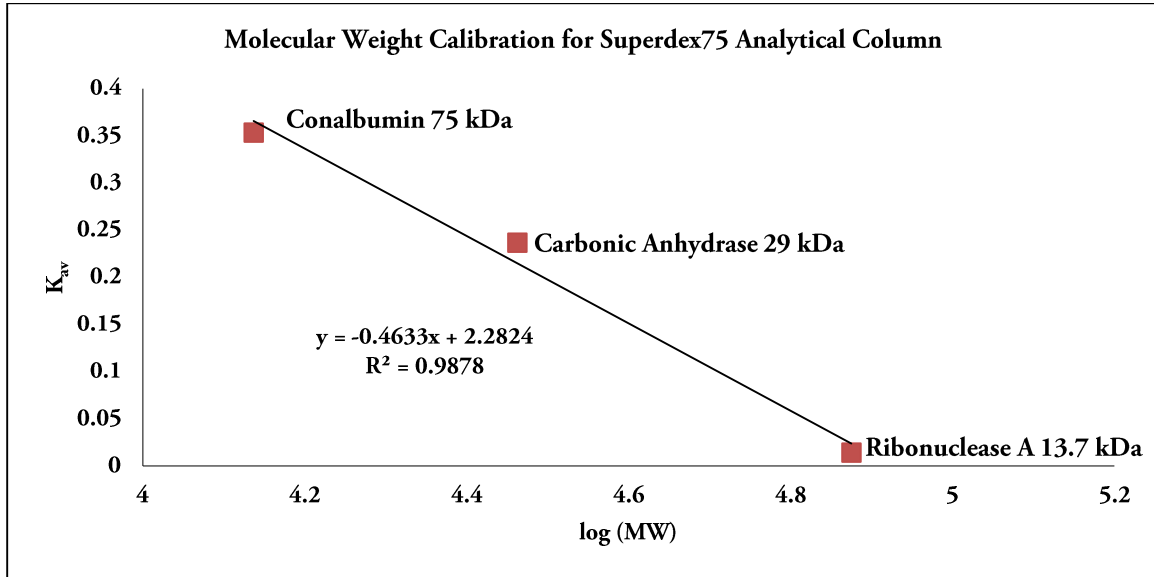



### FPLC Chromatogram of Tetrazine Thioredoxin

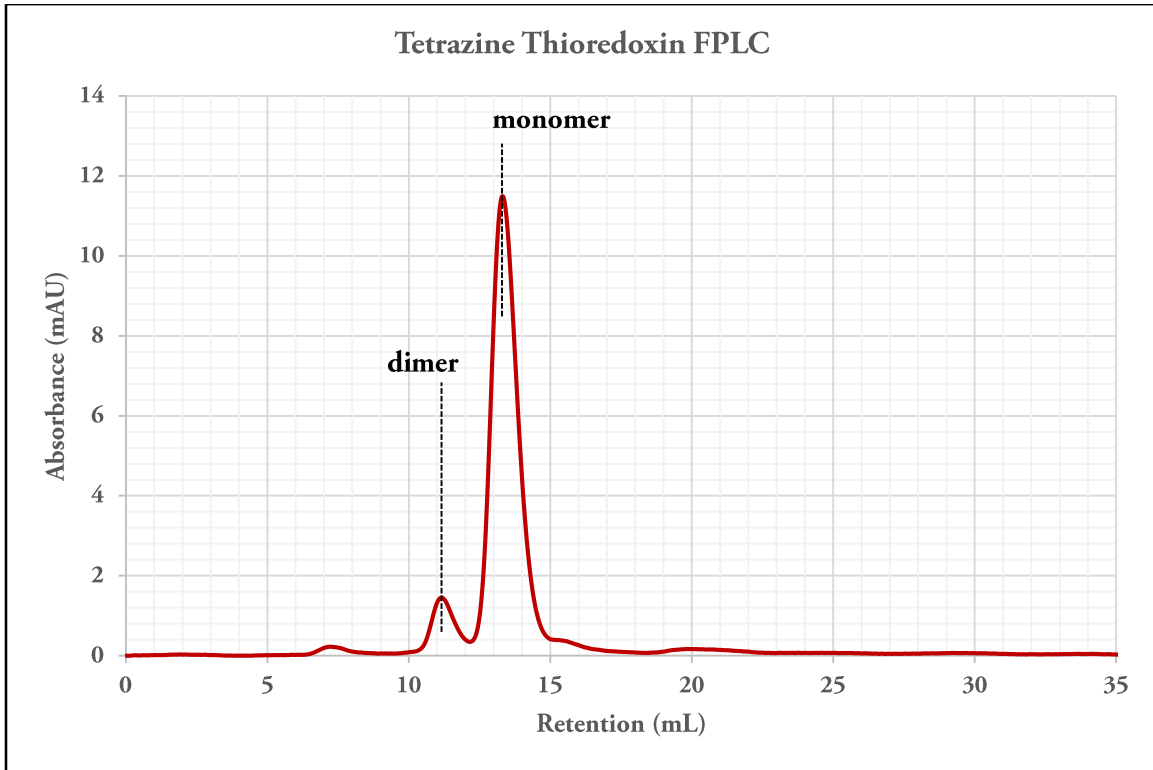

### FPLC Chromatogram of Regenerated Thioredoxin

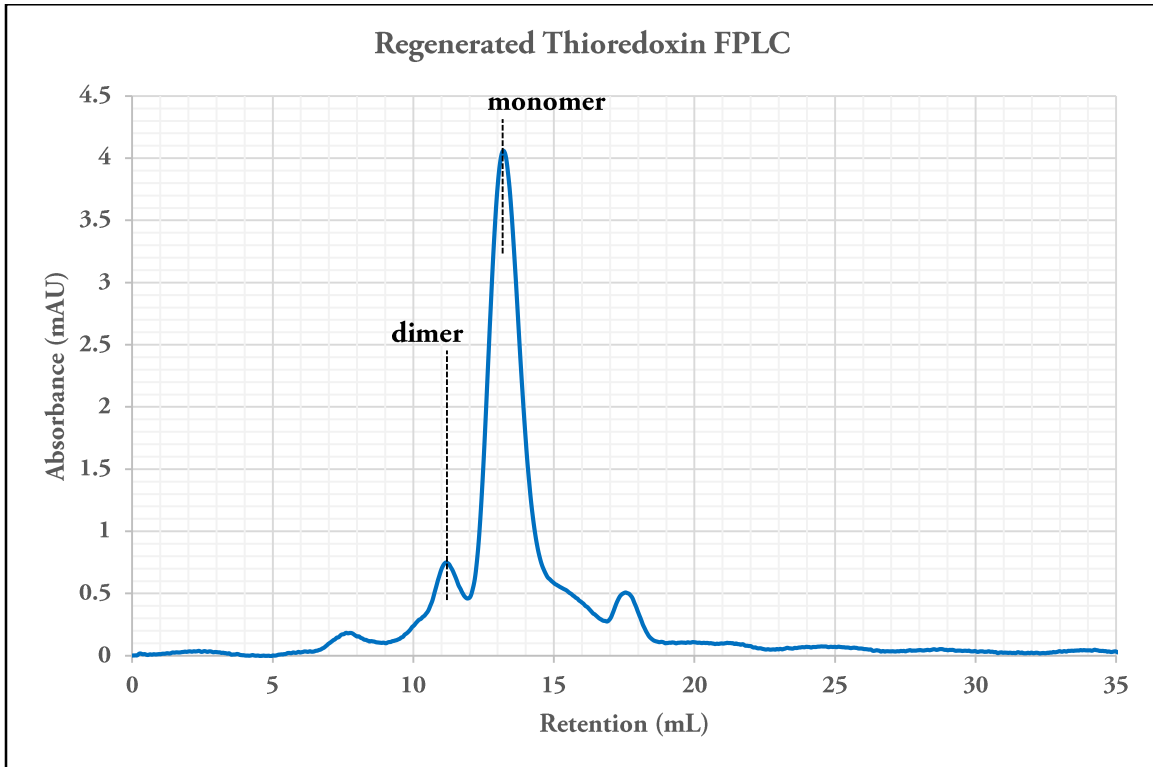

Approximated extinction coefficient ( $\epsilon$ ) values were calculated for thioredoxin (Trx) and tetrazine-thioredoxin (tet-Trx). The Trx protein contains 2 Trp and 2 Tyr residues, the  $\epsilon$  values used in the calculations are listed below.

| Residue       | Extinction Coefficient ( $\epsilon$ ) Used |
|---------------|--------------------------------------------|
| Tyrosine      | 1280 $\text{cm}^{-1}\text{M}^{-1}$         |
| Tryptophan    | 5690 $\text{cm}^{-1}\text{M}^{-1}$         |
| S,S-tetrazine | 11369 $\text{cm}^{-1}\text{M}^{-1}$        |

$$\epsilon_{Trx} = (2 \times 5690 \text{cm}^{-1}\text{M}^{-1}) + (2 \times 1280 \text{cm}^{-1}\text{M}^{-1}) = 13940 \text{cm}^{-1}\text{M}^{-1}$$

$$\epsilon_{tet-Trx} = (2 \times 5690 \text{cm}^{-1}\text{M}^{-1}) + (2 \times 1280 \text{cm}^{-1}\text{M}^{-1}) + (11369 \text{cm}^{-1}\text{M}^{-1}) = 25309 \text{cm}^{-1}\text{M}^{-1}$$

| Sample        | Approximated $\epsilon$             |
|---------------|-------------------------------------|
| Thioredoxin   | 13940 $\text{cm}^{-1}\text{M}^{-1}$ |
| Tetrazine-Trx | 25309 $\text{cm}^{-1}\text{M}^{-1}$ |

The measured areas from the FPLC chromatograms are:

| Sample          | Area of peaks at 13 min |
|-----------------|-------------------------|
| Tetrazine-Trx   | 19.11 mAU/mL            |
| Regenerated-Trx | 8.92 mAU/mL             |

The measured tetrazine-thioredoxin absorbance ( $A_{meas}$ ) was normalized ( $A_{norm}$ ) to account for the extinction coefficient contributed by the tetrazine to permit comparison with the regeneration thioredoxin using the equation below.

$$A_{norm} = \frac{A_{meas} \epsilon_{Trx}}{\epsilon_{tet-Trx}} = \frac{19.11 \text{mAU} * \text{mL}^{-1} * 13940 \text{cm}^{-1}\text{M}^{-1}}{25309 \text{cm}^{-1}\text{M}^{-1}} = 10.53 \text{mAU} * \text{mL}^{-1}$$

The regenerated thioredoxin yield was calculated using the equation below.

$$\frac{A_{regen-Trx}}{A_{norm-Trx}} \frac{8.92 \text{mAU} * \text{mL}^{-1}}{10.53 \text{mAU} * \text{mL}^{-1}} \times 100\% = 84.7\%$$

The FPLC chromatograms of the regenerated thioredoxin and normalized tetrazine thioredoxin have been overlaid for comparison. The calibration curve was used to approximate molecular weight which indicated a monomer/dimer system as illustrated on the figure below. The yield of the regenerated thioredoxin was also found to be ~80%, relative to the normalized tetrazine thioredoxin after calculating the measured areas from the FPLC chromatograms.

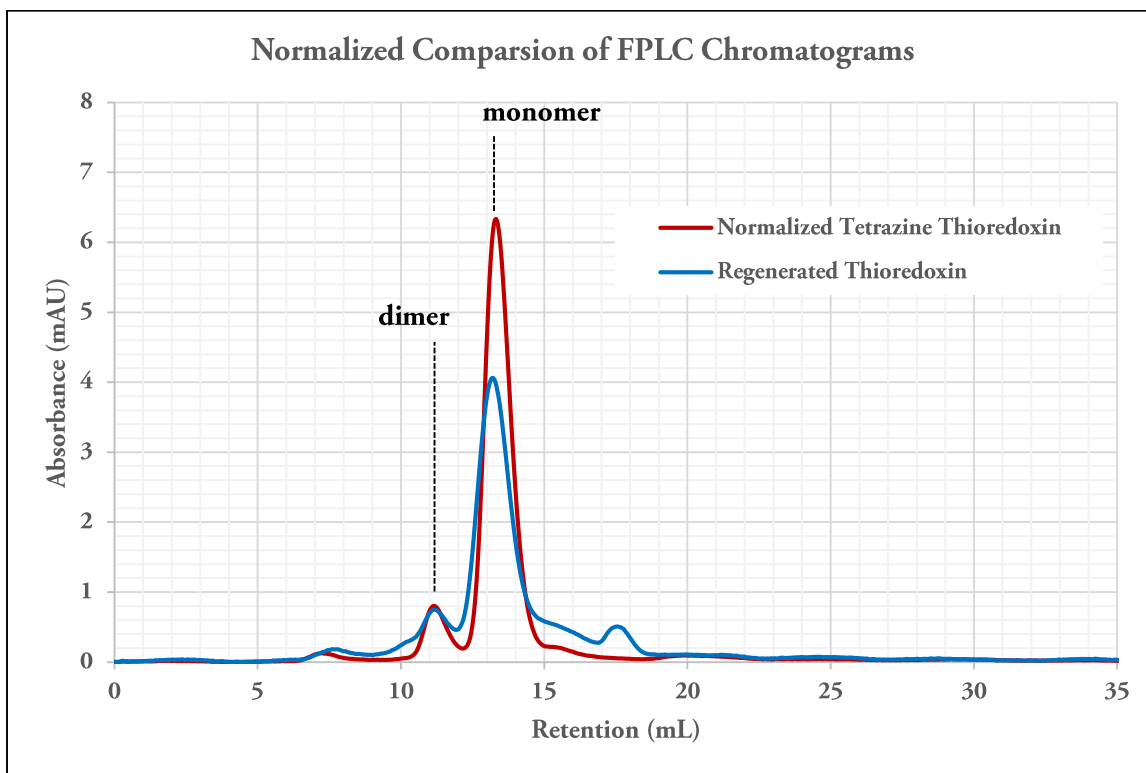

## C4-Liquid Chromatography-Mass Spectrometry Separation of Proteins

The LC-MS chromatography was carried out on the same instrument set-up mentioned in the General Methods section; however equipped with Vydac 214MS C4 column (4.6 × 150 mm; 5 μm, part # 214MS5415) with linear gradient of 20%(B) – 70%(B) over 27 minutes at 1.5 mL/min; eluent was 0.1% TFA water(A) and 0.1% TFA in acetonitrile(B).

### Commercial Thioredoxin: C4-column, Gradient 20-70% MeCN, 27 min, 1.5 mL/min

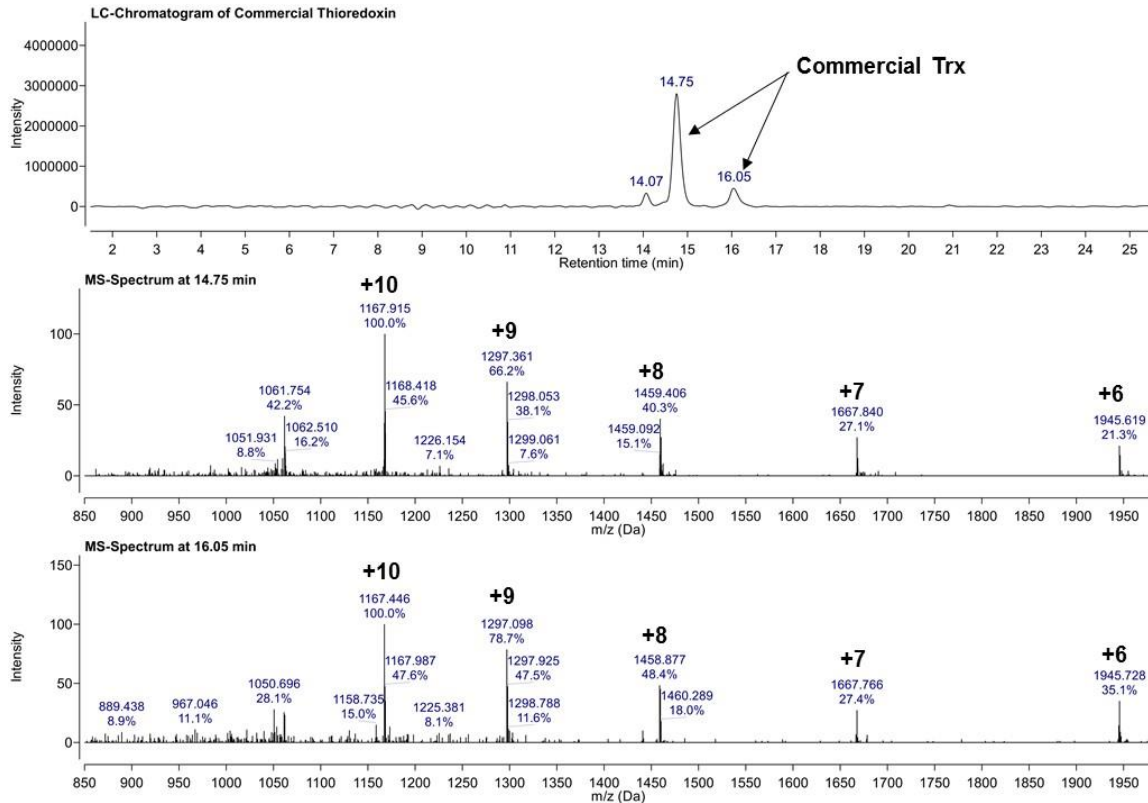

### Tetrazine Thioredoxin: C4-column, Gradient 20-70% MeCN, 27 min, 1.5 mL/min

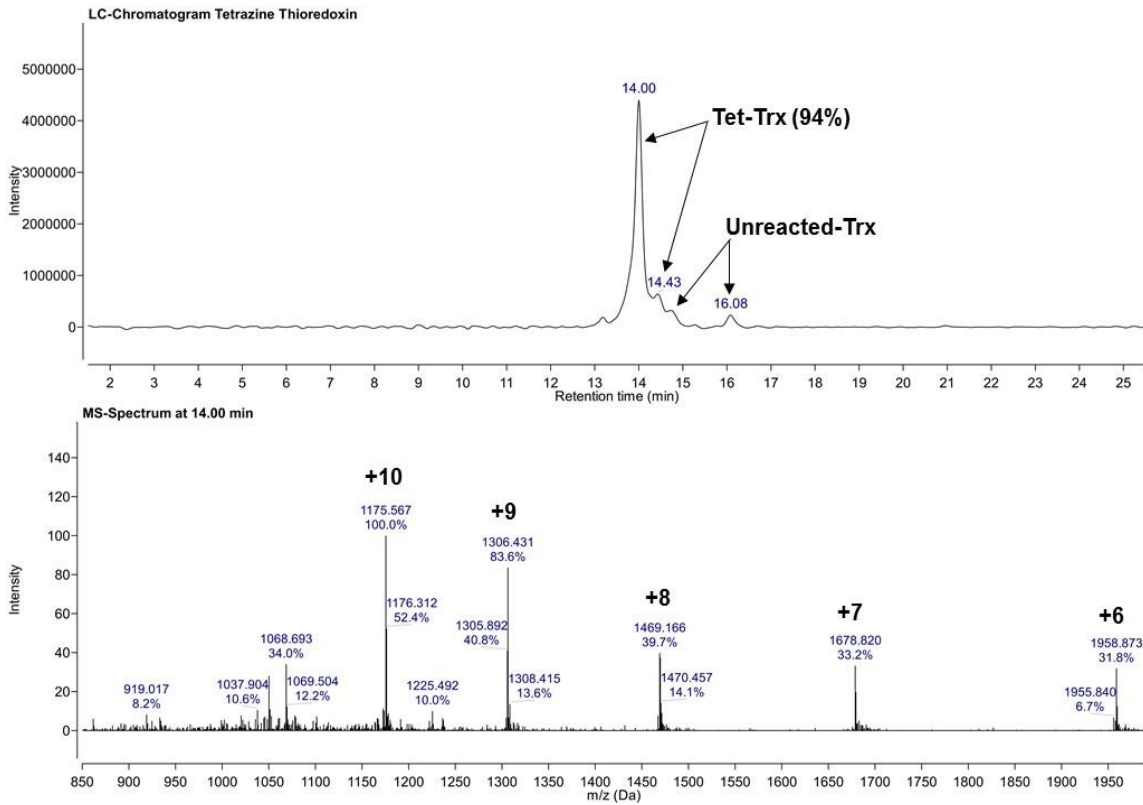

### Regenerated Thioredoxin: C4-column, Gradient 20-70% MeCN, 27 min, 1.5 mL/min

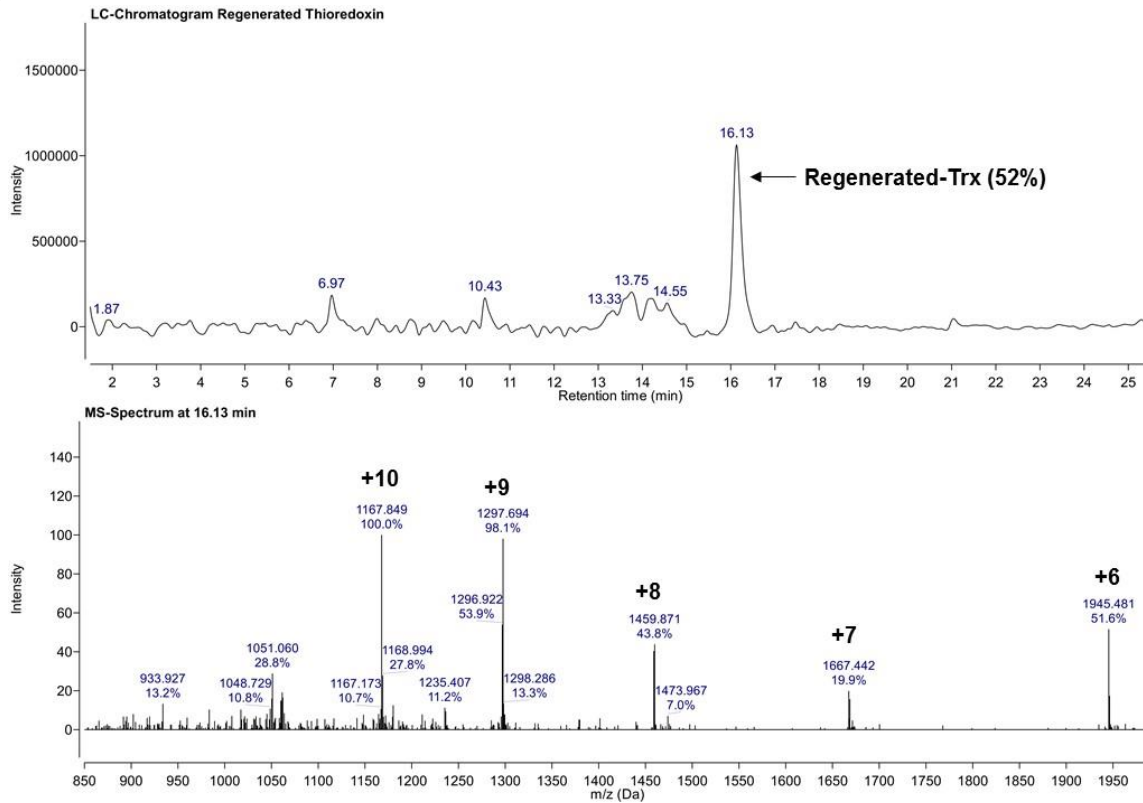

# Stacked Comparison of the Stapling and Unstapling of Thioredoxin

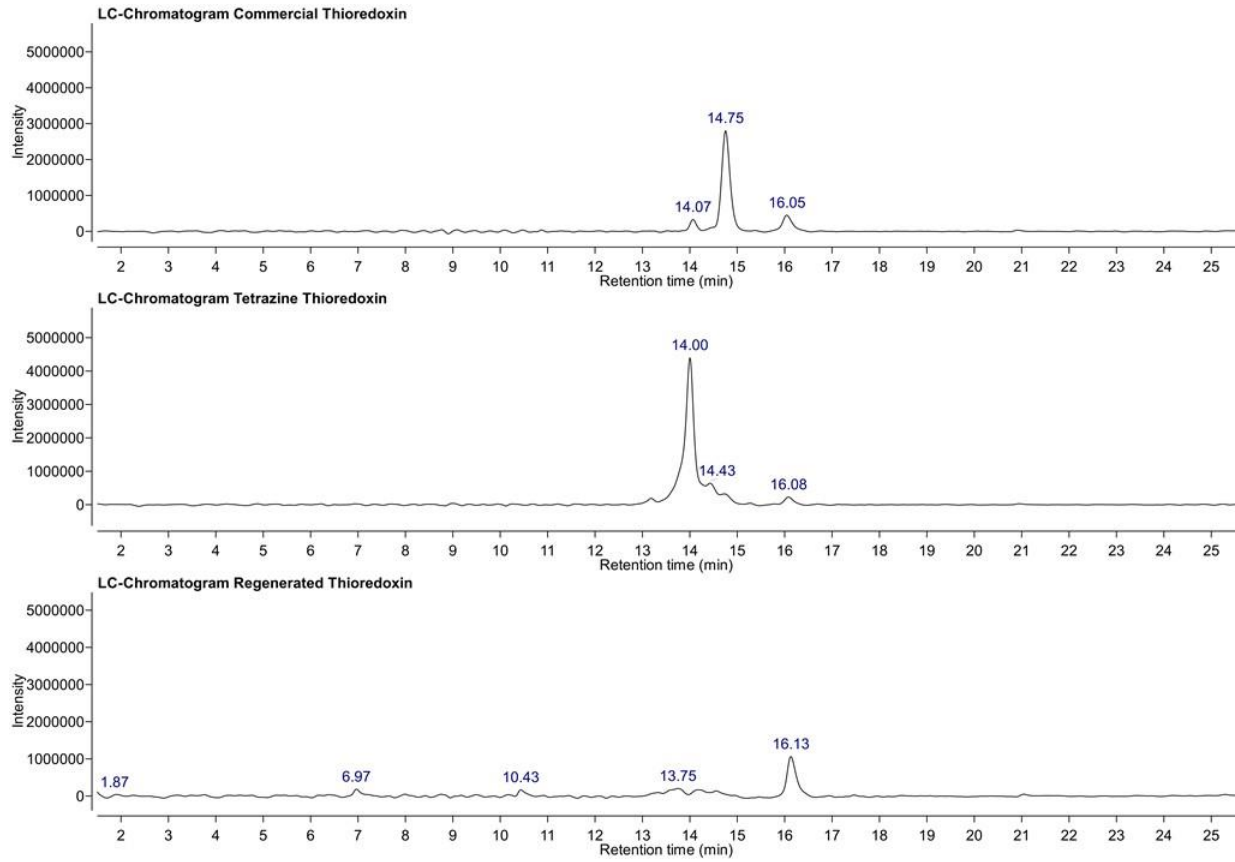

## Measurement of Regenerated Thioredoxin Bioactivity

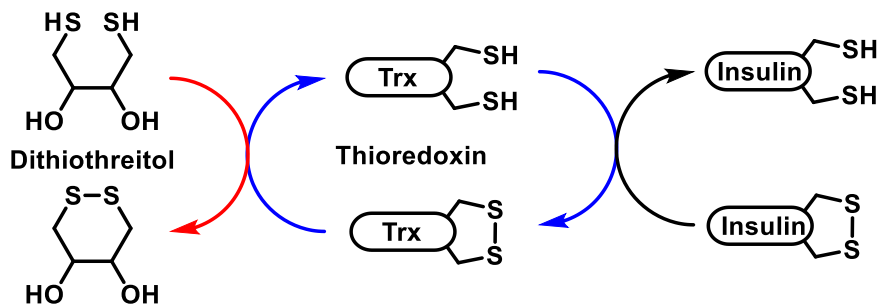

Thioredoxin activity was measured by following the reduction of insulin described by the method of Xianqin Yang and Kesen Ma, *Journal of Bacteriology*, **2010**, 192(5), 1370–1376.

The standard thioredoxin assay mixture, prepared in 200  $\mu$ L overall volume, contained 50 mM sodium phosphate buffer, pH 7.0, 1 mM EDTA, 0.15 mM human insulin, 1 mM dithiothreitol. The amounts of native thioredoxin *E. coli*, tetrazine thioredoxin, and regenerated thioredoxin were varied, concentrations of protein were determined by Bradford assay. Sample were run in duplicate, the increase in turbidity from the reduction of insulin was monitored at 650 nm at 30°C by a Tecan plate reader.

The kinetic curves were baseline corrected by subtracting from insulin reduction by dithiothreitol alone. The corrected slopes from the kinetic data ( $\Delta$ mAU/min), in the linear region, were plotted as a function of concentration of protein.

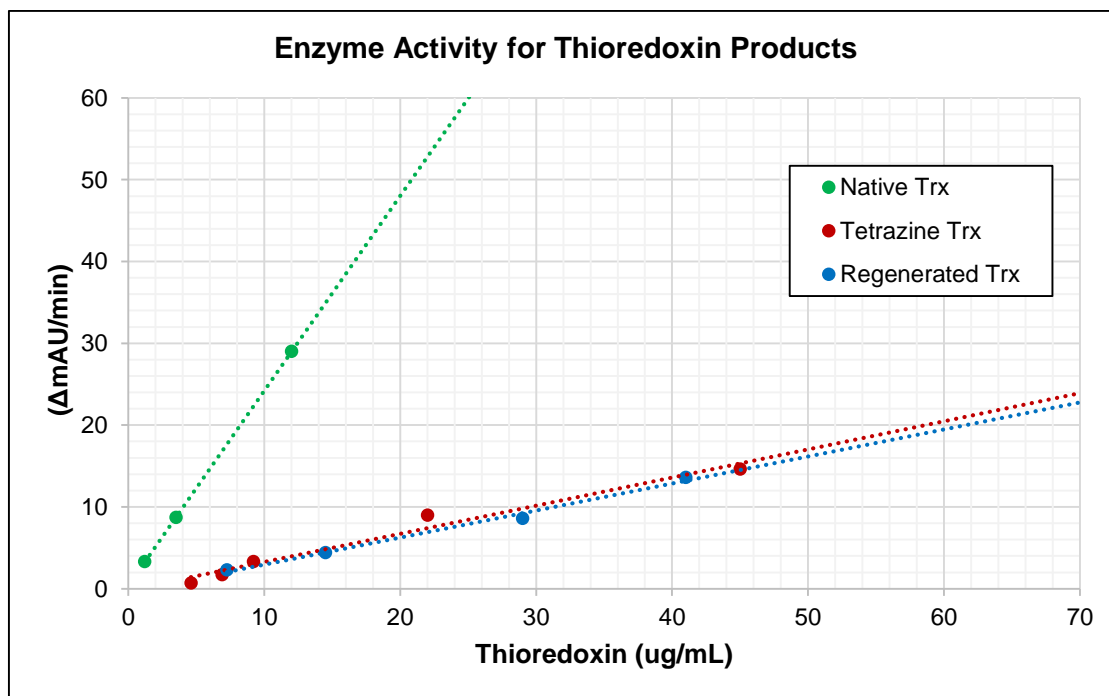

## Inverse-Electron Demand Diels-Alder Reaction of Bicyclononyne with Tetrazine Thioredoxin

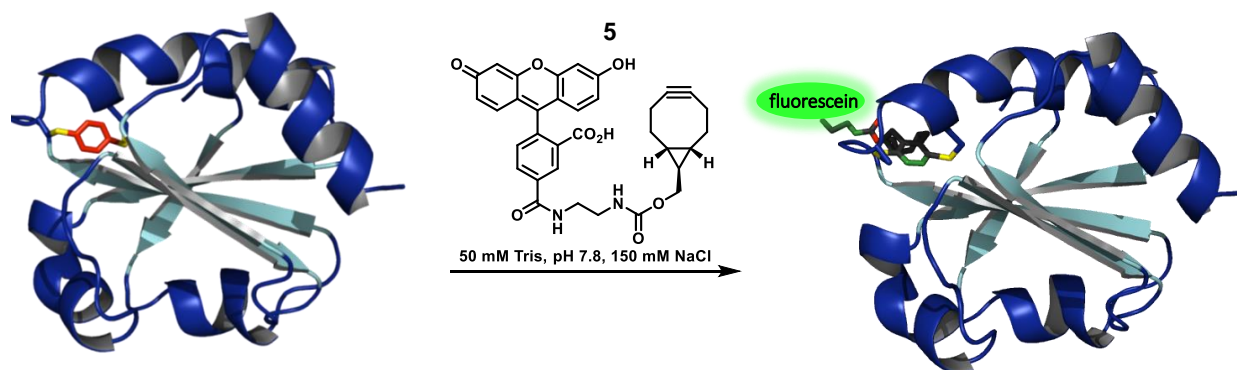

To a 1.7 mL mini-centrifuge tube containing tetrazine thioredoxin (0.05 mg, 4 nmol) dissolved in 50 mM Tris, pH 7.8, 150 mM NaCl (500  $\mu$ L) was added a solution of **5** (100  $\mu$ L, 0.024 mg, 40 nmol, 10 equiv) dissolved in the Tris buffer system. The contents were allowed to stand at ambient temperature for 10 days. The contents were next transferred for centrifugation in an Amicon centrifugal filter (MWCO 3000, 35° fixed angle rotor @ 7000 $\times$ G, 30 minutes, 4°C), the concentrated sample (150  $\mu$ L) was diluted to 3 mL with the Tris buffer and repeated. The reaction was monitored by mass spectrometry, which illustrated the loss of nitrogen and an additional mass equal to **5**. MALDI-TOF  $m/z$  12323.622 [(M+H)<sup>+</sup>; 12322.64; calculated for tetrazine Trx (11755.44) + **5** (594.20 Da) + H<sup>+</sup> (1.01) - N<sub>2</sub> (28.01)].

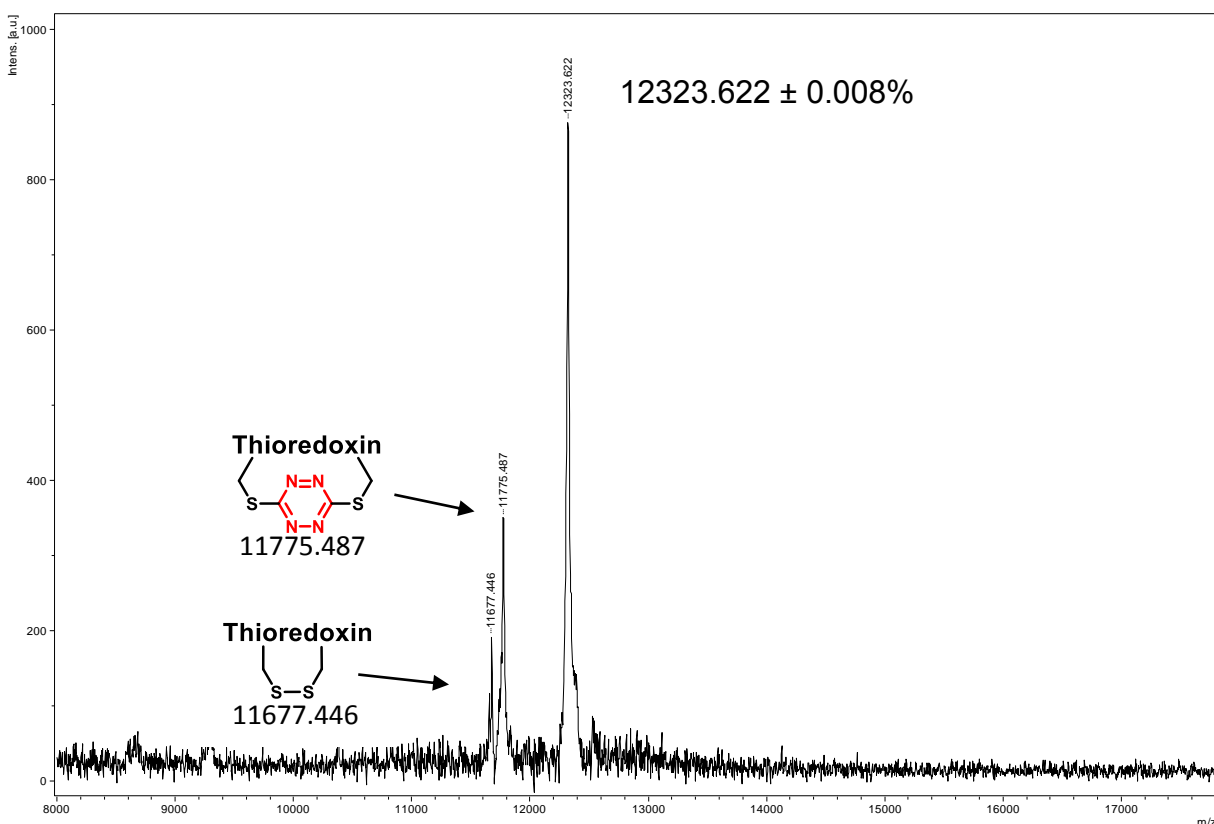



Compound 1a

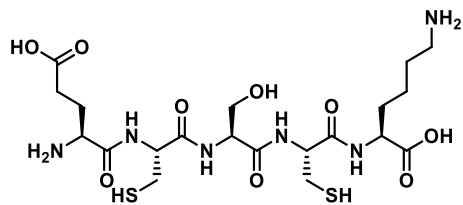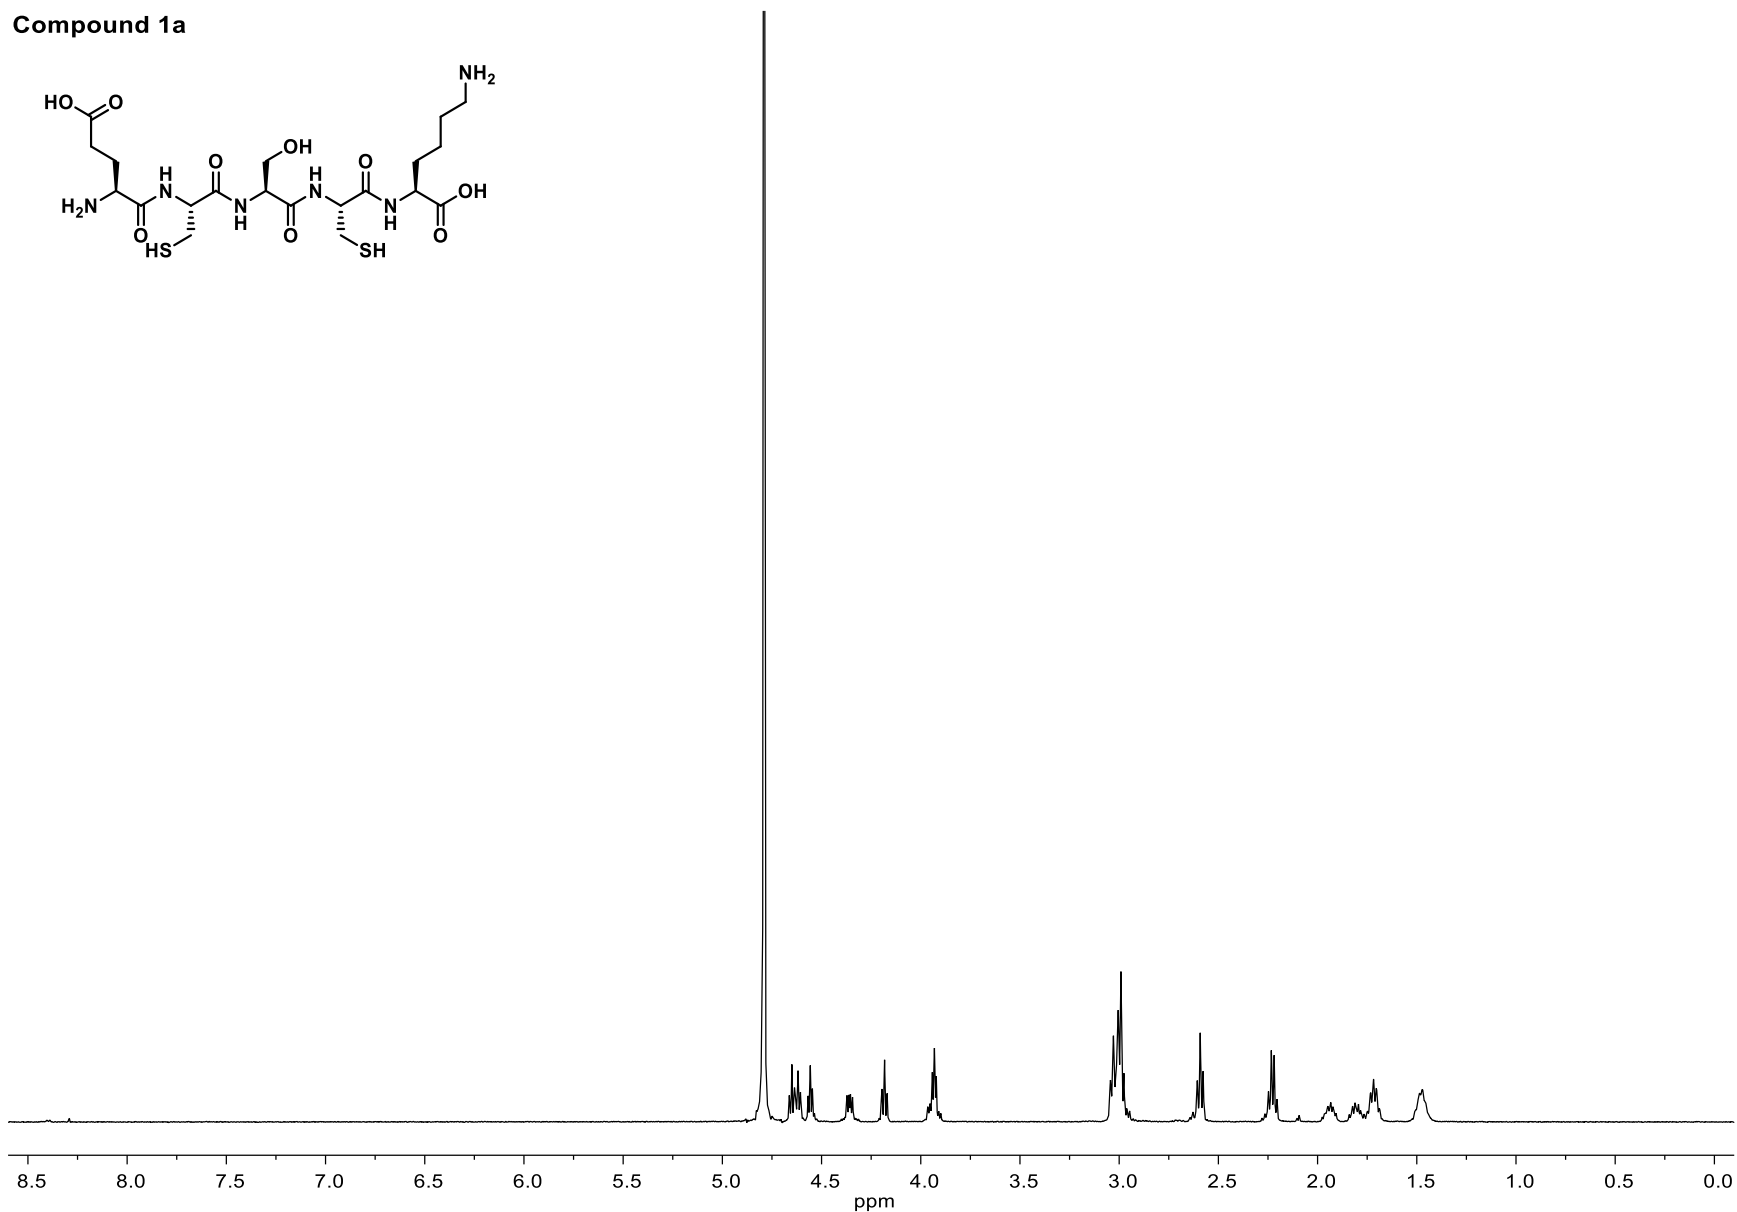

1a (<sup>1</sup>H-NMR, D<sub>2</sub>O, 500 MHz)

Compound 1a

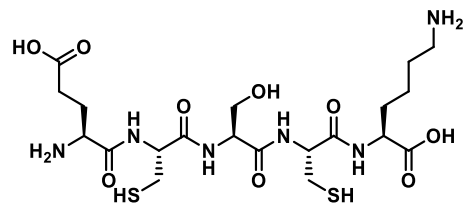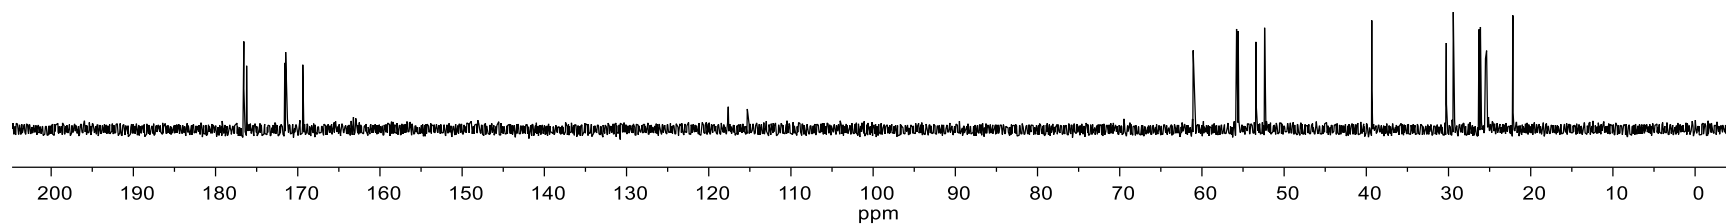

1a (<sup>13</sup>C-NMR, D<sub>2</sub>O, 126 MHz)

Compound 1b

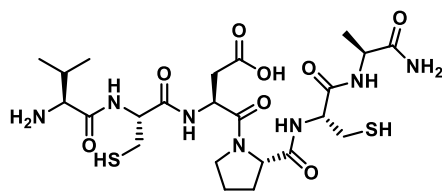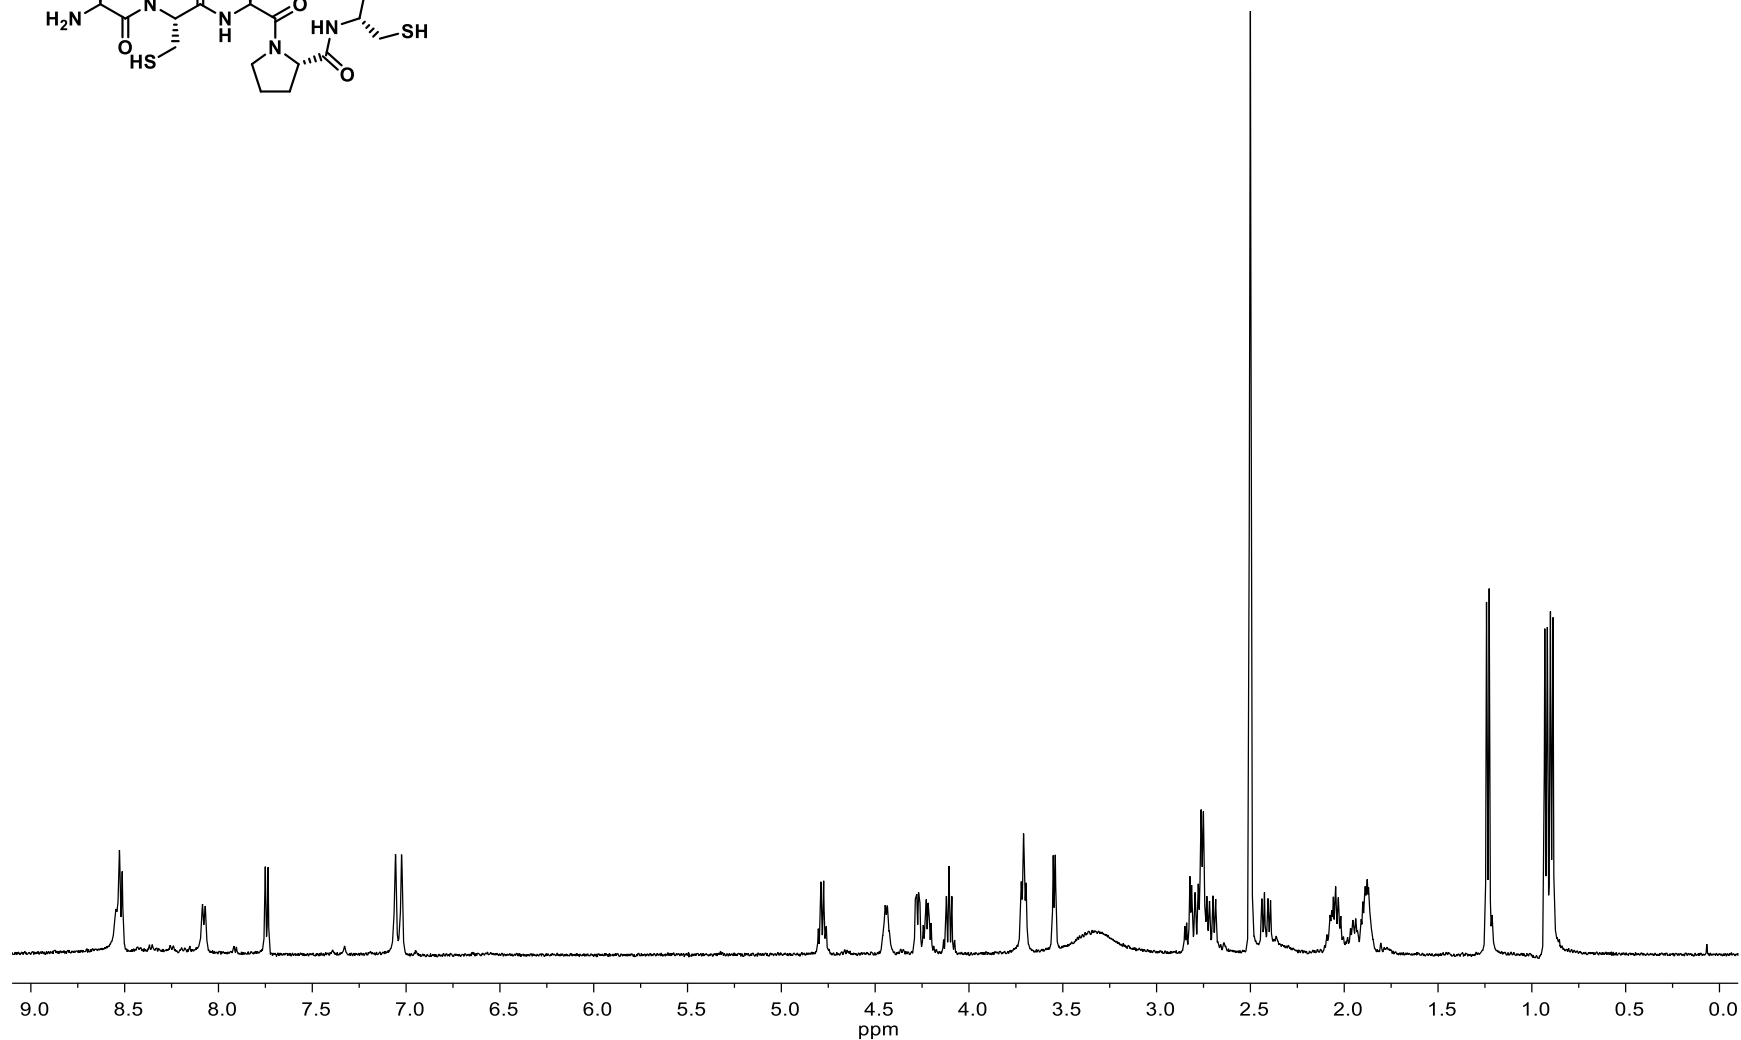

**1b** (<sup>1</sup>H-NMR, DMSO, 126 MHz)

Compound 1b

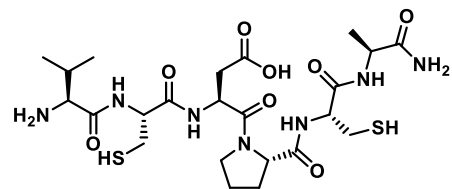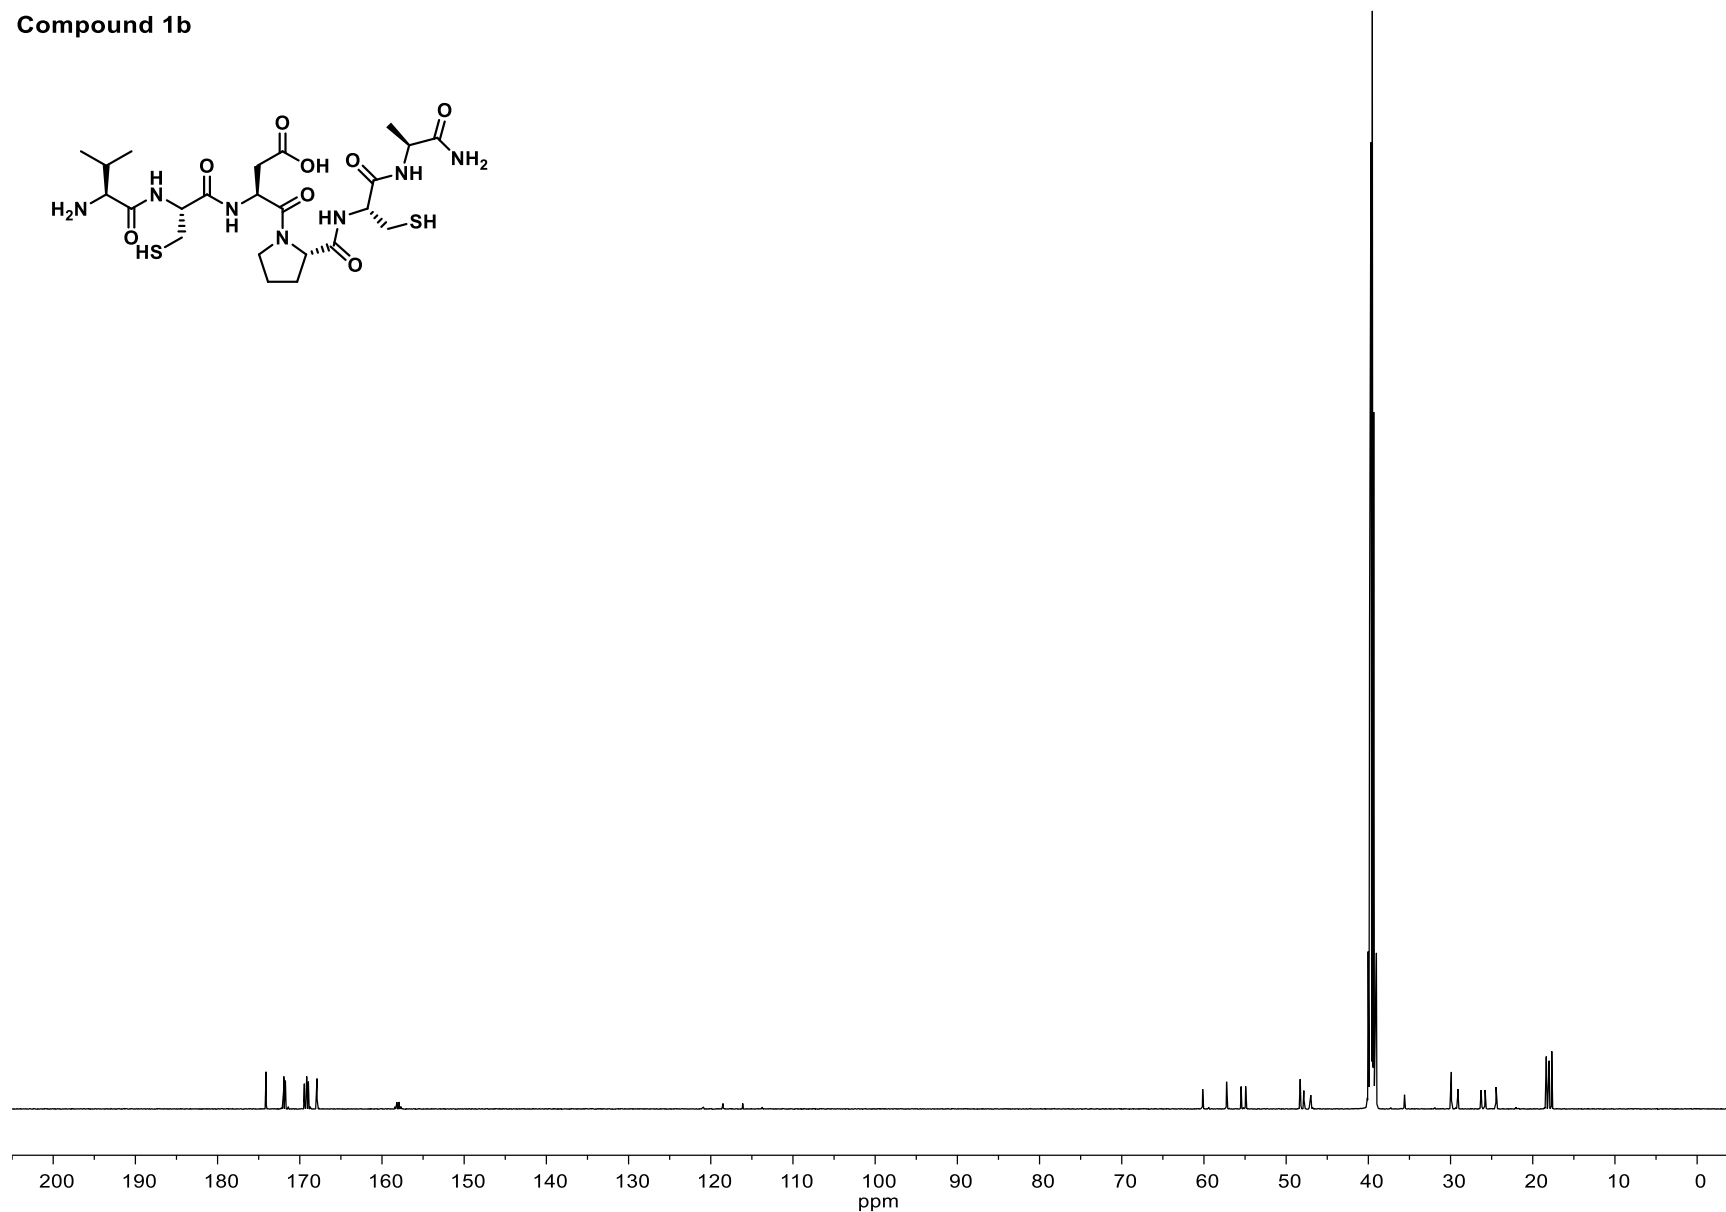

**1b** (<sup>13</sup>C-NMR, DMSO, 126 MHz)

Compound 1c

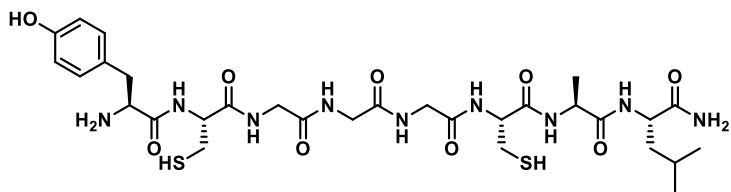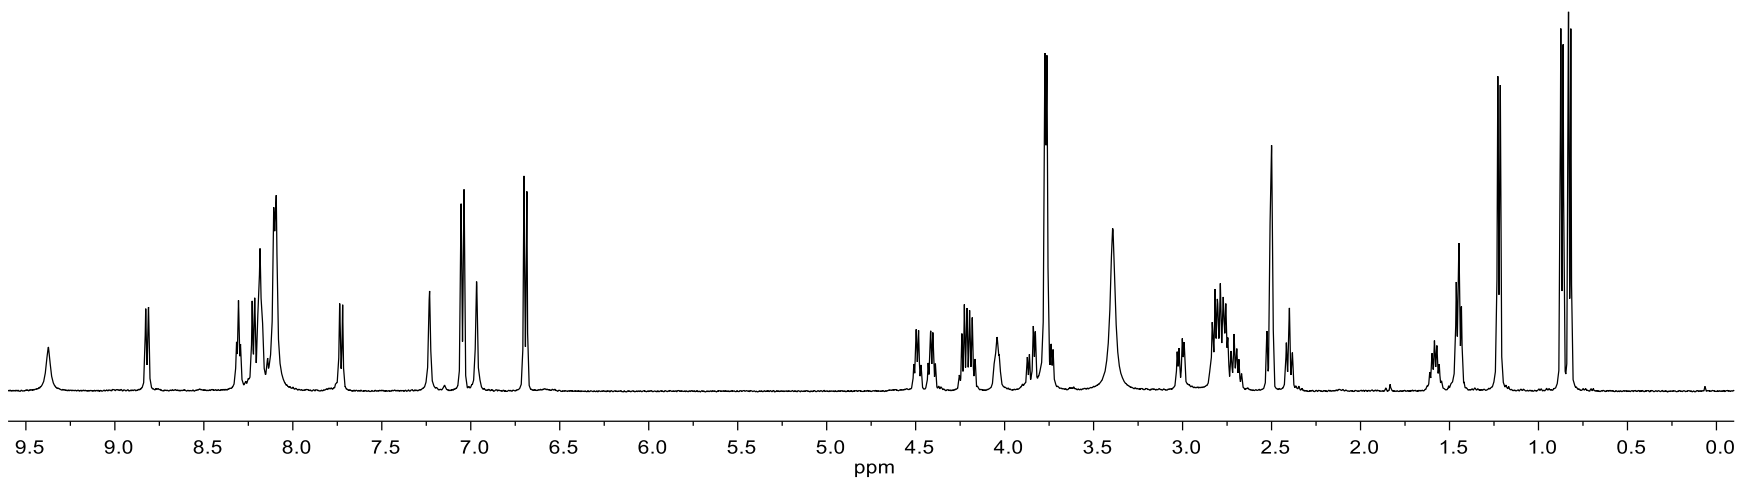

1c (<sup>1</sup>H-NMR, DMSO, 500 MHz)

Compound 1c

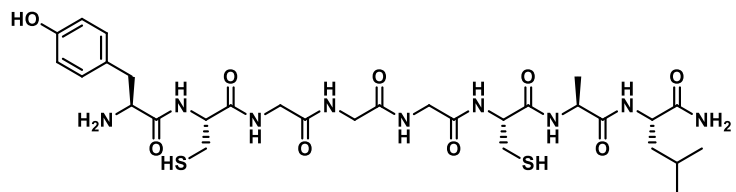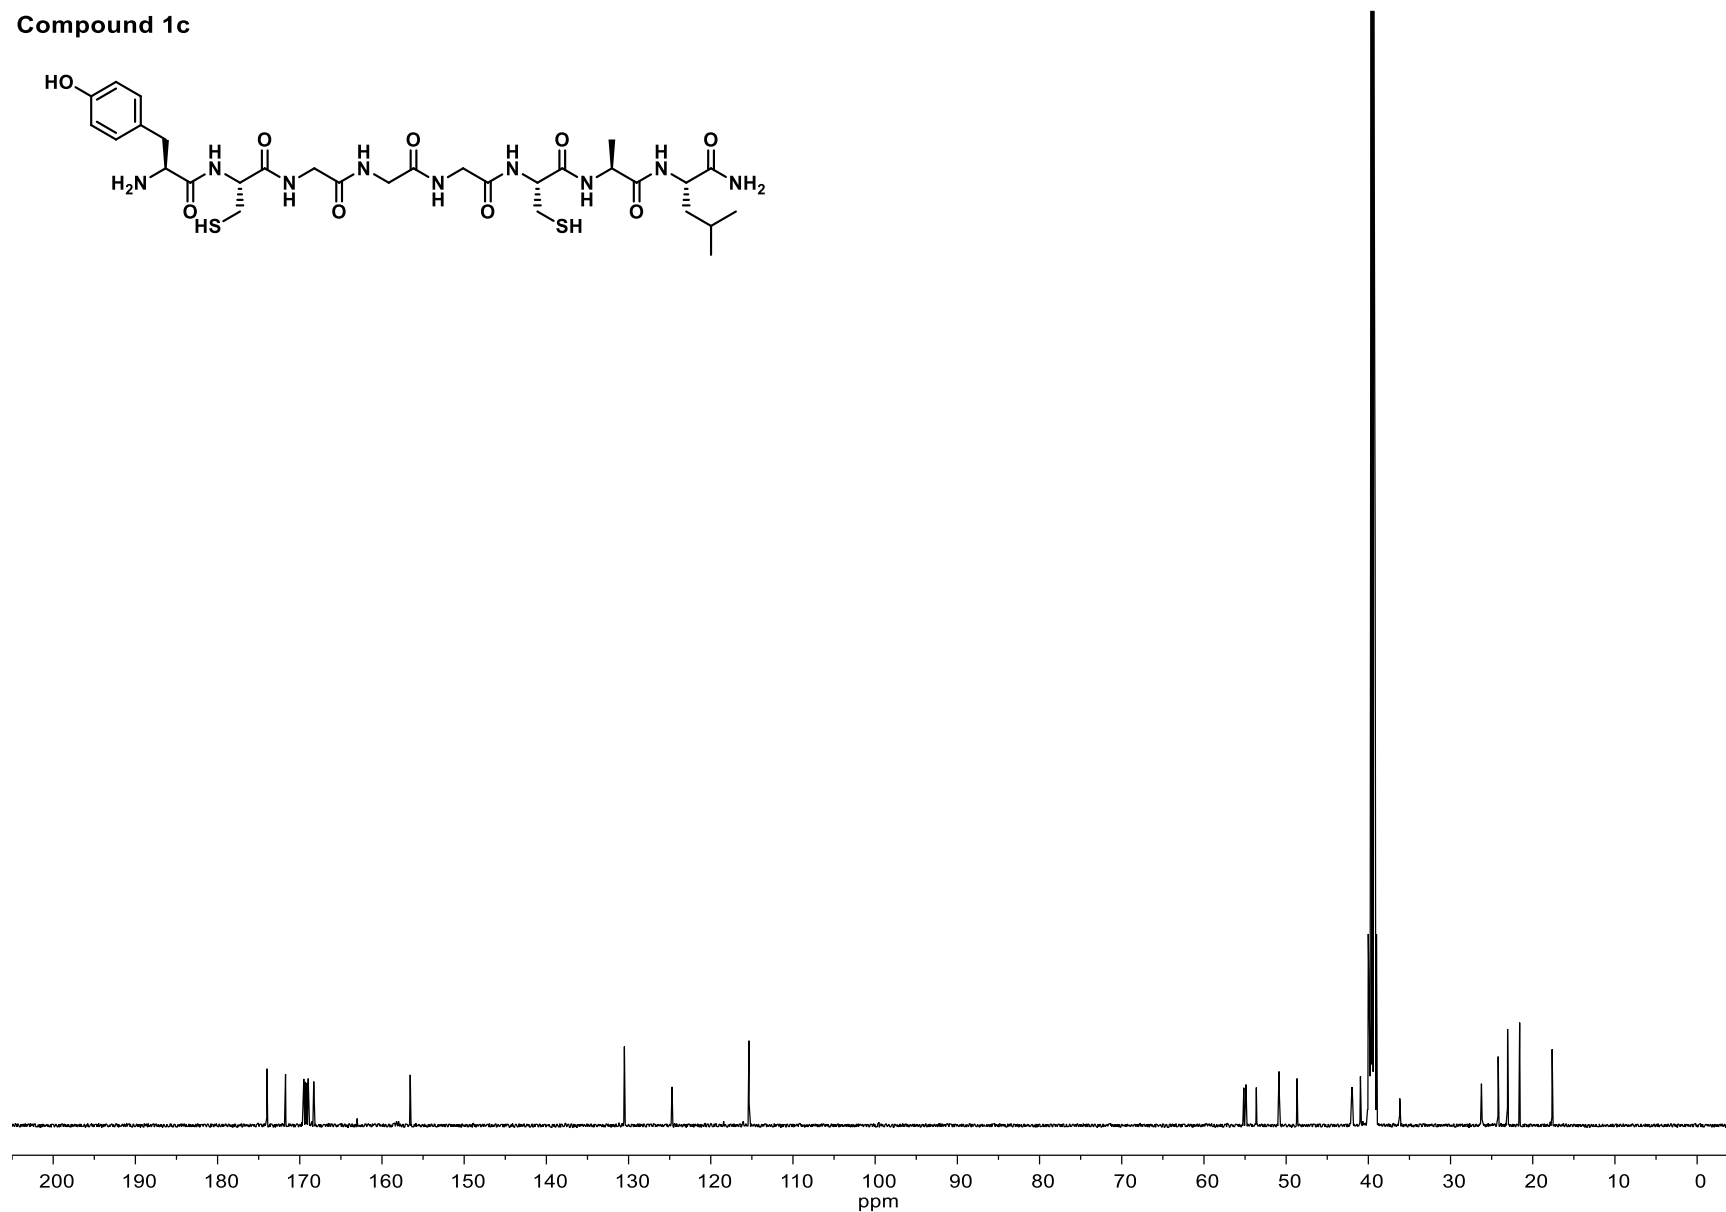

1c ( $^{13}\text{C}$ -NMR, DMSO, 126 MHz)

Compound 1c

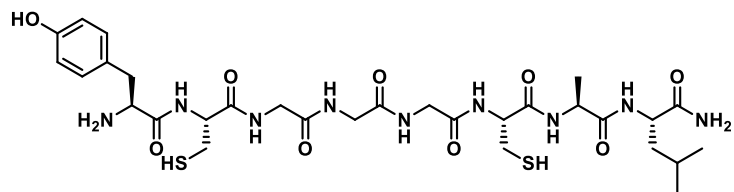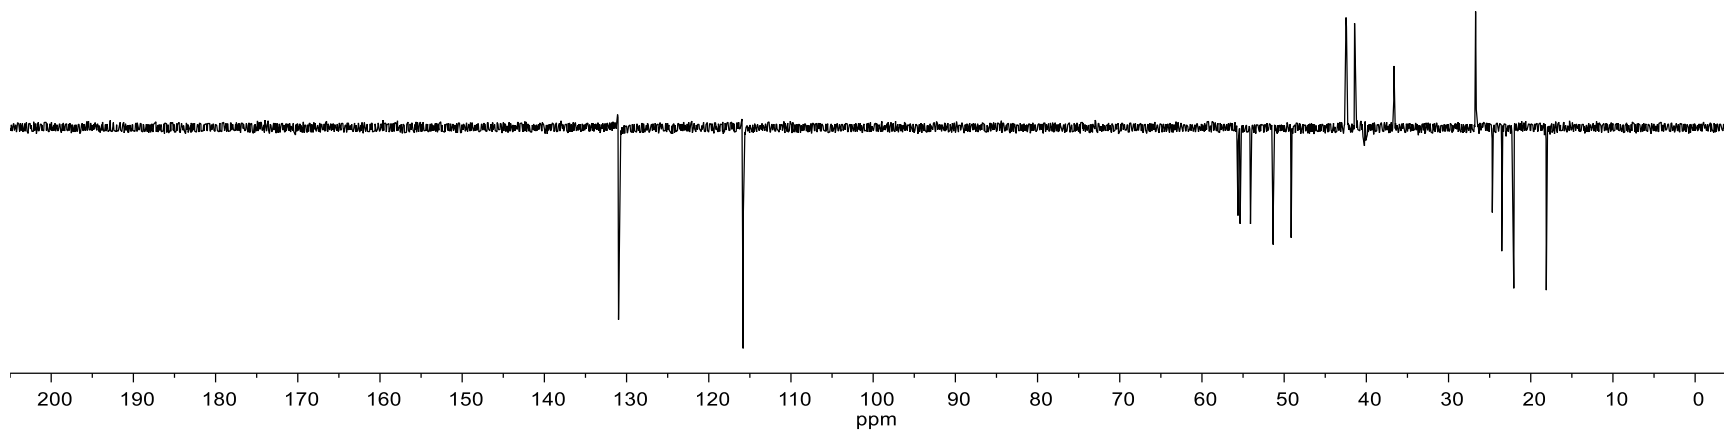

1c (DEPT135, DMSO, 126 MHz)

Compound 1d

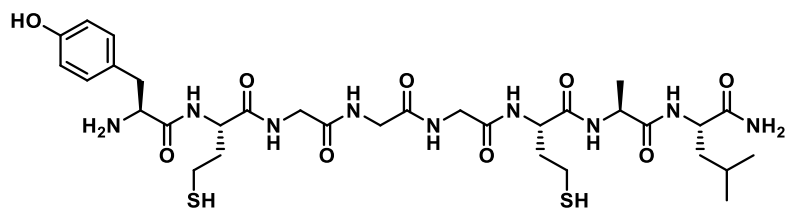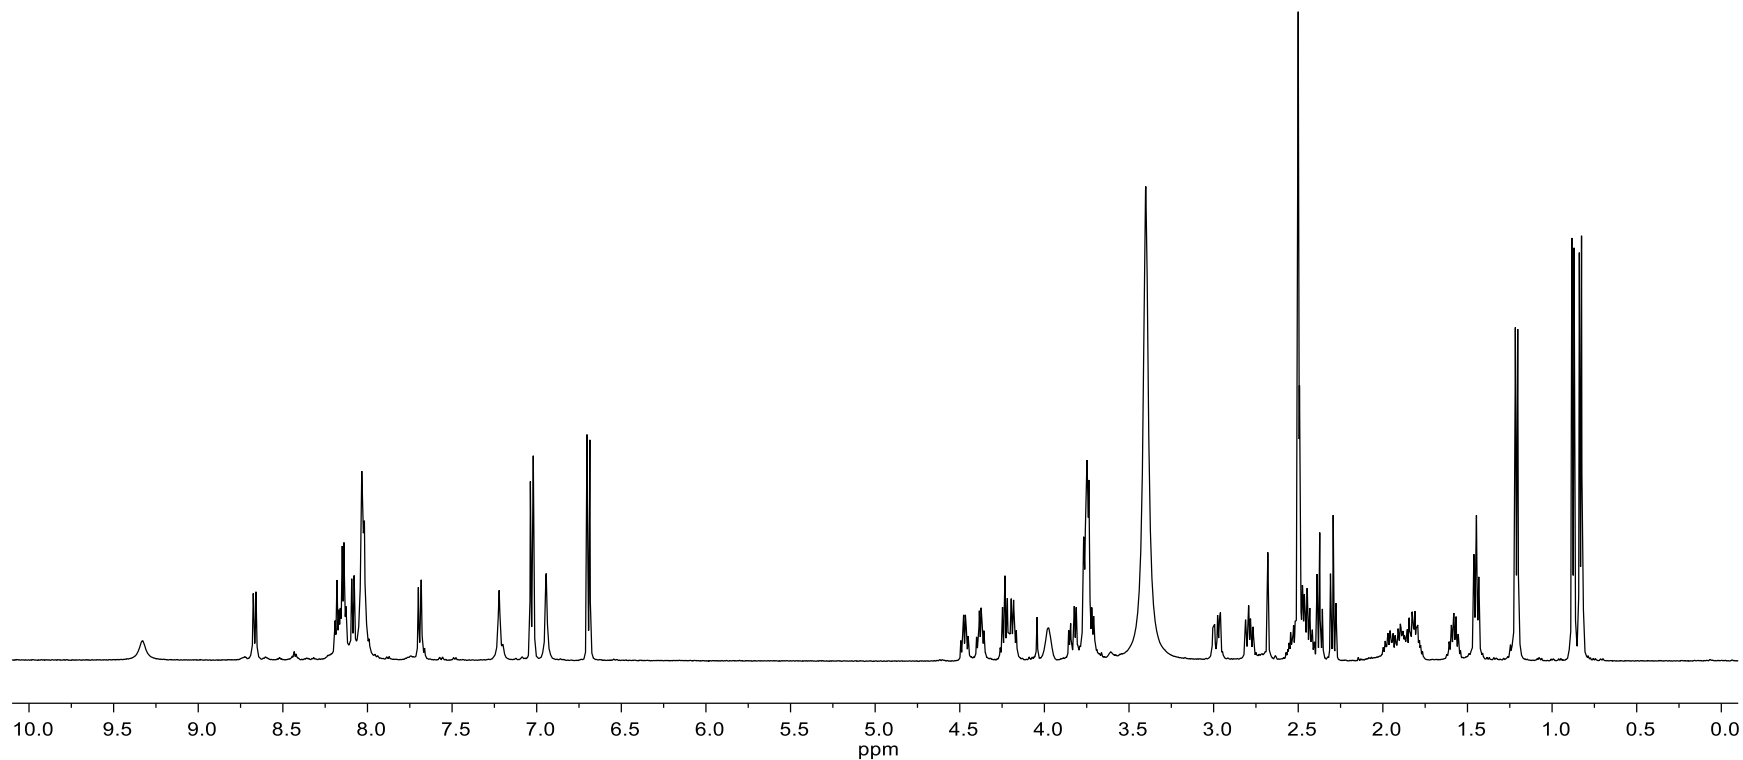

1d (<sup>1</sup>H-NMR, DMSO, 500 MHz)



Compound 1d

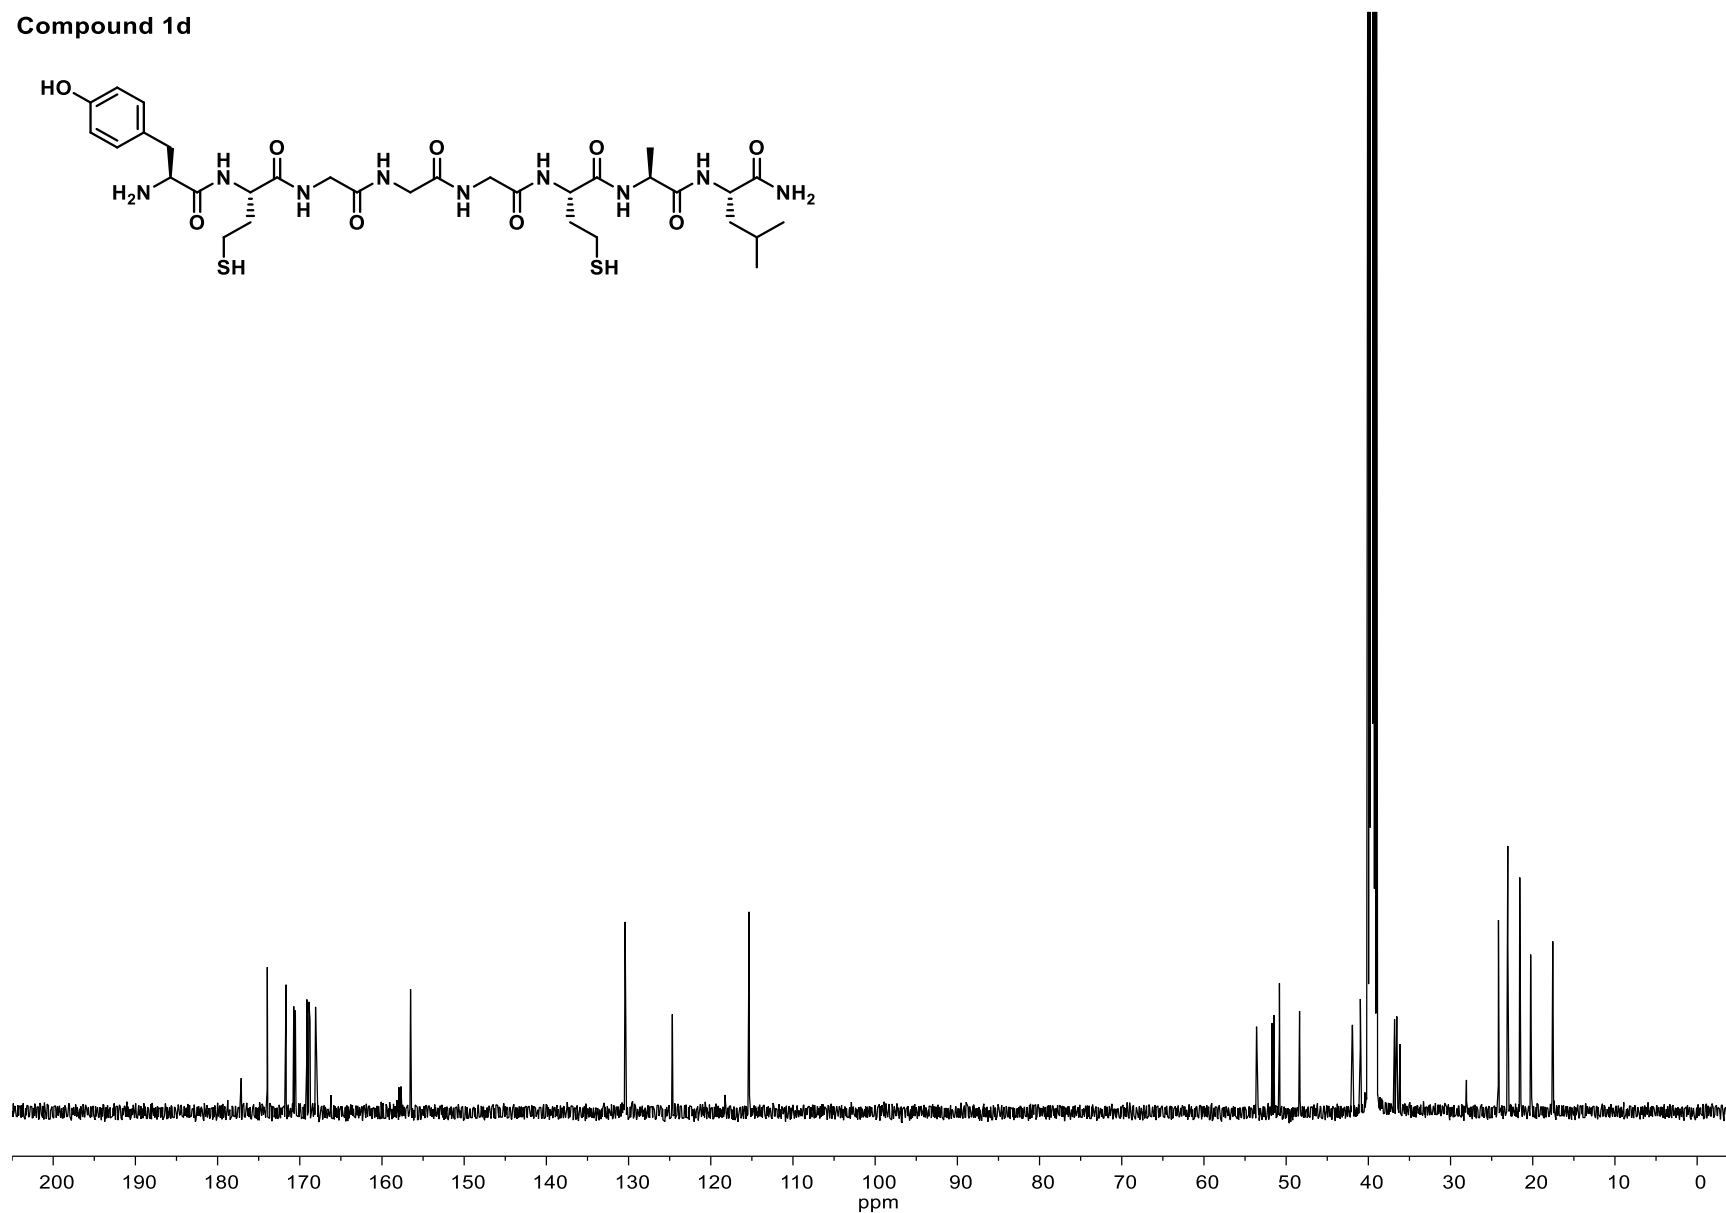

1d ( $^{13}\text{C}$ -NMR, DMSO, 126 MHz)

Compound 1e

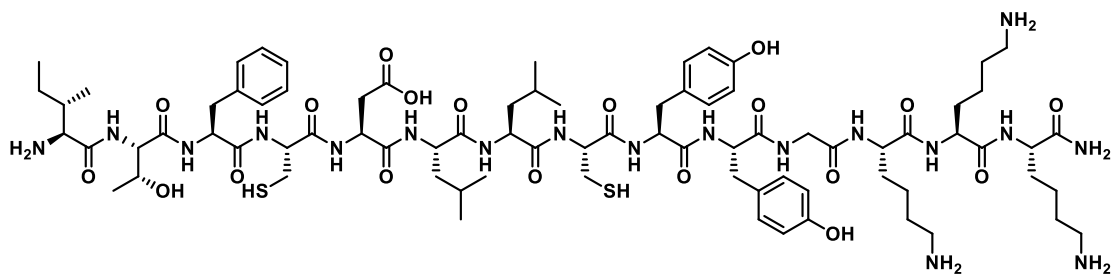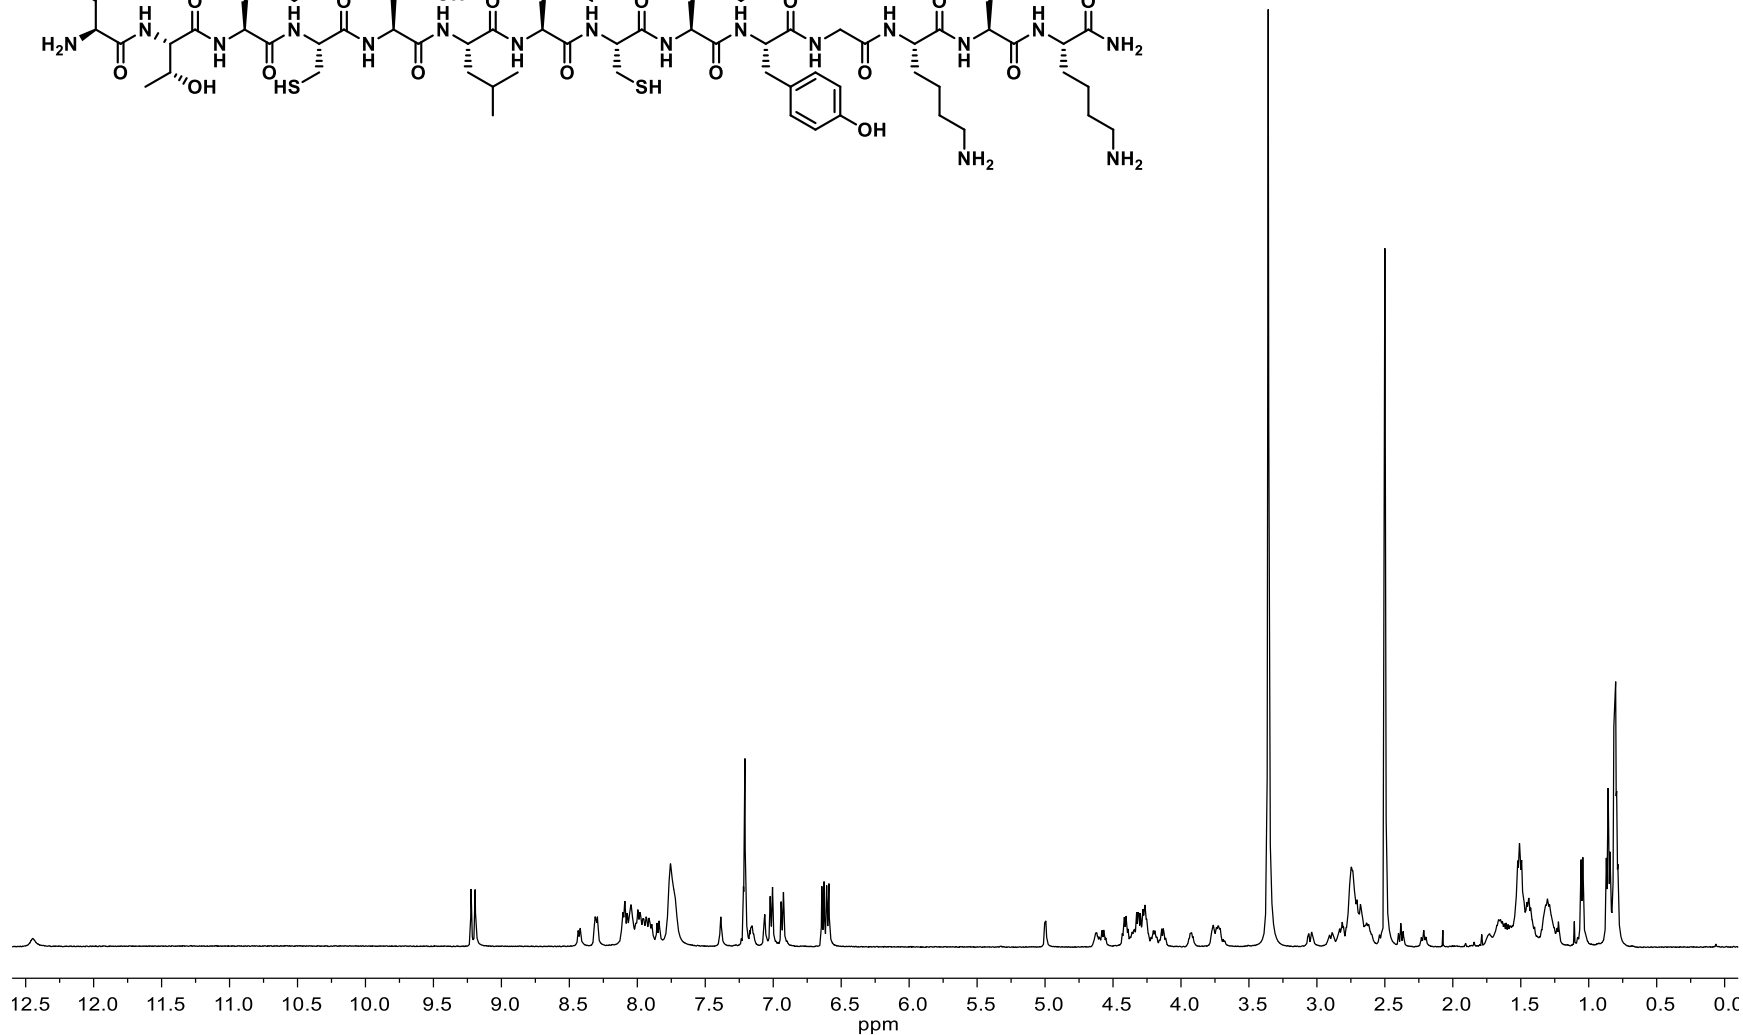

1e (<sup>1</sup>H-NMR, DMSO, 500 MHz)



Compound 1f

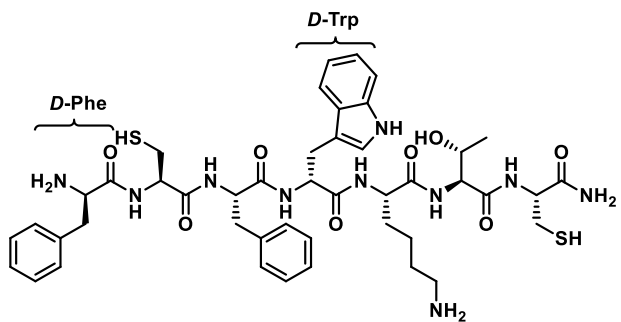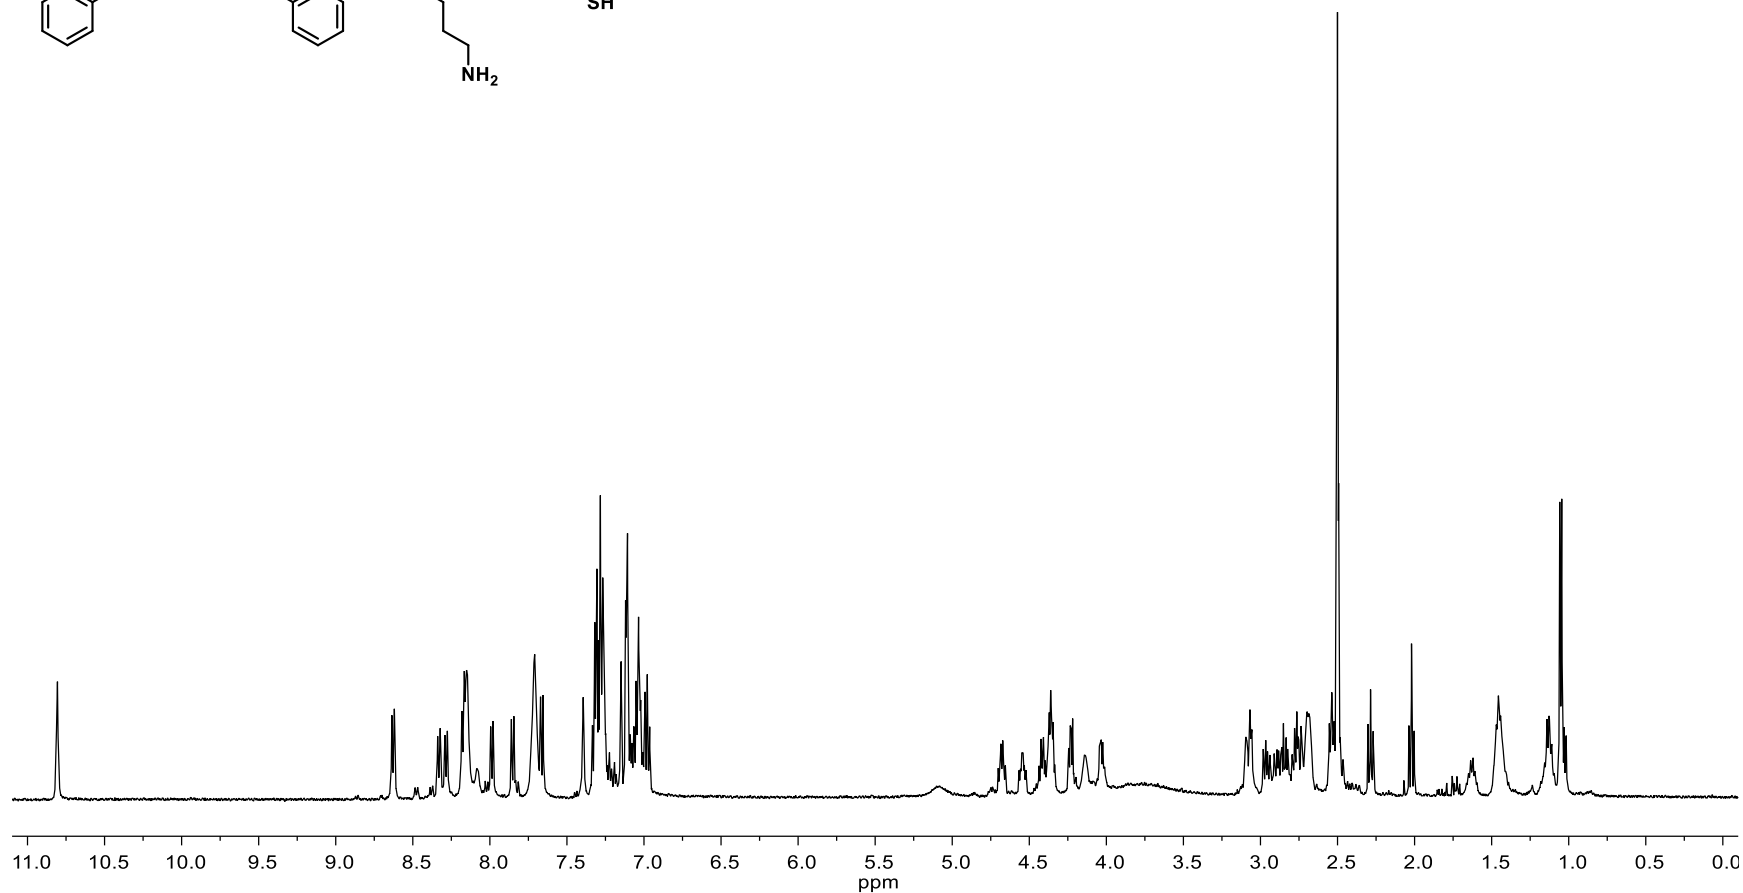

1f (<sup>1</sup>H-NMR, DMSO, 500 MHz)

Compound 1f

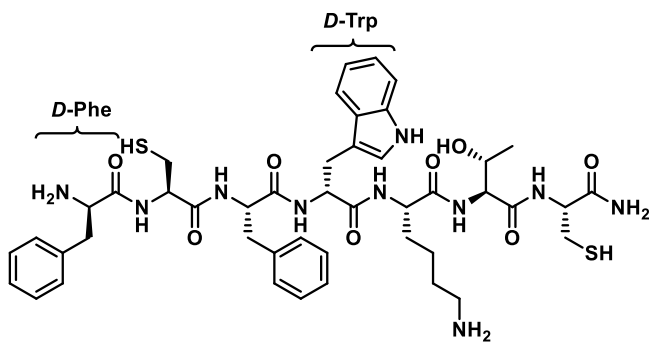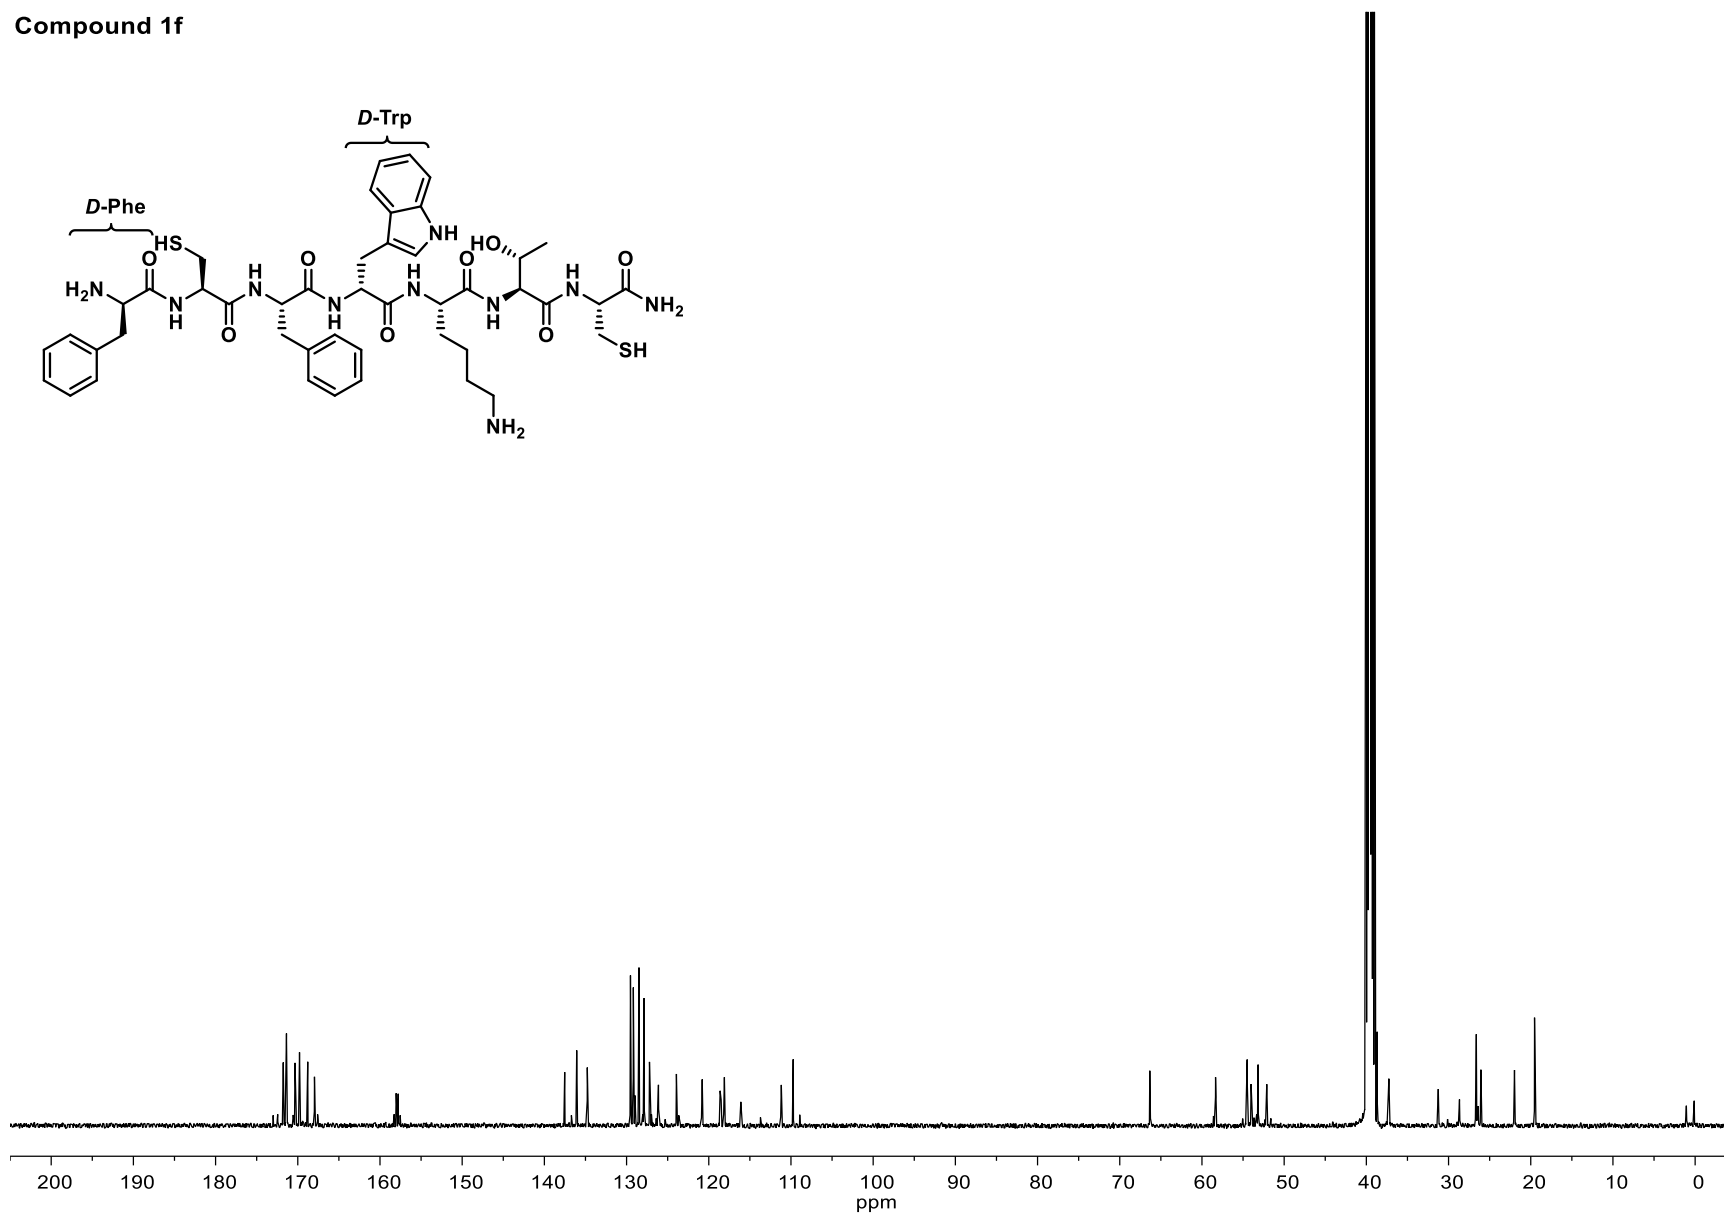

**1f** (<sup>13</sup>C-NMR, DMSO, 126 MHz)

Compound 1g

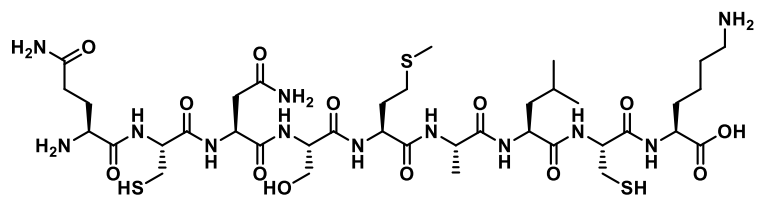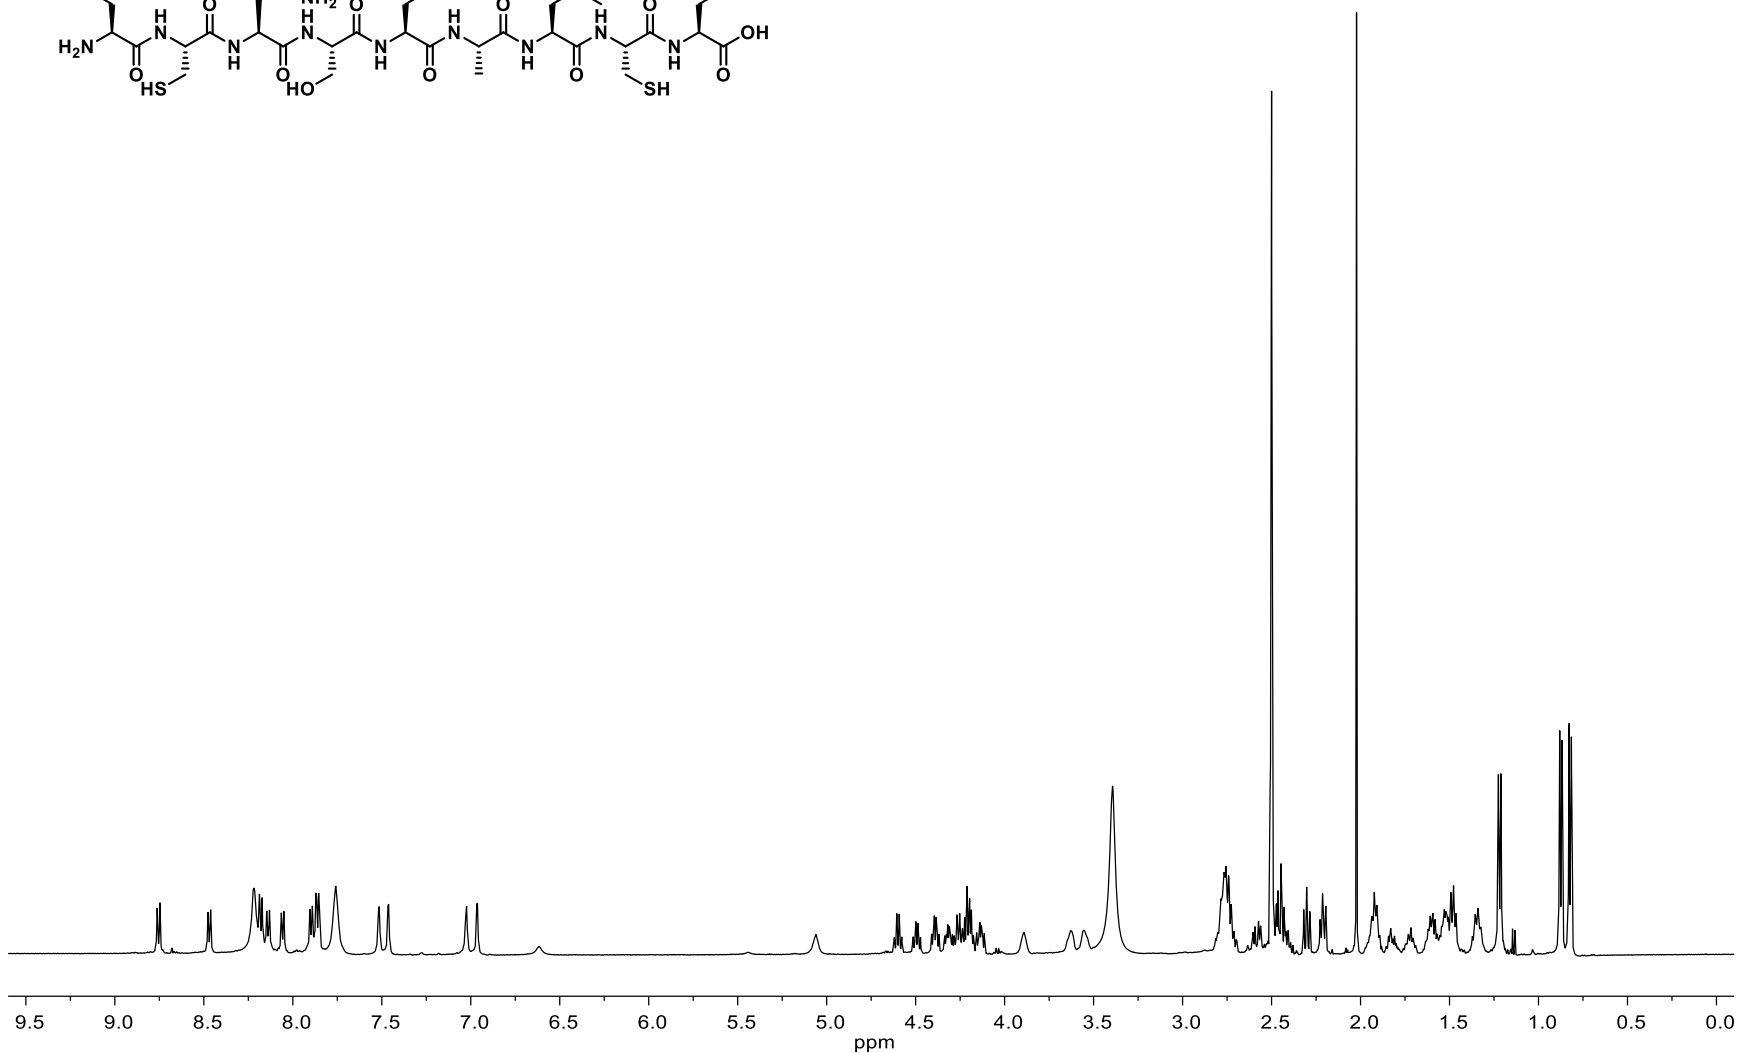

**1g** (<sup>1</sup>H-NMR, DMSO, 500 MHz)

Compound 1g

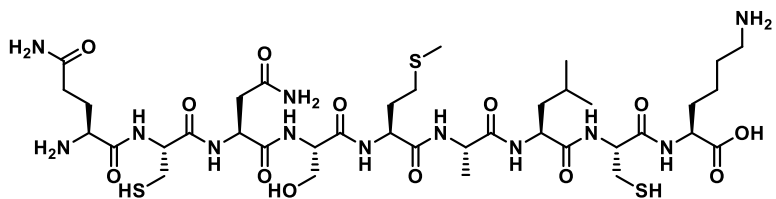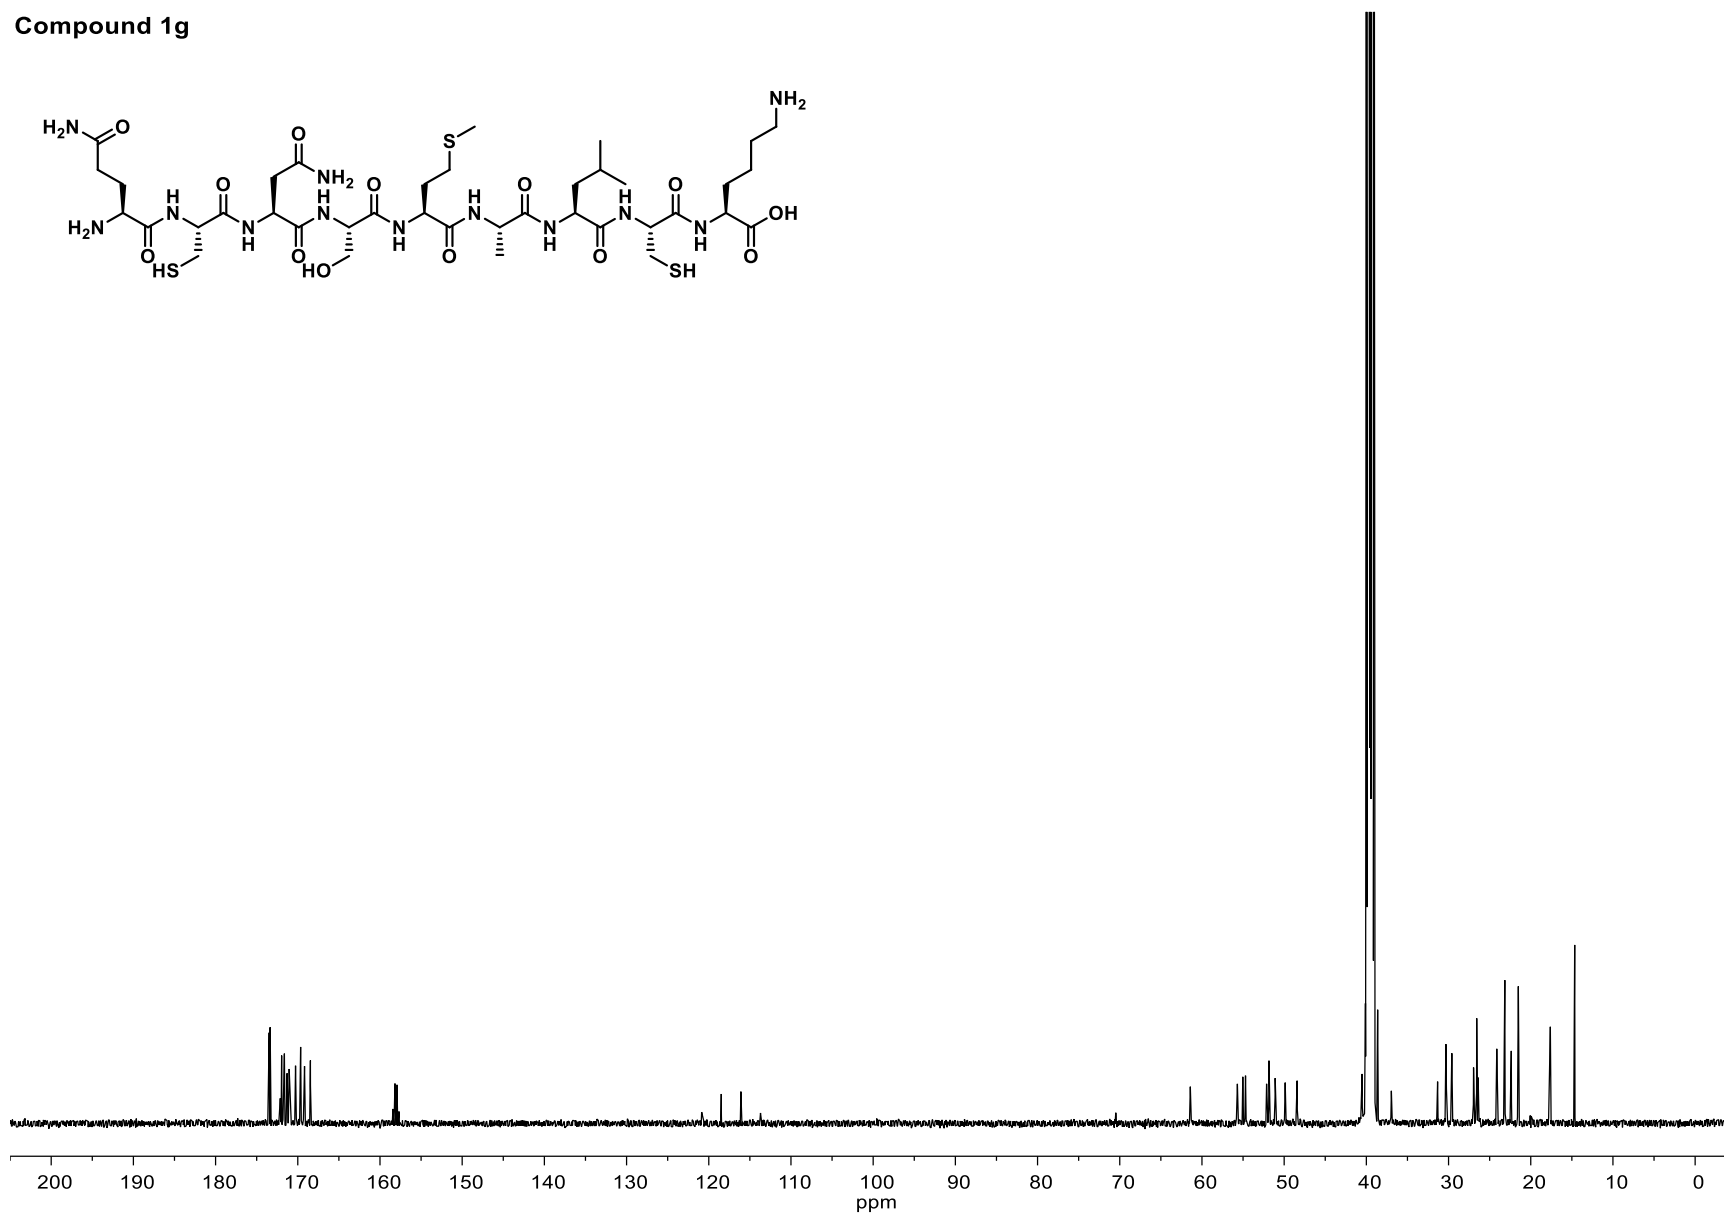

1g ( $^{13}\text{C}$ -NMR, DMSO, 126 MHz)

**Compound 1h**

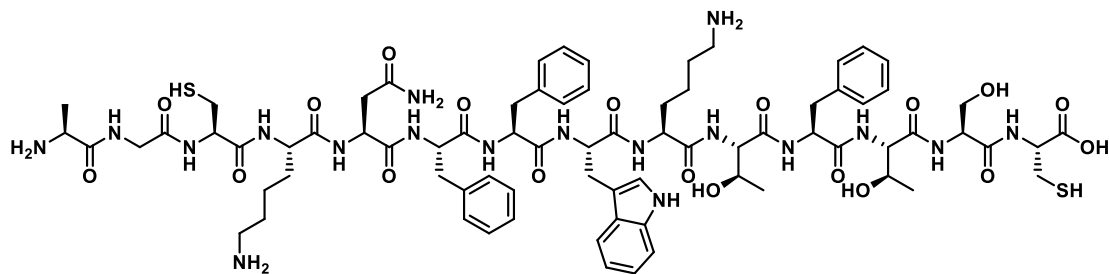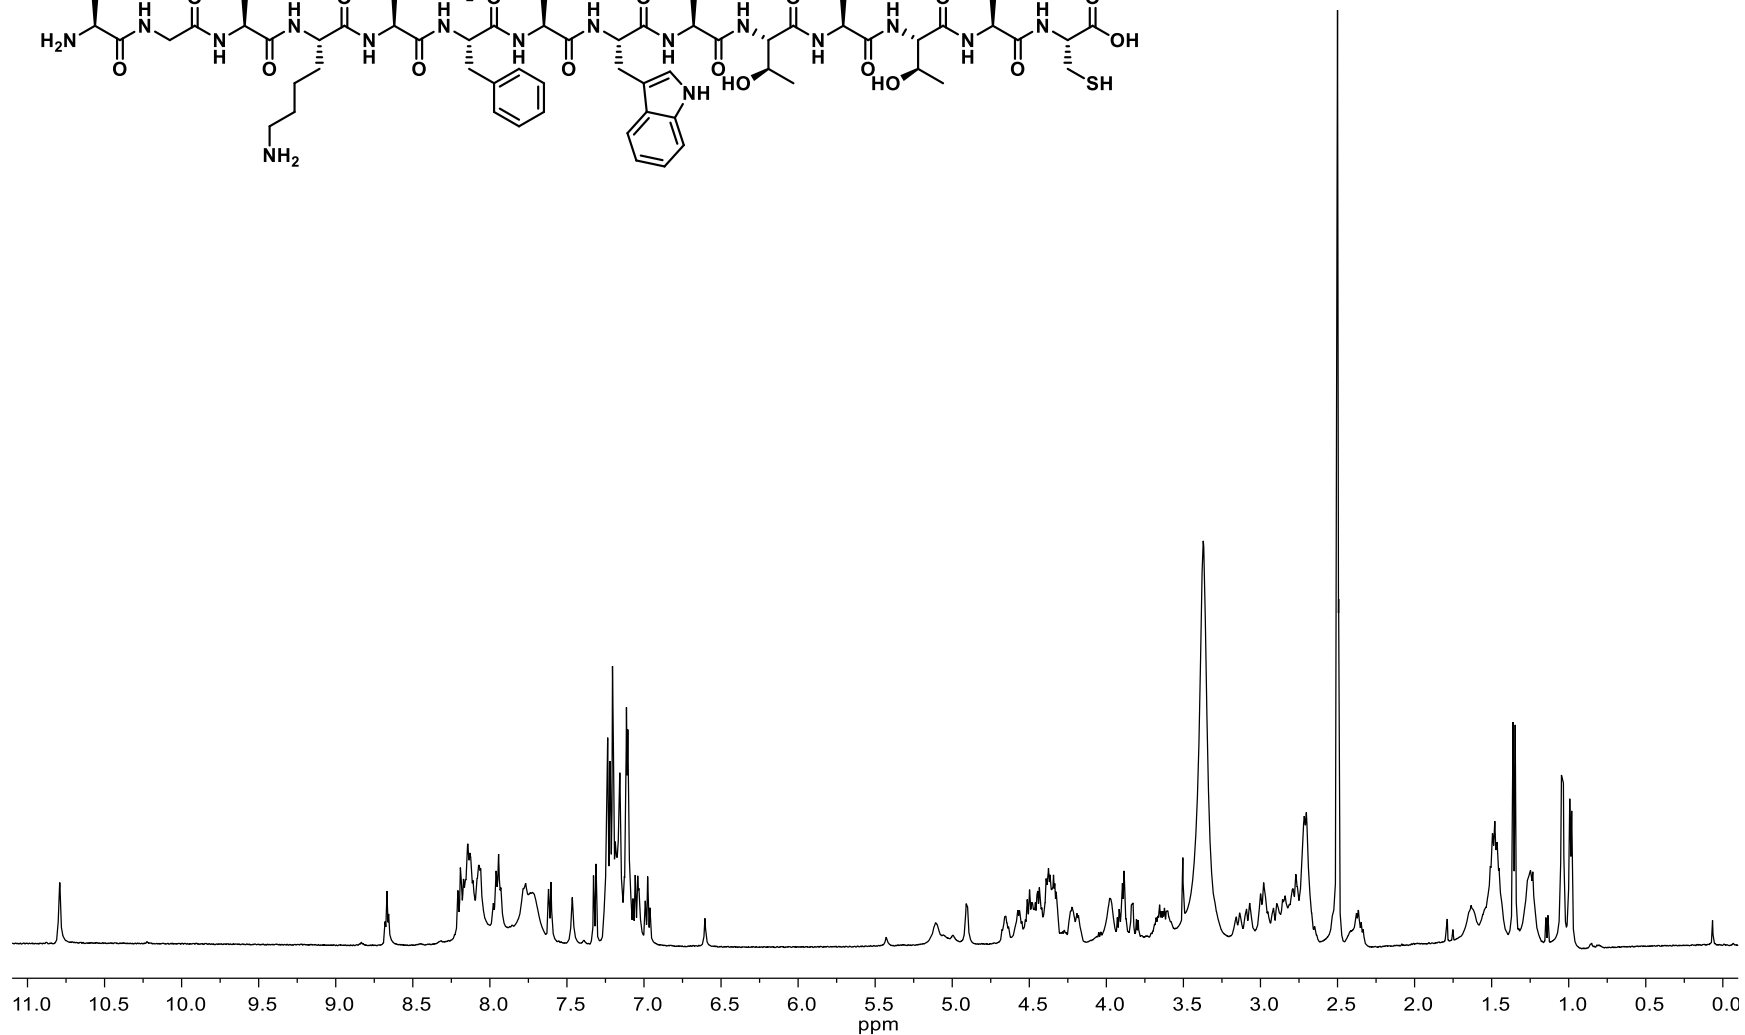

**1h** (<sup>1</sup>H-NMR, DMSO, 500 MHz)



Compound 1h

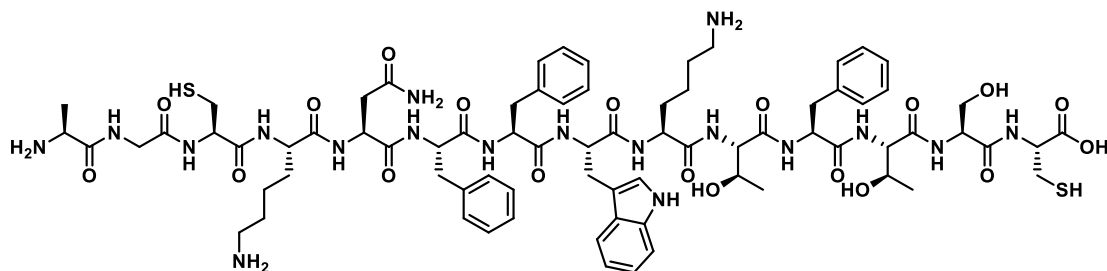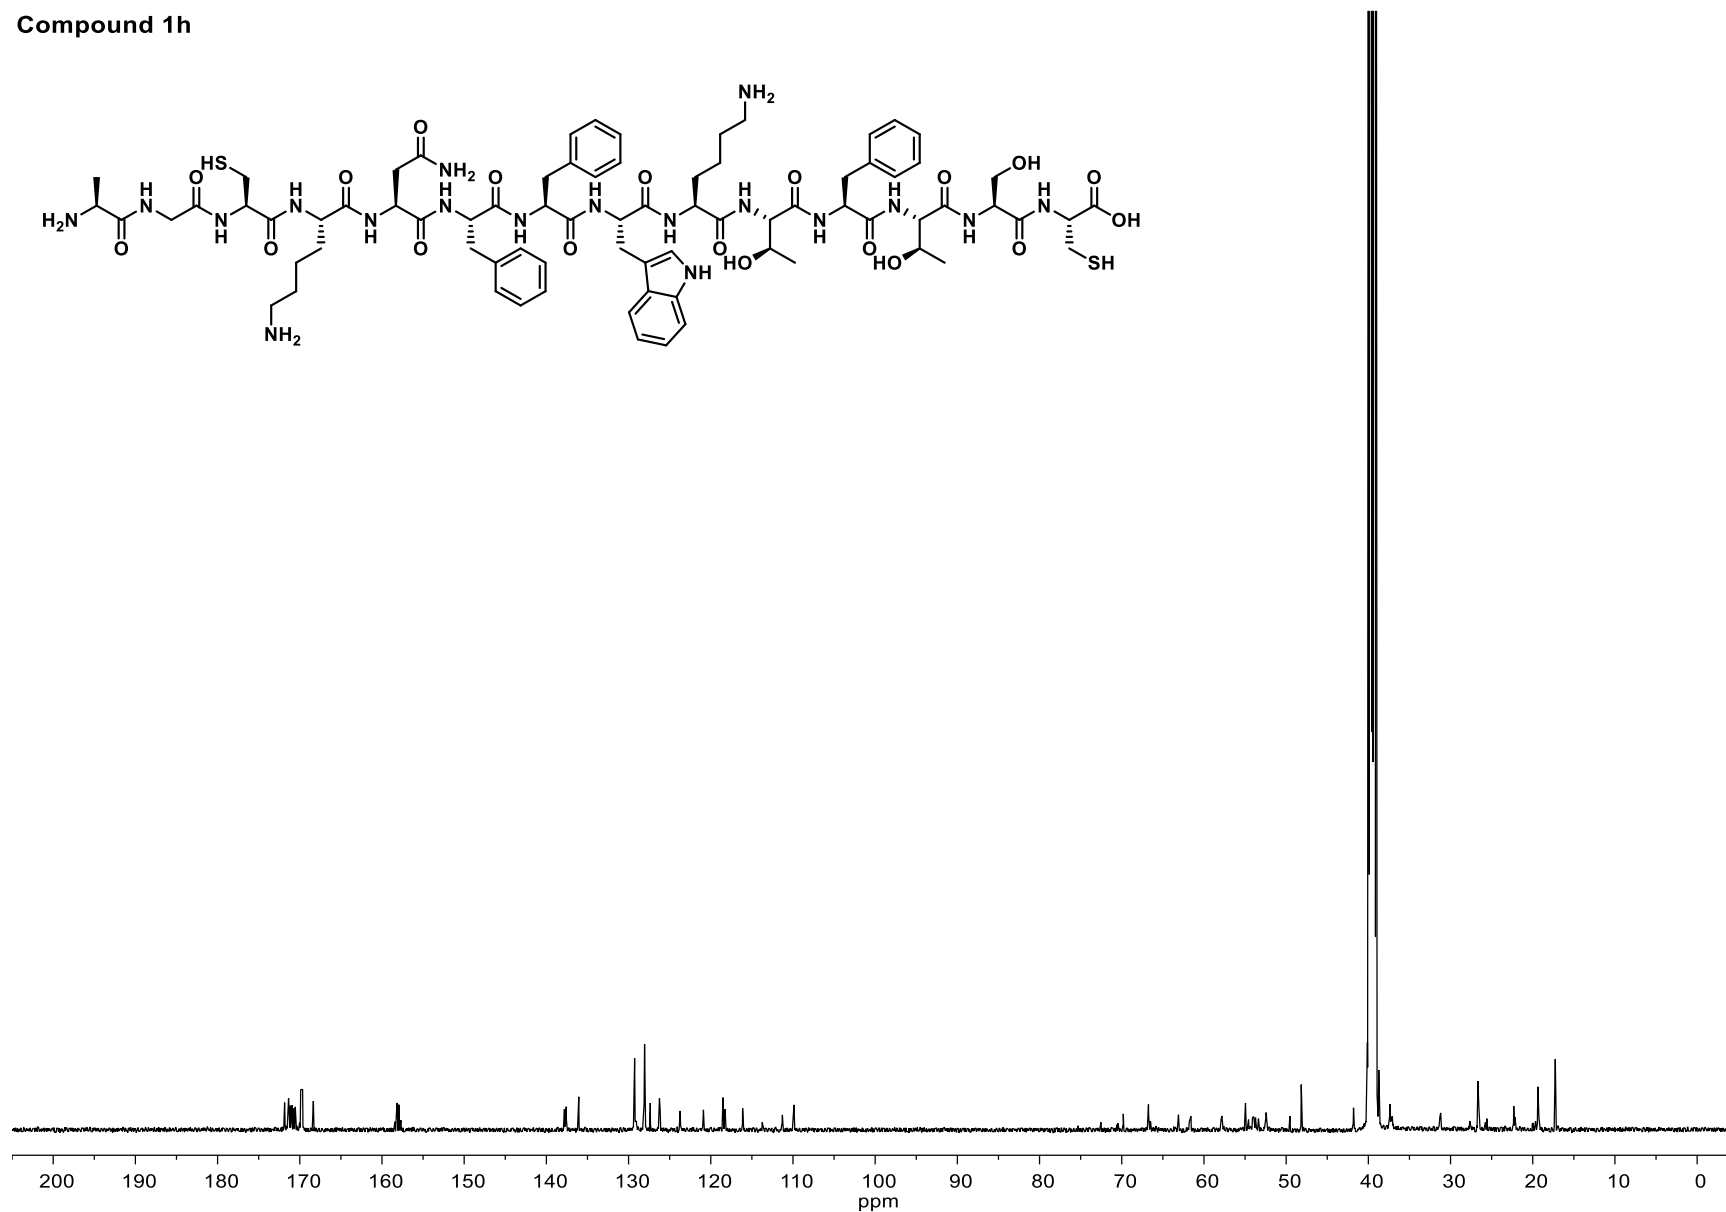

**1h** ( $^{13}\text{C}$ -NMR, DMSO, 126 MHz)

Compound 2a

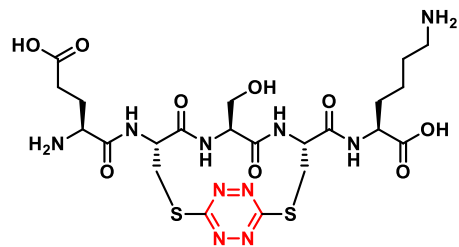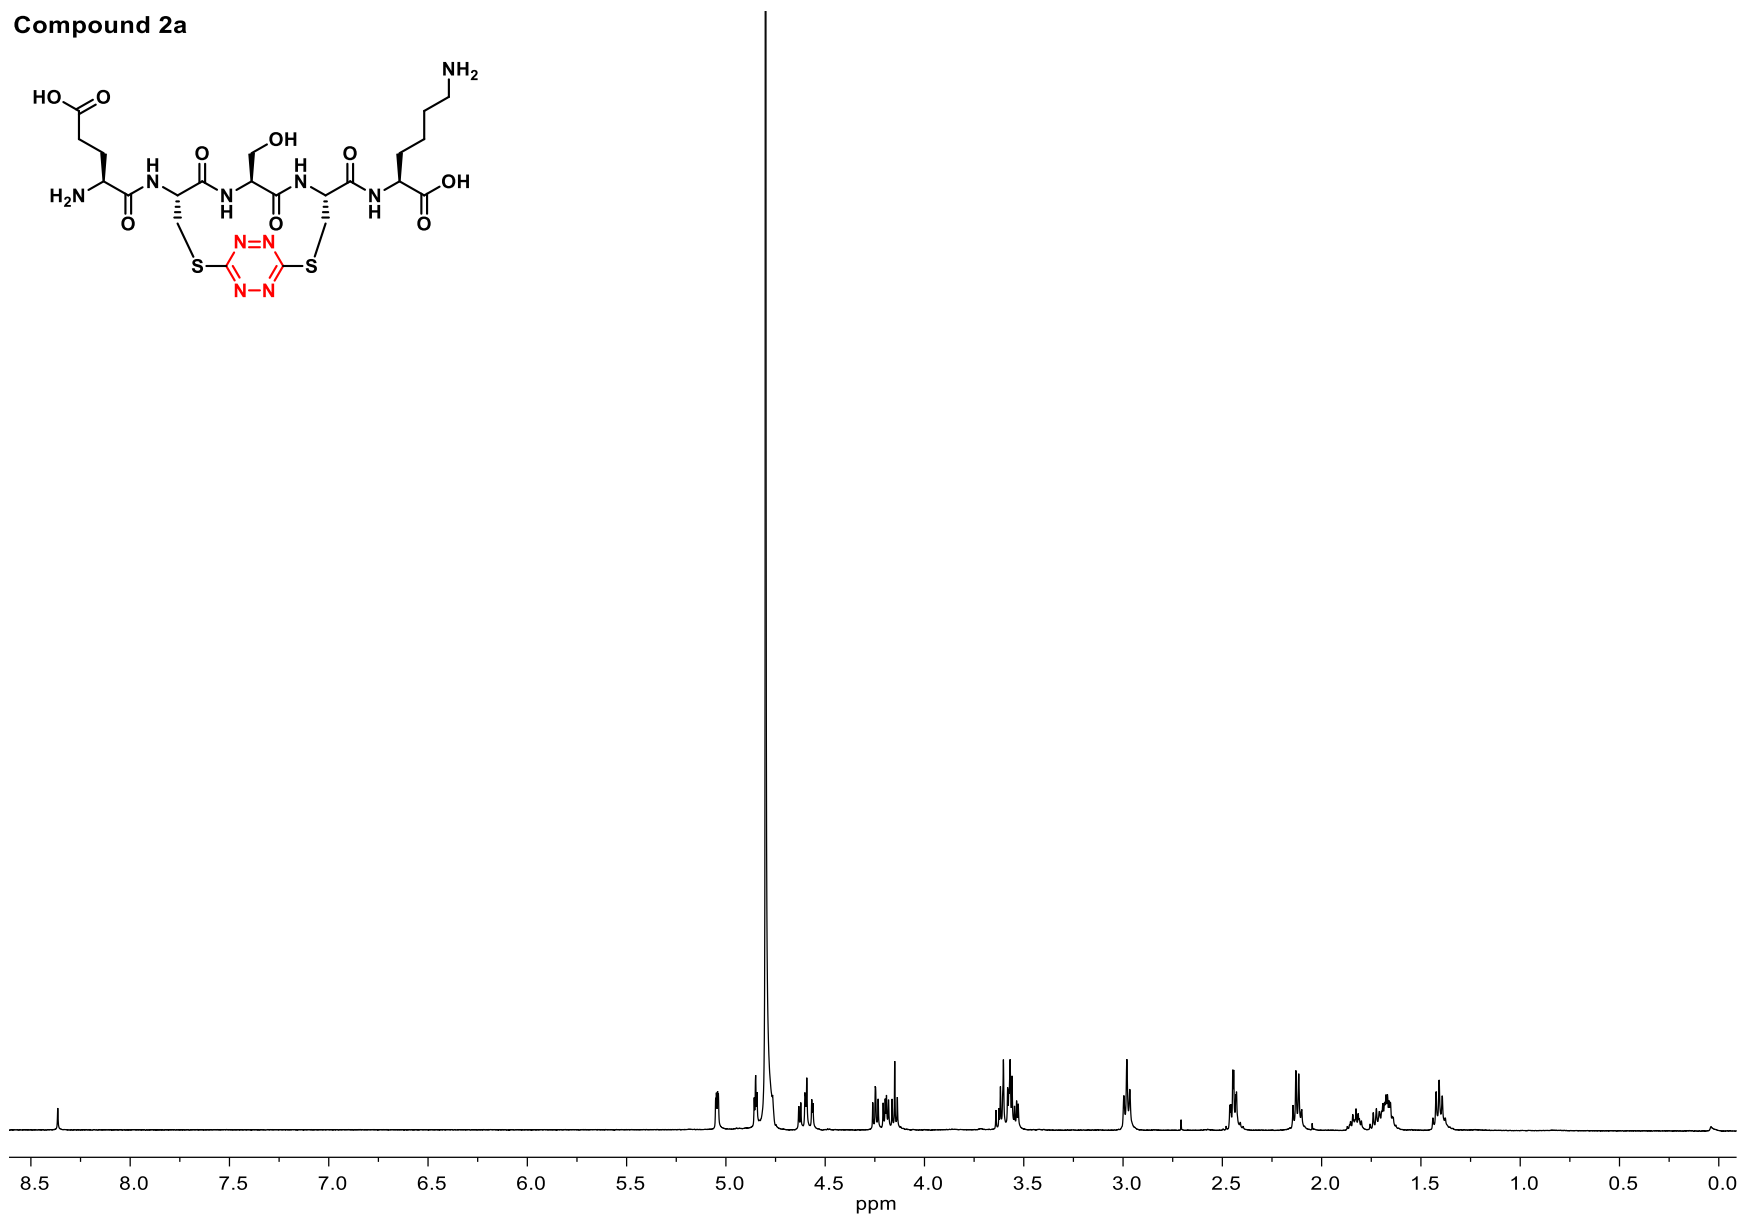

2a (<sup>1</sup>H-NMR, D<sub>2</sub>O, 500 MHz)

Compound 2a

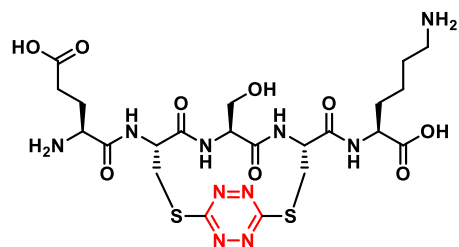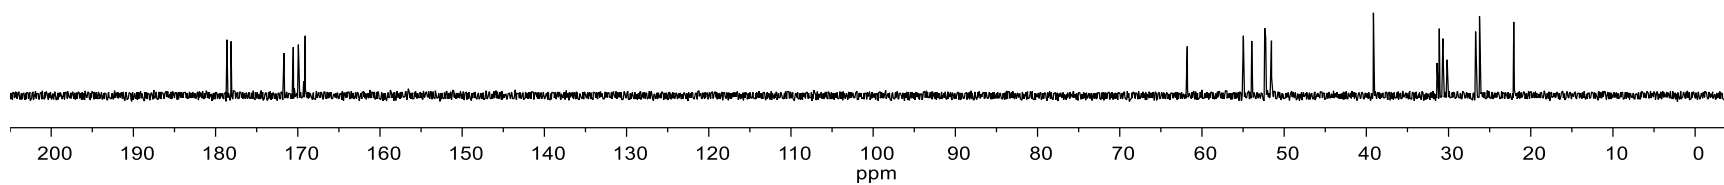

2a (<sup>13</sup>C-NMR, D<sub>2</sub>O, 126 MHz)

Compound 2a

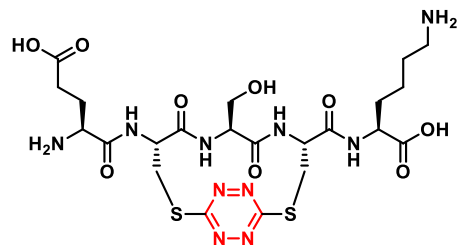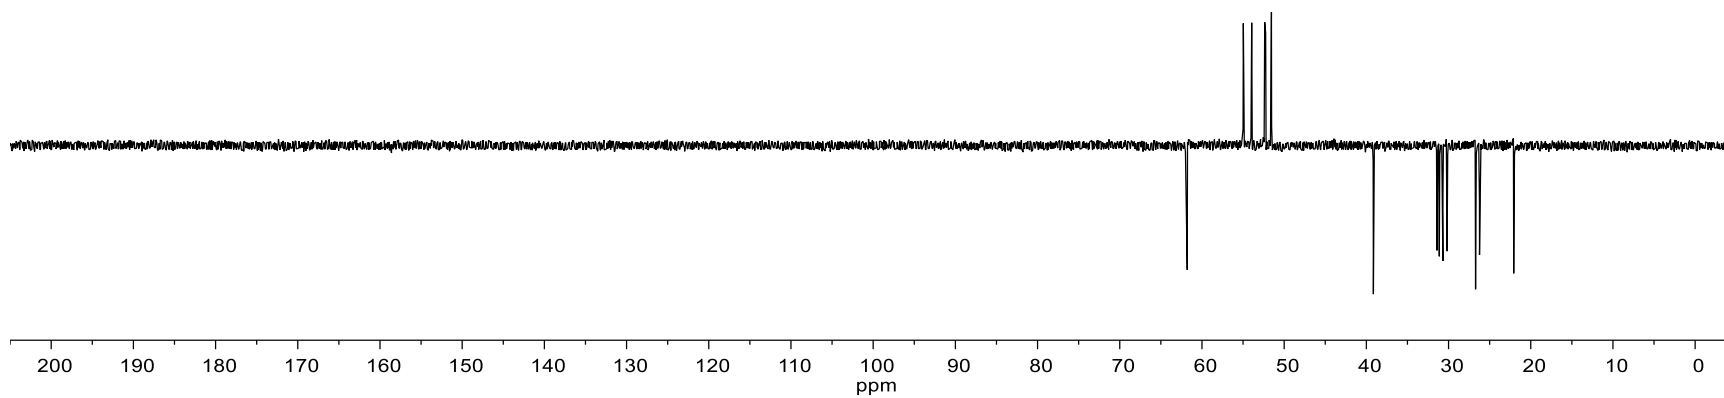

2a (DEPT135, D<sub>2</sub>O, 126 MHz)

Compound 2b

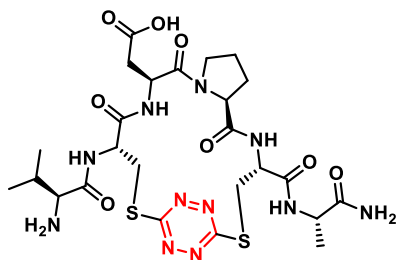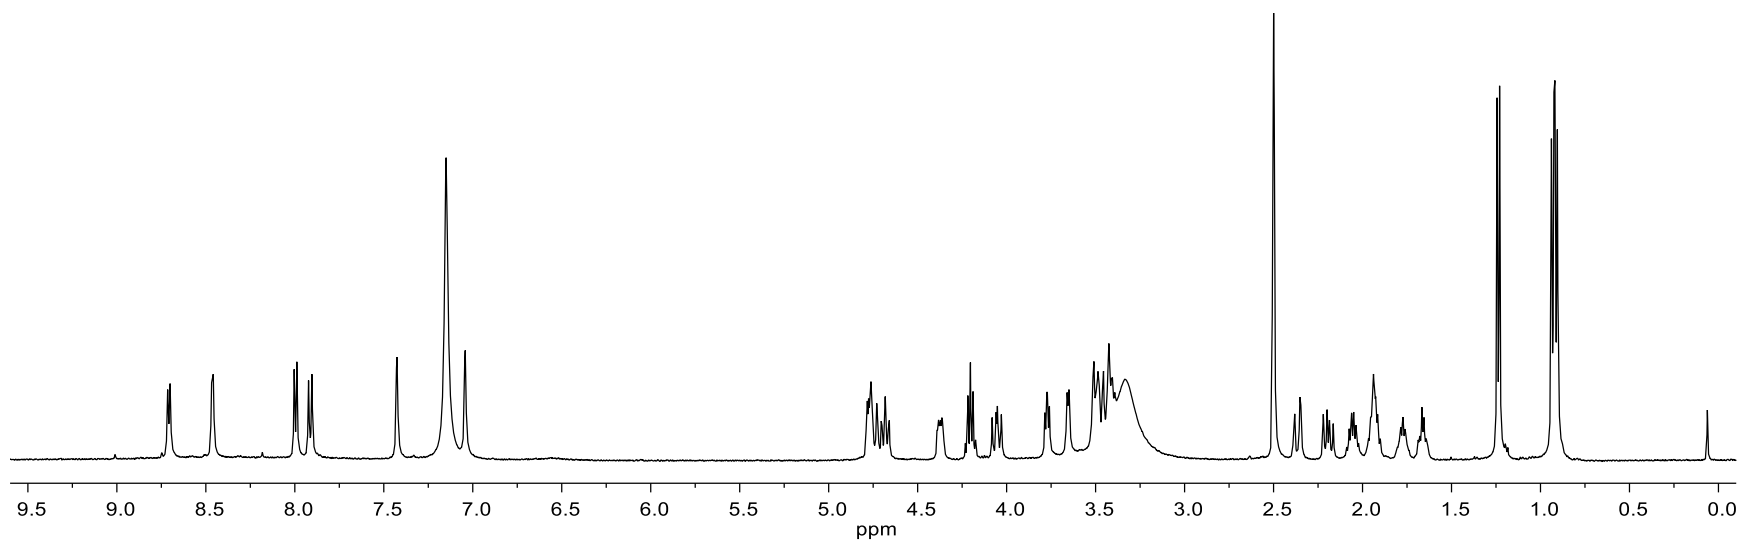

2b (<sup>1</sup>H-NMR, DMSO, 500 MHz)

Compound 2b

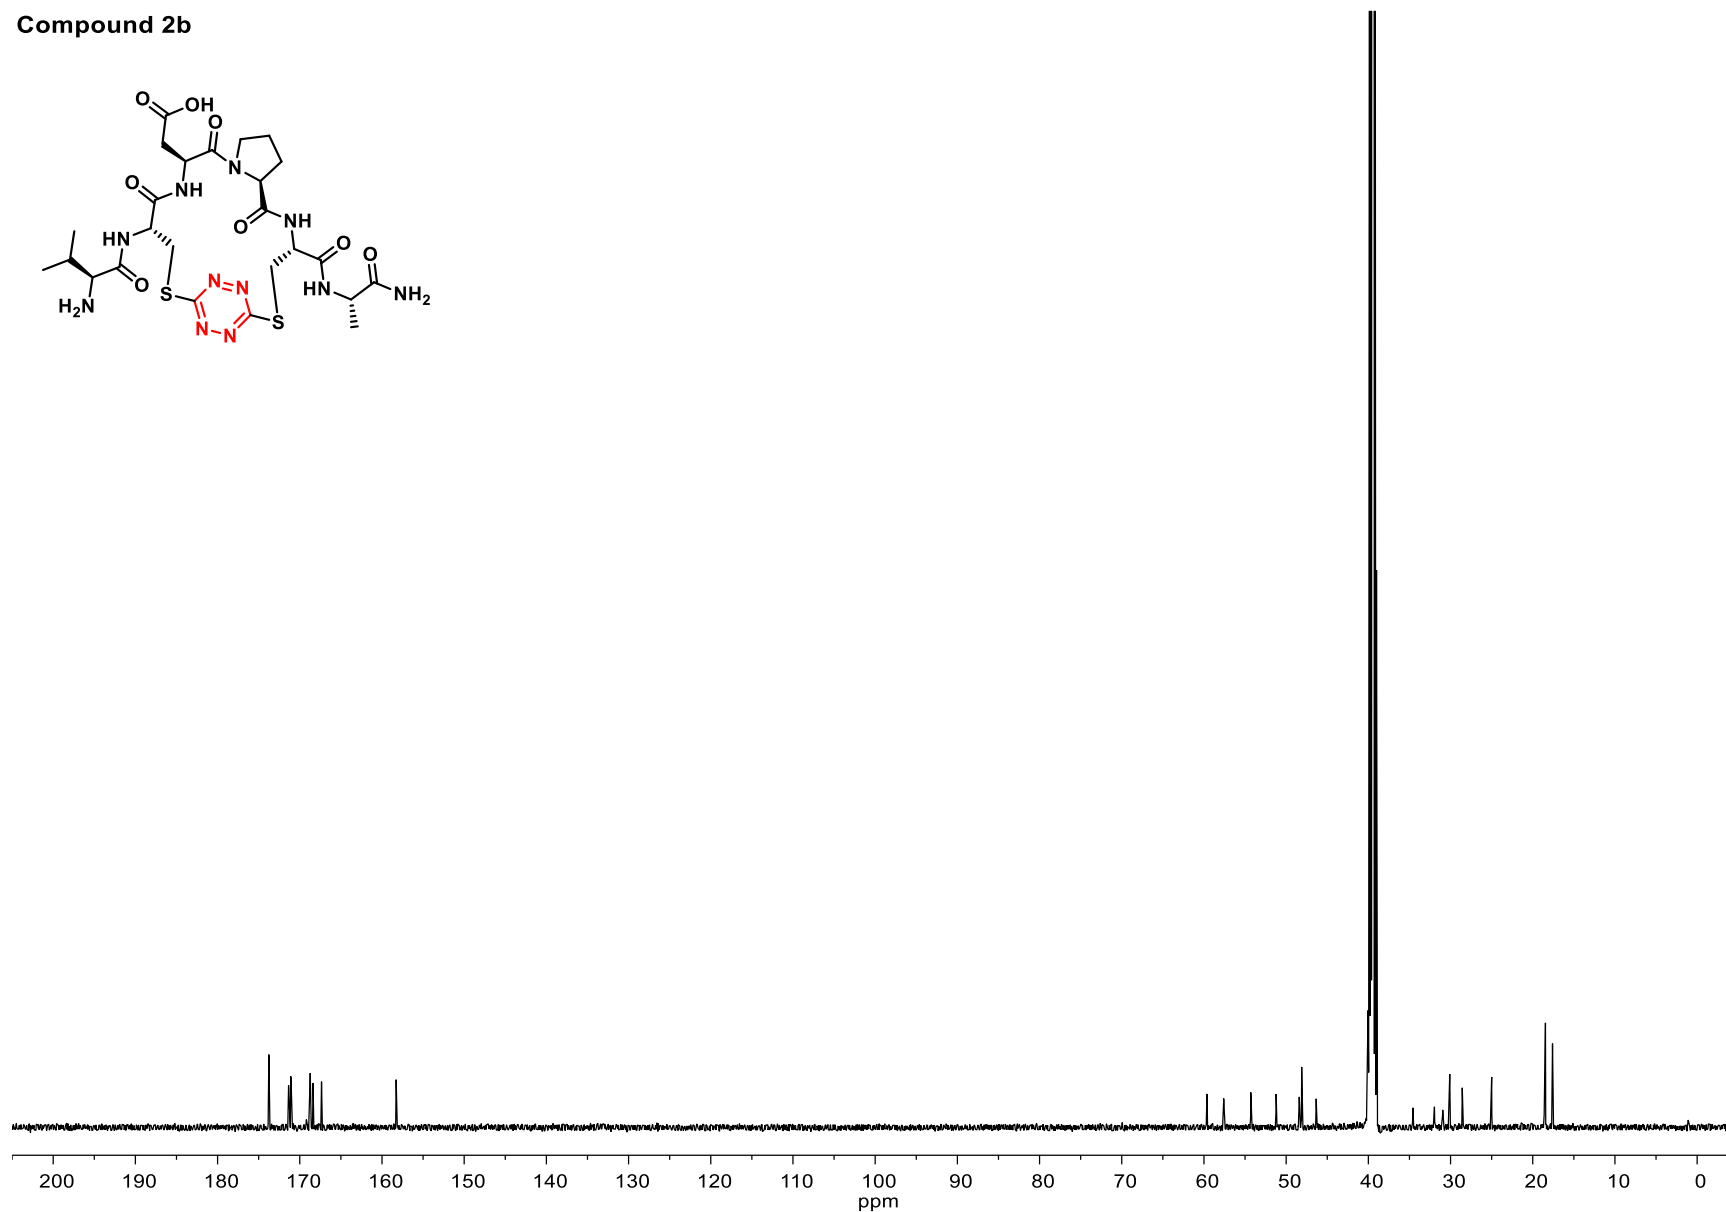

2b (<sup>13</sup>C-NMR, DMSO, 126 MHz)

Compound 2c

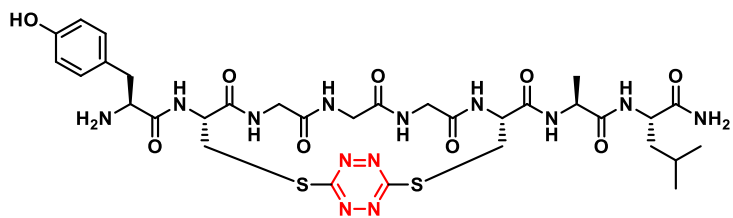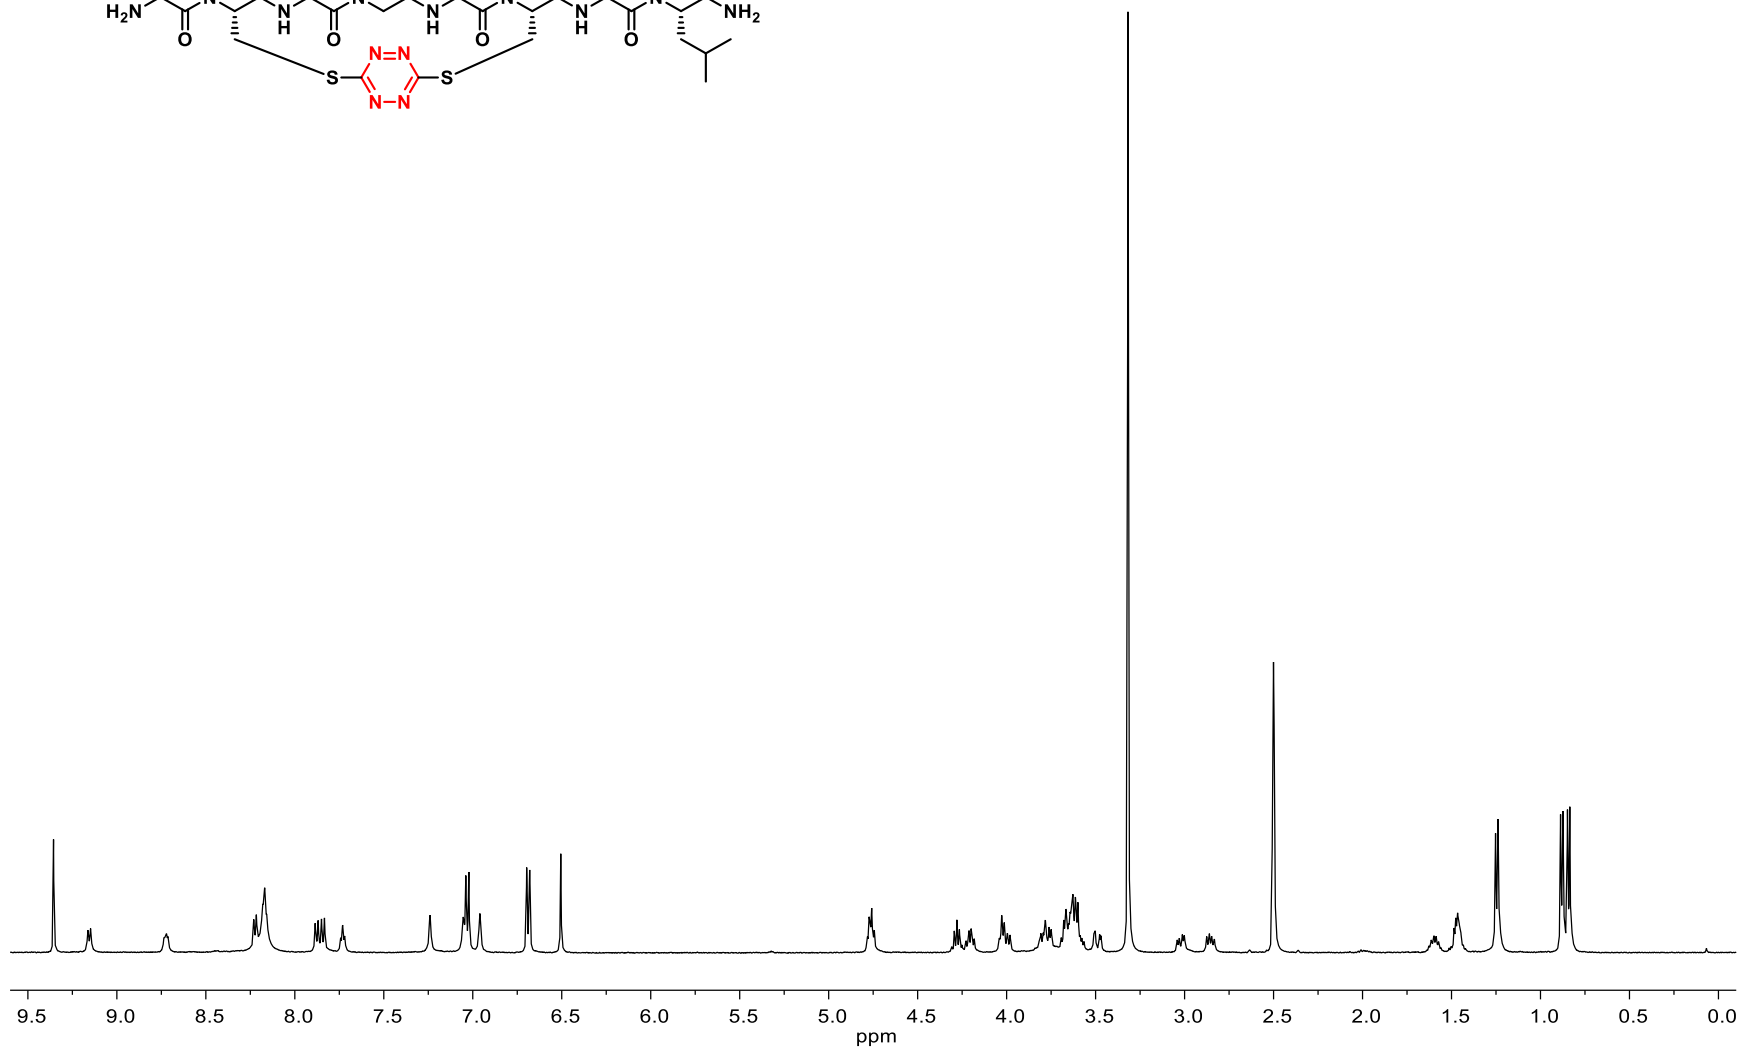

2c (<sup>1</sup>H-NMR, DMSO, 500 MHz)

Compound 2c

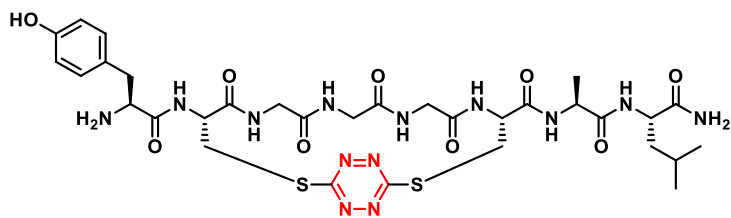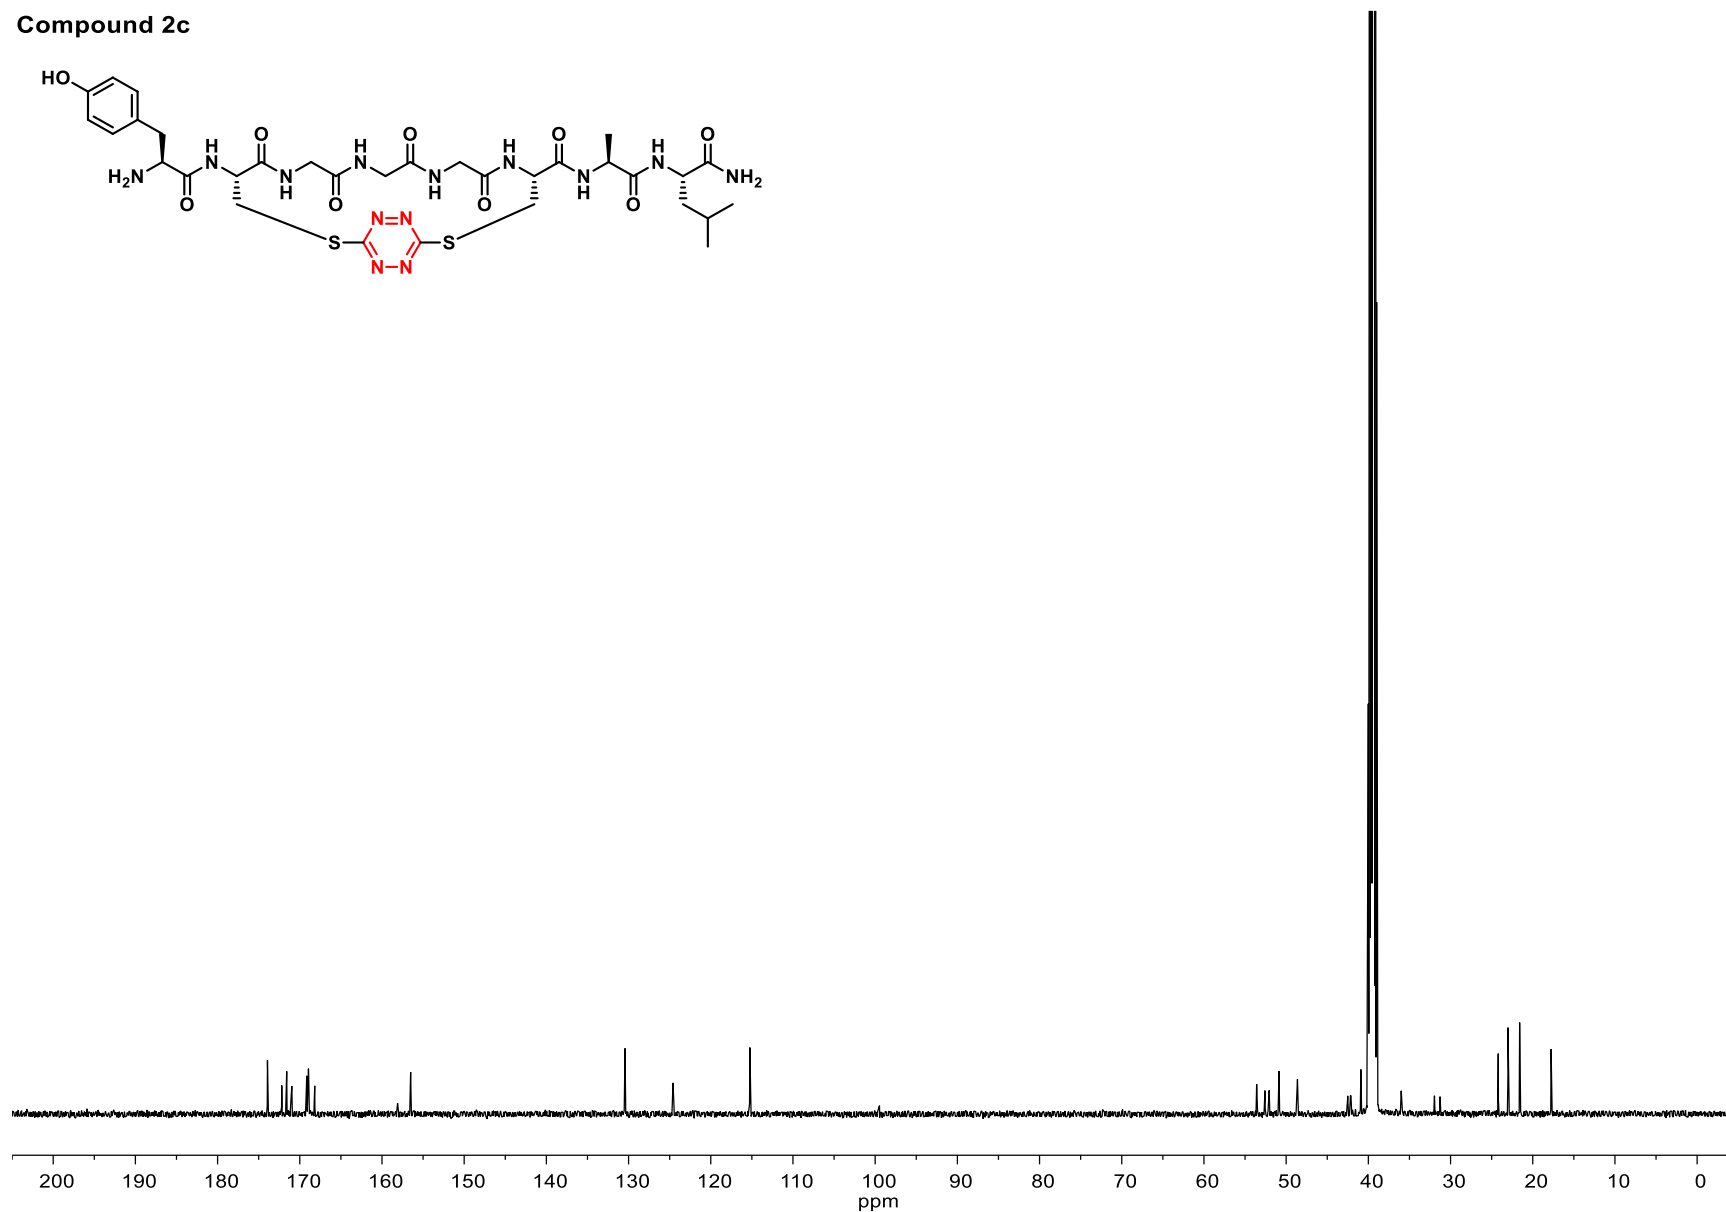

2c (<sup>13</sup>C-NMR, DMSO, 126 MHz)



Compound 2d

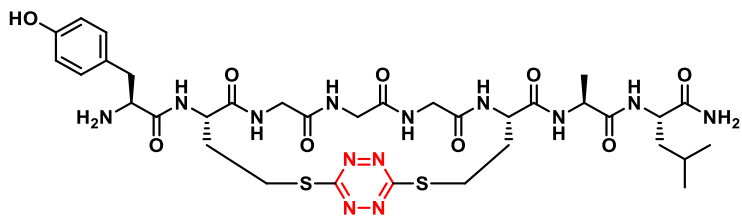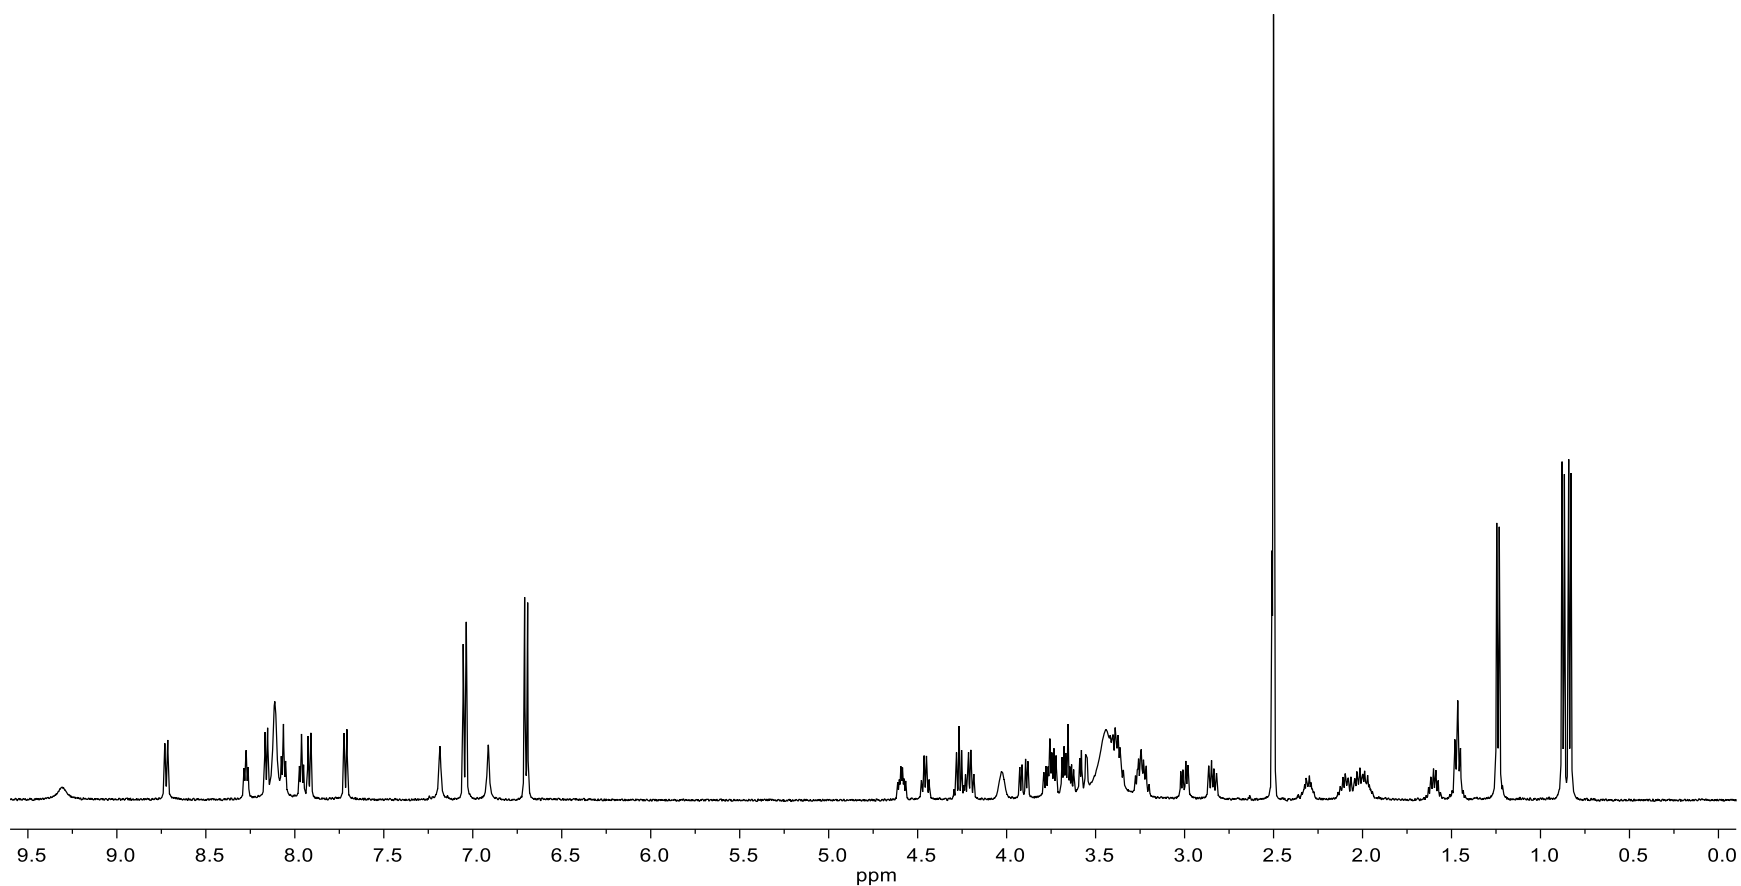

**2d** (<sup>1</sup>H-NMR, DMSO, 500 MHz)

Compound 2d

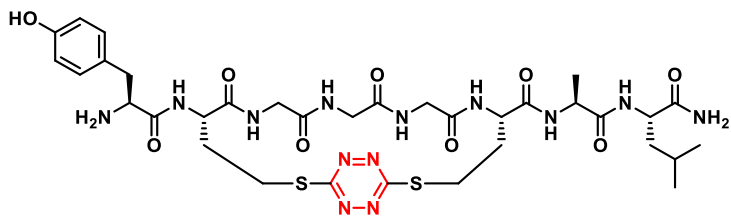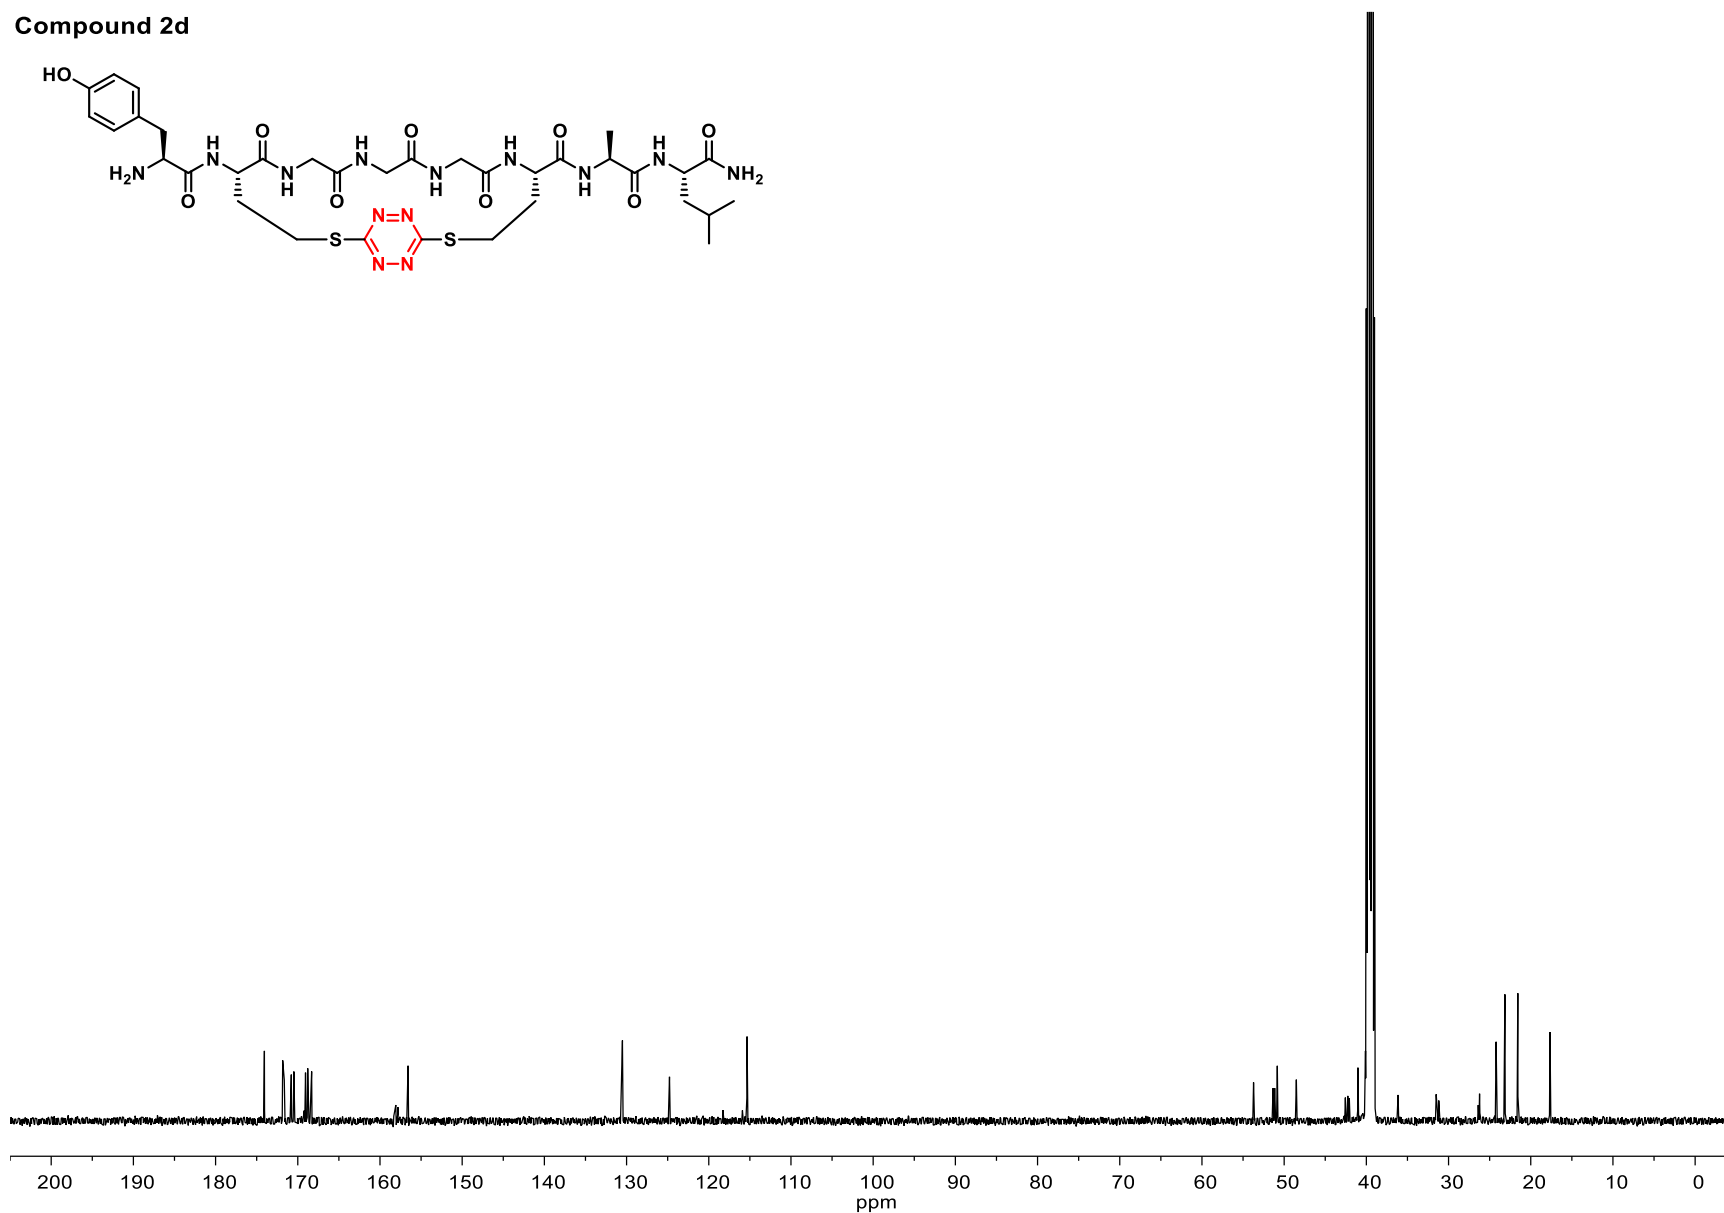

2d (<sup>13</sup>C-NMR, DMSO, 126 MHz)

Compound 2e

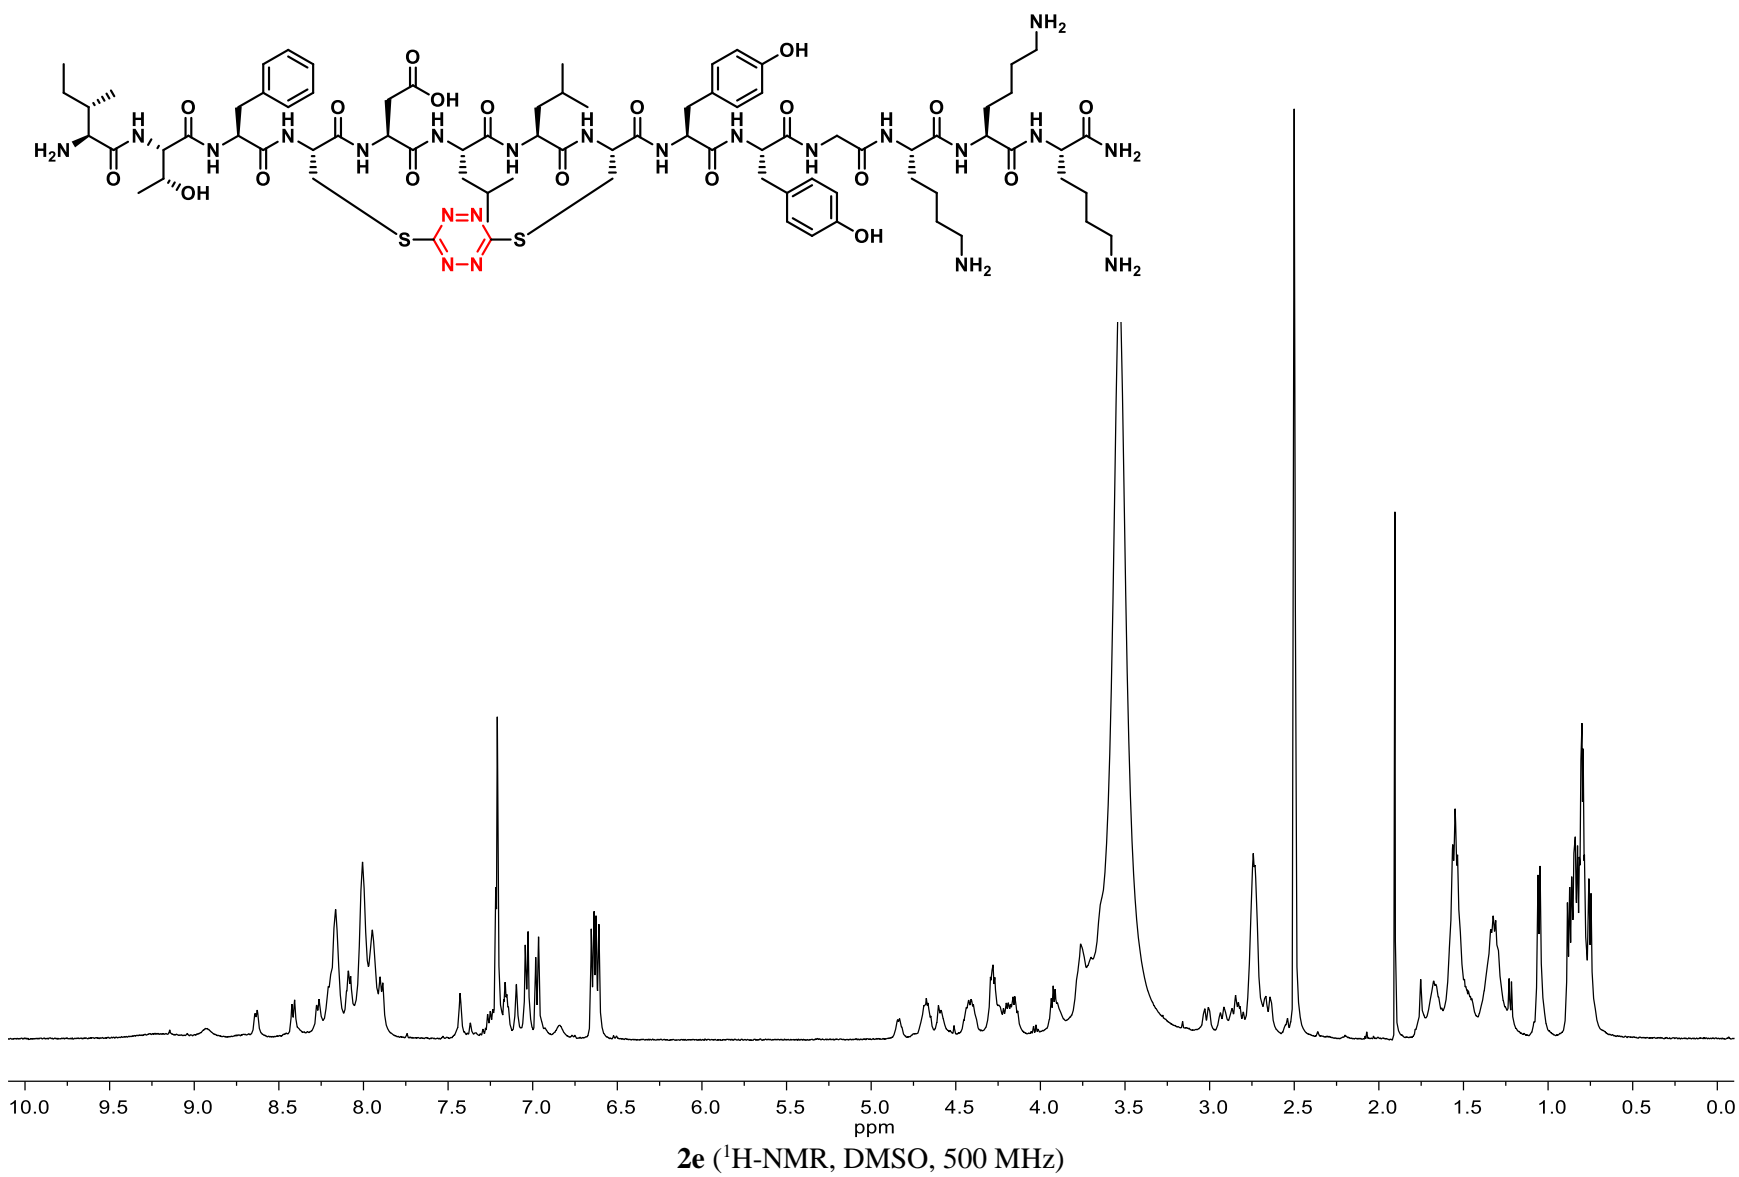

Compound 2e

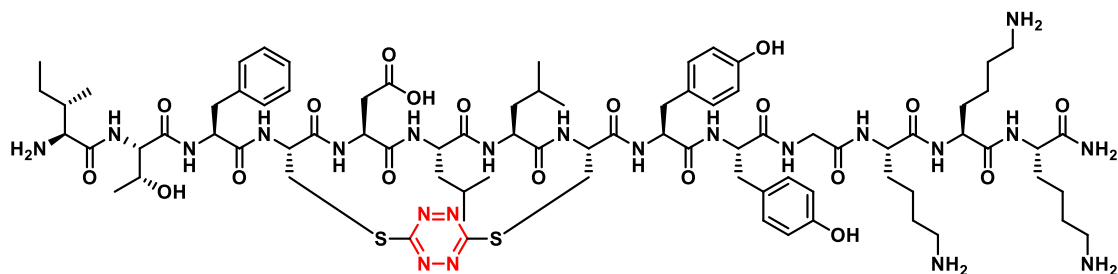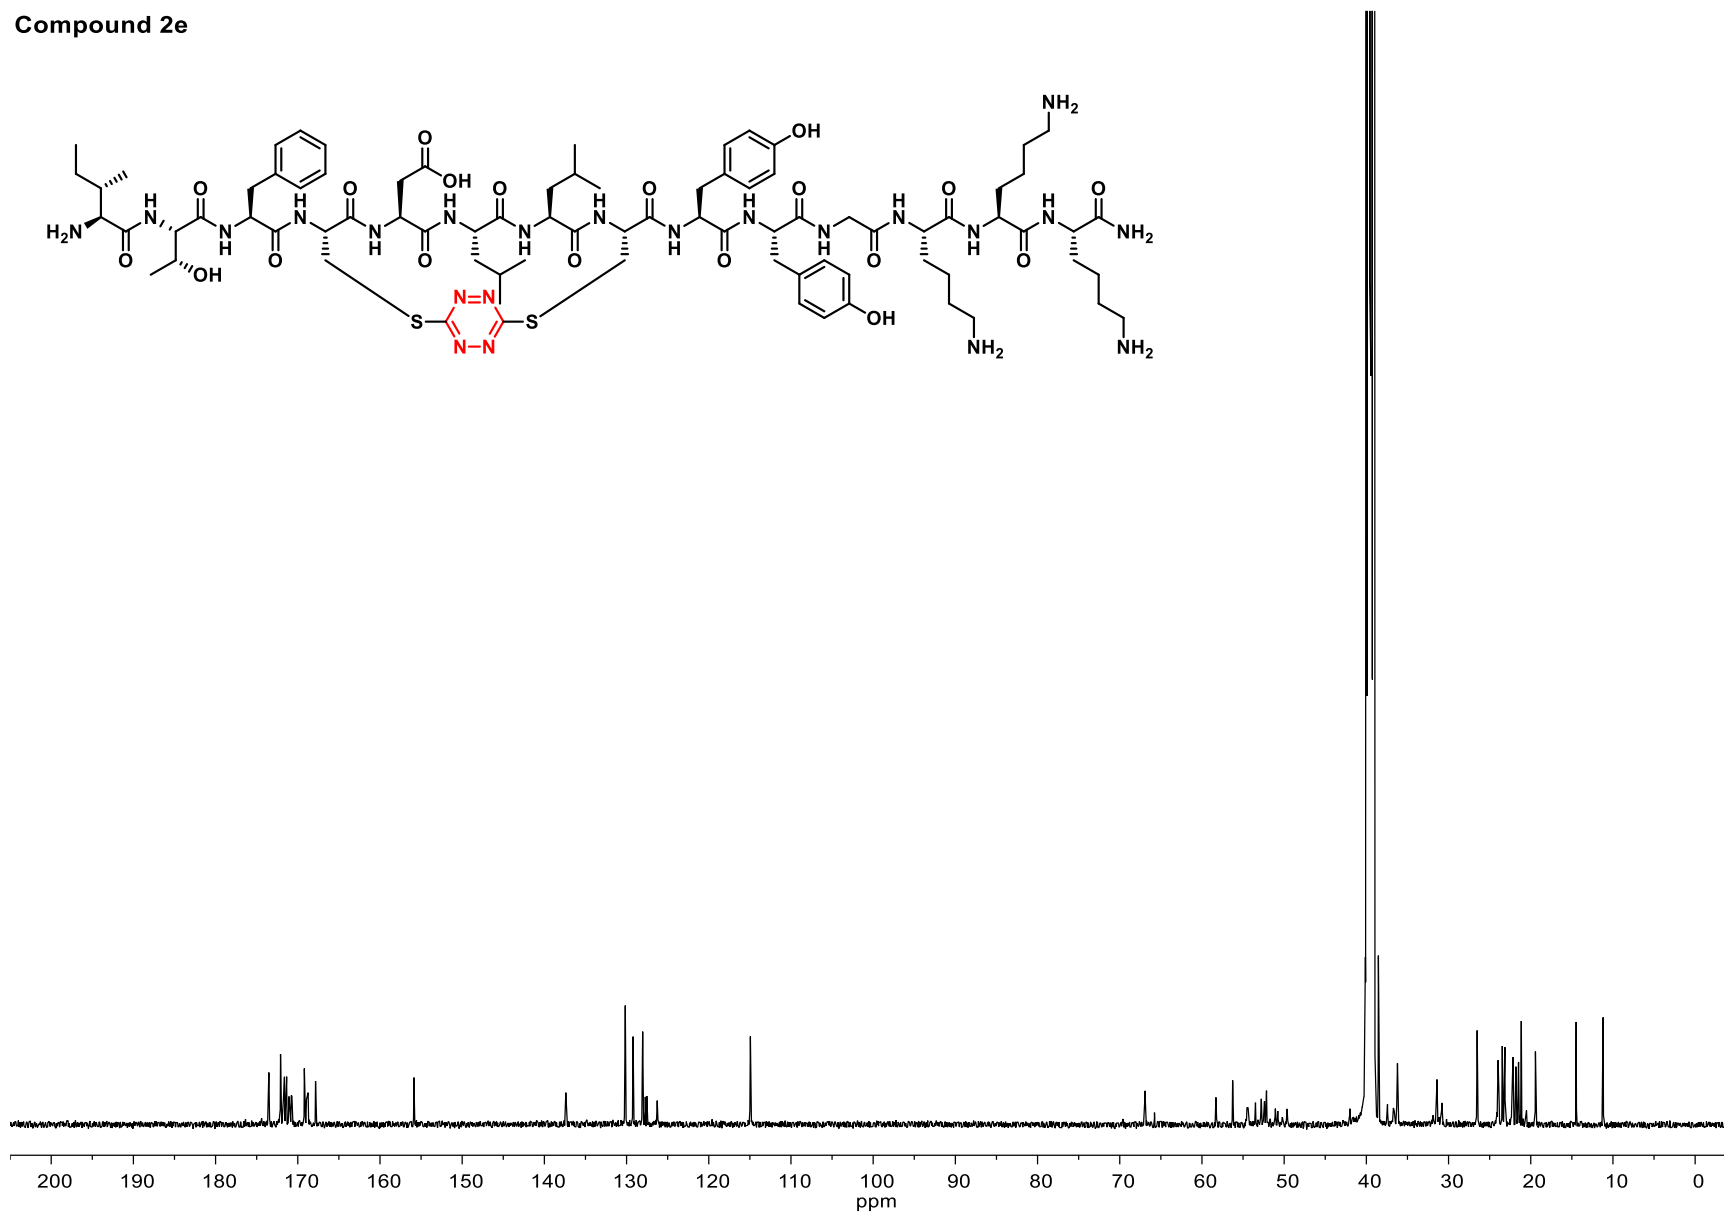

2e ( $^{13}\text{C}$ -NMR, DMSO, 126 MHz)

Compound 2f

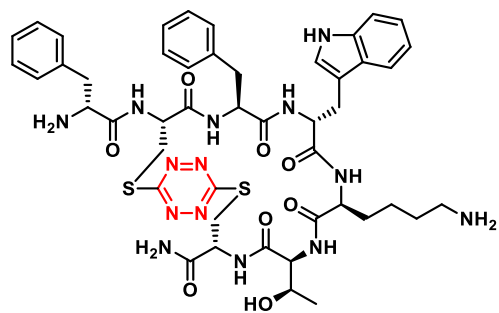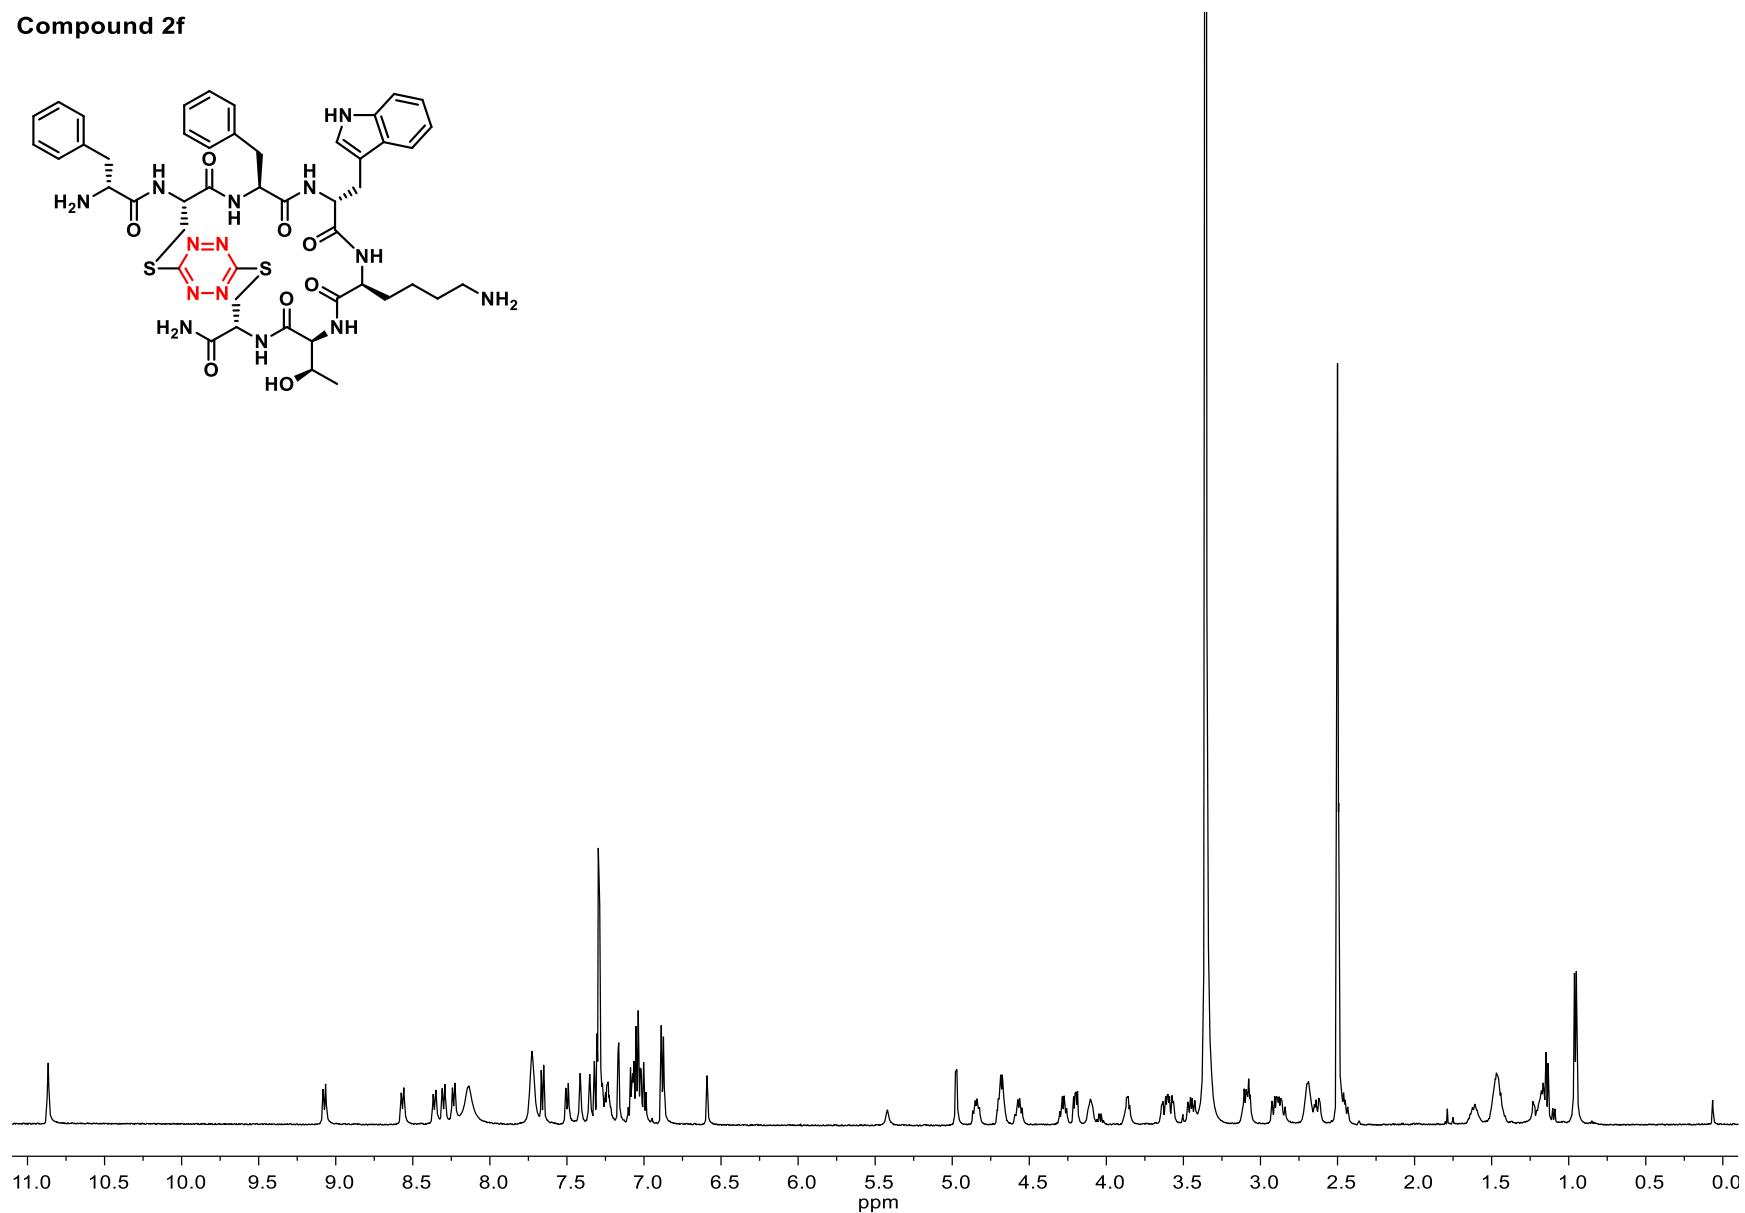

2f (<sup>1</sup>H-NMR, DMSO, 500 MHz)



Compound 2g

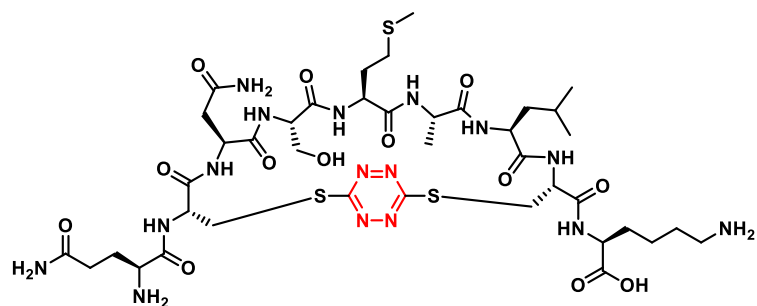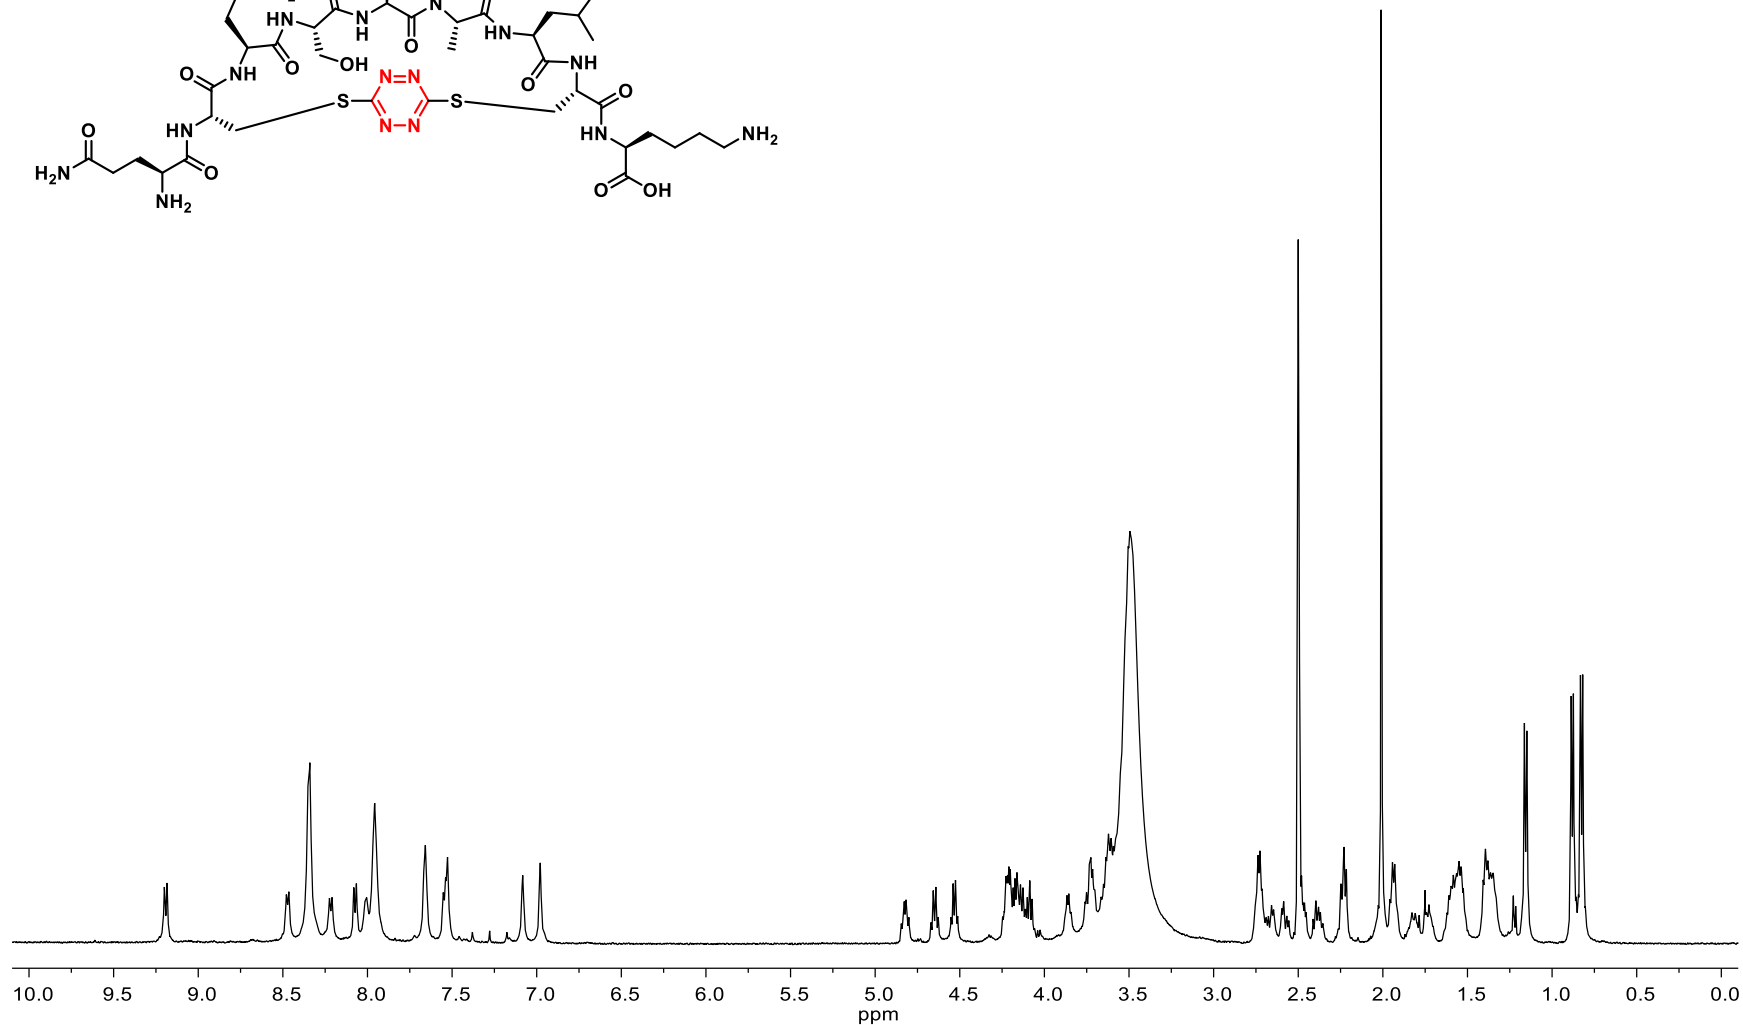

2g (<sup>1</sup>H-NMR, DMSO, 500 MHz)

Compound 2g

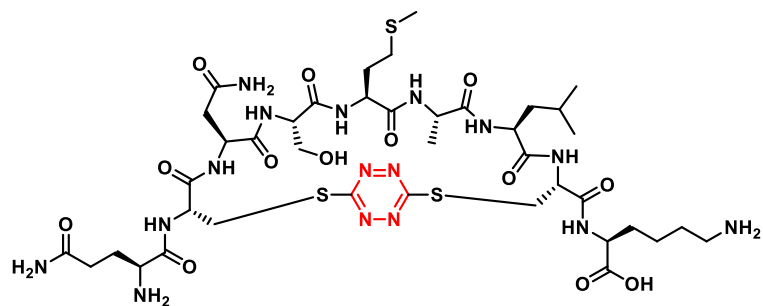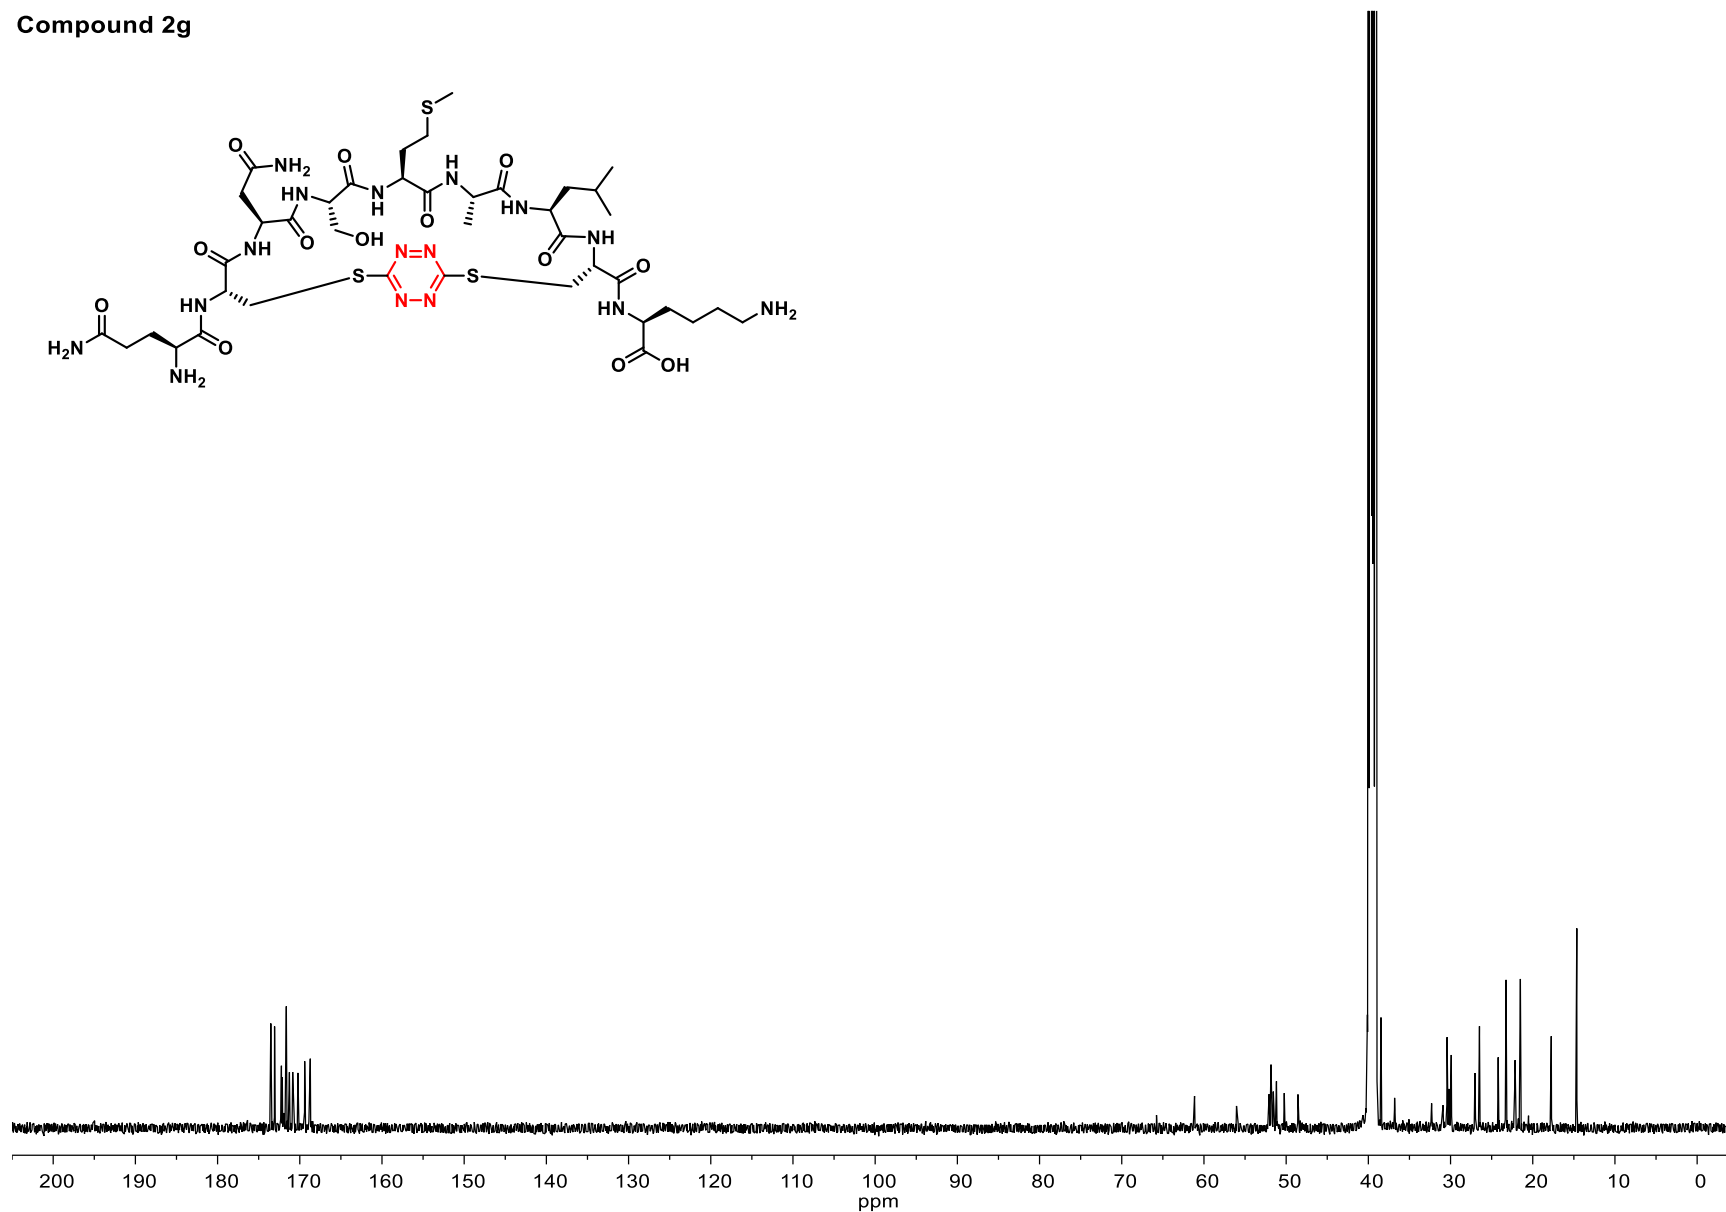

2g (<sup>13</sup>C-NMR, DMSO, 126 MHz)



Compound 2h

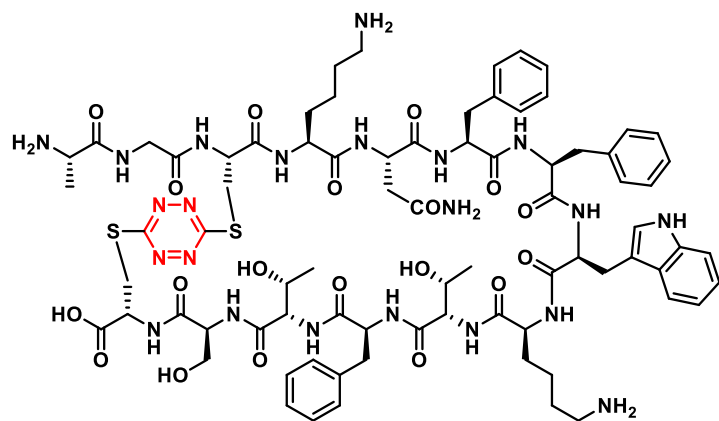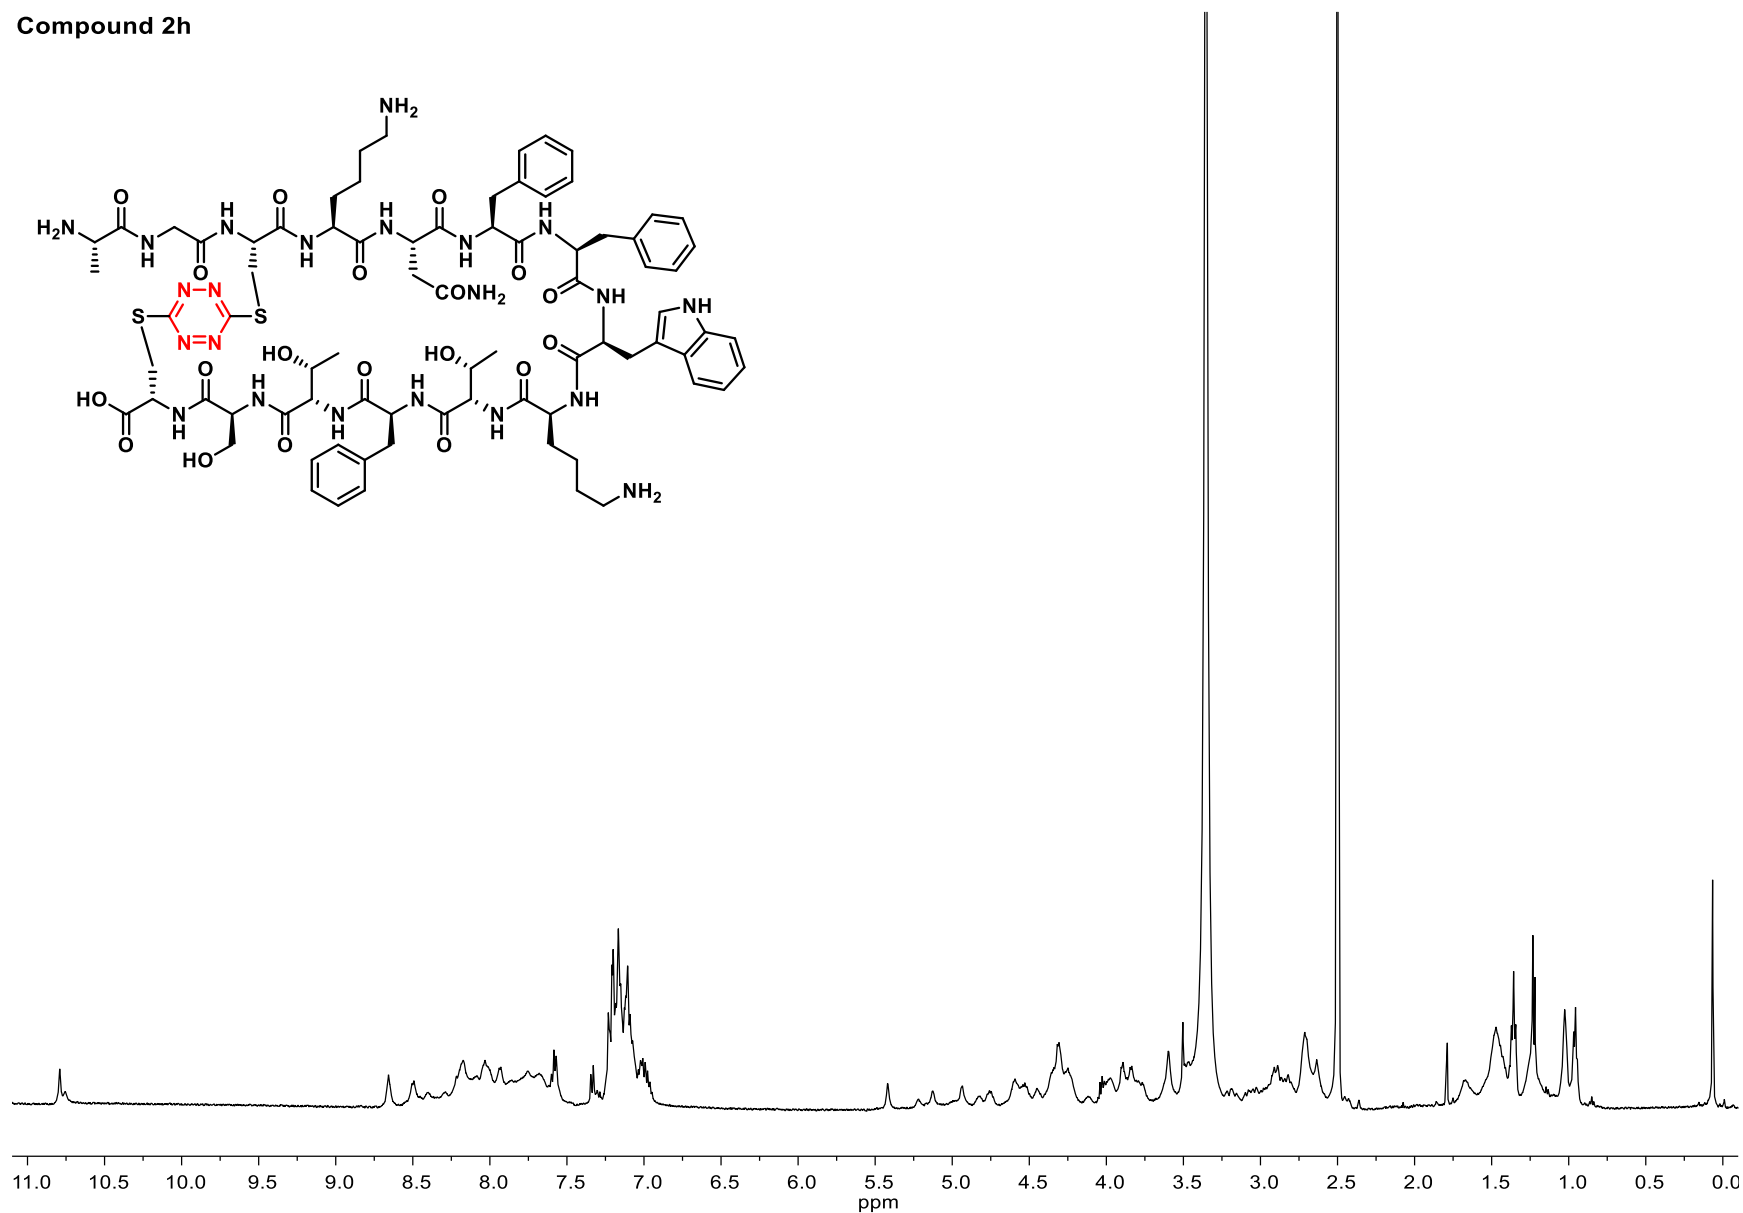

2h (<sup>1</sup>H-NMR, DMSO, 500 MHz)

Compound 2h

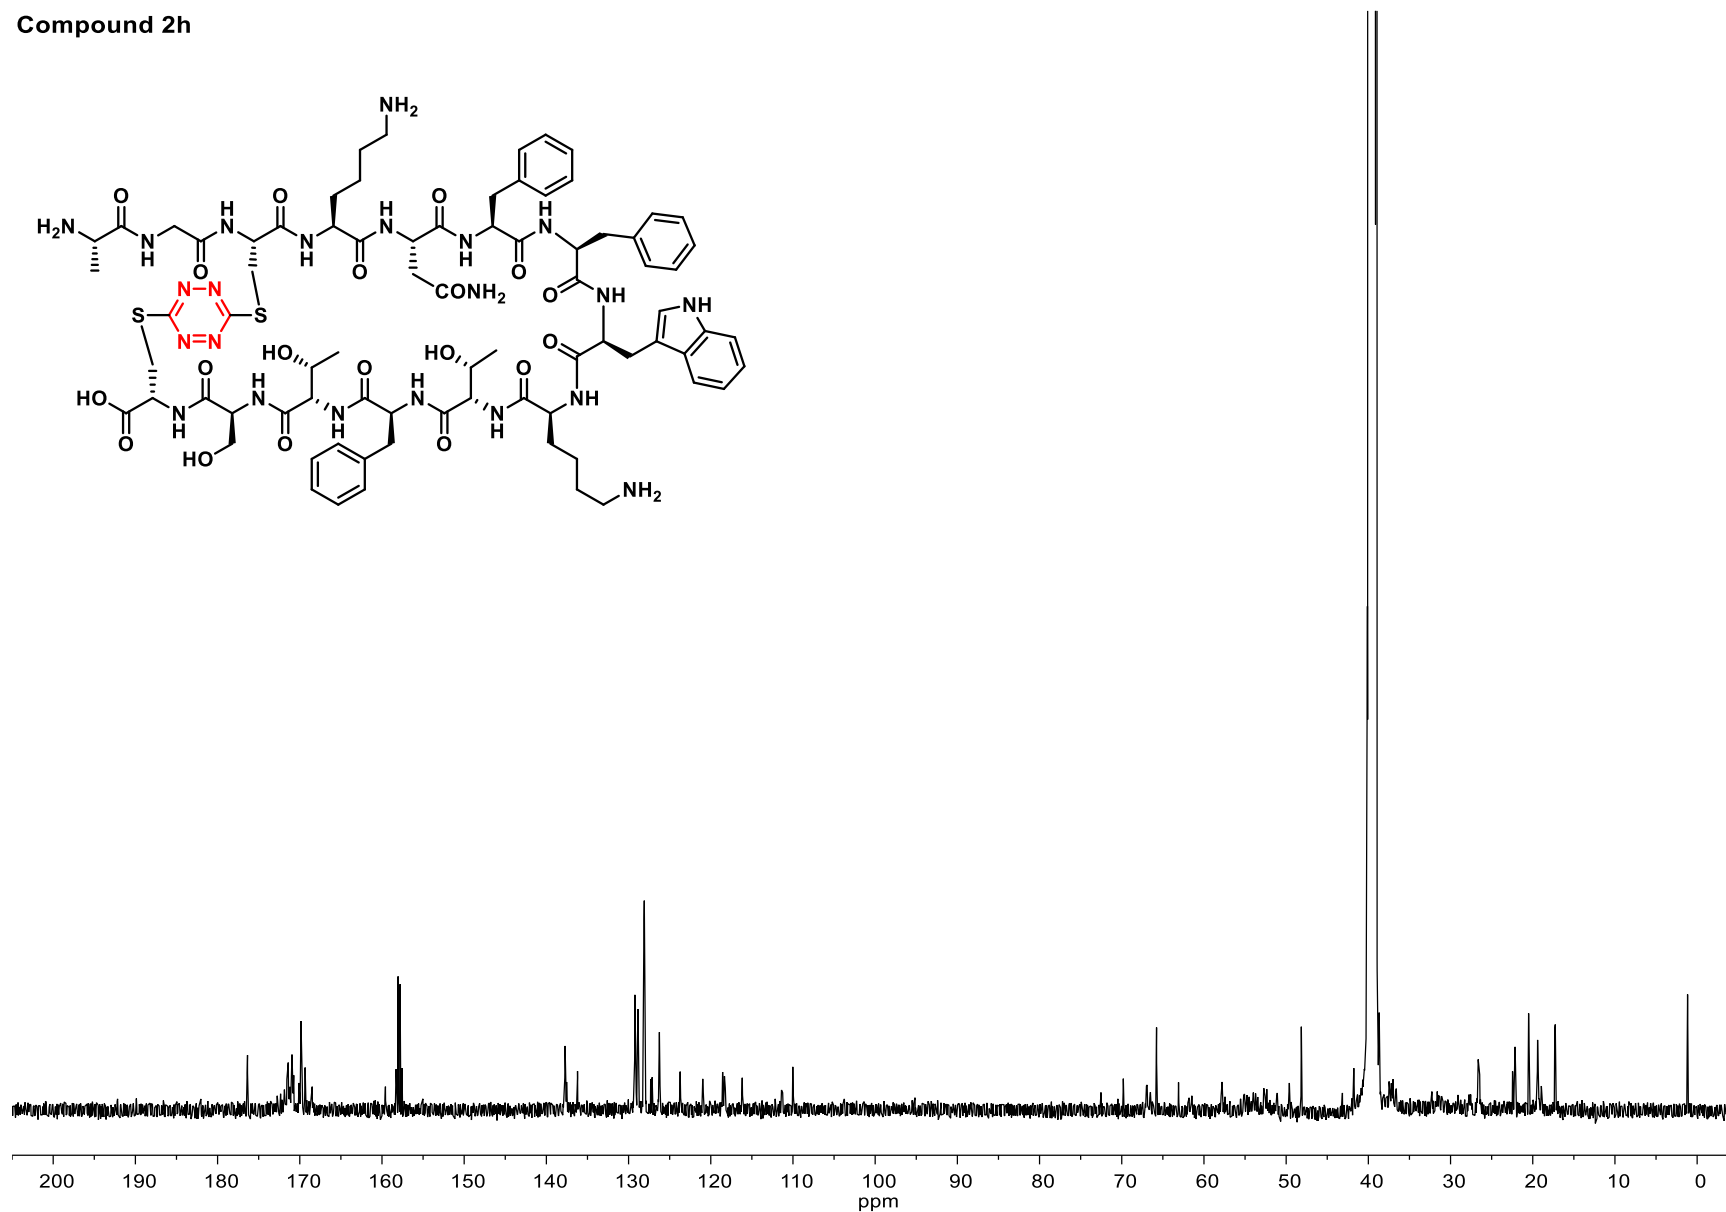

2h (<sup>13</sup>C-NMR, DMSO, 126 MHz)

Compound 3a

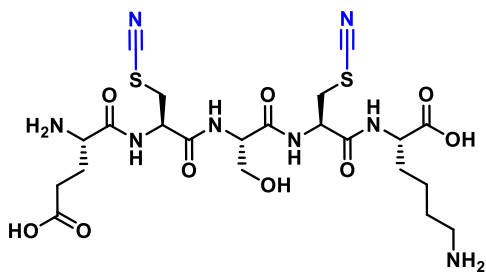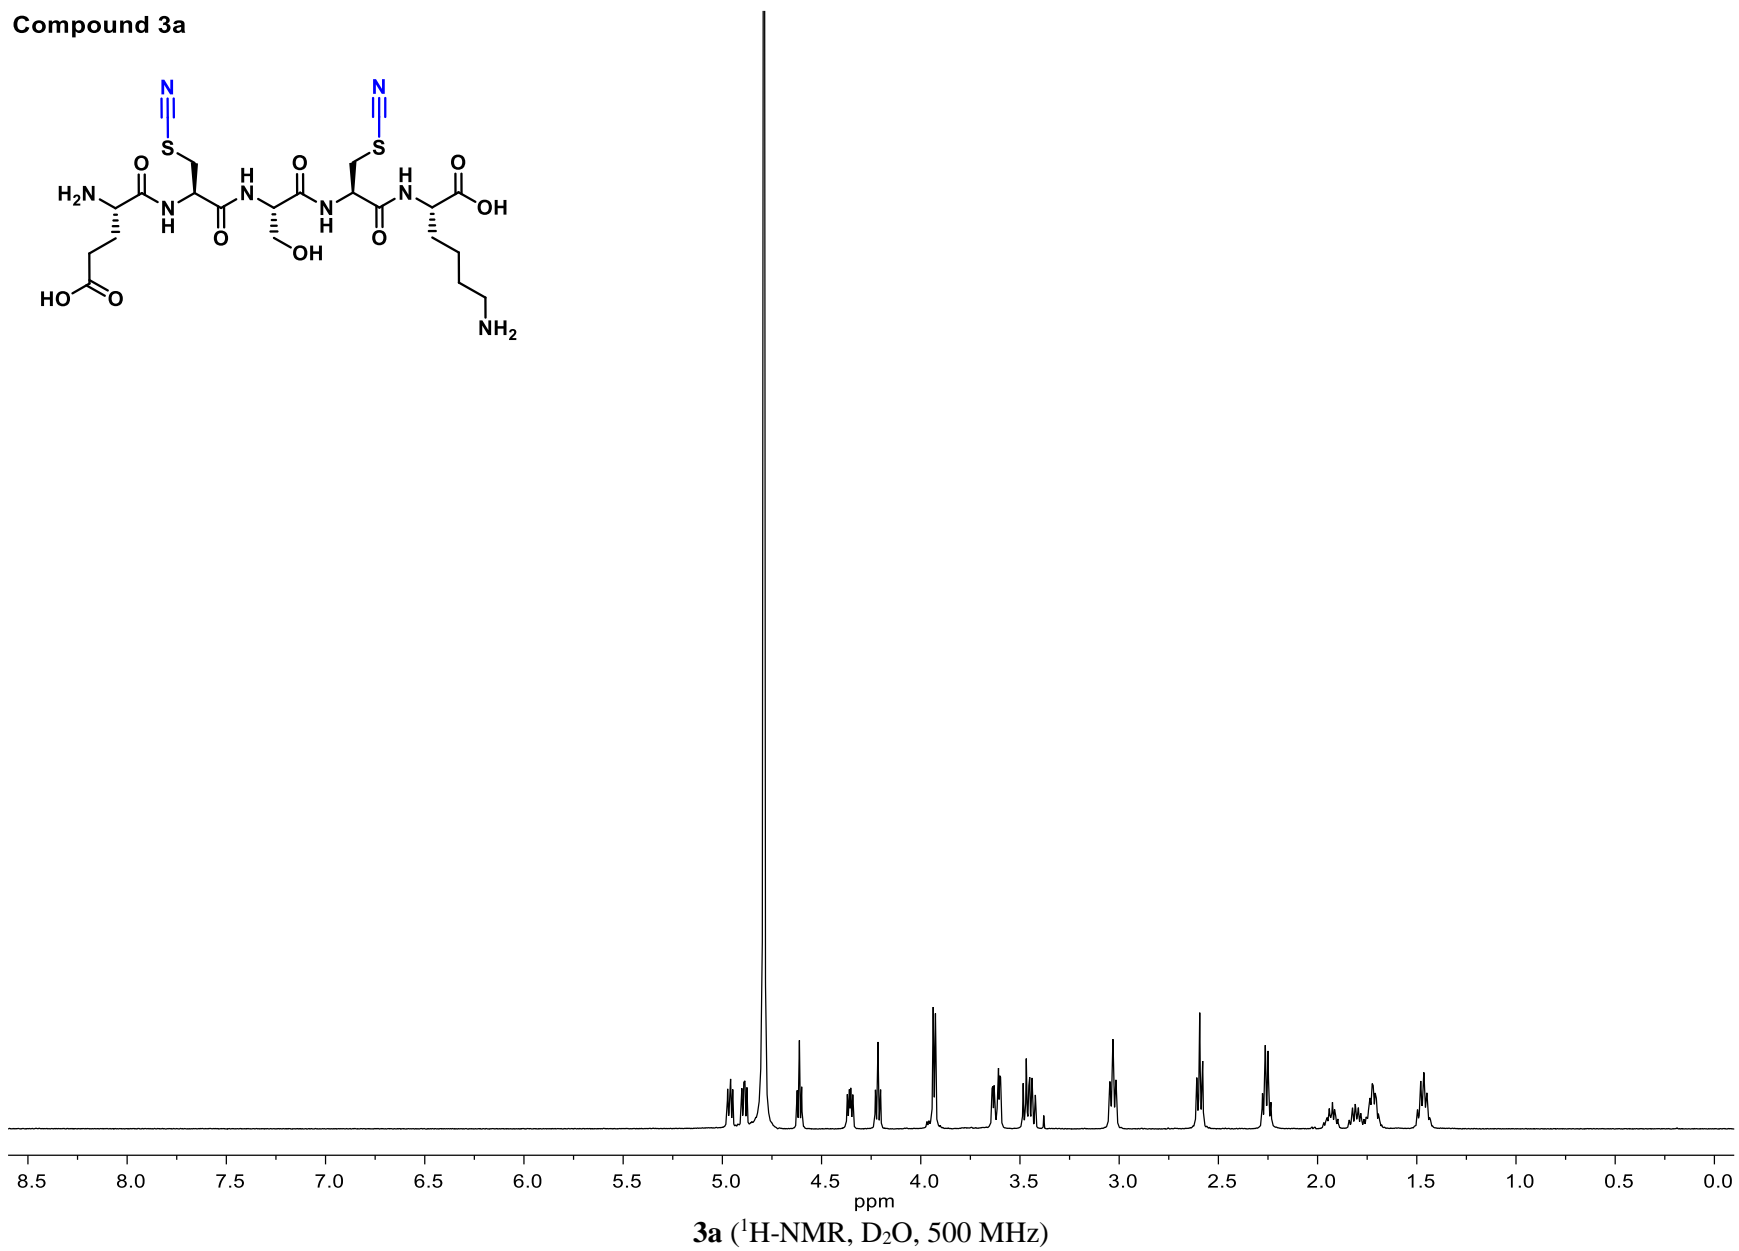

Compound 3a

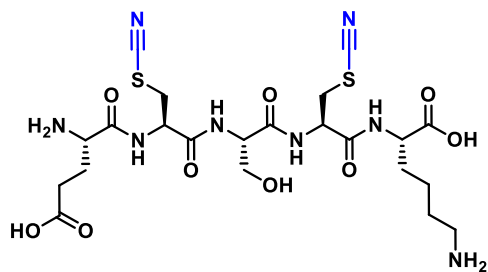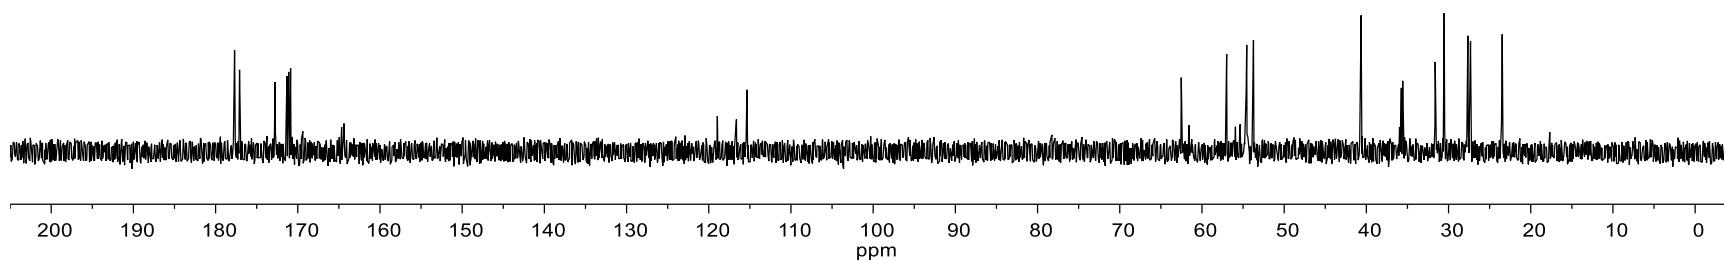

3a (<sup>13</sup>C-NMR, D<sub>2</sub>O, 126 MHz)

Compound 3b

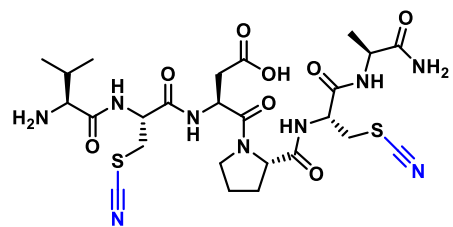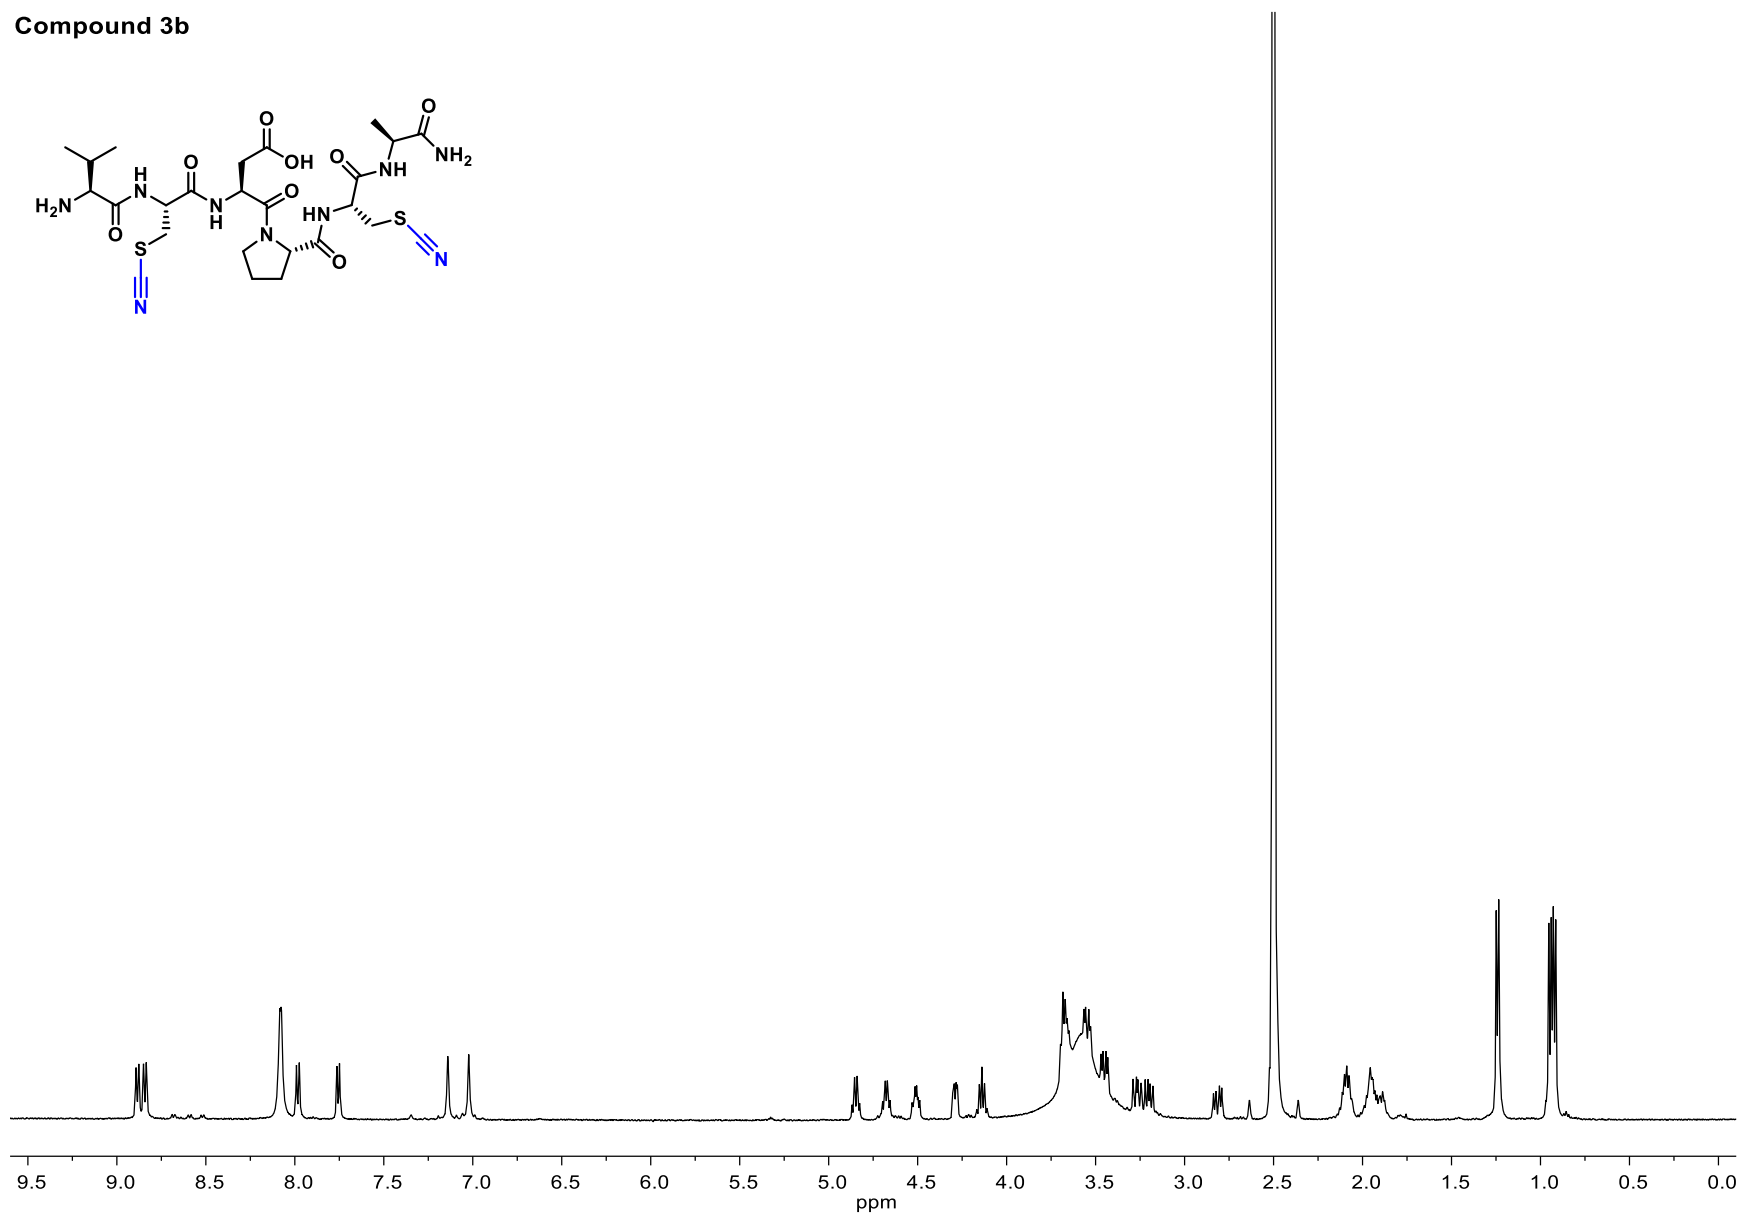

**3b** (<sup>1</sup>H-NMR, DMSO, 500 MHz)

Compound 3b

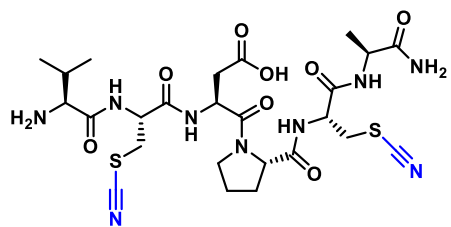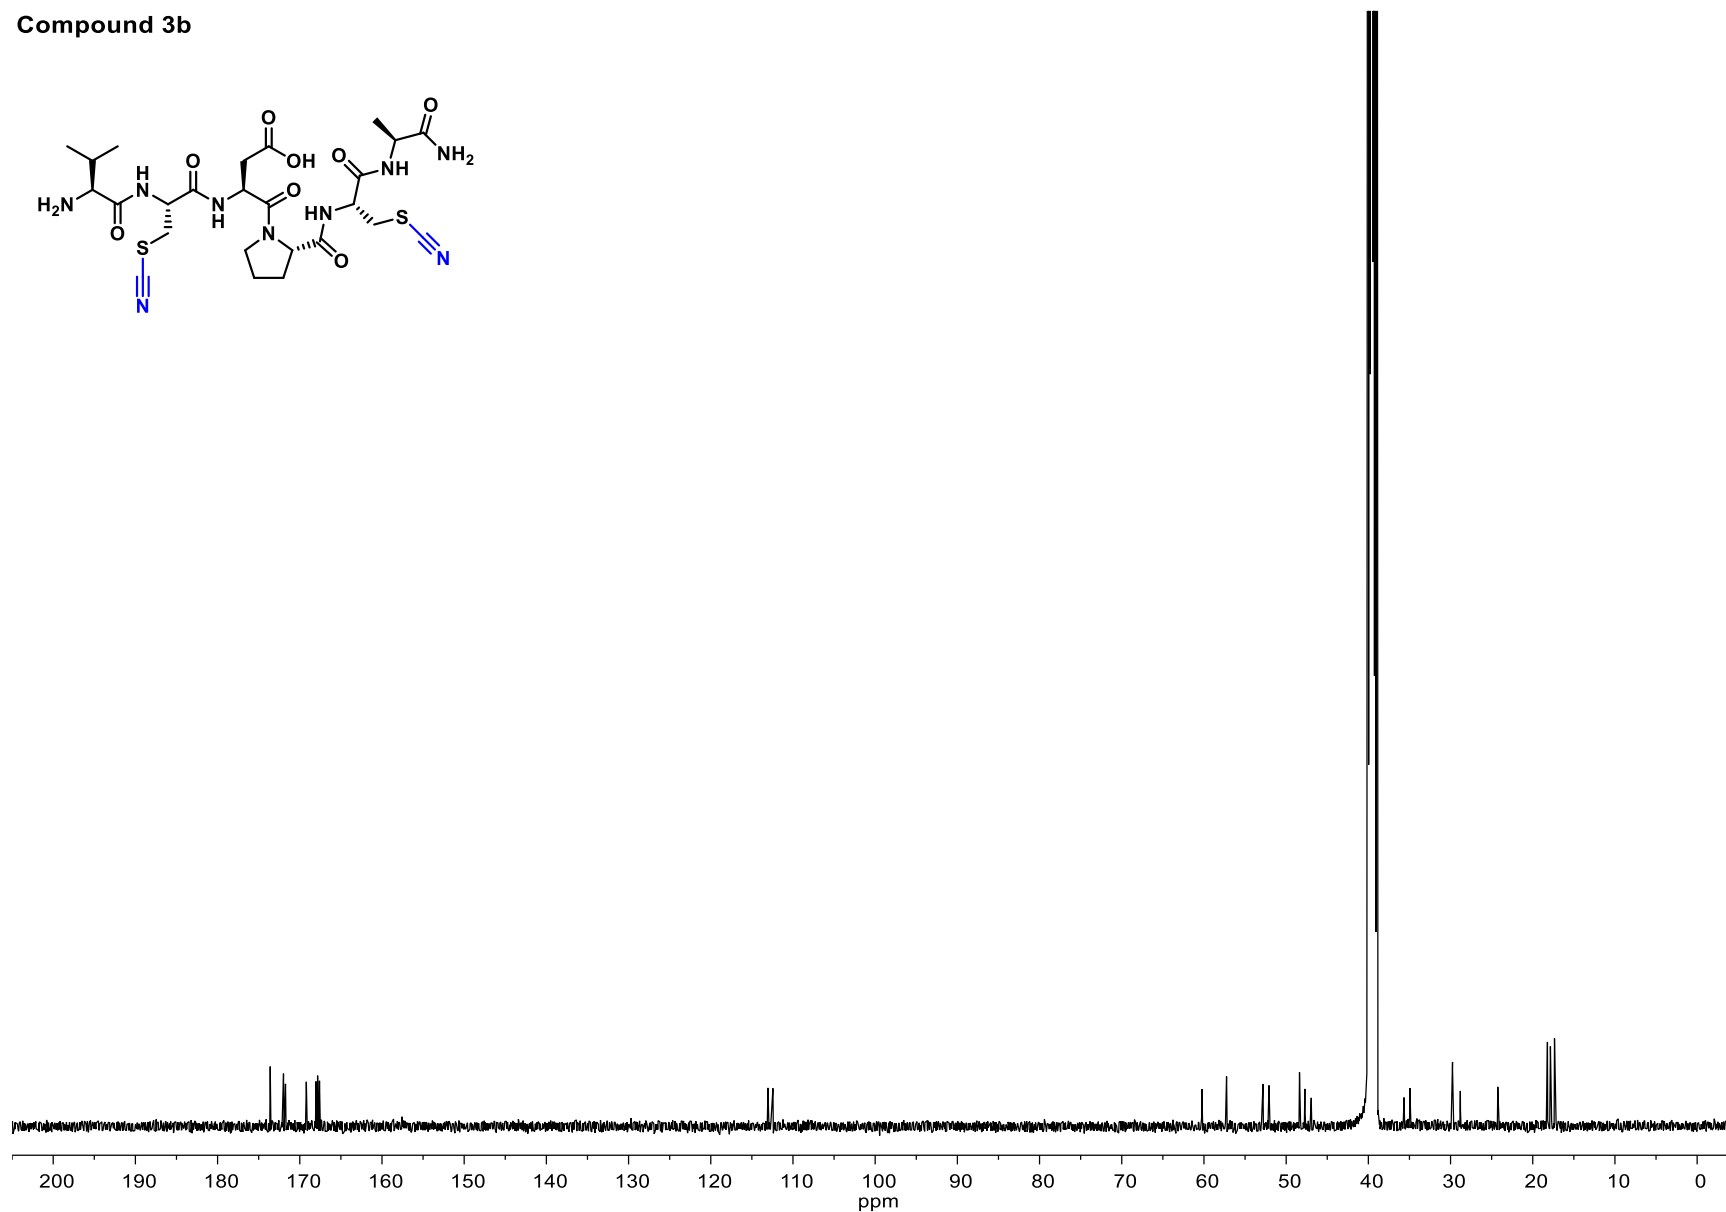

3b (<sup>13</sup>C-NMR, DMSO, 126 MHz)

Compound 3c

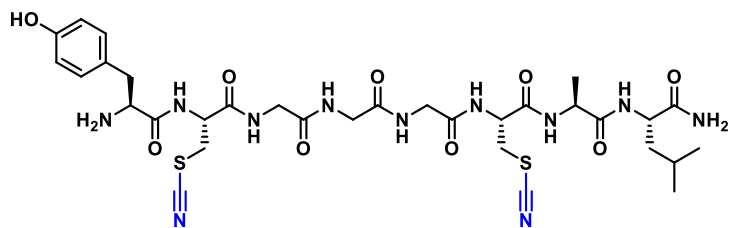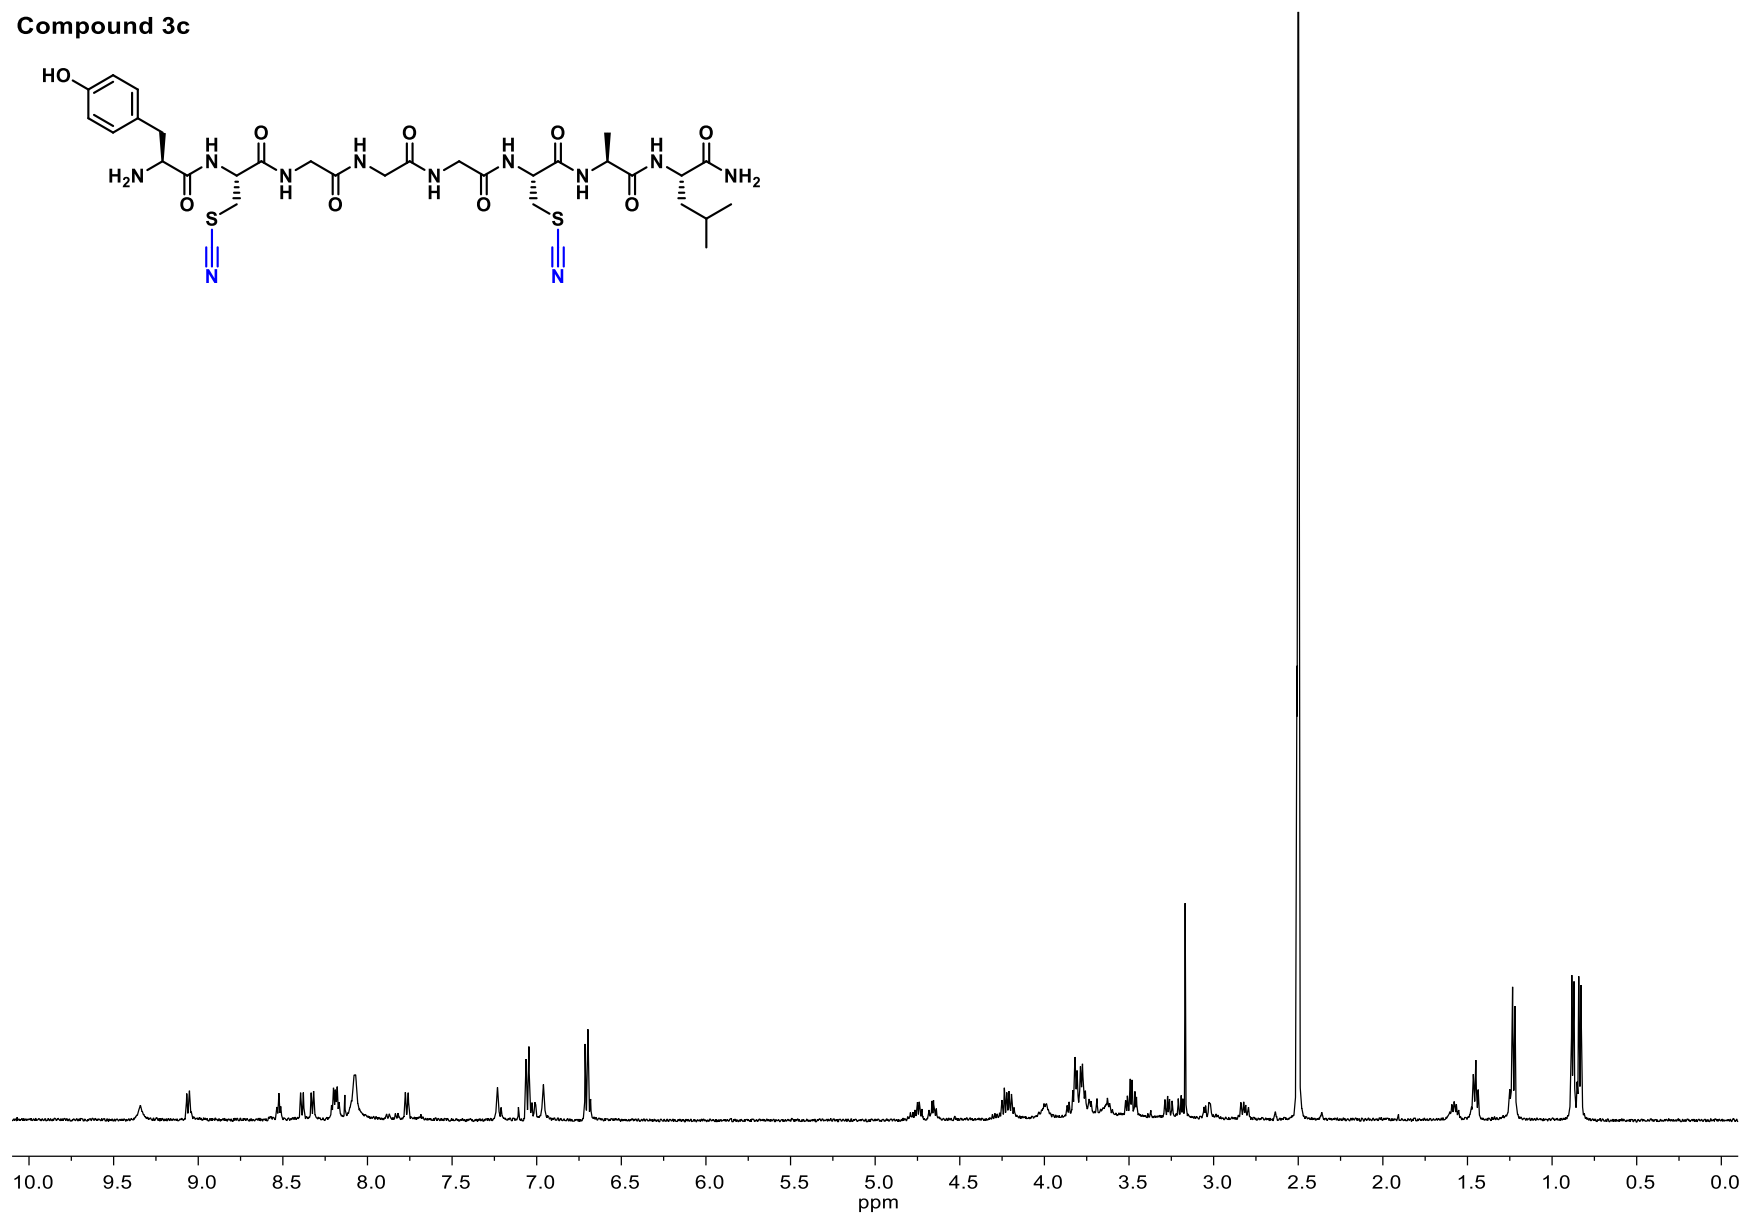

3c (<sup>1</sup>H-NMR, DMSO, 500 MHz)

Compound 3c

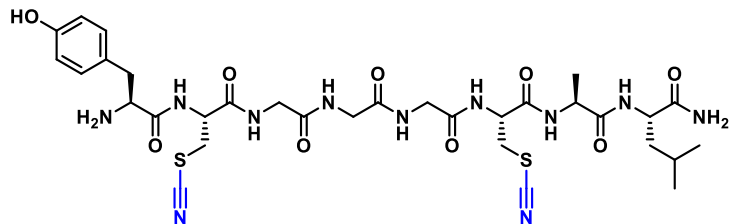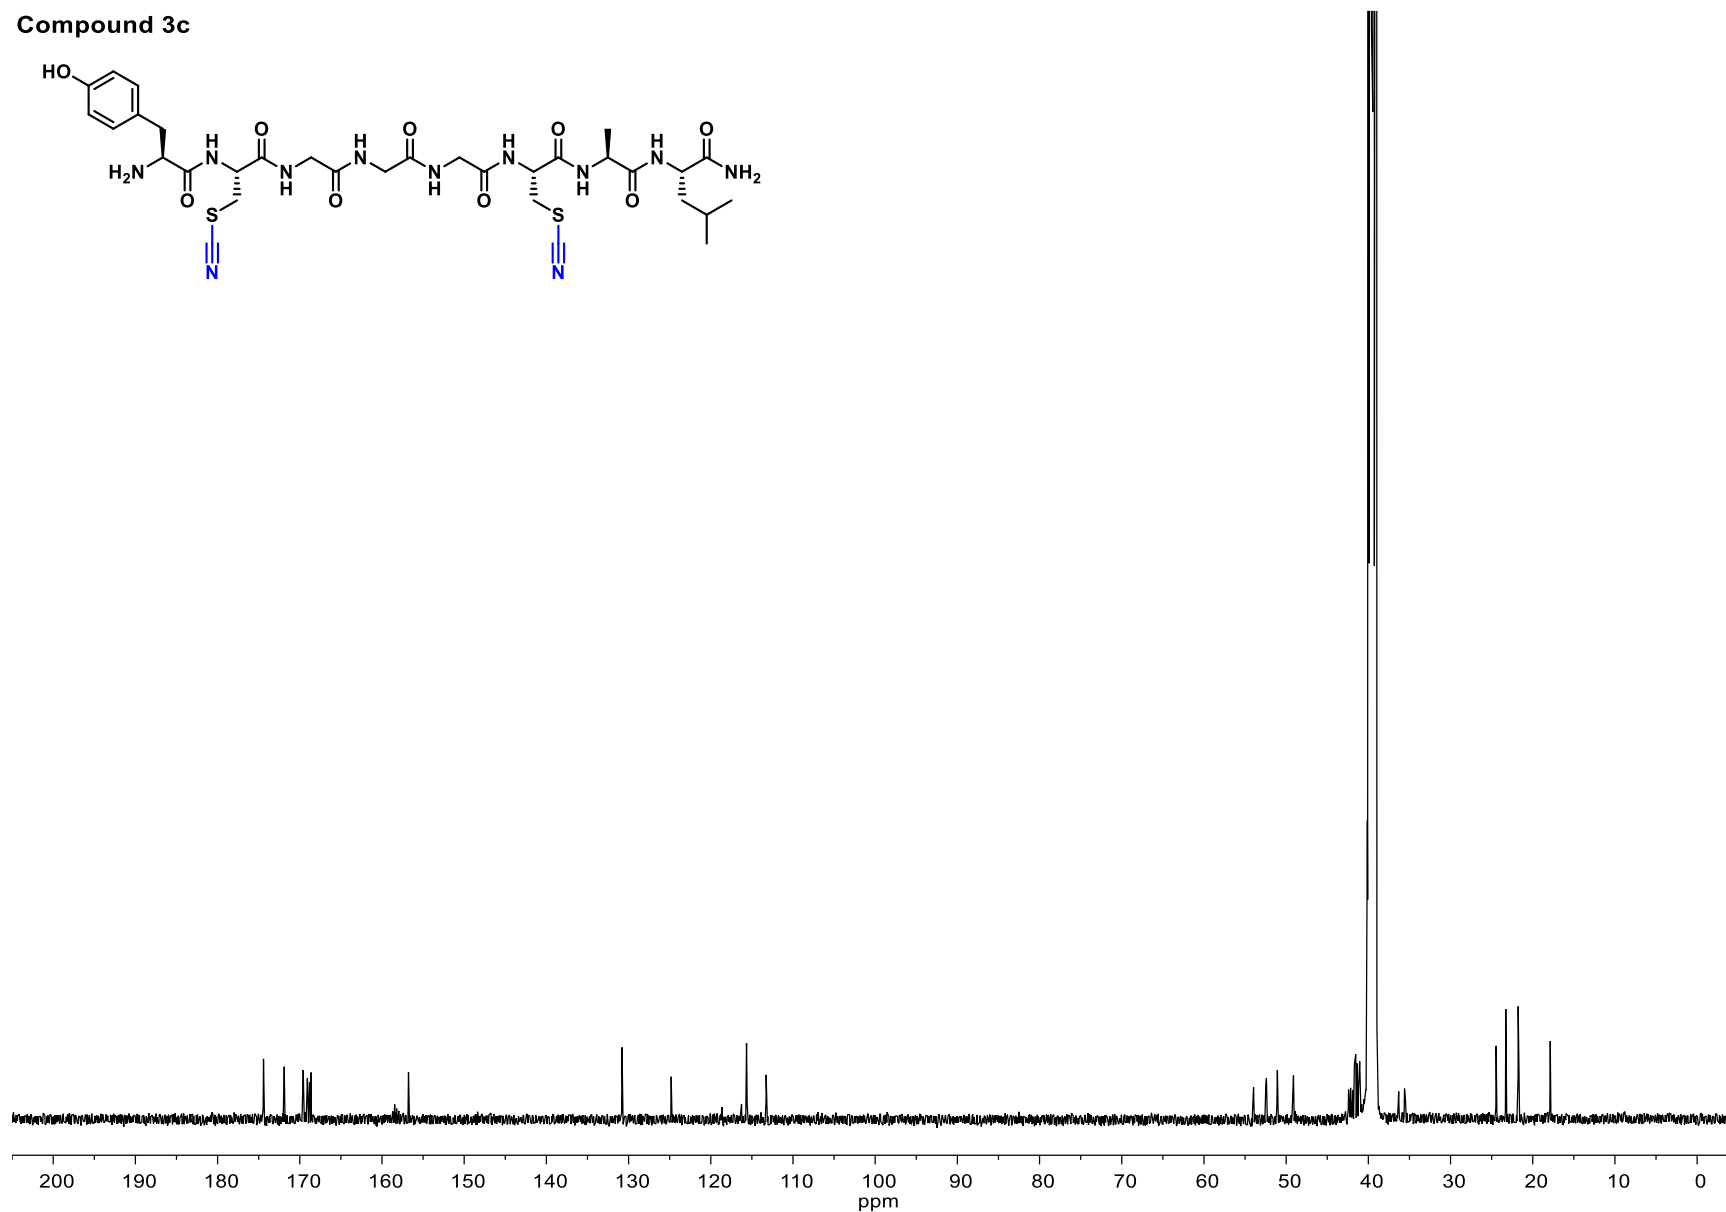

3c ( $^{13}\text{C}$ -NMR, DMSO, 126 MHz)



Compound 3d

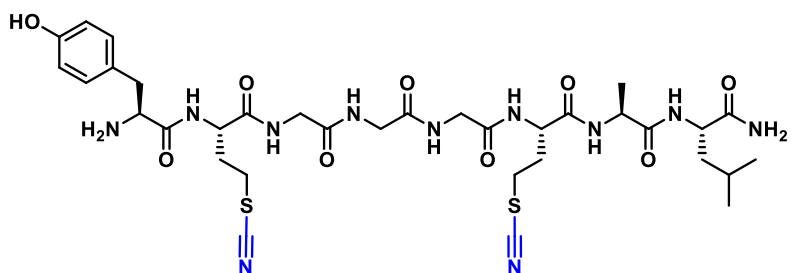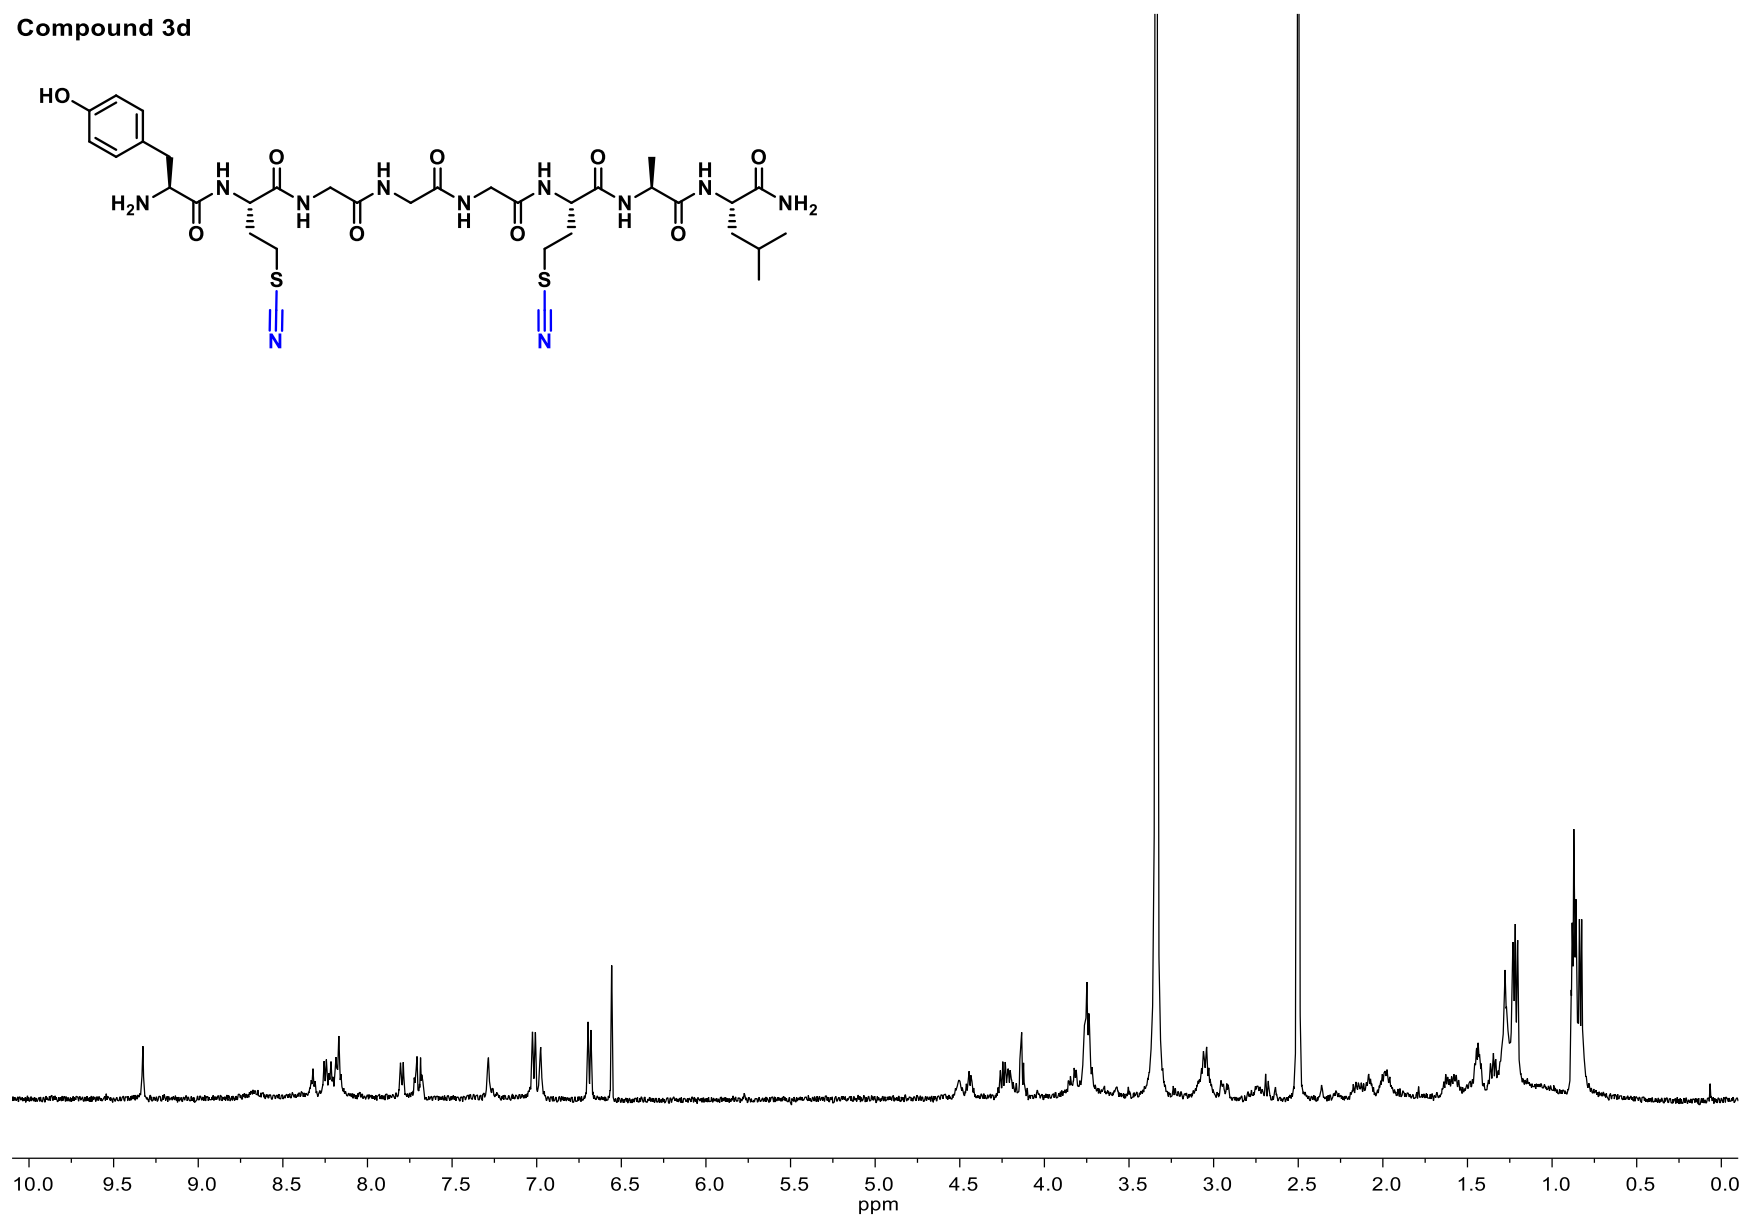

**3d** (<sup>1</sup>H-NMR, DMSO, 500 MHz)

Compound 3d

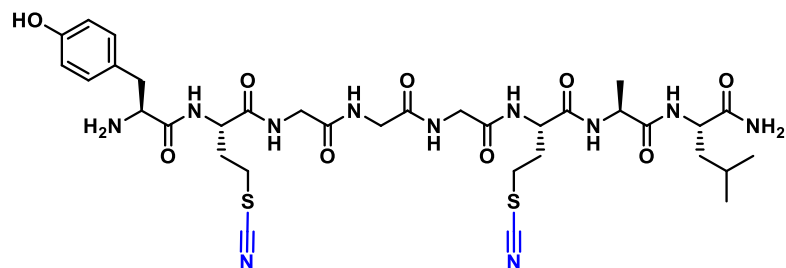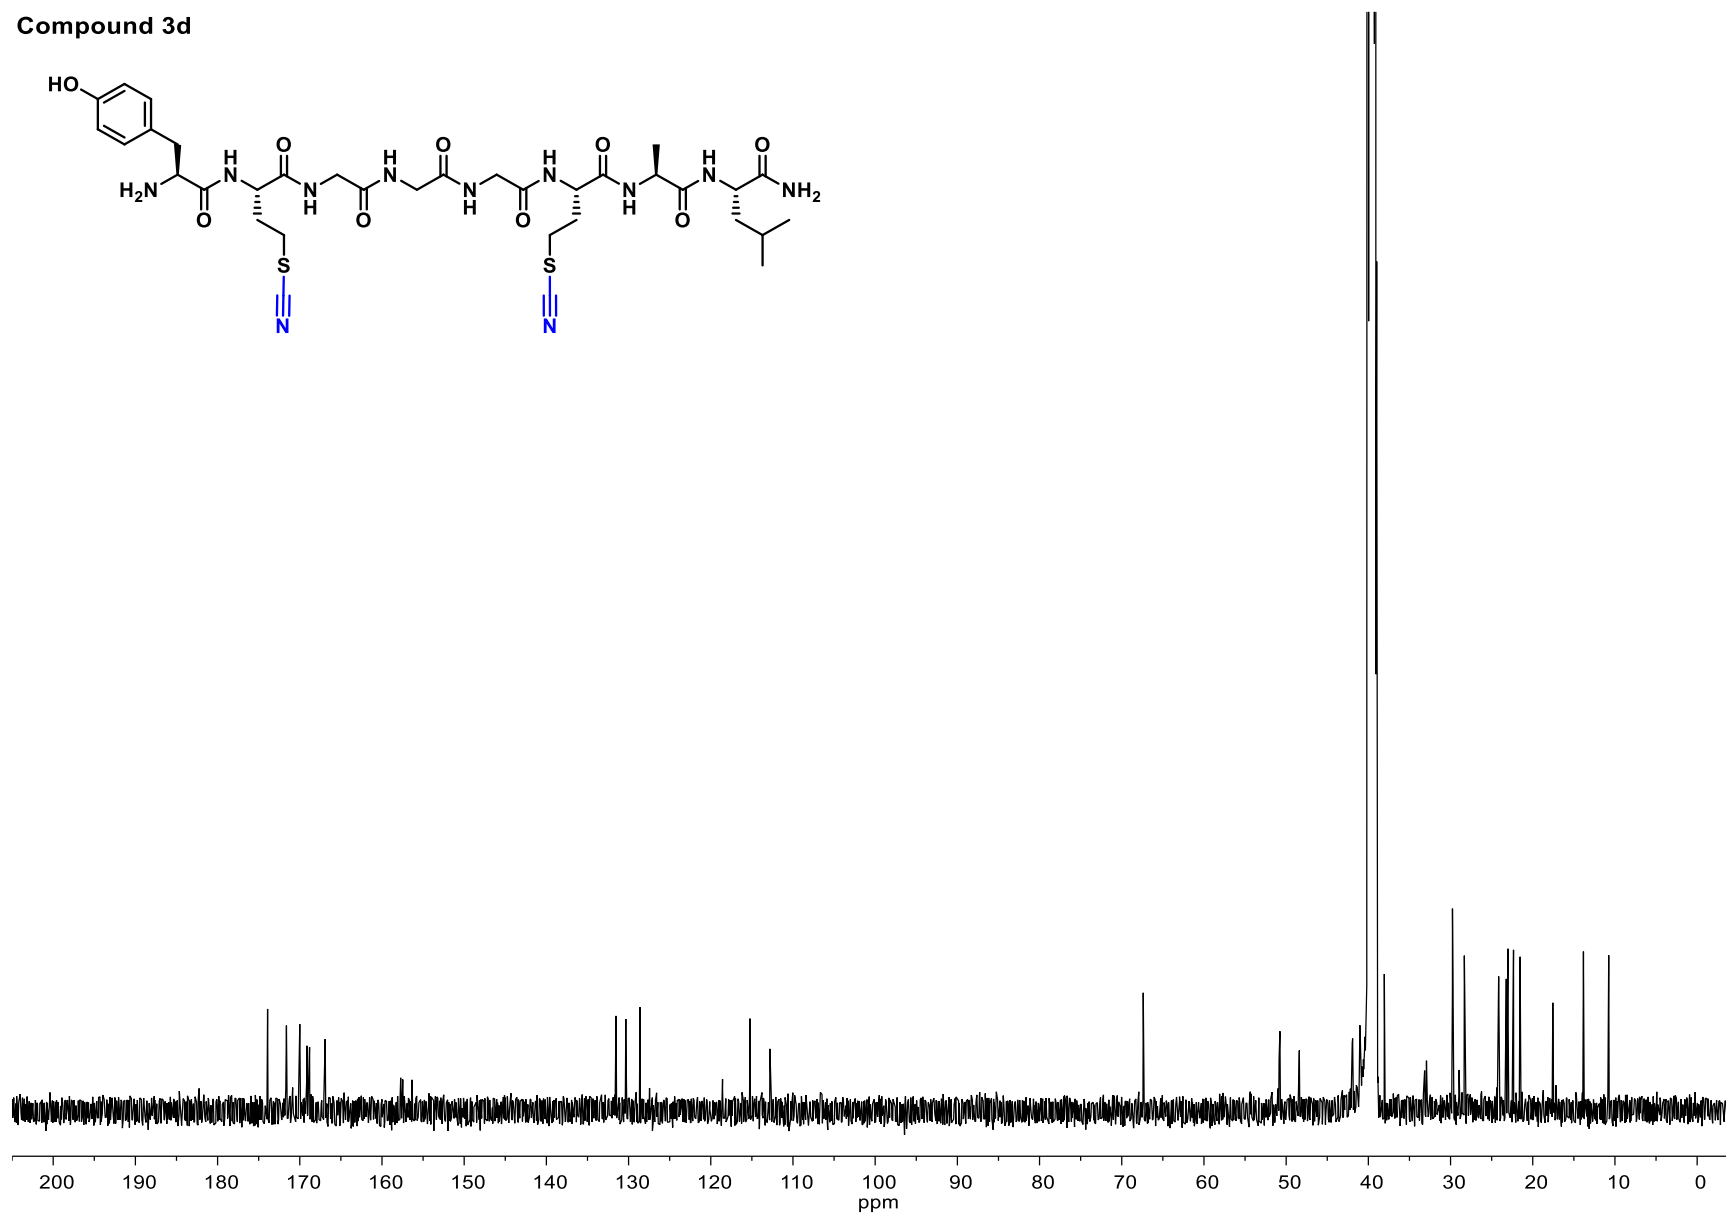

3d ( $^{13}\text{C}$ -NMR, DMSO, 126 MHz)

Compound 3e

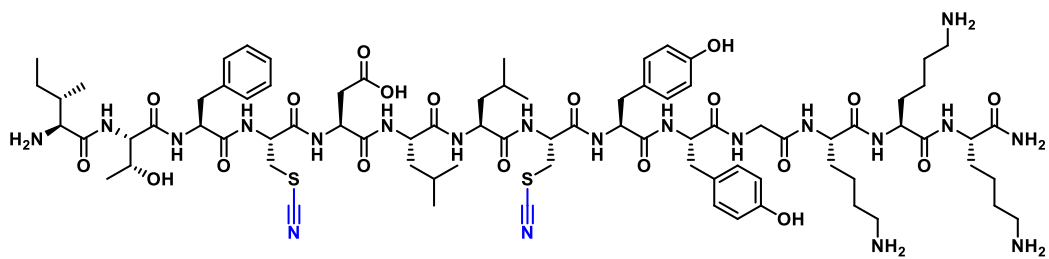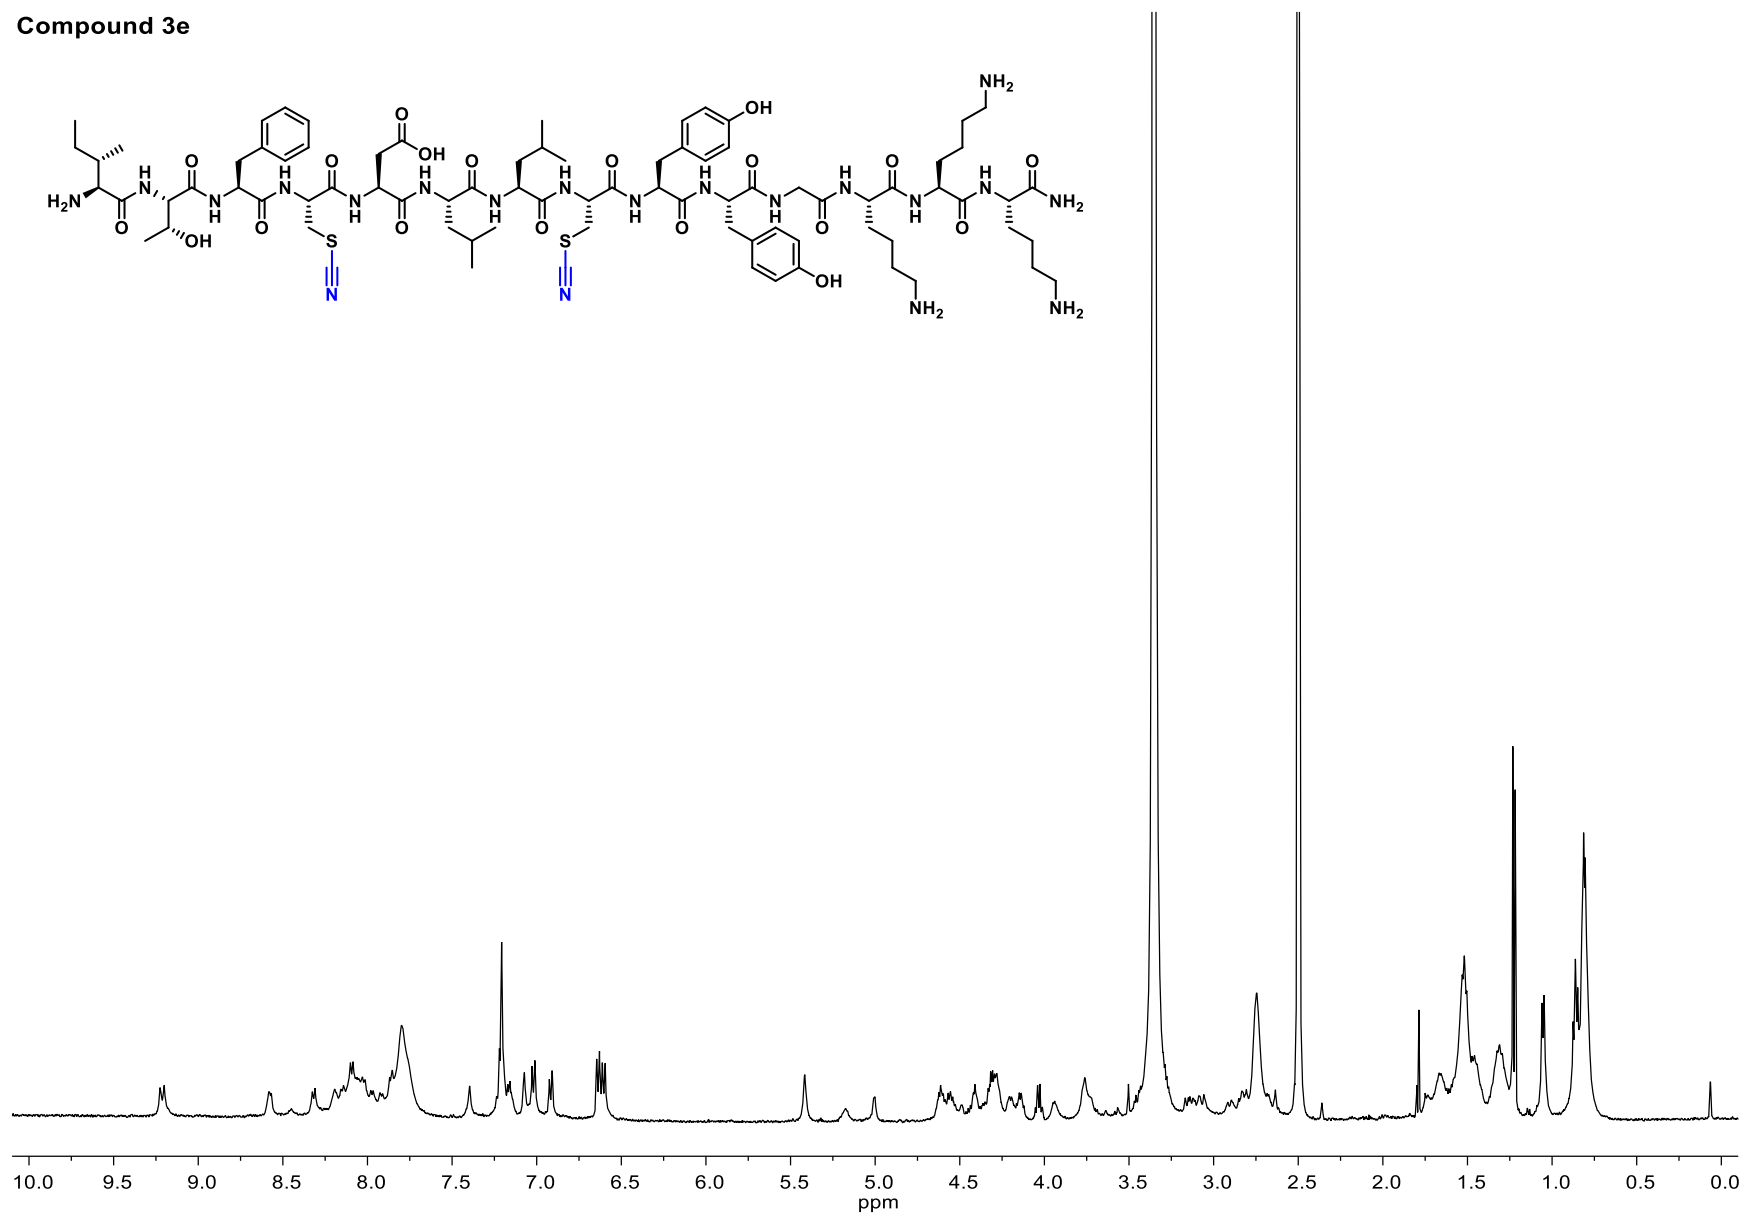

3e (<sup>1</sup>H-NMR, DMSO, 500 MHz)



Compound 3h

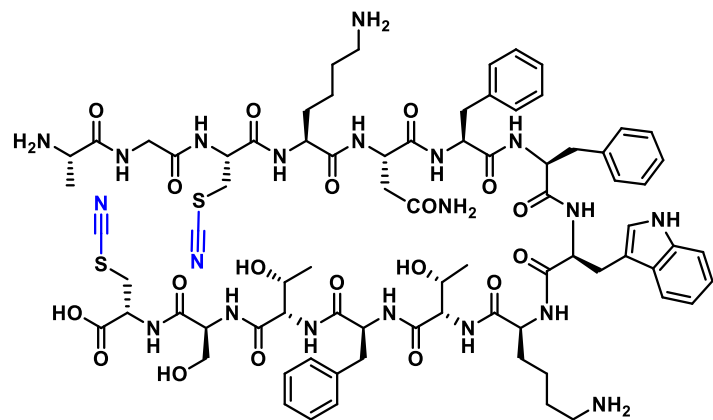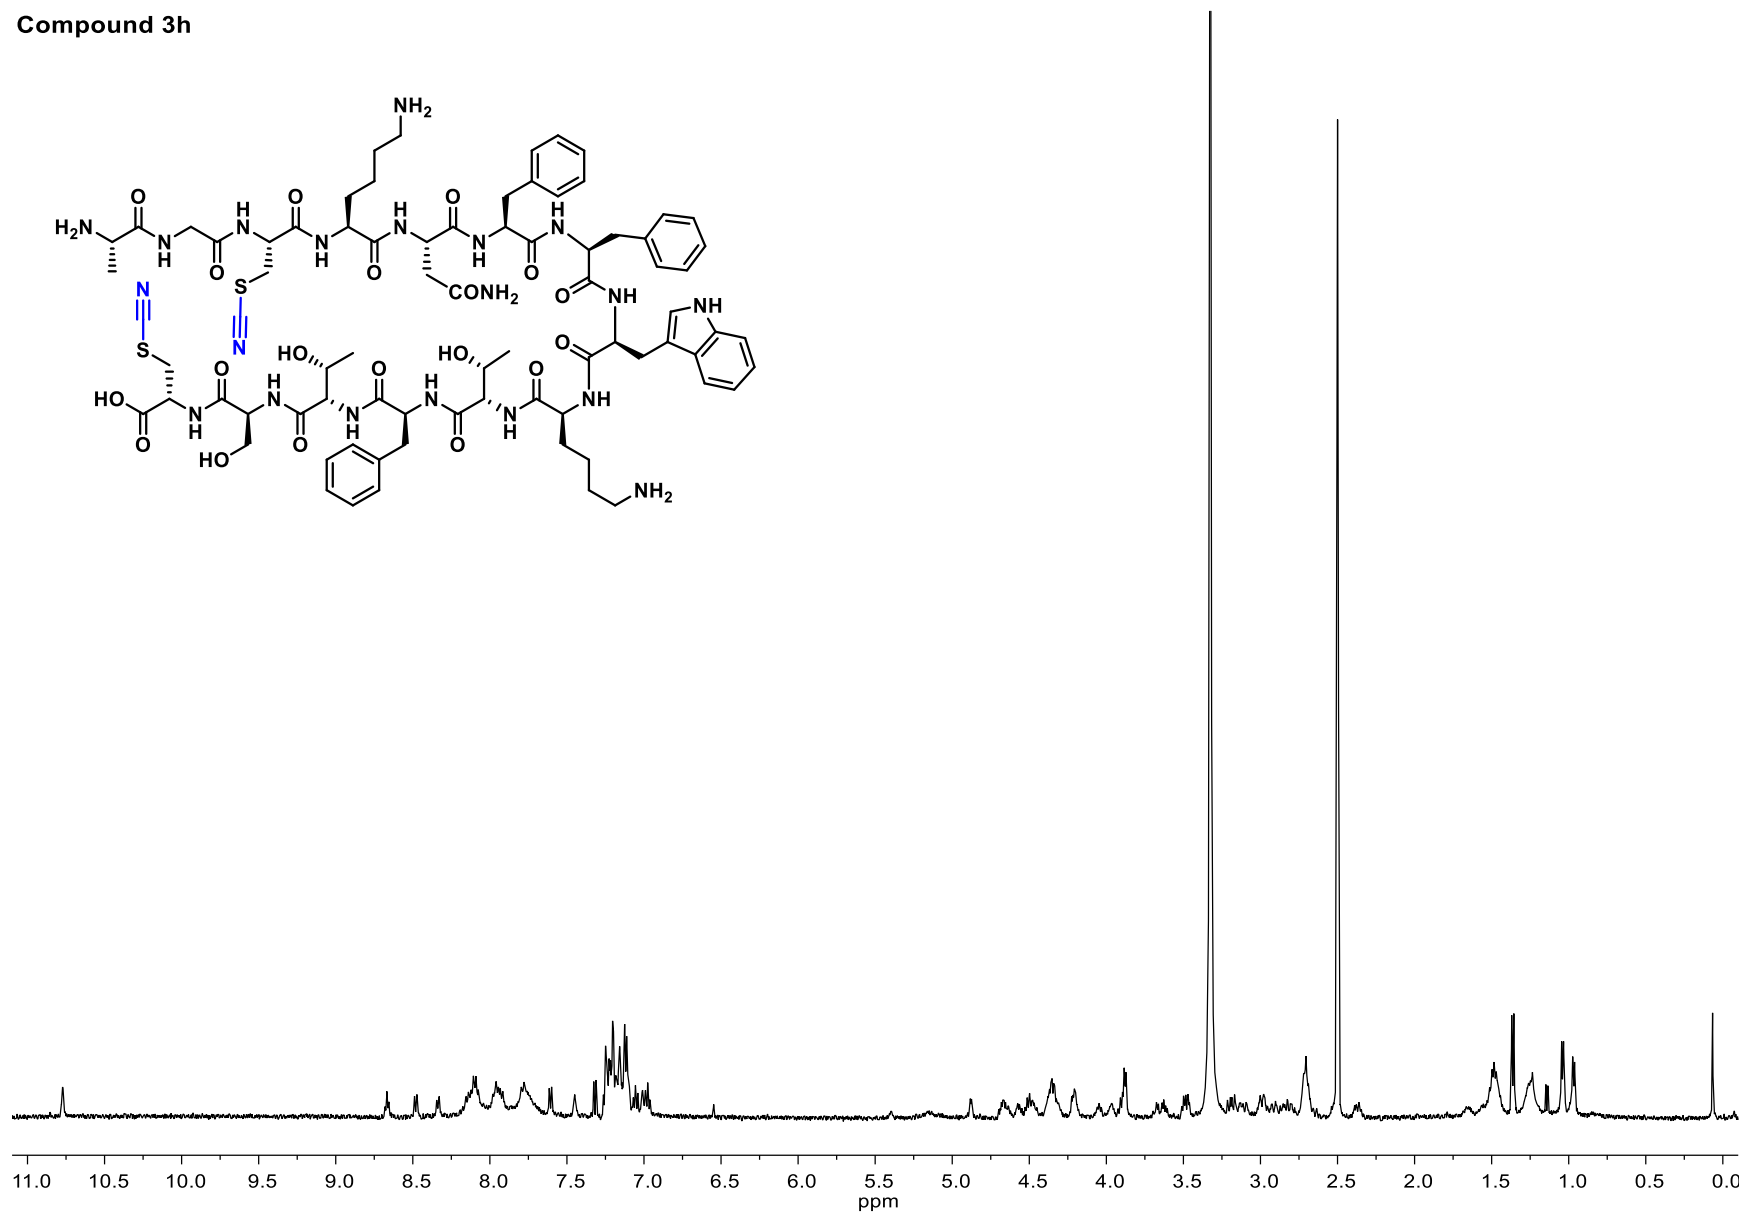

3h (<sup>1</sup>H-NMR, DMSO, 500 MHz)

Compound 3h

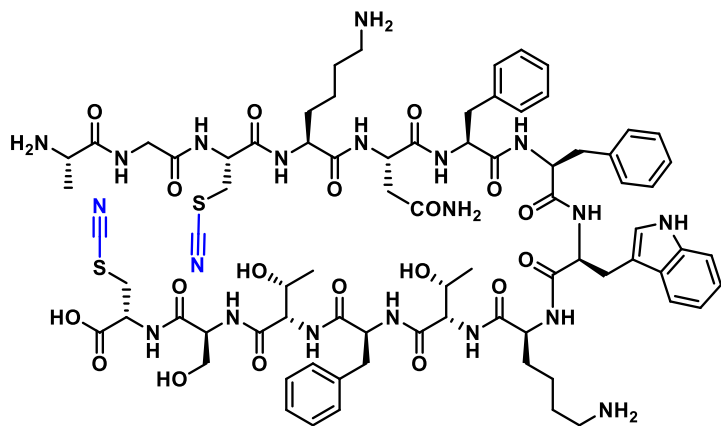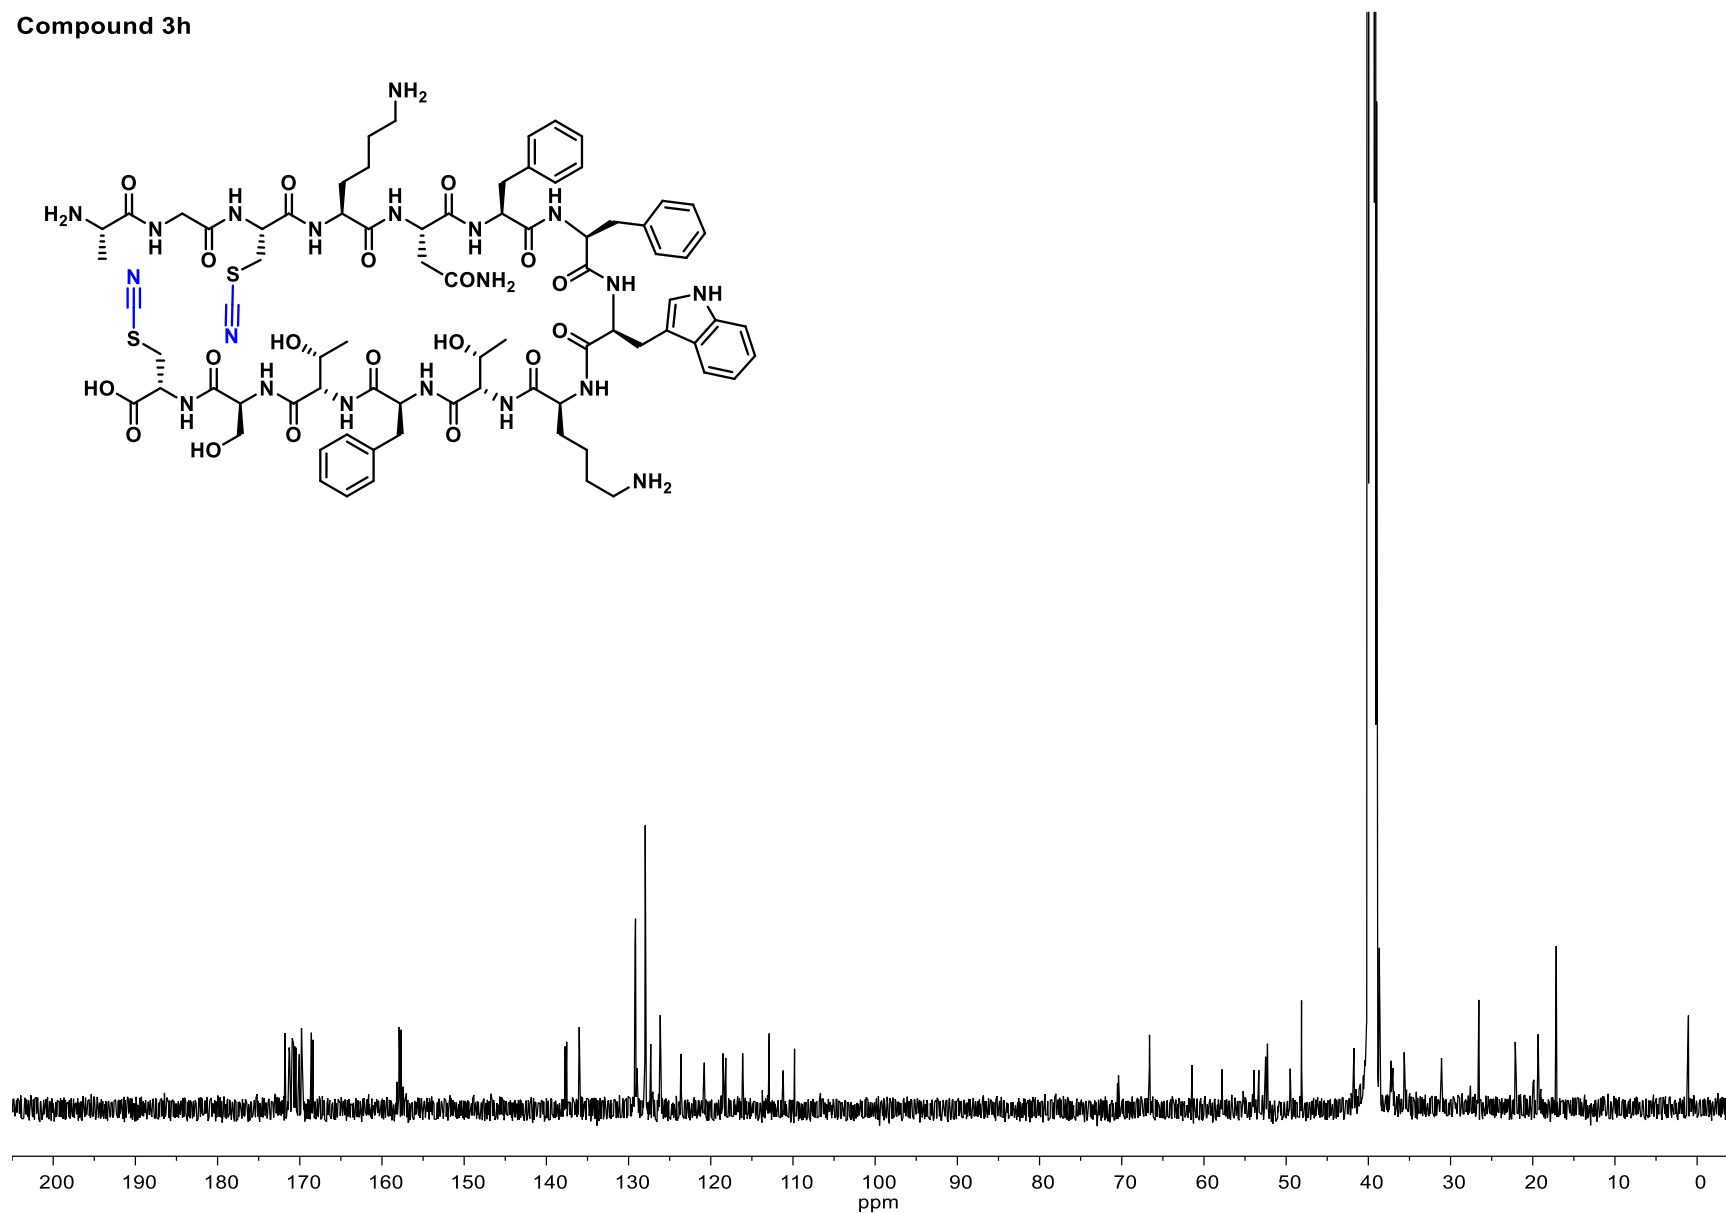

3h (<sup>13</sup>C-NMR, DMSO, 126 MHz)

Compound 4

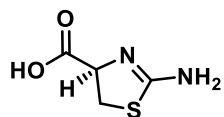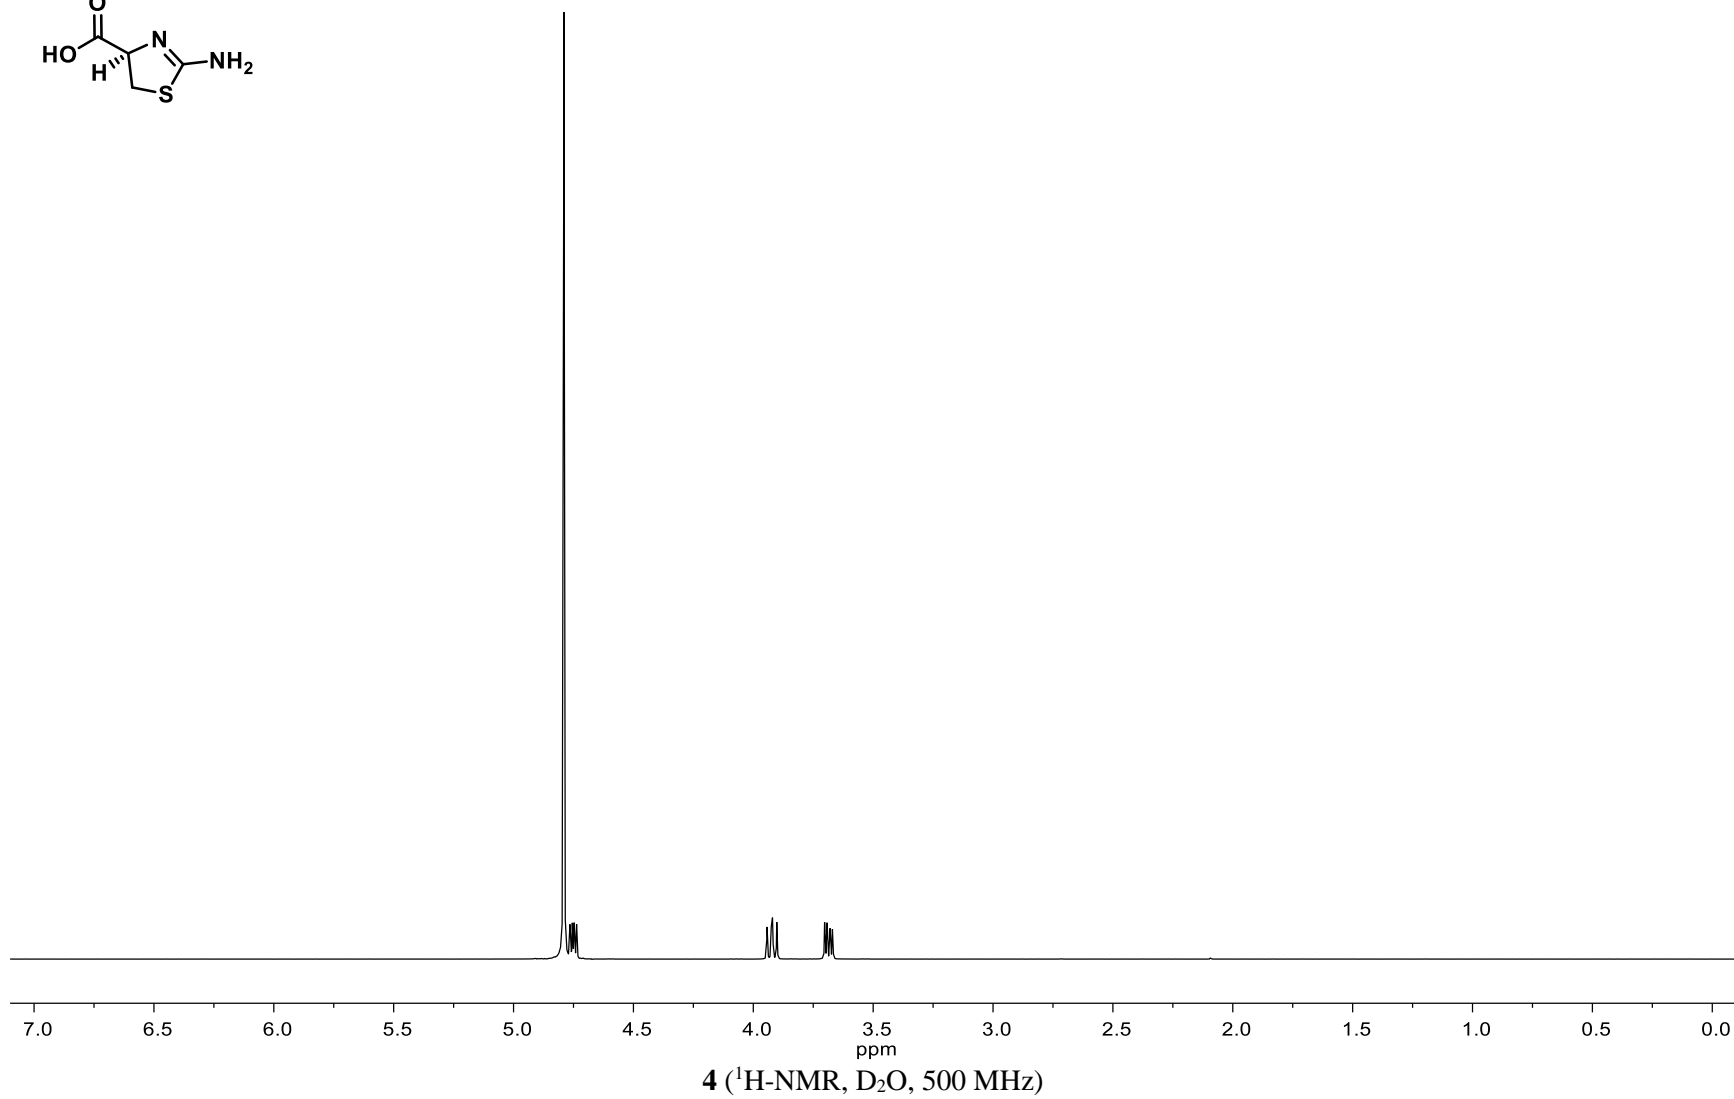

Compound 4

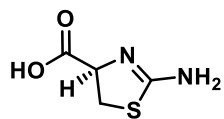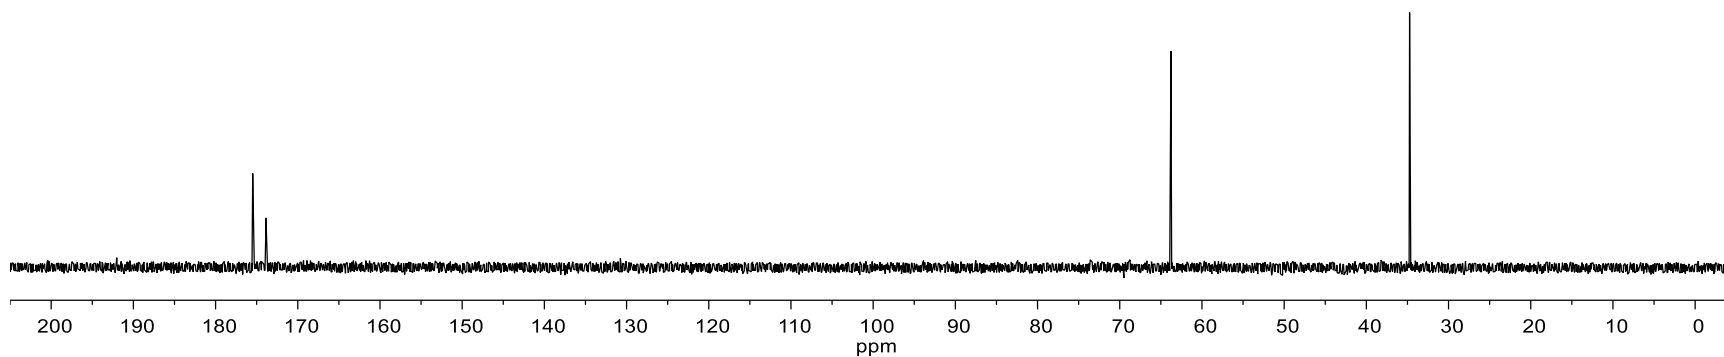

**4** ( $^{13}\text{C}$ -NMR,  $\text{D}_2\text{O}$ , 126 MHz)



Regenerated 1a

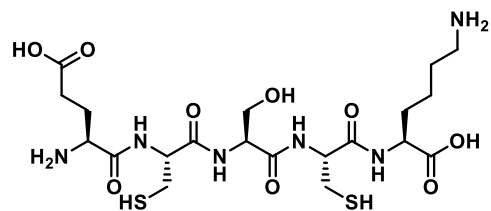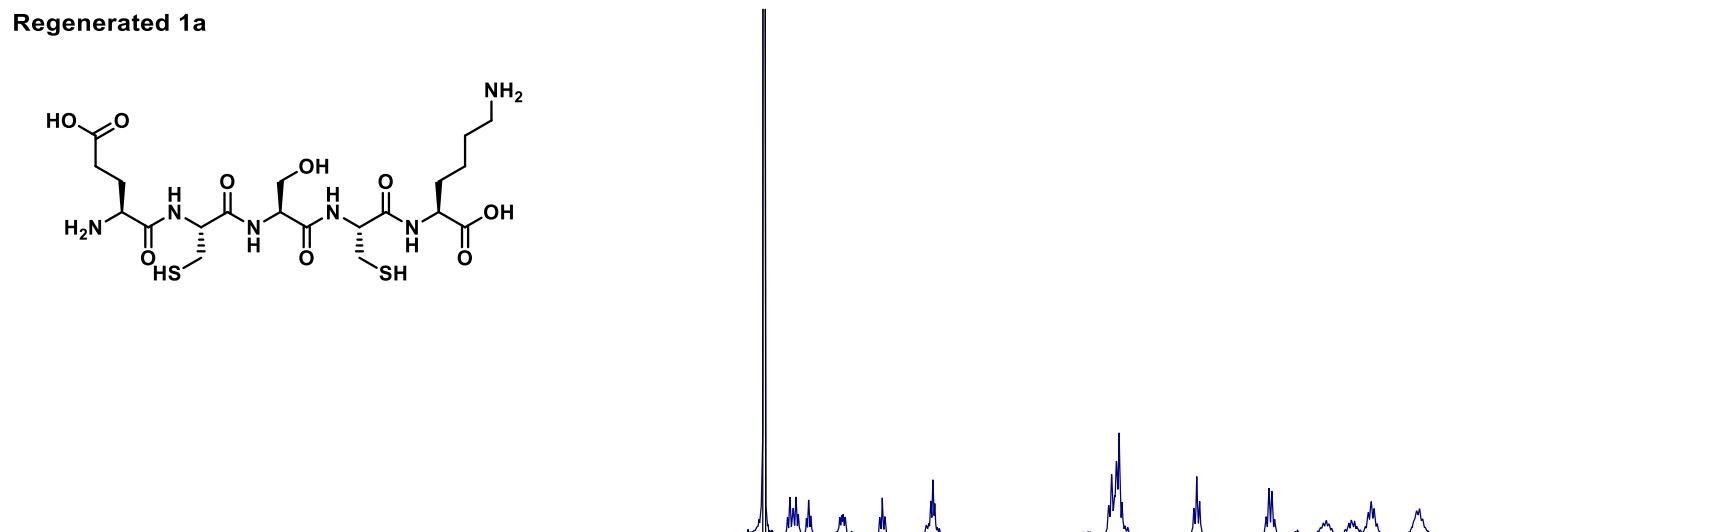

Compound 1a

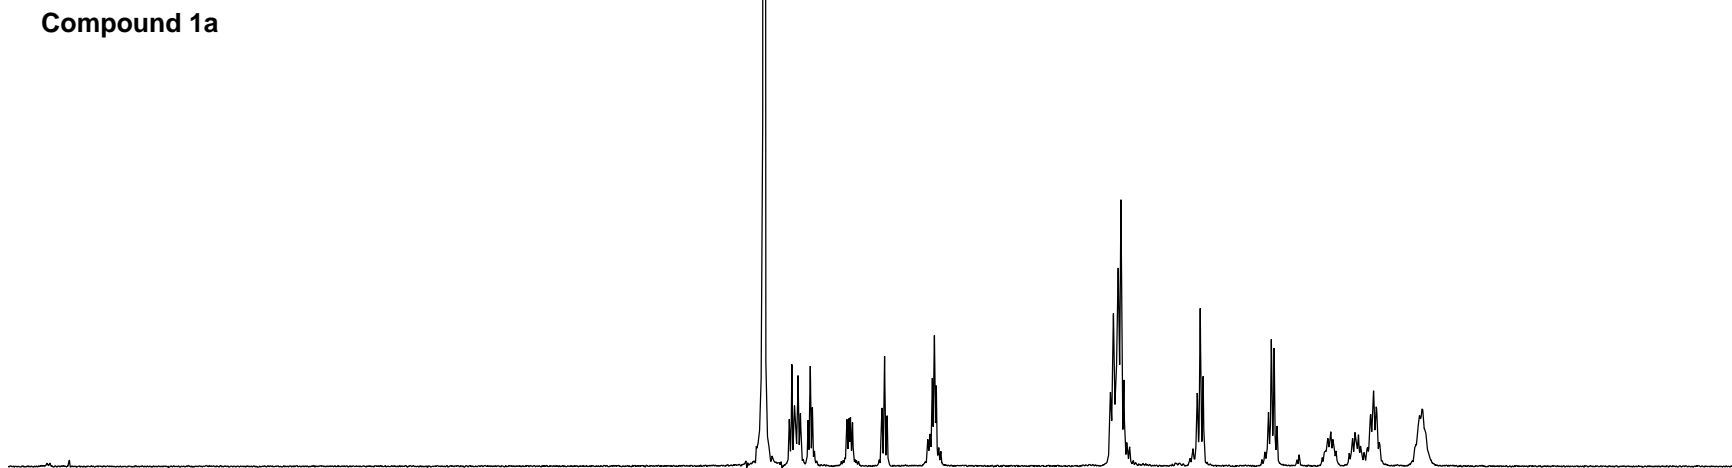

8.5 8.0 7.5 7.0 6.5 6.0 5.5 5.0 4.5 ppm 4.0 3.5 3.0 2.5 2.0 1.5 1.0 0.5 0.0

Regenerated 1a ( $^1\text{H-NMR}$ ,  $\text{D}_2\text{O}$ , 500 MHz)

**Regenerated 1b**

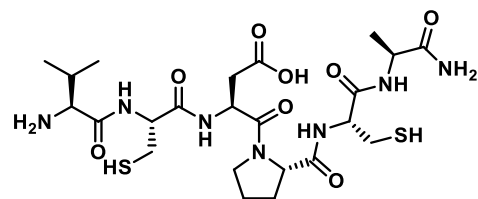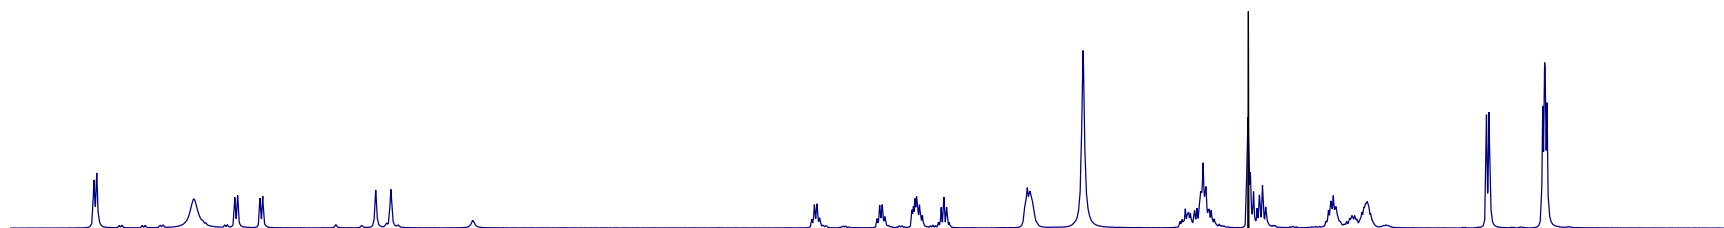

**Compound 1b**

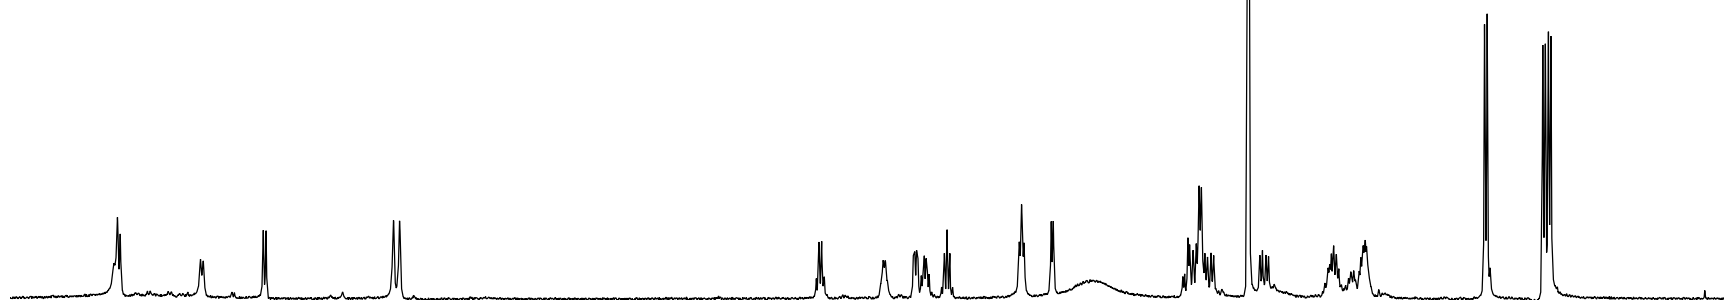

9.0 8.5 8.0 7.5 7.0 6.5 6.0 5.5 5.0 4.5 4.0 3.5 3.0 2.5 2.0 1.5 1.0 0.5 0.0  
ppm

**Regenerated 1b** ( $^1\text{H-NMR}$ ,  $\text{D}_2\text{O}$ , 500 MHz)

Regenerated 1c

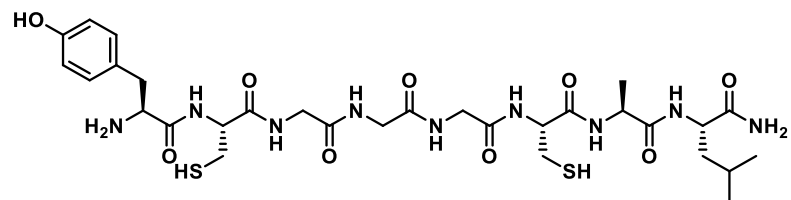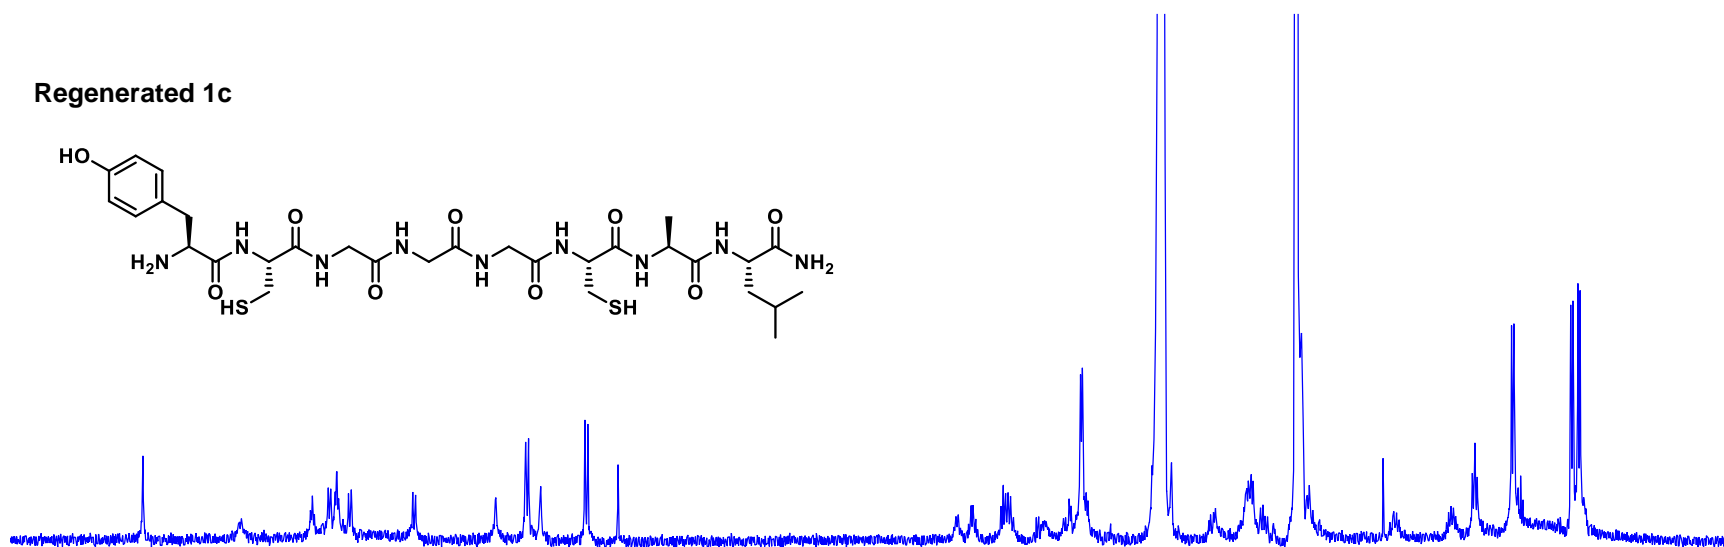

Compound 1c

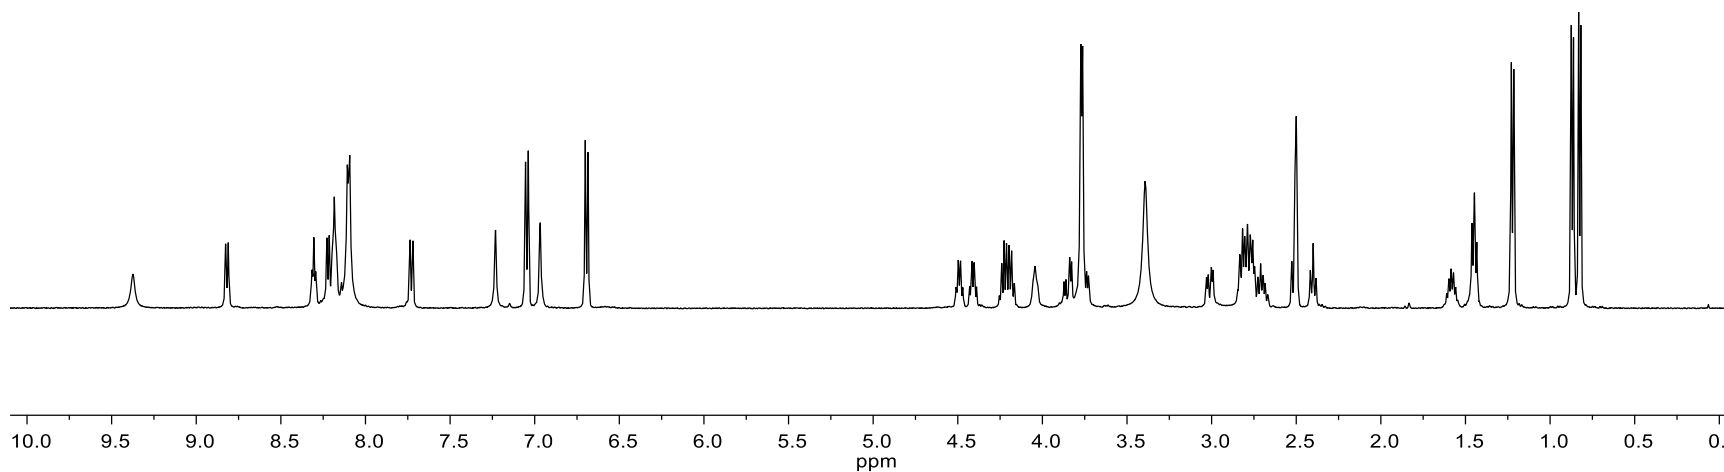

Regenerated 1c (<sup>1</sup>H-NMR, DMSO, 500 MHz)



Regenerated 1e

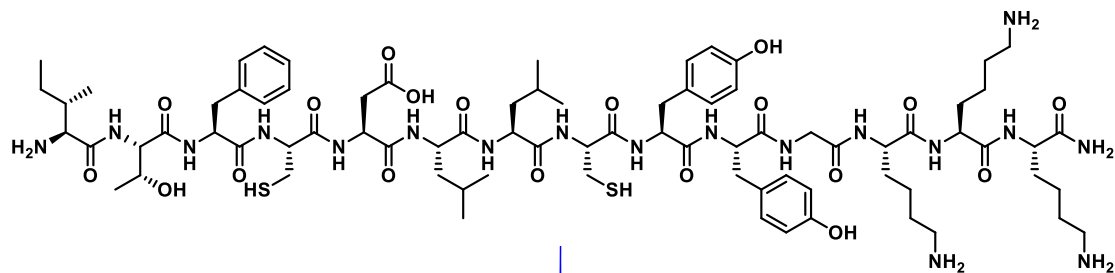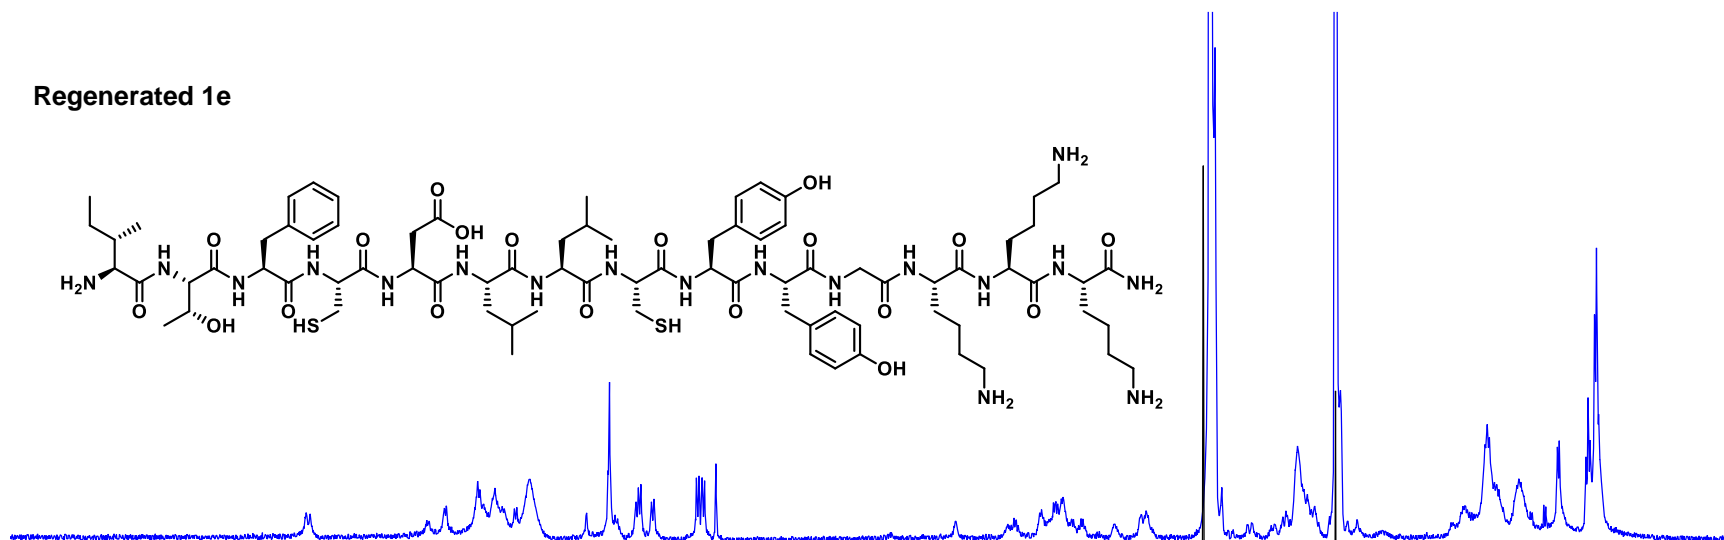

Compound 1e

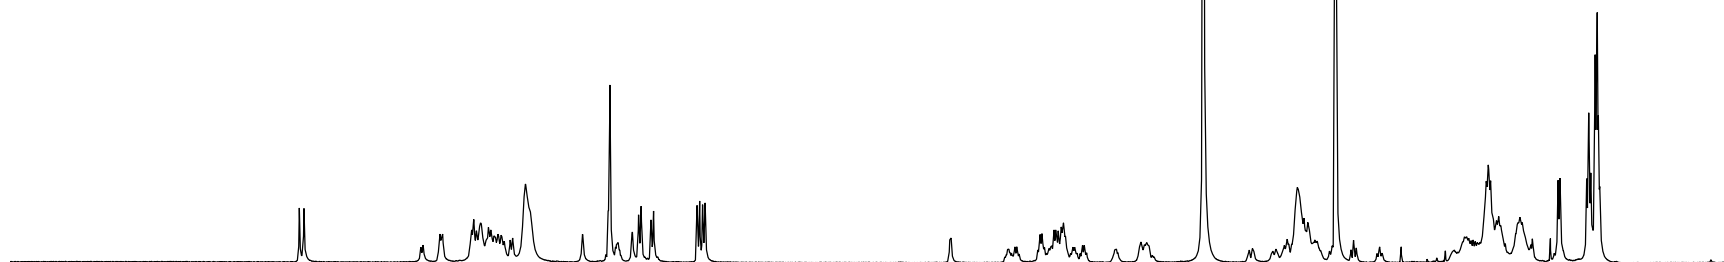

11.0 10.5 10.0 9.5 9.0 8.5 8.0 7.5 7.0 6.5 6.0 5.5 5.0 4.5 4.0 3.5 3.0 2.5 2.0 1.5 1.0 0.5 0.0  
ppm

Regenerated 1e (<sup>1</sup>H-NMR, DMSO, 500 MHz)



Compound 5

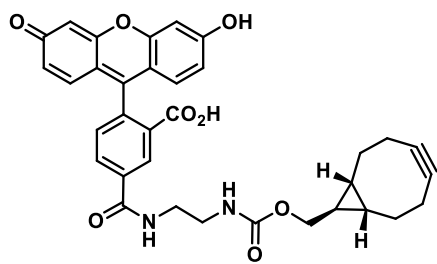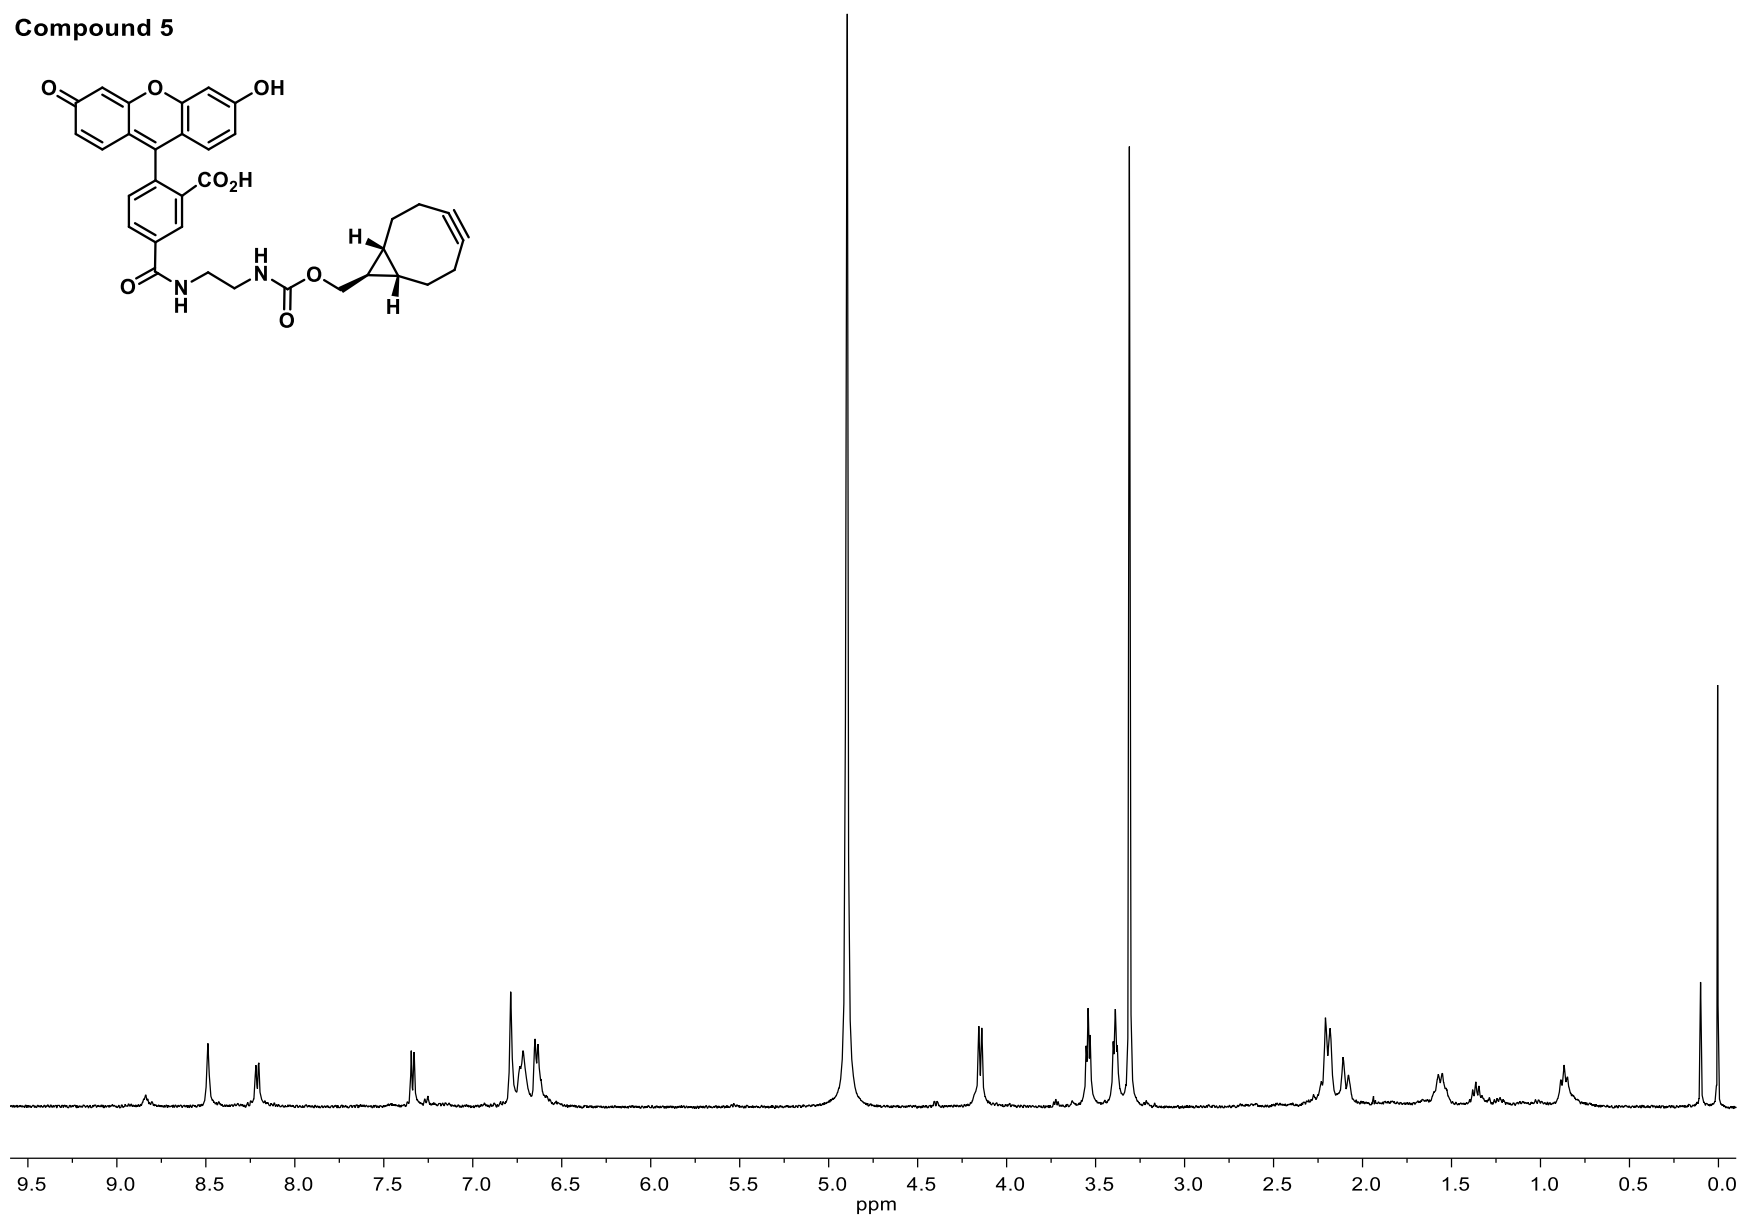

5 (<sup>1</sup>H-NMR, CD<sub>3</sub>OD, 500 MHz)
